# Supplementary material for: Regio- and diastereoselective dearomatizations of N-alkyl activated azaarenes: the maximization of the reactive sites
Source: PubMed Central journal article supplement — Chem Sci. 2019 Dec 17;11(5):1418–24. doi: 10.1039/c9sc04880d (PMC8147894; doi:10.1039/c9sc04880d), 2019-12-17

## Supporting Information

### Regio- and Diastereoselective Dearomatizations of *N*-Alkyl Activated Azaarenes: the Maximization of the Reactive Sites

Hong-Jie Miao,<sup>a</sup> Le-Le Wang,<sup>a</sup> Hua-Bin Han,<sup>a</sup> Yong-De Zhao,<sup>a,b</sup> Qi-Lin Wang<sup>a\*</sup> and Zhan-Wei  
Bu<sup>a\*</sup>

<sup>a</sup> College of Chemistry and Chemical Engineering, Henan University, Kaifeng 475004, China

<sup>b</sup> Henan Academy of Sciences, Zhengzhou 450002, China

E-mail: wangqilin@henu.edu.cn; buzhanwei@henu.edu.cn

#### Table of Contents

|                                                                                                                       |     |
|-----------------------------------------------------------------------------------------------------------------------|-----|
| 1. General methods.....                                                                                               | S2  |
| 2. Experimental data for the formation of <b>3</b> .....                                                              | S2  |
| 3. Screening chiral bases for asymmetric synthesis of <b>3a</b> .....                                                 | S19 |
| 4. Experimental data for the formation of <b>5</b> .....                                                              | S24 |
| 5. Experimental data for the formation of <b>6</b> .....                                                              | S37 |
| 6. Optimization of reaction conditions for the formation of <b>10a</b> .....                                          | S48 |
| 7. Experimental data for the formation of <b>10</b> .....                                                             | S49 |
| 8. Experimental data for derivations of <b>3g</b> .....                                                               | S58 |
| 9. Crystal structures of <b>3a</b> , <b>3zb</b> , <b>5m</b> , <b>6n</b> , <b>10g</b> , <b>10p</b> and <b>11</b> ..... | S62 |
| 10. <sup>1</sup> H NMR and <sup>13</sup> C NMR spectra.....                                                           | S63 |

## 1. General methods

NMR spectra were recorded with tetramethylsilane as the internal standard.  $^1\text{H}$  NMR spectra were recorded at 400 MHz, and  $^{13}\text{C}$  NMR spectra were recorded at 100 MHz (Bruker Avance).  $^1\text{H}$  NMR chemical shifts ( $\delta$ ) are reported in ppm relative to tetramethylsilane (TMS) with the solvent signal as the internal standard ( $\text{CDCl}_3$  at 7.26 ppm,  $(\text{CD}_3)_2\text{SO}$  at 2.50 ppm).  $^{13}\text{C}$  NMR chemical shifts are reported in ppm from tetramethylsilane (TMS) with the solvent resonance as the internal standard ( $\text{CDCl}_3$  at 77.00 ppm,  $(\text{CD}_3)_2\text{SO}$  at 39.52 ppm). Data are given as: s (singlet), d (doublet), t (triplet), q (quartet), dd (double of doublet), br (broad) or m (multiplets), coupling constants (Hz) and integration. Flash column chromatography was carried out using silica gel eluting with ethyl acetate and petroleum ether. High resolution mass spectra were obtained with the Q-TOF-Premier mass spectrometer. Reactions were monitored by TLC and visualized with ultraviolet light. IR spectra were recorded on a Thermo Fisher Nicolet Avatar 360 FTIR spectrometer on a KBr beam splitter. All the solvents were used directly without any purification. Enantiomeric excess was determined by HPLC analysis on chiralpak IA column, hexane/*i*-PrOH = 90/10, flow rate 0.5 mL/min, UV detection at 254 nm.

## 2. Experimental data for the formation of 3

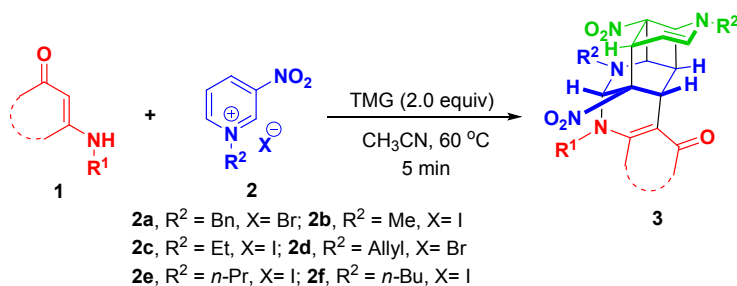

**General procedure:** To a 5.0 mL vial were successively added enaminones **1** (0.15 mmol), *N*-alkyl 3-nitropyridinium salts **2** (0.33 mmol) and 0.8 mL of  $\text{CH}_3\text{CN}$ . And then, TMG (34.6 mg, 0.30 mmol) was added by syringe. The resulting mixture was stirred at 60 °C for 5 min, and then the reaction mixture was directly subjected to flash column chromatography on silica gel (petroleum ether/ ethyl acetate) to afford the corresponding products **3**. For some cases, such as **3a-b**, **3d-h**, **3k**, **3n** and **3z**, the products were precipitated from the homogeneous reaction systems and only a filtration was needed to purify them.

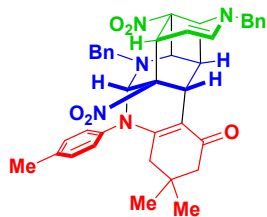

7,11-dibenzyl-3,3-dimethyl-7b,13-dinitro-5-(*p*-tolyl)-3,4,5,6,7,7a,7b,8,11,11a,11b,12-dodecahydro-6,8,12-(epimethanetriyl)benzo[*d*]pyrido[3',2':3,4]cyclobuta[1,2-*g*][1,3]diazocin-1(2*H*)-one (**3a**)

Yellow solid obtained by filtration of the precipitate; 93.8 mg, 95% yield; dr > 20:1; reaction time = 5 min; mp 222.4-223.7 °C; <sup>1</sup>H NMR (400 MHz, CDCl<sub>3</sub>), δ 7.42-7.34 (m, 4H), 7.28-7.11 (m, 8H), 6.98 (s, 2H), 6.46 (d, *J* = 8.0 Hz, 1H), 5.27 (s, 1H), 4.39 (q, *J* = 16.0 Hz, 2H), 4.20 (d, *J* = 16.0 Hz, 1H), 4.08 (t, *J* = 8.0 Hz, 1H), 3.95 (s, 1H), 3.84 (d, *J* = 16.0 Hz, 2H), 3.74 (dd, *J*<sub>1</sub> = *J*<sub>2</sub> = 4.0 Hz, 1H), 3.26 (d, *J* = 8.0 Hz, 1H), 2.55 (t, *J* = 8.0 Hz, 1H), 2.35 (s, 3H), 2.24 (q, *J* = 16.0 Hz, 3H), 1.87 (d, *J* = 16.0 Hz, 1H), 1.00 (s, 3H), 0.94 (s, 3H); <sup>13</sup>C NMR (100 MHz, CDCl<sub>3</sub>) δ 194.1, 153.6, 140.0, 139.2, 138.3, 136.8, 136.6, 128.7, 128.0 (2C), 127.8, 127.7, 107.0, 87.9, 83.3, 82.5, 80.0, 59.0, 57.6, 55.4, 51.5, 50.1, 45.8, 41.8, 39.1, 32.9, 29.9, 26.2, 24.8, 21.1, two carbons missing in the aromatic region. IR (KBr) ν 3030, 2956, 2870, 1586, 1393, 748 cm<sup>-1</sup>. HRMS (ESI) calcd for C<sub>39</sub>H<sub>40</sub>N<sub>5</sub>O<sub>5</sub> [M+H]<sup>+</sup> 658.3024, found 658.3023.

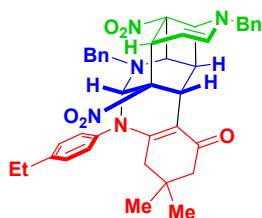

7,11-dibenzyl-5-(4-ethylphenyl)-3,3-dimethyl-7b,13-dinitro-3,4,5,6,7,7a,7b,8,11,11a,11b,12-dodecahydro-6,8,12-(epimethanetriyl)benzo[*d*]pyrido[3',2':3,4]cyclobuta[1,2-*g*][1,3]diazocin-1(2*H*)-one (**3b**)

Yellow solid obtained by filtration of the precipitate; 82.2 mg, 82% yield; dr > 20:1; reaction time = 5 min; mp 200.3-201.2 °C; <sup>1</sup>H NMR (400 MHz, CDCl<sub>3</sub>), δ 7.42-7.35 (m, 4H), 7.28-7.11 (m, 8H), 7.00 (s, 2H), 6.46 (d, *J* = 8.0 Hz, 1H), 5.28 (s, 1H), 4.39 (q, *J* = 16.0 Hz, 2H), 4.21 (d, *J* = 16.0 Hz, 1H), 4.09 (t, *J* = 8.0 Hz, 1H), 3.96 (s, 1H), 3.87 (dd, *J*<sub>1</sub> = *J*<sub>2</sub> = 4.0 Hz, 2H), 3.75 (dd, *J*<sub>1</sub> = *J*<sub>2</sub> = 4.0 Hz, 1H), 3.26 (d, *J* = 8.0 Hz, 1H), 2.66 (q, *J* = 8.0 Hz, 2H), 2.56 (t, *J* = 8.0 Hz, 1H), 2.34-2.17 (m, 3H), 1.88 (d, *J* = 16.0 Hz, 1H), 1.24 (t, *J* = 8.0 Hz, 3H), 1.01 (s, 3H), 0.95 (s, 3H); <sup>13</sup>C NMR (100

MHz, CDCl<sub>3</sub>) δ 194.1, 153.6, 144.5, 140.2, 139.2, 136.9, 136.6, 128.7, 128.1, 128.0, 127.8, 127.7, 107.0, 87.9, 83.3, 82.6, 80.0, 59.0, 57.7, 55.5, 51.6, 50.2, 45.8, 41.8, 39.2, 33.0, 29.8, 28.4, 26.2, 24.9, 15.2, two carbons missing in the aromatic region. IR (KBr) ν 3031, 2960, 2869, 1587, 1386, 741 cm<sup>-1</sup>. HRMS (ESI) calcd for C<sub>40</sub>H<sub>42</sub>N<sub>5</sub>O<sub>5</sub> [M+H]<sup>+</sup> 672.3181, found 672.3178.

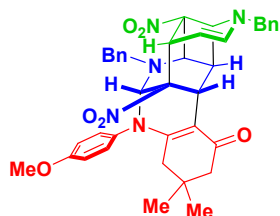

7,11-dibenzyl-5-(4-methoxyphenyl)-3,3-dimethyl-7b,13-dinitro-3,4,5,6,7,7a,7b,8,11,11a,11b,12-dodecahydro-6,8,12-(epimethanetriyl)benzo[*d*]pyrido[3',2':3,4]cyclobuta[1,2-*g*][1,3]diazocin-1(2*H*)-one (**3c**)

Yellow solid obtained by column chromatography (petroleum ether/ethyl acetate = 5:1); 80.7 mg, 80% yield; dr > 20:1; reaction time = 5 min; mp 206.8-208.1 °C; <sup>1</sup>H NMR (400 MHz, CDCl<sub>3</sub>) δ 7.42-7.34 (m, 4H), 7.29-7.25 (m, 5H), 7.12 (t, *J* = 8.0 Hz, 2H), 6.99 (s, 2H), 6.87 (s, 2H), 6.46 (d, *J* = 12.0 Hz, 1H), 5.26 (d, *J* = 4.0 Hz, 1H), 4.39 (q, *J* = 20.0 Hz, 2H), 4.23 (d, *J* = 20.0 Hz, 1H), 4.09 (t, *J* = 8.0 Hz, 1H), 3.95 (s, 1H), 3.88 (t, *J* = 4.0 Hz, 1H), 3.81 (s, 3H), 3.74 (dd, *J*<sub>1</sub> = *J*<sub>2</sub> = 4.0 Hz, 1H), 3.26 (d, *J* = 8.0 Hz, 1H), 2.55 (t, *J* = 8.0 Hz, 1H), 2.35-2.15 (m, 3H), 1.86 (d, *J* = 20.0 Hz, 1H), 1.01 (3H), 0.94 (s, 3H); <sup>13</sup>C NMR (100 MHz, CDCl<sub>3</sub>) δ 194.0, 159.0, 153.8, 139.1, 136.8, 136.5, 135.2, 128.7, 128.6, 127.9, 127.7, 127.6, 114.7, 106.8, 87.9, 83.1, 82.4, 80.0, 58.9, 57.5, 55.4, 51.5, 50.0, 45.7, 41.7, 39.0, 32.8, 29.8, 26.1, 24.7, three carbons missing in the aromatic region. IR (KBr) ν 3022, 2960, 1636, 1585, 1538, 1389, 1241, 735 cm<sup>-1</sup>. HRMS (ESI) calcd for C<sub>39</sub>H<sub>40</sub>N<sub>5</sub>O<sub>6</sub> [M+H]<sup>+</sup> 674.2973, found 674.2974.

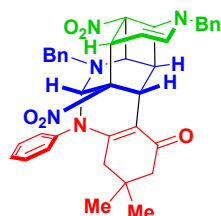

7,11-dibenzyl-3,3-dimethyl-7b,13-dinitro-5-phenyl-3,4,5,6,7,7a,7b,8,11,11a,11b,12-dodecahydro-6,8,12-(epimethanetriyl)benzo[*d*]pyrido[3',2':3,4]cyclobuta[1,2-*g*][1,3]diazocin-1(2*H*)-one (**3d**)

Yellow solid obtained by filtration of the precipitate; 88.1 mg, 91% yield; dr > 20:1; reaction time = 5 min; mp 221.4-222.9 °C; <sup>1</sup>H NMR (400 MHz, CDCl<sub>3</sub>) δ 7.42-7.35 (m, 7H), 7.28-7.24 (m, 4H),

7.11 (d,  $J = 4.0$  Hz, 4H), 6.46 (d,  $J = 8.0$  Hz, 1H), 5.31 (d,  $J = 4.0$  Hz, 1H), 4.38 (q,  $J = 12.0$  Hz, 2H), 4.20 (d,  $J = 12.0$  Hz, 1H), 4.09 (t,  $J = 8.0$  Hz, 1H), 3.96 (s, 1H), 3.88-3.81 (m, 2H), 3.75 (dd,  $J_1 = J_2 = 4.0$  Hz, 1H), 3.27 (d,  $J = 8.0$  Hz, 1H), 2.56 (t,  $J = 8.0$  Hz, 1H), 2.35-2.19 (m, 3H), 1.87 (d,  $J = 16.0$  Hz, 1H), 1.01 (s, 3H), 0.94 (s, 3H);  $^{13}\text{C}$  NMR (100 MHz,  $\text{CDCl}_3$ )  $\delta$  194.1, 153.3, 142.6, 139.2, 136.8, 136.6, 128.7, 128.2, 128.0 (2C), 127.8, 127.7, 107.4, 87.9, 83.2, 82.5, 80.0, 58.9, 57.6, 55.5, 51.5, 50.1, 45.8, 41.9, 39.1, 33.0, 29.8, 26.2, 24.8, two carbons missing in the aromatic region. IR (KBr)  $\nu$  3033, 2950, 2869, 1582, 1539, 1392, 745  $\text{cm}^{-1}$ . HRMS (ESI) calcd for  $\text{C}_{38}\text{H}_{38}\text{N}_5\text{O}_5$   $[\text{M}+\text{H}]^+$  644.2868, found 644.2864.

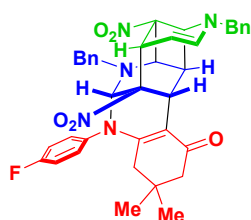

7,11-dibenzyl-5-(4-fluorophenyl)-3,3-dimethyl-7b,13-dinitro-3,4,5,6,7,7a,7b,8,11,11a,11b,12-dodecahydro-6,8,12-(epimethanetriyl)benzo[*d*]pyrido[3',2':3,4]cyclobuta[1,2-*g*][1,3]diazocin-1(2*H*)-one (**3e**)

Yellow solid obtained by filtration of the precipitate; 85.7 mg, 86% yield; dr > 20:1; reaction time = 5 min; mp 223.2-224.3 °C;  $^1\text{H}$  NMR (400 MHz,  $\text{CDCl}_3$ )  $\delta$  7.42-7.35 (m, 4H), 7.29-7.26 (m, 4H), 7.11-7.05 (m, 6H), 6.47 (d,  $J = 8.0$  Hz, 1H), 5.26 (s, 1H), 4.39 (q,  $J = 16.0$  Hz, 2H), 4.25 (d,  $J = 16.0$  Hz, 1H), 4.08 (t,  $J = 8.0$  Hz, 1H), 3.96 (s, 1H), 3.87-3.82 (m, 2H), 3.75 (dd,  $J_1 = J_2 = 4.0$  Hz, 1H), 3.28 (d,  $J = 8.0$  Hz, 1H), 2.56 (t,  $J = 8.0$  Hz, 1H), 2.28 (q,  $J = 16.0$  Hz, 2H), 2.16 (d,  $J = 16.0$  Hz, 1H), 1.83 (d,  $J = 16.0$  Hz, 1H), 1.01 (s, 3H), 0.95 (s, 3H);  $^{13}\text{C}$  NMR (100 MHz,  $\text{CDCl}_3$ )  $\delta$  194.1, 161.9 (d,  $J = 248.0$  Hz, 1C), 153.1, 139.2, 138.6 (d,  $J = 4.0$  Hz, 1C), 136.6 (d,  $J = 20.0$  Hz, 1C), 128.8, 128.7, 128.0, 127.9, 127.8 (2C), 107.6, 87.9, 83.2, 82.4, 80.2, 59.1, 57.7, 55.6, 51.6, 50.1, 45.8, 41.9, 39.2, 33.0, 29.8, 26.2, 24.8, two carbons missing in the aromatic region. IR (KBr)  $\nu$  3030, 2956, 2871, 1591, 1540, 1392, 749  $\text{cm}^{-1}$ . HRMS (ESI) calcd for  $\text{C}_{38}\text{H}_{37}\text{FN}_5\text{O}_5$   $[\text{M}+\text{H}]^+$  6462.2773, found 662.2772.

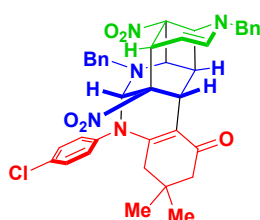

7,11-dibenzyl-5-(4-chlorophenyl)-3,3-dimethyl-7b,13-dinitro-3,4,5,6,7,7a,7b,8,11,11a,11b,12-dodecahydro-6,8,12-(epimethanetriyl)benzo[*d*]pyrido[3',2':3,4]cyclobuta[1,2-*g*][1,3]diazocin-1(2*H*)-one (**3f**)

Yellow solid obtained by filtration of the precipitate; 81.8 mg, 80% yield; dr > 20:1; reaction time = 5 min; mp 217.6-218.3 °C; <sup>1</sup>H NMR (400 MHz, CDCl<sub>3</sub>), δ 7.42-7.33 (m, 6H), 7.29-7.25 (m, 4H), 7.10-7.08 (m, 2H), 7.00 (d, *J* = 8.0 Hz, 2H), 6.47 (d, *J* = 8.0 Hz, 1H), 5.26 (d, *J* = 4.0 Hz, 1H), 4.39 (q, *J* = 16.0 Hz, 2H), 4.24 (d, *J* = 16.0 Hz, 1H), 4.08 (t, *J* = 8.0 Hz, 1H), 3.95 (s, 1H), 3.87-3.81 (m, 2H), 3.75 (dd, *J*<sub>1</sub> = *J*<sub>2</sub> = 4.0 Hz, 1H), 3.28 (d, *J* = 4.0 Hz, 1H), 2.56 (t, *J* = 8.0 Hz, 1H), 2.29 (q, *J* = 16.0 Hz, 2H), 2.17 (d, *J* = 16.0 Hz, 1H), 1.84 (d, *J* = 16.0 Hz, 1H), 1.02 (s, 3H), 0.94 (s, 3H); <sup>13</sup>C NMR (100 MHz, CDCl<sub>3</sub>) δ 194.2, 152.7, 141.1, 139.2, 136.7, 136.5, 134.1, 128.8 (2C), 128.0, 127.9 (2C), 127.8, 108.0, 87.9, 83.2, 82.4, 80.2, 59.1, 57.7, 55.7, 51.6, 50.1, 45.8, 41.9, 39.2, 33.1, 29.8, 26.2, 24.9, one carbon missing in the aromatic region. IR (KBr) ν 3031, 2952, 2870, 1592, 1540, 1390, 742 cm<sup>-1</sup>. HRMS (ESI) calcd for C<sub>38</sub>H<sub>37</sub>ClN<sub>5</sub>O<sub>5</sub> [M+H]<sup>+</sup> 678.2478, found 678.2469.

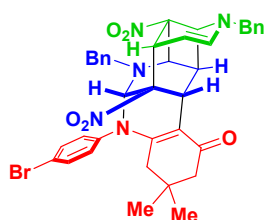

7,11-dibenzyl-5-(4-bromophenyl)-3,3-dimethyl-7b,13-dinitro-3,4,5,6,7,7a,7b,8,11,11a,11b,12-dodecahydro-6,8,12-(epimethanetriyl)benzo[*d*]pyrido[3',2':3,4]cyclobuta[1,2-*g*][1,3]diazocin-1(2*H*)-one (**3g**)

Yellow solid obtained by filtration of the precipitate; 87.1 mg, 80% yield; dr > 20:1; reaction time = 5 min; mp 220.8-222.7 °C; <sup>1</sup>H NMR (400 MHz, CDCl<sub>3</sub>), δ 7.49 (d, *J* = 8.0 Hz, 2H), 7.42-7.35 (m, 4H), 7.25 (s, 4H), 7.10 (s, 2H), 6.93 (d, *J* = 8.0 Hz, 2H), 6.47 (d, *J* = 8.0 Hz, 1H), 5.26 (s, 1H), 4.39 (q, *J* = 16.0 Hz, 2H), 4.24 (d, *J* = 16.0 Hz, 1H), 4.08 (t, *J* = 8.0 Hz, 1H), 3.95 (s, 1H), 3.84-3.74 (m, 3H), 3.28 (d, *J* = 4.0 Hz, 1H), 2.55 (t, *J* = 8.0 Hz, 1H), 2.28 (q, *J* = 16.0 Hz, 2H), 2.16 (d, *J* = 16.0 Hz, 1H), 1.85 (d, *J* = 16.0 Hz, 1H), 1.02 (s, 3H), 0.94 (s, 3H); <sup>13</sup>C NMR (100 MHz, CDCl<sub>3</sub>) δ 194.2, 152.6, 141.6, 139.2, 136.7, 136.5, 133.1, 128.8, 128.7, 128.0, 127.9 (2C), 127.8, 122.0, 108.1, 87.9, 83.1, 82.4, 80.2, 59.1, 57.7, 55.7, 51.6, 50.1, 45.7, 41.9, 39.2, 33.0, 29.8, 26.2, 24.9. IR (KBr) ν 3030, 2955, 2870, 1593, 1540, 1390, 737 cm<sup>-1</sup>. HRMS (ESI) calcd for

C<sub>38</sub>H<sub>37</sub>BrN<sub>5</sub>O<sub>5</sub> [M+H]<sup>+</sup> 722.1973, found 722.1976.

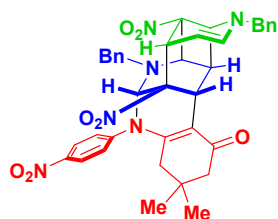

7,11-dibenzyl-3,3-dimethyl-7b,13-dinitro-5-(4-nitrophenyl)-3,4,5,6,7,7a,7b,8,11,11a,11b,12-dodecahydro-6,8,12-(epimethanetriyl)benzo[*d*]pyrido[3',2':3,4]cyclobuta[1,2-*g*][1,3]diazocin-1(2*H*)-one (**3h**)

Yellow solid obtained by filtration of the precipitate; 75.6 mg, 73% yield; dr > 20:1; reaction time = 5 min; mp 204.5-205.7 °C; <sup>1</sup>H NMR (400 MHz, CDCl<sub>3</sub>), δ 8.20 (d, *J* = 12.0 Hz, 2H), 7.43-7.36 (m, 4H), 7.29-7.25 (m, 4H), 7.14-7.08 (m, 4H), 6.49 (d, *J* = 8.0 Hz, 1H), 5.35 (s, 1H), 4.40 (q, *J* = 16.0 Hz, 2H), 4.29 (d, *J* = 12.0 Hz, 1H), 4.08 (t, *J* = 8.0 Hz, 1H), 3.96 (s, 1H), 3.85 (dd, *J*<sub>1</sub> = 16.0 Hz, *J*<sub>2</sub> = 4.0 Hz, 2H), 3.77 (dd, *J*<sub>1</sub> = *J*<sub>2</sub> = 4.0 Hz, 1H), 3.35 (d, *J* = 8.0 Hz, 1H), 2.58 (t, *J* = 8.0 Hz, 1H), 2.34 (t, *J* = 16.0 Hz, 2H), 2.16 (d, *J* = 16.0 Hz, 1H), 1.99 (d, *J* = 16.0 Hz, 1H), 1.04 (s, 3H), 0.98 (s, 3H); <sup>13</sup>C NMR (100 MHz, CDCl<sub>3</sub>) δ 194.5, 151.3, 148.1, 146.3, 139.3, 136.5, 136.4, 128.9, 128.8, 128.1, 128.0, 127.8 (2C), 125.3, 110.7, 87.7, 83.0, 82.2, 80.7, 59.1, 57.8, 56.2, 51.5, 50.3, 45.6, 42.2, 39.4, 33.4, 29.4, 26.5, 25.1. IR (KBr) ν 3029, 2952, 2867, 1590, 1537, 1345, 745 cm<sup>-1</sup>. HRMS (ESI) calcd for C<sub>38</sub>H<sub>37</sub>N<sub>6</sub>O<sub>7</sub> [M+H]<sup>+</sup> 689.2718, found 689.2718.

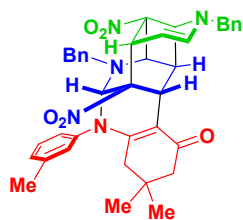

7,11-dibenzyl-3,3-dimethyl-7b,13-dinitro-5-(*m*-tolyl)-3,4,5,6,7,7a,7b,8,11,11a,11b,12-dodecahydro-6,8,12-(epimethanetriyl)benzo[*d*]pyrido[3',2':3,4]cyclobuta[1,2-*g*][1,3]diazocin-1(2*H*)-one (**3i**)

Yellow solid obtained by column chromatography (petroleum ether/ethyl acetate = 5:1); 85.7 mg, 87% yield; dr > 20:1; reaction time = 5 min; mp 193.1-194.0 °C; <sup>1</sup>H NMR (400 MHz, CDCl<sub>3</sub>), δ 7.43-7.34 (m, 4H), 7.29-7.25 (m, 6H), 7.12 (dd, *J*<sub>1</sub> = 12.0 Hz, *J*<sub>2</sub> = 4.0 Hz, 3H), 6.88 (s, 2H), 6.47 (d, *J* = 8.0 Hz, 1H), 5.30 (s, 1H), 4.39 (q, *J* = 20.0 Hz, 2H), 4.20 (d, *J* = 16.0 Hz, 1H), 4.09 (t, *J* = 8.0 Hz, 1H), 3.96 (s, 1H), 3.88 (dd, *J*<sub>1</sub> = *J*<sub>2</sub> = 4.0 Hz, 1H), 3.75 (dd, *J*<sub>1</sub> = *J*<sub>2</sub> = 4.0 Hz, 1H), 3.27 (d,

$J = 8.0$  Hz, 1H), 2.56 (t,  $J = 8.0$  Hz, 1H), 2.36-2.19 (m, 6H), 1.86 (d,  $J = 24.0$  Hz, 1H), 1.01 (s, 3H), 0.94 (s, 3H);  $^{13}\text{C}$  NMR (100 MHz,  $\text{CDCl}_3$ )  $\delta$  194.1, 153.5, 142.4, 139.2, 136.8, 136.6, 129.0, 128.7 (2C), 128.0, 127.8, 127.7, 107.1, 87.9, 83.3, 82.5, 79.9, 59.0, 57.6, 55.5, 51.5, 50.1, 45.8, 41.8, 39.1, 33.0, 29.9, 26.1, 24.8, 21.3, five carbons missing in the aromatic region. IR (KBr)  $\nu$  3432, 2952, 2870, 1631, 1584, 1541, 1392, 747  $\text{cm}^{-1}$ . HRMS (ESI) calcd for  $\text{C}_{39}\text{H}_{40}\text{N}_5\text{O}_5$   $[\text{M}+\text{H}]^+$  658.3024, found 658.3032.

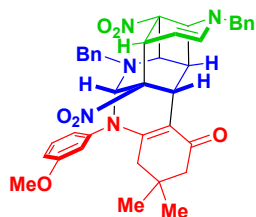

7,11-dibenzyl-5-(3-methoxyphenyl)-3,3-dimethyl-7b,13-dinitro-3,4,5,6,7,7a,7b,8,11,11a,11b,12-dodecahydro-6,8,12-(epimethanetriyl)benzo[*d*]pyrido[3',2':3,4]cyclobuta[1,2-*g*][1,3]diazocin-1(2*H*)-one (**3j**)

Yellow solid obtained by column chromatography (petroleum ether/ethyl acetate = 5:1); 97.5 mg, 97% yield; dr > 20:1; reaction time = 5 min; mp 196.8-197.5 °C;  $^1\text{H}$  NMR (400 MHz,  $\text{CDCl}_3$ ),  $\delta$  7.33-7.25 (m, 3H), 7.19-7.14 (m, 6H), 7.03 (d,  $J = 8.0$  Hz, 2H), 6.78 (dd,  $J_1 = J_2 = 4.0$  Hz, 1H), 6.60-6.52 (m, 2H), 6.36 (d,  $J = 8.0$  Hz, 1H), 5.25 (d,  $J = 4.0$  Hz, 1H), 4.29 (q,  $J = 16.0$  Hz, 2H), 4.15 (d,  $J = 12.0$  Hz, 1H), 3.98 (t,  $J = 8.0$  Hz, 1H), 3.87 (s, 1H), 3.80-3.76 (m, 2H), 3.66-3.62 (m, 4H), 3.18 (d,  $J = 4.0$  Hz, 1H), 2.47 (t,  $J = 8.0$  Hz, 1H), 2.26-2.13 (m, 3H), 1.83 (d,  $J = 16.0$  Hz, 1H), 0.93 (s, 3H), 0.86 (s, 3H);  $^{13}\text{C}$  NMR (100 MHz,  $\text{CDCl}_3$ )  $\delta$  194.1, 153.2, 143.6, 139.1, 136.9, 136.5, 129.2, 128.7, 128.5, 127.9, 127.8, 127.7, 127.6, 114.0, 107.2, 87.8, 83.2, 82.4, 79.9, 58.9, 57.6, 55.5, 55.2, 51.5, 50.1, 45.8, 41.6, 39.1, 32.9, 29.7, 26.1, 24.8, two carbons missing in the aromatic region. IR (KBr)  $\nu$  3030, 2954, 2873, 1582, 1540, 1389, 738  $\text{cm}^{-1}$ . HRMS (ESI) calcd for  $\text{C}_{39}\text{H}_{40}\text{N}_5\text{O}_6$   $[\text{M}+\text{H}]^+$  674.2973, found 674.2974.

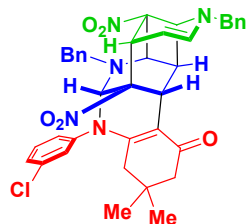

7,11-dibenzyl-5-(3-chlorophenyl)-3,3-dimethyl-7b,13-dinitro-3,4,5,6,7,7a,7b,8,11,11a,11b,12-dodecahydro-6,8,12-(epimethanetriyl)benzo[*d*]pyrido[3',2':3,4]cyclobuta[1,2-*g*][1,3]diazocin-



1(2*H*)-one (**3k**)

Yellow solid obtained by filtration of the precipitate; 85.5 mg, 84% yield; dr > 20:1; reaction time = 5 min; mp 200.6-201.3 °C; <sup>1</sup>H NMR (400 MHz, CDCl<sub>3</sub>) δ 7.42-7.25 (m, 10H), 7.11-7.08 (m, 3H), 6.98 (d, *J* = 4.0 Hz, 1H), 6.47 (d, *J* = 8.0 Hz, 1H), 5.28 (d, *J* = 4.0 Hz, 1H), 4.39 (q, *J* = 16.0 Hz, 2H), 4.22 (d, *J* = 16.0 Hz, 1H), 4.08 (t, *J* = 8.0 Hz, 1H), 3.96 (s, 1H), 3.87 (dd, *J*<sub>1</sub> = *J*<sub>2</sub> = 4.0 Hz, 1H), 3.76 (dd, *J*<sub>1</sub> = 12 Hz, *J*<sub>2</sub> = 4.0 Hz, 2H), 3.29 (d, *J* = 8.0 Hz, 1H), 2.55 (t, *J* = 8.0 Hz, 1H), 2.29 (q, *J* = 16.0 Hz, 2H), 2.20 (d, *J* = 16.0 Hz, 1H), 1.85 (d, *J* = 16.0 Hz, 1H), 1.02 (s, 3H), 0.95 (s, 3H); <sup>13</sup>C NMR (100 MHz, CDCl<sub>3</sub>) δ 194.3, 152.6, 143.6, 139.2, 136.6, 136.5, 130.8, 128.8, 128.7, 128.5, 128.0, 127.9, 127.8, 126.1, 108.3, 87.8, 83.2, 82.4, 80.2, 59.2, 57.7, 55.7, 51.6, 50.1, 45.7, 41.9, 39.1, 33.1, 29.8, 26.1, 24.8, two carbons missing in the aromatic region. IR (KBr) ν 3033, 2951, 2869, 1581, 1539, 1391, 747 cm<sup>-1</sup>. HRMS (ESI) calcd for C<sub>38</sub>H<sub>37</sub>ClN<sub>5</sub>O<sub>5</sub> [M+H]<sup>+</sup> 678.2478, found 678.2482.

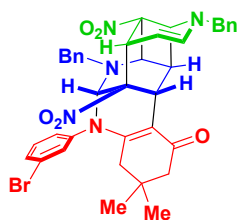

7,11-dibenzyl-5-(3-bromophenyl)-3,3-dimethyl-7b,13-dinitro-3,4,5,6,7,7a,7b,8,11,11a,11b,12-dodecahydro-6,8,12-(epimethanetriyl)benzo[*d*]pyrido[3',2':3,4]cyclobuta[1,2-*g*][1,3]diazocin-1(2*H*)-one (**3l**)

Yellow solid obtained by column chromatography (petroleum ether/ethyl acetate = 5:1); 85.4 mg, 79% yield; dr > 20:1; reaction time = 5 min; mp 185.2-185.9 °C; <sup>1</sup>H NMR (400 MHz, CDCl<sub>3</sub>) δ 7.48 (d, *J* = 8.0 Hz, 1H), 7.39 (q, *J* = 8.0 Hz, 4H), 7.30-7.26 (m, 7H), 7.11-7.02 (m, 3H), 6.47 (d, *J* = 12.0 Hz, 1H), 5.28 (s, 1H), 4.39 (q, *J* = 20.0 Hz, 2H), 4.22 (d, *J* = 20.0 Hz, 1H), 4.08 (t, *J* = 8.0 Hz, 1H), 3.96 (s, 1H), 3.88 (dd, *J*<sub>1</sub> = *J*<sub>2</sub> = 4.0 Hz, 1H), 3.77 (dd, *J*<sub>1</sub> = *J*<sub>2</sub> = 8.0 Hz, 2H), 3.29 (d, *J* = 8.0 Hz, 1H), 2.54 (t, *J* = 8.0 Hz, 1H), 2.30 (d, *J* = 12.0 Hz, 1H), 2.20 (d, *J* = 20.0 Hz, 1H), 1.85 (d, *J* = 20.0 Hz, 1H), 1.02 (s, 3H), 0.95 (s, 3H); <sup>13</sup>C NMR (100 MHz, CDCl<sub>3</sub>) δ 194.3, 152.6, 143.7, 139.3, 136.5 (2C), 131.4, 131.0, 128.8, 128.7, 128.0 (3C), 127.8, 126.6, 108.3, 87.8, 83.2, 82.4, 80.2, 59.2, 57.7, 55.6, 51.6, 50.1, 45.7, 41.9, 39.1, 33.2, 29.9, 26.1, 24.8, one carbon missing in the aromatic region. IR (KBr) ν 3433, 2955, 2872, 1642, 1586, 1541, 1379, 1161, 743 cm<sup>-1</sup>. HRMS (ESI) calcd for C<sub>38</sub>H<sub>37</sub>BrN<sub>5</sub>O<sub>5</sub> [M+H]<sup>+</sup> 722.1973, found 722.1974.

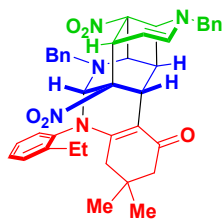

7,11-dibenzyl-5-(2-ethylphenyl)-3,3-dimethyl-7b,13-dinitro-3,4,5,6,7,7a,7b,8,11,11a,11b,12-dodecahydro-6,8,12-(epimethanetriyl)benzo[*d*]pyrido[3',2':3,4]cyclobuta[1,2-*g*][1,3]diazocin-1(2*H*)-one (**3m**)

Yellow solid obtained by column chromatography (petroleum ether/ethyl acetate = 5:1); 77.8 mg, 77% yield; dr = 7:1 (inseparable diastereoisomers); reaction time = 5 min; mp 205.9-207.2 °C; <sup>1</sup>H NMR (400 MHz, CDCl<sub>3</sub>), δ 7.31-7.14 (m, 11H), 7.06 (dd, *J*<sub>1</sub> = *J*<sub>2</sub> = 8.0 Hz, 3H), 6.35 (d, *J* = 4.0 Hz, 1H), 4.88 (s, 1H), 4.28 (q, *J* = 16.0 Hz, 2H), 4.03-3.88 (m, 4H), 3.70 (dd, *J*<sub>1</sub> = *J*<sub>2</sub> = 4.0 Hz, 1H), 3.49 (d, *J* = 12.0 Hz, 1H), 3.20 (d, *J* = 8.0 Hz, 1H), 2.45-2.37 (m, 3H), 2.25-2.09 (m, 3H), 1.51 (d, *J* = 16.0 Hz, 1H), 1.13 (t, *J* = 8.0 Hz, 3H), 0.88 (s, 6H); <sup>13</sup>C NMR (100 MHz, CDCl<sub>3</sub>) δ 194.1, 154.8, 141.9, 139.5, 136.5, 135.9, 130.8, 130.1, 129.1, 128.7, 128.6, 128.1, 127.9, 127.8, 127.7, 126.4, 107.8, 87.6, 83.2, 82.5, 78.1, 60.2, 57.5, 54.8, 51.6, 50.0, 46.1, 42.1, 38.4, 33.2, 30.4, 25.6, 24.2, 23.2, 14.3. IR (KBr) ν 3032, 2960, 2874, 1596, 1542, 1396, 735 cm<sup>-1</sup>. HRMS (ESI) calcd for C<sub>40</sub>H<sub>42</sub>N<sub>5</sub>O<sub>6</sub> [M+H]<sup>+</sup> 672.3181, found 672.3184.

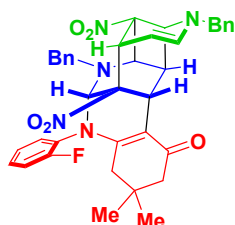

7,11-dibenzyl-5-(2-fluorophenyl)-3,3-dimethyl-7b,13-dinitro-3,4,5,6,7,7a,7b,8,11,11a,11b,12-dodecahydro-6,8,12-(epimethanetriyl)benzo[*d*]pyrido[3',2':3,4]cyclobuta[1,2-*g*][1,3]diazocin-1(2*H*)-one (**3n**)

Yellow solid obtained by filtration of the precipitate; 86.9 mg, 88% yield; dr = 3:1 (inseparable diastereoisomers); reaction time = 5 min; mp 215.2-216.3 °C; <sup>1</sup>H NMR (400 MHz, CDCl<sub>3</sub>), δ 7.41-7.34 (m, 5H), 7.28-7.23 (m, 5H), 7.19-7.10 (m, 4H), 6.46 (d, *J* = 8.0 Hz, 1H), 5.21 (dd, *J*<sub>1</sub> = *J*<sub>2</sub> = 4.0 Hz, 1H), 4.38 (q, *J* = 16.0 Hz, 2H), 4.15-3.70 (m, 6H), 3.27 (dd, *J*<sub>1</sub> = 4.0 Hz, *J*<sub>2</sub> = 8.0 Hz, 1H), 2.57-2.50 (m, 1H), 2.38-2.07 (m, 3H), 1.86 (t, *J* = 16.0 Hz, 1H), 1.00 (d, *J* = 4.0 Hz, 4H), 0.94 (s, 2H); <sup>13</sup>C NMR (100 MHz, CDCl<sub>3</sub>) δ 194.4, 158.5 (d, *J* = 248.0 Hz, 1C), 153.4, 139.2,

136.4 (d,  $J = 32.0$  Hz, 1C), 130.4, 129.6, 128.8, 128.7, 128.6, 128.0, 127.7, 126.0 (d,  $J = 4.0$  Hz, 1C), 124.8 (d,  $J = 5.0$  Hz, 1C), 116.8, 116., 107.2, 88.3, 83.2, 82.4, 80.4, 59.1, 57.7, 54.8, 51.5, 50.1, 45.6, 39.9, 39.1, 32.8, 29.9, 26.0, 24.8. IR (KBr)  $\nu$  3440, 3032, 2952, 2870, 1587, 1542, 1393, 752  $\text{cm}^{-1}$ . HRMS (ESI) calcd for  $\text{C}_{38}\text{H}_{37}\text{FN}_5\text{O}_5$   $[\text{M}+\text{H}]^+$  662.2773, found 662.2775.

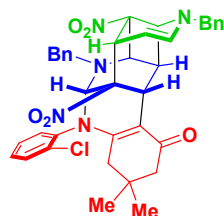

7,11-dibenzyl-5-(2-chlorophenyl)-3,3-dimethyl-7b,13-dinitro-3,4,5,6,7,7a,7b,8,11,11a,11b,12-dodecahydro-6,8,12-(epimethanetriyl)benzo[*d*]pyrido[3',2':3,4]cyclobuta[1,2-*g*][1,3]diazocin-1(2*H*)-one (**3o**)

Yellow solid obtained by column chromatography (petroleum ether/ethyl acetate = 5:1); 76.6 mg, 75% yield; dr = 1.7:1 (separable diastereoisomers); reaction time = 5 min; mp 186.1-186.9 °C (major isomer), 190.2-191.4 °C (minor isomer);  $^1\text{H}$  NMR (400 MHz,  $\text{CDCl}_3$ ) for major isomer  $\delta$  7.47 (dd,  $J_1 = J_2 = 8.0$  Hz, 1H), 7.42-7.33 (m, 6H), 7.28-7.17 (m, 6H), 7.08 (dd,  $J_1 = J_2 = 8.0$  Hz, 1H), 6.46 (d,  $J = 12.0$  Hz, 1H), 5.20 (d,  $J = 4.0$  Hz, 1H), 4.39 (q,  $J = 20.0$  Hz, 2H), 4.15 (d,  $J = 20.0$  Hz, 1H), 4.06 (q,  $J = 8.0$  Hz, 2H), 3.97 (s, 1H), 3.90 (dd,  $J_1 = J_2 = 4.0$  Hz, 1H), 3.73 (dd,  $J_1 = J_2 = 4.0$  Hz, 1H), 3.29 (d,  $J = 12.0$  Hz, 1H), 2.58 (t,  $J = 8.0$  Hz, 1H), 2.42 (dd,  $J_1 = J_2 = 24.0$  Hz, 2H), 2.24 (d,  $J = 20.0$  Hz, 1H), 1.76 (d,  $J = 24.0$  Hz, 1H), 1.01 (s, 3H), 0.92 (s, 3H);  $^{13}\text{C}$  NMR (100 MHz,  $\text{CDCl}_3$ ) for major isomer  $\delta$  194.5, 153.4, 140.6, 139.3, 136.5, 135.9, 133.7, 130.8, 130.0 (2C), 129.1, 128.7, 128.6 (2C), 128.0, 127.8, 127.7, 106.5, 88.3, 83.2, 82.4, 80.9, 59.5, 57.6, 54.6, 51.4, 50.1, 45.5, 39.6, 38.8, 32.7, 29.9, 26.1, 24.6.  $^1\text{H}$  NMR (400 MHz,  $\text{CDCl}_3$ ) for minor isomer  $\delta$  7.53 (dd,  $J_1 = J_2 = 4.0$  Hz, 1H), 7.43-7.33 (m, 6H), 7.31-7.24 (m, 6H), 7.15 (dd,  $J_1 = J_2 = 4.0$  Hz, 1H), 6.47 (d,  $J = 12.0$  Hz, 1H), 5.05 (d,  $J = 4.0$  Hz, 1H), 4.38 (q,  $J = 20.0$  Hz, 2H), 4.19 (d,  $J = 20.0$  Hz, 1H), 4.12 (t,  $J = 12.0$  Hz, 1H), 4.01 (dd,  $J_1 = J_2 = 4.0$  Hz, 1H), 3.96 (s, 1H), 3.78 (dd,  $J_1 = 4.0$  Hz,  $J_2 = 20.0$  Hz, 2H), 3.30 (d,  $J = 8.0$  Hz, 1H), 2.53 (t,  $J = 8.0$  Hz, 1H), 2.30 (s, 2H), 2.09 (d,  $J = 24.0$  Hz, 1H), 1.65 (d,  $J = 24.0$  Hz, 1H), 1.02 (s, 3H), 0.99 (s, 3H);  $^{13}\text{C}$  NMR (100 MHz,  $\text{CDCl}_3$ ) for minor isomer  $\delta$  194.3, 153.5, 139.5, 138.8, 136.6, 136.1, 133.8, 131.7, 131.1, 130.2, 128.9, 128.7, 128.0 (2C), 127.9, 127.8, 127.5, 107.8, 87.1, 83.1, 82.8, 77.9, 60.1, 57.6, 54.9, 51.7, 50.0, 46.3, 41.7, 38.5, 33.1, 30.1, 26.0, 24.2. IR (KBr) for major isomer  $\nu$  3029, 2956, 2869, 1587,

1538, 1386, 739  $\text{cm}^{-1}$ . IR (KBr) for minor isomer  $\nu$  3032, 2954, 2869, 1600, 1543, 1391, 741  $\text{cm}^{-1}$ .

HRMS (ESI) calcd for  $\text{C}_{38}\text{H}_{37}\text{ClN}_5\text{O}_5$   $[\text{M}+\text{H}]^+$  678.2478, found 678.2479.

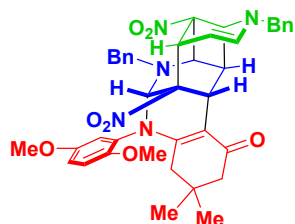

7,11-dibenzyl-5-(2,5-dimethoxyphenyl)-3,3-dimethyl-7b,13-dinitro-

3,4,5,6,7,7a,7b,8,11,11a,11b,12-dodecahydro-6,8,12-

(epimethanetriyl)benzo[*d*]pyrido[3',2':3,4]cyclobuta[1,2-*g*][1,3]diazocin-1(2*H*)-one (**3p**)

Yellow solid obtained by column chromatography (petroleum ether/ethyl acetate = 5:1); 54.1 mg, 51% yield; dr = 1.2:1 (inseparable diastereoisomers); reaction time = 5 min; mp 187.4-189.1 °C; <sup>1</sup>H NMR (400 MHz, CDCl<sub>3</sub>),  $\delta$  7.41 (d,  $J$  = 8.0 Hz, 2H), 7.36 (t,  $J$  = 8.0 Hz, 2H), 7.30-7.16 (m, 6H), 6.89-6.80 (m, 2H), 6.61 (dd,  $J_1 = J_2 = 4.0$  Hz, 1H), 6.44 (dd,  $J_1 = J_2 = 4.0$  Hz, 1H), 5.15 (dd,  $J_1 = J_2 = 4.0$  Hz, 1H), 4.44-4.33 (m, 2H), 4.18-4.05 (m, 2H), 3.93-3.88 (m, 2H), 3.84-3.68 (m, 4H), 3.54 (d,  $J$  = 28.0 Hz, 3H), 3.26 (dd,  $J_1 = J_2 = 8.0$  Hz, 1H), 2.57 (t,  $J$  = 8.0 Hz, 1H), 2.37-2.08 (m, 3H), 1.87 (q,  $J$  = 16.0 Hz, 2H), 1.01 (s, 3H), 0.96 (d,  $J$  = 16.0 Hz, 3H); <sup>13</sup>C NMR (100 MHz, CDCl<sub>3</sub>)  $\delta$  194.2, 154.4, 153.2, 149.5, 139.2, 137.2, 136.7, 131.0, 128.7, 128.4, 128.0, 127.7, 127.5, 115.4, 114.9, 112.8, 106.6, 87.0, 83.2, 82.8, 79.0, 59.2, 57.5, 55.7, 55.5, 55.1, 51.6, 50.2, 46.3, 41.2, 39.1, 32.8, 29.7, 26.6, 24.4. IR (KBr)  $\nu$  3029, 2954, 2872, 1582, 1541, 1392, 733  $\text{cm}^{-1}$ . HRMS (ESI) calcd for  $\text{C}_{40}\text{H}_{42}\text{N}_5\text{O}_7$   $[\text{M}+\text{H}]^+$  704.3079, found 704.3073.

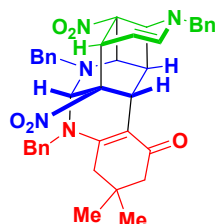

5,7,11-tribenzyl-3,3-dimethyl-7b,13-dinitro-3,4,5,6,7,7a,7b,8,11,11a,11b,12-dodecahydro-6,8,12-

(epimethanetriyl)benzo[*d*]pyrido[3',2':3,4]cyclobuta[1,2-*g*][1,3]diazocin-1(2*H*)-one (**3q**)

Yellow solid obtained by column chromatography (petroleum ether/ethyl acetate = 5:1); 30.3 mg, 31% yield; dr > 20:1; reaction time = 5 min; mp 187.3-188.5 °C; <sup>1</sup>H NMR (400 MHz, CDCl<sub>3</sub>),  $\delta$  7.41-7.35 (m, 4H), 7.30-7.24 (m, 8H), 7.11 (dd,  $J_1 = J_2 = 4.0$  Hz, 2H), 7.06 (d,  $J$  = 8.0 Hz, 2H), 6.43 (d,  $J$  = 4.0 Hz, 1H), 4.93 (d,  $J$  = 4.0 Hz, 1H), 4.43-4.27 (m, 4H), 4.16 (d,  $J$  = 16.0 Hz, 1H),

4.02 (t,  $J = 8.0$  Hz, 1H), 3.87 (s, 1H), 3.83-3.79 (m, 2H), 3.73 (dd,  $J_1 = J_2 = 4.0$  Hz, 1H), 3.30 (d,  $J = 8.0$  Hz, 1H), 2.58 (t,  $J = 8.0$  Hz, 1H), 2.28-2.21 (m, 3H), 1.08 (s, 3H), 1.02 (s, 3H);  $^{13}\text{C}$  NMR (100 MHz,  $\text{CDCl}_3$ )  $\delta$  193.5, 154.7, 139.0, 137.3, 136.6 (2C), 128.9, 128.7 (2C), 128.0, 127.9 (2C), 127.8, 127.7, 126.5, 107.3, 87.7, 83.2, 82.4, 78.6, 59.2, 57.6, 56.9, 54.0, 51.4, 49.8, 45.9, 40.3, 39.2, 32.8, 28.9, 27.6, 24.9. IR (KBr)  $\nu$  3031, 2954, 2867, 1633, 1578, 1539, 1354, 735  $\text{cm}^{-1}$ . HRMS (ESI) calcd for  $\text{C}_{39}\text{H}_{40}\text{N}_5\text{O}_5$   $[\text{M}+\text{H}]^+$  658.3024, found 658.3023.

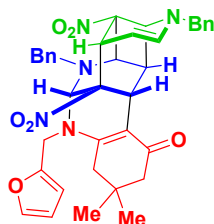

7,11-dibenzyl-5-(furan-2-ylmethyl)-3,3-dimethyl-7b,13-dinitro-3,4,5,6,7,7a,7b,8,11,11a,11b,12-dodecahydro-6,8,12-(epimethanetriyl)benzo[*d*]pyrido[3',2':3,4]cyclobuta[1,2-*g*][1,3]diazocin-1(2*H*)-one (**3r**)

Yellow solid obtained by column chromatography (petroleum ether/ethyl acetate = 5:1); 39.4 mg, 41% yield; dr > 20:1; reaction time = 5 min; mp 197.4-198.7 °C;  $^1\text{H}$  NMR (400 MHz,  $\text{CDCl}_3$ ),  $\delta$  7.41-7.35 (m, 4H), 7.29-7.23 (m, 6H), 7.08 (t,  $J = 4.0$  Hz, 2H), 6.42 (d,  $J = 8.0$  Hz, 1H), 6.27 (dd,  $J_1 = J_2 = 4.0$  Hz, 1H), 6.18 (d,  $J = 4.0$  Hz, 1H), 4.99 (d,  $J = 4.0$  Hz, 1H), 4.37 (q,  $J = 16.0$  Hz, 2H), 4.11 (s, 2H), 4.02 (t,  $J = 8.0$  Hz, 1H), 3.81 (dd,  $J_1 = J_2 = 4.0$  Hz, 2H), 3.71 (dd,  $J_1 = 16.0$  Hz,  $J_2 = 4.0$  Hz, 2H), 3.27 (d,  $J = 8.0$  Hz, 1H), 2.54 (t,  $J = 8.0$  Hz, 1H), 2.46 (d,  $J = 16.0$  Hz, 1H), 2.33 (d,  $J = 16.0$  Hz, 1H), 2.28 (s, 2H), 1.11 (s, 3H), 1.07 (s, 3H);  $^{13}\text{C}$  NMR (100 MHz,  $\text{CDCl}_3$ )  $\delta$  193.6, 154.2, 149.7, 142.9, 138.9, 137.7, 136.7, 128.7, 128.6, 128.1, 128.0, 127.7 (2C), 110.6, 108.6, 107.4, 87.5, 83.3, 82.4, 78.3, 58.5, 57.6, 57.2, 51.3, 49.8, 47.1, 45.8, 40.1, 39.4, 32.8, 28.5, 28.1, 25.0. IR (KBr)  $\nu$  3438, 2951, 2874, 1629, 1572, 1538, 1356, 737  $\text{cm}^{-1}$ . HRMS (ESI) calcd for  $\text{C}_{37}\text{H}_{38}\text{N}_5\text{O}_6$   $[\text{M}+\text{H}]^+$  648.2817, found 648.2814.

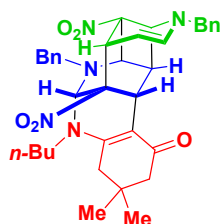

7,11-dibenzyl-5-butyl-3,3-dimethyl-7b,13-dinitro-3,4,5,6,7,7a,7b,8,11,11a,11b,12-dodecahydro-6,8,12-(epimethanetriyl)benzo[*d*]pyrido[3',2':3,4]cyclobuta[1,2-*g*][1,3]diazocin-1(2*H*)-one (**3s**)

Yellow solid obtained by column chromatography (petroleum ether/ethyl acetate = 5:1); 22.4 mg, 24% yield; dr > 20:1; reaction time = 5 min; mp 173.6-175.1 °C; <sup>1</sup>H NMR (400 MHz, CDCl<sub>3</sub>) δ 7.39 (q, *J* = 8.0 Hz, 4H), 7.30-7.27 (m, 5H), 7.14 (t, *J* = 4.0 Hz, 2H), 6.43 (d, *J* = 12.0 Hz, 1H), 4.93 (d, *J* = 4.0 Hz, 1H), 4.39-4.29 (m, 3H), 4.13 (d, *J* = 20.0 Hz, 1H), 4.05 (t, *J* = 8.0 Hz, 1H), 3.85 (dd, *J*<sub>1</sub> = *J*<sub>2</sub> = 4.0 Hz, 1H), 3.80 (s, 1H), 3.74 (dd, *J*<sub>1</sub> = *J*<sub>2</sub> = 4.0 Hz, 1H), 3.33 (d, *J* = 8.0 Hz, 1H), 3.12-3.01 (m, 1H), 2.74-2.64 (m, 1H), 2.58 (t, *J* = 8.0 Hz, 1H), 2.26-2.16 (m, 5H), 1.41-1.33 (m, 1H), 1.28-1.22 (m, 1H), 1.10 (s, 3H), 1.03 (s, 3H), 0.85 (t, *J* = 8.0 Hz, 3H); <sup>13</sup>C NMR (100 MHz, CDCl<sub>3</sub>) δ 193.1, 154.4, 139.0, 137.8, 136.7, 128.7 (2C), 128.0, 127.9, 127.8, 127.7, 106.4, 87.8, 83.4, 82.5, 78.7, 59.6, 58.0, 57.5, 51.3, 50.2, 49.8, 46.1, 39.7, 39.4, 32.5, 31.4, 29.5, 27.1, 24.9, 19.7, 13.5. IR (KBr) ν 3431, 3031, 2958, 2868, 1628, 1575, 1539, 1361, 739 cm<sup>-1</sup>. HRMS (ESI) calcd for C<sub>36</sub>H<sub>42</sub>N<sub>5</sub>O<sub>5</sub> [M+H]<sup>+</sup> 624.3181, found 624.3184.

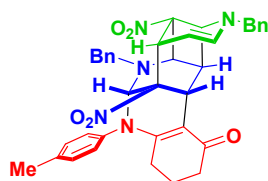

7,11-dibenzyl-7b,13-dinitro-5-(*p*-tolyl)-3,4,5,6,7,7a,7b,8,11,11a,11b,12-dodecahydro-6,8,12-(epimethanetriyl)benzo[*d*]pyrido[3',2':3,4]cyclobuta[1,2-*g*][1,3]diazocin-1(2*H*)-one (**3t**)

Yellow solid obtained by column chromatography (petroleum ether/ethyl acetate = 5:1); 87.7 mg, 93% yield; dr > 20:1; reaction time = 5 min; mp 223.7-225.2 °C; <sup>1</sup>H NMR (400 MHz, CDCl<sub>3</sub>) δ 7.41 (d, *J* = 8.0 Hz, 2H), 7.36 (t, *J* = 8.0 Hz, 2H), 7.28-7.23 (m, 5H), 7.16 (d, *J* = 8.0 Hz, 2H), 7.11 (dd, *J*<sub>1</sub> = *J*<sub>2</sub> = 4.0 Hz, 2H), 6.99 (d, *J* = 8.0 Hz, 2H), 6.45 (d, *J* = 4.0 Hz, 1H), 5.27 (d, *J* = 4.0 Hz, 1H), 4.38 (q, *J* = 12.0 Hz, 2H), 4.19 (d, *J* = 12.0 Hz, 1H), 4.06 (t, *J* = 8.0 Hz, 1H), 3.95 (s, 1H), 3.86-3.82 (m, 2H), 3.74 (dd, *J*<sub>1</sub> = *J*<sub>2</sub> = 4.0 Hz, 1H), 3.26 (d, *J* = 8.0 Hz, 1H), 2.59 (t, *J* = 8.0 Hz, 1H), 2.43-2.37 (m, 2H), 2.34 (s, 3H), 2.28-2.24 (m, 1H), 1.90-1.84 (m, 2H); <sup>13</sup>C NMR (100 MHz, CDCl<sub>3</sub>) δ 194.3, 155.3, 139.9, 139.1, 138.3, 136.8, 136.6, 130.3, 128.7 (2C), 128.0, 127.9, 127.8, 127.7, 107.9, 88.0, 83.2, 82.5, 79.4, 58.9, 57.6, 55.5, 51.5, 45.8, 39.1, 36.5, 28.4, 24.9, 21.8, 21.0, one carbon missing in the aromatic region. IR (KBr) ν 3056, 2929, 2863, 1633, 1584, 1536, 1370, 1165, 735 cm<sup>-1</sup>. HRMS (ESI) calcd for C<sub>37</sub>H<sub>36</sub>N<sub>5</sub>O<sub>5</sub> [M+H]<sup>+</sup> 630.2711, found 630.2714.

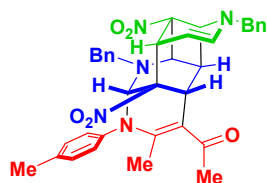

1-(1,7-dibenzyl-4-methyl-10a,11-dinitro-3-(*p*-tolyl)-1,2,3,6,6a,6b,7,10,10a,10b-decahydro-2,6,10-(epimethanetriyl)pyrido[2',3':3,4]cyclobuta[1,2-*d*][1,3]diazocin-5-yl)ethan-1-one (**3u**)

Yellow solid obtained by column chromatography (petroleum ether/ethyl acetate = 5:1); 39.1 mg, 42% yield; dr > 20:1; reaction time = 5 min; mp 185.5-187.1 °C; <sup>1</sup>H NMR (400 MHz, CDCl<sub>3</sub>), δ 7.34-7.27 (m, 8H), 7.13-7.10 (m, 4H), 6.98 (br, 2H), 6.50 (d, *J* = 8.0 Hz, 1H), 5.27 (d, *J* = 4.0 Hz, 1H), 4.30 (s, 2H), 4.12 (dd, *J*<sub>1</sub> = 16.0 Hz, *J*<sub>2</sub> = 4.0 Hz, 2H), 3.88-3.78 (m, 4H), 3.27 (d, *J* = 12.0 Hz, 1H), 2.40 (t, *J* = 8.0 Hz, 1H), 2.33 (s, 3H), 2.23 (s, 3H), 2.06 (s, 3H); <sup>13</sup>C NMR (100 MHz, CDCl<sub>3</sub>) δ 195.8, 150.1, 141.0, 139.0, 137.9, 136.7 (2C), 129.3, 128.8, 128.7, 128.6, 128.2, 128.1, 128.0, 127.8, 109.1, 87.5, 83.2, 82.8, 78.9, 58.9, 58.4, 54.8, 52.3, 46.9, 38.9, 30.6, 28.3, 21.0, 20.6. IR (KBr) ν 3425, 2925, 1639, 1544, 1355, 746 cm<sup>-1</sup>. HRMS (ESI) calcd for C<sub>36</sub>H<sub>36</sub>N<sub>5</sub>O<sub>5</sub> [M+H]<sup>+</sup> 618.2711, found 618.2714.

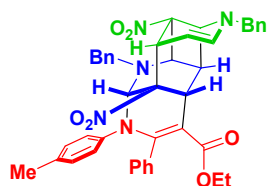

ethyl 1,7-dibenzyl-10a,11-dinitro-4-phenyl-3-(*p*-tolyl)-1,2,3,6,6a,6b,7,10,10a,10b-decahydro-2,6,10-(epimethanetriyl)pyrido[2',3':3,4]cyclobuta[1,2-*d*][1,3]diazocine-5-carboxylate (**3v**)

Yellow solid obtained by column chromatography (petroleum ether/ethyl acetate = 5:1); 45.5 mg, 43% yield; dr > 20:1; reaction time = 5 min; mp 169.8-170.4 °C; <sup>1</sup>H NMR (400 MHz, CDCl<sub>3</sub>), δ 7.35-7.25 (m, 10H), 7.07 (d, *J* = 12.0 Hz, 5H), 6.81 (d, *J* = 12.0 Hz, 2H), 6.63 (d, *J* = 12.0 Hz, 2H), 6.46 (d, *J* = 12.0 Hz, 1H), 5.36 (s, 1H), 4.36 (q, *J* = 8.0 Hz, 4H), 4.12 (t, *J* = 8.0 Hz, 1H), 4.03 (s, 1H), 3.96-3.88 (m, 3H), 3.78 (dd, *J*<sub>1</sub> = *J*<sub>2</sub> = 4.0 Hz, 1H), 3.39 (d, *J* = 12.0 Hz, 1H), 2.61 (t, *J* = 8.0 Hz, 1H), 2.13 (s, 3H), 0.85 (t, *J* = 8.0 Hz, 3H); <sup>13</sup>C NMR (100 MHz, CDCl<sub>3</sub>) δ 167.4, 150.2, 141.7, 138.6, 137.5, 136.8, 136.7, 135.9, 129.7, 129.5, 128.8, 128.7, 128.0, 127.9, 127.8, 127.7, 127.4, 127.2, 115.5, 103.3, 87.6, 83.2, 83.0, 80.0, 59.6, 57.8, 57.7, 56.0, 51.6, 46.4, 39.4, 28.6, 20.8, 13.8. IR (KBr) ν 3429, 3032, 2978, 1668, 1539, 1370, 1230, 1117, 746 cm<sup>-1</sup>. HRMS (ESI) calcd for C<sub>42</sub>H<sub>40</sub>N<sub>5</sub>O<sub>6</sub> [M+H]<sup>+</sup> 710.2973, found 710.2975.

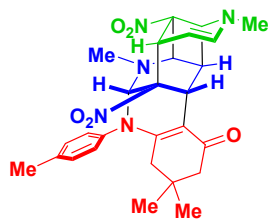

3,3,7,11-tetramethyl-7b,13-dinitro-5-(*p*-tolyl)-3,4,5,6,7,7a,7b,8,11,11a,11b,12-dodecahydro-6,8,12-(epimethanetriyl)benzo[*d*]pyrido[3',2':3,4]cyclobuta[1,2-*g*][1,3]diazocin-1(2*H*)-one (**3w**)

Yellow solid obtained by column chromatography (petroleum ether/ethyl acetate = 5:1); 53.5 mg, 71% yield; dr > 20:1; reaction time = 5 min; mp 209.8-211.5 °C; <sup>1</sup>H NMR (400 MHz, CDCl<sub>3</sub>), δ 7.20 (d, *J* = 8.0 Hz, 2H), 7.05 (s, 1H), 6.90 (s, 1H), 6.26 (d, *J* = 8.0 Hz, 1H), 4.96 (d, *J* = 4.0 Hz, 1H), 3.96-3.91 (m, 2H), 3.76-3.73 (m, 2H), 3.44 (d, *J* = 8.0 Hz, 1H), 3.02 (s, 3H), 2.81 (t, *J* = 8.0 Hz, 1H), 2.63 (s, 3H), 2.38 (s, 3H), 2.26-2.13 (m, 3H), 1.77 (d, *J* = 16.0 Hz, 1H), 0.93 (s, 3H), 0.88 (s, 3H); <sup>13</sup>C NMR (100 MHz, CDCl<sub>3</sub>) δ 194.2, 153.9, 140.1, 139.2, 138.3, 106.7, 87.6, 83.6, 81.2, 81.0, 60.3, 53.2, 50.0, 45.6, 44.0, 41.6, 40.7, 38.5, 32.8, 30.2, 25.7, 24.0, 21.1, three carbons missing in the aromatic region. IR (KBr) ν 3035, 2951, 2871, 1631, 1582, 1539, 1394, 752 cm<sup>-1</sup>. HRMS (ESI) calcd for C<sub>27</sub>H<sub>32</sub>N<sub>5</sub>O<sub>5</sub> [M+H]<sup>+</sup> 506.2398, found 506.2401.

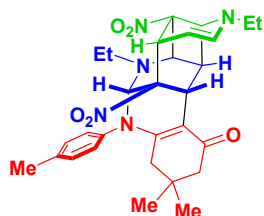

7,11-diethyl-3,3-dimethyl-7b,13-dinitro-5-(*p*-tolyl)-3,4,5,6,7,7a,7b,8,11,11a,11b,12-dodecahydro-6,8,12-(epimethanetriyl)benzo[*d*]pyrido[3',2':3,4]cyclobuta[1,2-*g*][1,3]diazocin-1(2*H*)-one (**3x**)

Yellow solid obtained by column chromatography (petroleum ether/ethyl acetate = 5:1); 58.9 mg, 74% yield; dr > 20:1; reaction time = 5 min; mp 213.5-214.8 °C; <sup>1</sup>H NMR (400 MHz, CDCl<sub>3</sub>), δ 7.18 (d, *J* = 8.0 Hz, 2H), 6.93 (s, 2H), 6.29 (d, *J* = 8.0 Hz, 1H), 5.03 (d, *J* = 4.0 Hz, 1H), 4.02 (dd, *J*<sub>1</sub> = *J*<sub>2</sub> = 4.0 Hz, 1H), 3.94 (t, *J* = 8.0 Hz, 1H), 3.80 (s, 1H), 3.74 (dd, *J*<sub>1</sub> = *J*<sub>2</sub> = 4.0 Hz, 1H), 3.64 (d, *J* = 8.0 Hz, 1H), 3.26-3.16 (m, 2H), 3.05-2.94 (m, 1H), 2.75 (t, *J* = 8.0 Hz, 1H), 2.61-2.53 (m, 1H), 2.37 (s, 3H), 2.24 (d, *J* = 16.0 Hz, 1H), 2.15 (dd, *J*<sub>1</sub> = *J*<sub>2</sub> = 4.0 Hz, 2H), 1.76 (d, *J* = 20.0 Hz, 1H), 1.30 (t, *J* = 8.0 Hz, 3H), 0.92-0.87 (m, 9H); <sup>13</sup>C NMR (100 MHz, CDCl<sub>3</sub>) δ 194.1, 153.6, 140.0, 138.1, 137.9, 130.3, 128.0, 107.0, 88.3, 83.7, 81.0, 79.6, 56.7, 52.9, 50.0, 49.4, 49.2, 47.2, 41.8, 38.2, 32.8, 30.2, 25.7, 24.8, 21.1, 14.9, 13.4, one carbon missing in the aromatic region. IR



(KBr)  $\nu$  3435, 2964, 2873, 1632, 1583, 1539, 1393, 748  $\text{cm}^{-1}$ . HRMS (ESI) calcd for  $\text{C}_{29}\text{H}_{36}\text{N}_5\text{O}_5$   $[\text{M}+\text{H}]^+$  534.2711, found 534.2716.

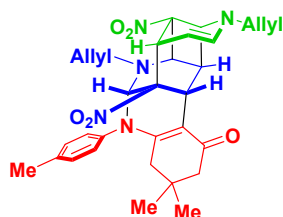

7,11-diallyl-3,3-dimethyl-7b,13-dinitro-5-(*p*-tolyl)-3,4,5,6,7,7a,7b,8,11,11a,11b,12-dodecahydro-6,8,12-(epimethanetriyl)benzo[*d*]pyrido[3',2':3,4]cyclobuta[1,2-*g*][1,3]diazocin-1(2*H*)-one (**3y**)

Yellow solid obtained by column chromatography (petroleum ether/ethyl acetate = 5:1); 66.5 mg, 80% yield; dr > 20:1; reaction time = 5 min; mp 179.6-180.7 °C;  $^1\text{H}$  NMR (400 MHz,  $\text{CDCl}_3$ ),  $\delta$  7.19 (d,  $J = 8.0$  Hz, 2H), 6.95 (br, 2H), 6.31 (d,  $J = 8.0$  Hz, 1H), 6.08-5.96 (m, 1H), 5.65-5.55 (m, 1H), 5.27 (dd,  $J_1 = 16.0$  Hz,  $J_2 = 12.0$  Hz, 2H), 5.10 (d,  $J = 8.0$  Hz, 2H), 4.95 (d,  $J = 16.0$  Hz, 1H), 3.98 (dd,  $J_1 = 8.0$  Hz,  $J_2 = 4.0$  Hz, 2H), 3.84-3.72 (m, 4H), 3.61 (d,  $J = 8.0$  Hz, 1H), 3.54 (dd,  $J_1 = J_2 = 8.0$  Hz, 1H), 3.16 (dd,  $J_1 = J_2 = 4.0$  Hz, 1H), 2.70 (t,  $J = 8.0$  Hz, 1H), 2.37 (s, 3H), 2.25 (d,  $J = 16.0$  Hz, 1H), 2.16 (d,  $J = 16.0$  Hz, 2H), 1.77 (d,  $J = 16.0$  Hz, 1H), 0.94 (s, 3H), 0.87 (s, 3H);  $^{13}\text{C}$  NMR (100 MHz,  $\text{CDCl}_3$ )  $\delta$  194.1, 153.7, 139.9, 138.4, 138.2, 134.3, 133.3, 130.4, 127.9, 127.4, 119.7, 118.3, 106.9, 88.2, 83.6, 81.9, 79.0, 57.9, 57.0, 56.9, 52.3, 50.0, 46.5, 41.7, 38.5, 32.8, 30.1, 25.8, 24.9, 21.1. IR (KBr)  $\nu$  3082, 2955, 2930, 2870, 2214, 1635, 1580, 1393, 729  $\text{cm}^{-1}$ . HRMS (ESI) calcd for  $\text{C}_{31}\text{H}_{36}\text{N}_5\text{O}_5$   $[\text{M}+\text{H}]^+$  558.2711, found 558.2713.

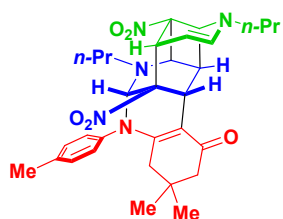

3,3-dimethyl-7b,13-dinitro-7,11-dipropyl-5-(*p*-tolyl)-3,4,5,6,7,7a,7b,8,11,11a,11b,12-dodecahydro-6,8,12-(epimethanetriyl)benzo[*d*]pyrido[3',2':3,4]cyclobuta[1,2-*g*][1,3]diazocin-1(2*H*)-one (**3z**)

Yellow solid obtained by filtration of the precipitate; 74.1 mg, 88% yield; dr > 20:1; reaction time = 5 min; mp 194.2-195.1 °C;  $^1\text{H}$  NMR (400 MHz,  $\text{CDCl}_3$ ),  $\delta$  7.19 (d,  $J = 8.0$  Hz, 2H), 6.93 (s, 2H), 6.30 (d,  $J = 8.0$  Hz, 1H), 5.04 (d,  $J = 4.0$  Hz, 1H), 4.00 (dd,  $J_1 = J_2 = 4.0$  Hz, 1H), 3.92 (t,  $J = 8.0$  Hz, 1H), 3.79 (s, 1H), 3.75 (dd,  $J_1 = J_2 = 4.0$  Hz, 1H), 3.62 (d,  $J = 8.0$  Hz, 1H), 3.17-3.05 (m, 2H),

3.01-2.95 (m, 1H), 2.74 (t,  $J = 8.0$  Hz, 1H), 2.50-2.42 (m, 1H), 2.38 (s, 3H), 2.18 (t,  $J = 16.0$  Hz, 2H), 1.80 (d,  $J = 20.0$  Hz, 1H), 1.76-1.63 (m, 2H), 1.48-1.32 (m, 1H), 1.31-1.18 (m, 2H), 0.98 (t,  $J = 8.0$  Hz, 3H), 0.93 (s, 3H), 0.88 (s, 3H), 0.74 (t,  $J = 8.0$  Hz, 3H);  $^{13}\text{C}$  NMR (100 MHz,  $\text{CDCl}_3$ )  $\delta$  194.1, 153.7, 140.0, 138.5, 138.1, 130.2, 127.6, 107.3, 88.3, 83.5, 80.6, 80.1, 57.0, 56.9, 56.8, 53.1, 50.1, 47.2, 41.8, 38.3, 32.8, 29.9, 26.0, 24.9, 22.8, 21.3, 21.1, 11.3, 11.2, one carbon missing in the aromatic region. IR (KBr)  $\nu$  3439, 3037, 2964, 2934, 2873, 1634, 1591, 1539, 1392, 749  $\text{cm}^{-1}$ . HRMS (ESI) calcd for  $\text{C}_{31}\text{H}_{40}\text{N}_5\text{O}_5$   $[\text{M}+\text{H}]^+$  562.3024, found 562.3028.

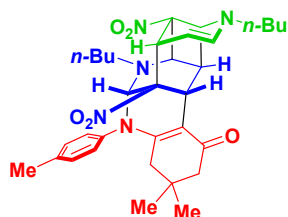

7,11-dibutyl-3,3-dimethyl-7b,13-dinitro-5-(*p*-tolyl)-3,4,5,6,7,7a,7b,8,11,11a,11b,12-dodecahydro-6,8,12-(epimethanetriyl)benzo[*d*]pyrido[3',2':3,4]cyclobuta[1,2-*g*][1,3]diazocin-1(2*H*)-one (**3za**)

Yellow solid obtained by column chromatography (petroleum ether/ethyl acetate = 5:1); 75.4 mg, 85% yield; dr > 20:1; reaction time = 5 min; mp 200.6-201.5 °C;  $^1\text{H}$  NMR (400 MHz,  $\text{CDCl}_3$ ),  $\delta$  7.17 (d,  $J = 8.0$  Hz, 2H), 6.92 (s, 2H), 6.27 (d,  $J = 4.0$  Hz, 1H), 5.02 (d,  $J = 4.0$  Hz, 1H), 4.00 (dd,  $J_1 = J_2 = 4.0$  Hz, 1H), 3.91 (t,  $J = 8.0$  Hz, 1H), 3.77-3.73 (m, 2H), 3.61 (d,  $J = 8.0$  Hz, 1H), 3.19-3.09 (m, 2H), 3.01-2.94 (m, 1H), 2.73 (t,  $J = 8.0$  Hz, 1H), 2.53-2.46 (m, 1H), 2.36 (s, 3H), 2.21-2.10 (m, 3H), 1.79 (d,  $J = 16.0$  Hz, 1H), 1.69-1.60 (m, 2H), 1.41-1.33 (m, 3H), 1.20-1.09 (m, 3H), 0.95 (t,  $J = 8.0$  Hz, 3H), 0.91 (s, 3H), 0.87 (s, 3H), 0.77 (t,  $J = 8.0$  Hz, 3H);  $^{13}\text{C}$  NMR (100 MHz,  $\text{CDCl}_3$ )  $\delta$  194.0, 153.5, 140.0, 138.4, 138.0, 130.2, 127.6, 107.2, 88.2, 83.5, 80.7, 80.1, 56.8, 54.9, 54.4, 52.9, 50.0, 46.9, 41.8, 38.3, 32.8, 31.3, 30.2, 29.9, 25.9, 24.8, 21.0, 19.9, 19.8, 13.7 (2C), one carbon missing in the aromatic region. IR (KBr)  $\nu$  3392, 2959, 2866, 1632, 1581, 1394, 733  $\text{cm}^{-1}$ . HRMS (ESI) calcd for  $\text{C}_{33}\text{H}_{44}\text{N}_5\text{O}_5$   $[\text{M}+\text{H}]^+$  590.3337, found 590.3336.

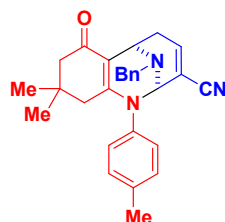

3-benzyl-9,9-dimethyl-7-oxo-1-(*p*-tolyl)-1,2,3,6,7,8,9,10-octahydro-2,6-methanobenzo[*d*][1,3]diazocine-5-carbonitrile (**3zb**)

White solid obtained by filtration of the precipitate; 31.6 mg, 50% yield; dr > 20:1; reaction time = 5 min; mp 180.4-182.1 °C; <sup>1</sup>H NMR (400 MHz, CDCl<sub>3</sub>) δ 7.28 (d, *J* = 8.0 Hz, 5H), 7.02 (d, *J* = 8.0 Hz, 2H), 6.89 (s, 3H), 4.91 (s, 1H), 4.14 (d, *J* = 20.0 Hz, 1H), 4.05 (s, 1H), 3.73 (d, *J* = 20.0 Hz, 1H), 2.45 (s, 3H), 2.30-2.12 (m, 3H), 1.88-1.68 (m, 3H), 0.96 (s, 3H), 0.90 (s, 3H); <sup>13</sup>C NMR (100 MHz, CDCl<sub>3</sub>) δ 192.8, 155.0, 144.7, 140.7, 137.9, 136.1, 130.5, 128.8, 128.0, 127.3, 121.3, 113.7, 84.1, 69.3, 58.3, 49.6, 41.2, 32.7, 29.2, 27.1, 25.9, 22.1, 21.1. IR (KBr) ν 3433, 2955, 2872, 1642, 1586, 1541, 1379, 1161, 743 cm<sup>-1</sup>. HRMS (ESI) calcd for C<sub>28</sub>H<sub>30</sub>N<sub>3</sub>O [M+H]<sup>+</sup> 424.2383, found 424.2380.

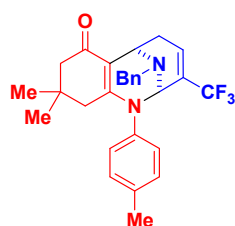

3-benzyl-9,9-dimethyl-1-(*p*-tolyl)-11-(trifluoromethyl)-2,3,6,8,9,10-hexahydro-2,6-methanobenzo[*d*][1,3]diazocin-7(*1H*)-one (**3zc**)

Yellow solid obtained by column chromatography (petroleum ether/ethyl acetate = 5:1); 28.9 mg, 41% yield; dr > 20:1; reaction time = 5 min; mp 186.4-187.8 °C; <sup>1</sup>H NMR (400 MHz, CDCl<sub>3</sub>) δ 7.39-7.32 (m, 4H), 7.29 (d, *J* = 8.0 Hz, 1H), 7.22 (br, 2H), 6.88 (br, 2H), 6.43-6.40 (m, 1H), 5.65 (dd, *J*<sub>1</sub> = *J*<sub>2</sub> = 4.0 Hz, 1H), 4.68 (s, 1H), 4.53 (d, *J* = 8.0 Hz, 1H), 3.81 (d, *J* = 16.0 Hz, 1H), 3.60 (d, *J* = 16.0 Hz, 1H), 2.91-2.84 (m, 1H), 2.37 (s, 3H), 2.24-2.20 (m, 3H), 1.88 (d, *J* = 16.0 Hz, 1H), 1.08 (s, 3H), 0.98 (s, 3H); <sup>13</sup>C NMR (100 MHz, CDCl<sub>3</sub>) δ 192.7, 154.9, 138.1 (d, *J* = 22.0 Hz, 1C), 136.8 (d, *J* = 14.0 Hz, 1C), 131.3, 130.3, 129.0, 128.4, 127.6, 127.3, 123.0, 114.1, 103.4, 73.6 (d, *J* = 3.0 Hz, 1C), 57.0, 49.0 (d, *J* = 131.0 Hz, 1C), 45.3, 45.0, 44.8, 41.0, 33.0, 28.6 (d, *J* = 173.0 Hz, 1C), 21.0. IR (KBr) ν 3439, 2958, 2929, 1616, 1559, 1508, 1391, 1272, 1119, 742 cm<sup>-1</sup>. HRMS (ESI) calcd for C<sub>28</sub>H<sub>30</sub>F<sub>3</sub>N<sub>2</sub>O [M+H]<sup>+</sup> 467.2305, found 467.2302.

### 3. Screening chiral bases for asymmetric synthesis of **3a**

Table S1 Screening chiral bases<sup>a</sup>

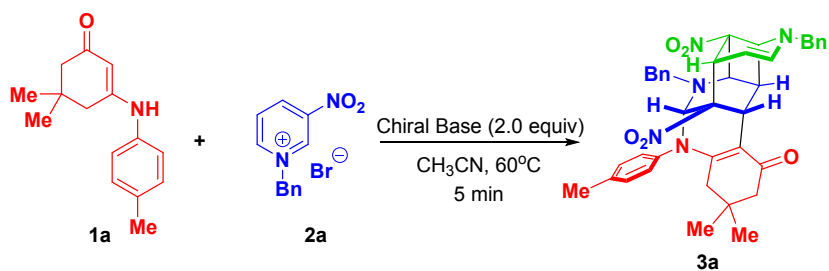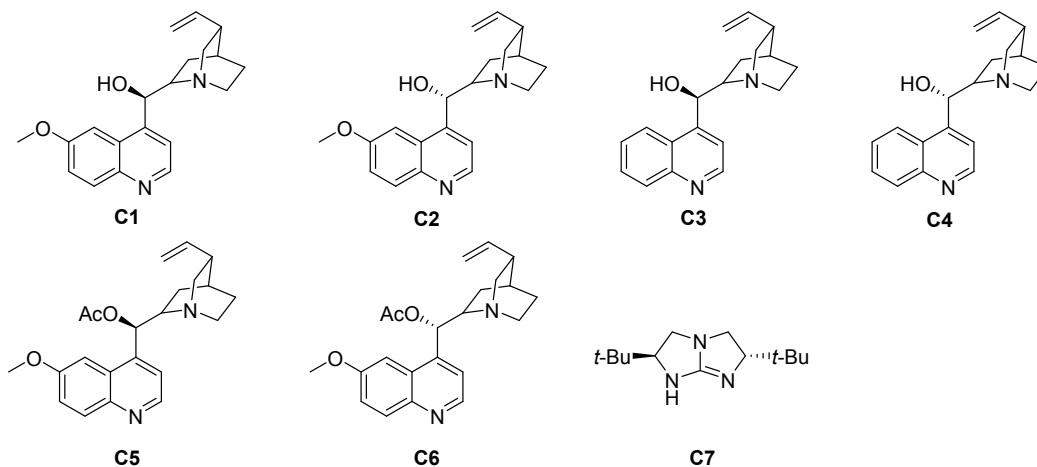

| entry | chiral bases | yield (%) <sup>b</sup> | ee (%) <sup>c</sup> |
|-------|--------------|------------------------|---------------------|
| 1     | C1           | 12                     | -6                  |
| 2     | C2           | 6                      | -5                  |
| 3     | C3           | trace                  | N.D.                |
| 4     | C4           | 9                      | -4                  |
| 5     | C5           | 17                     | -5                  |
| 6     | C6           | 18                     | -1                  |
| 7     | C7           | 55                     | 10                  |

<sup>a</sup> Unless otherwise noted, the reactions were conducted with 0.15 mmol **1a** with 2.2 equivalents of **2a** in the presence of 2.0 equivalents of base in 0.8 mL of CH<sub>3</sub>CN at 60 °C. <sup>b</sup> Isolated yields obtained by column chromatography. <sup>c</sup> The enantiomeric excess (ee) was determined by chiral HPLC.

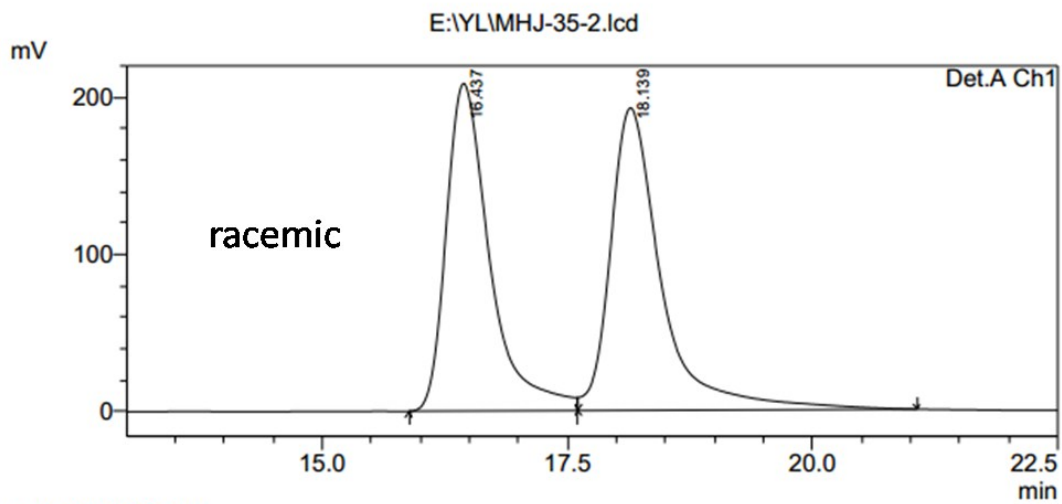

PeakTable

| Peak# | Ret. Time | Area     | Height | Area %  |
|-------|-----------|----------|--------|---------|
| 1     | 16.437    | 6466038  | 208988 | 48.095  |
| 2     | 18.139    | 6978225  | 192888 | 51.905  |
| Total |           | 13444263 |        | 100.000 |

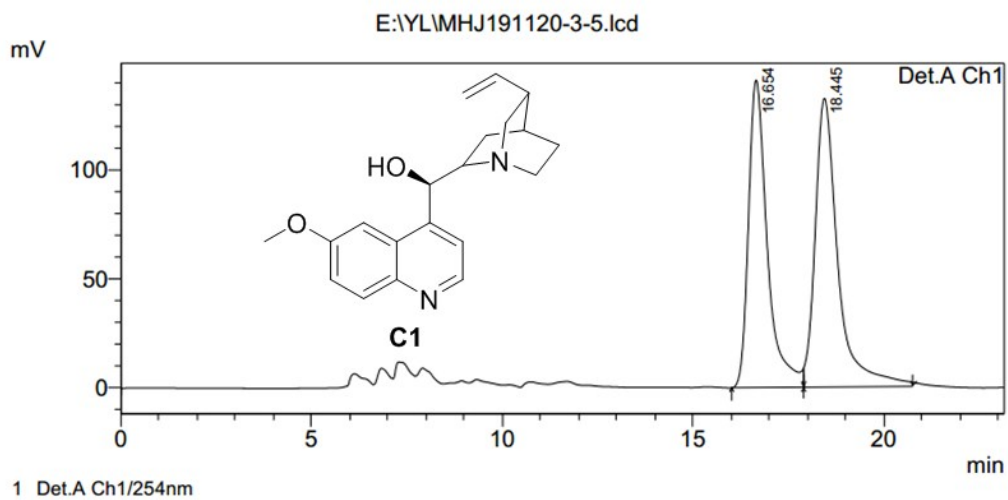

PeakTable

| Peak# | Ret. Time | Area     | Height | Area %  |
|-------|-----------|----------|--------|---------|
| 1     | 16.654    | 4835060  | 140908 | 46.844  |
| 2     | 18.445    | 5486588  | 132287 | 53.156  |
| Total |           | 10321648 |        | 100.000 |

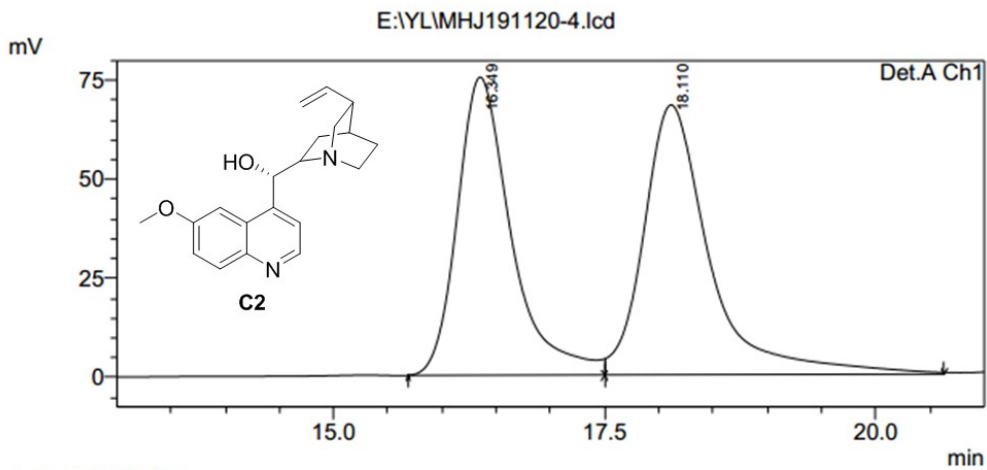

PeakTable

| Peak# | Ret. Time | Area    | Height | Area %  |
|-------|-----------|---------|--------|---------|
| 1     | 16.349    | 2602879 | 75237  | 47.399  |
| 2     | 18.110    | 2888502 | 68123  | 52.601  |
| Total |           | 5491382 |        | 100.000 |

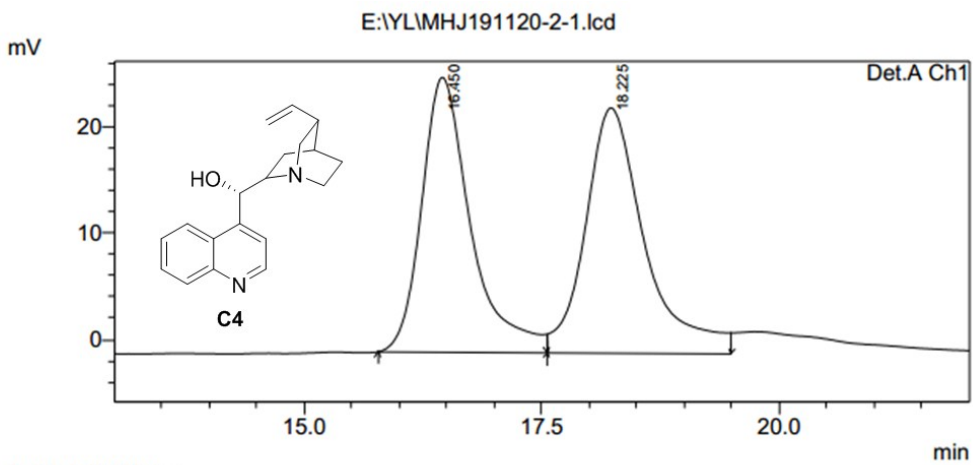

PeakTable

| Peak# | Ret. Time | Area    | Height | Area %  |
|-------|-----------|---------|--------|---------|
| 1     | 16.450    | 926463  | 25805  | 48.081  |
| 2     | 18.225    | 1000412 | 23033  | 51.919  |
| Total |           | 1926876 |        | 100.000 |

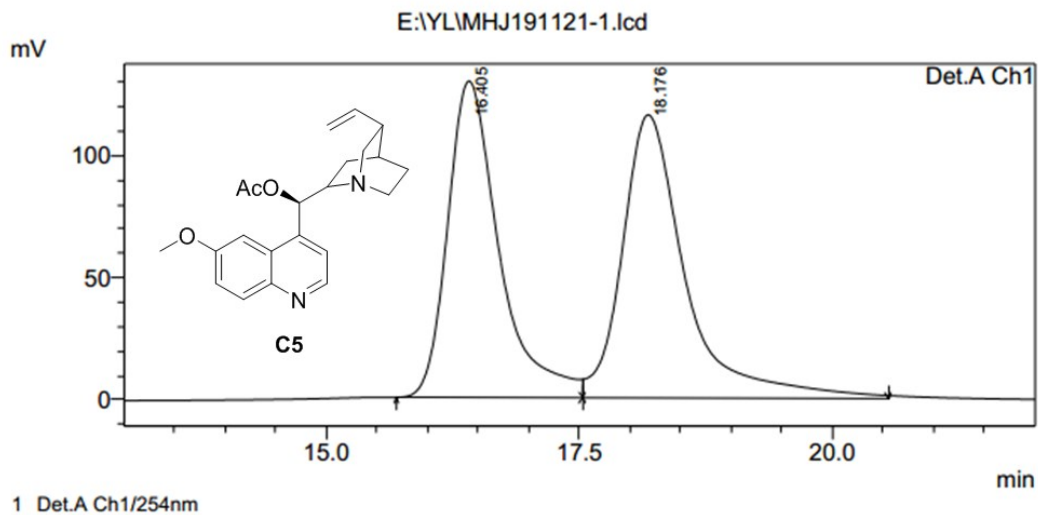

PeakTable

| Peak# | Ret. Time | Area    | Height | Area %  |
|-------|-----------|---------|--------|---------|
| 1     | 16.405    | 4576647 | 129686 | 47.647  |
| 2     | 18.176    | 5028612 | 116027 | 52.353  |
| Total |           | 9605259 |        | 100.000 |

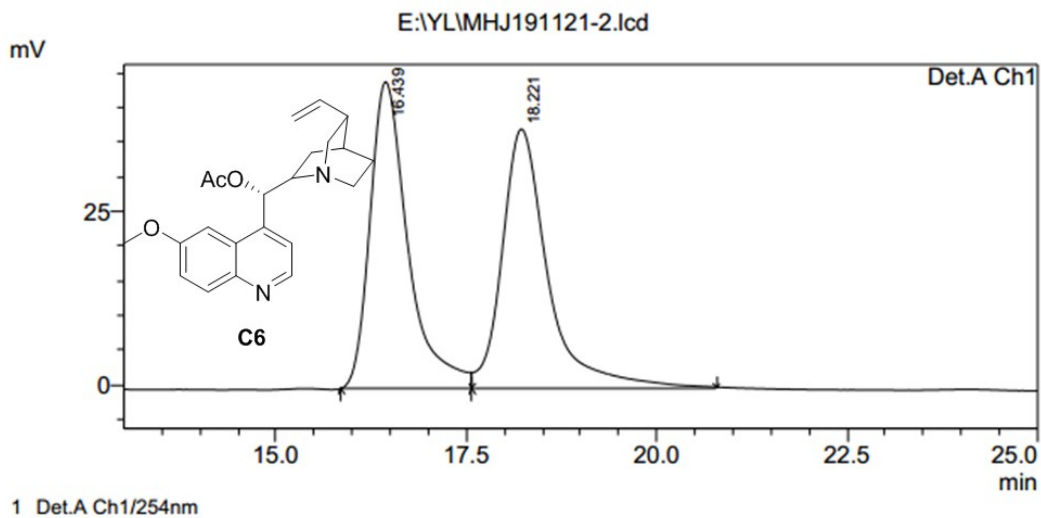

PeakTable

| Peak# | Ret. Time | Area    | Height | Area %  |
|-------|-----------|---------|--------|---------|
| 1     | 16.439    | 1535675 | 44301  | 49.395  |
| 2     | 18.221    | 1573281 | 37464  | 50.605  |
| Total |           | 3108956 |        | 100.000 |

#### 4. Experimental data for the formation of 5

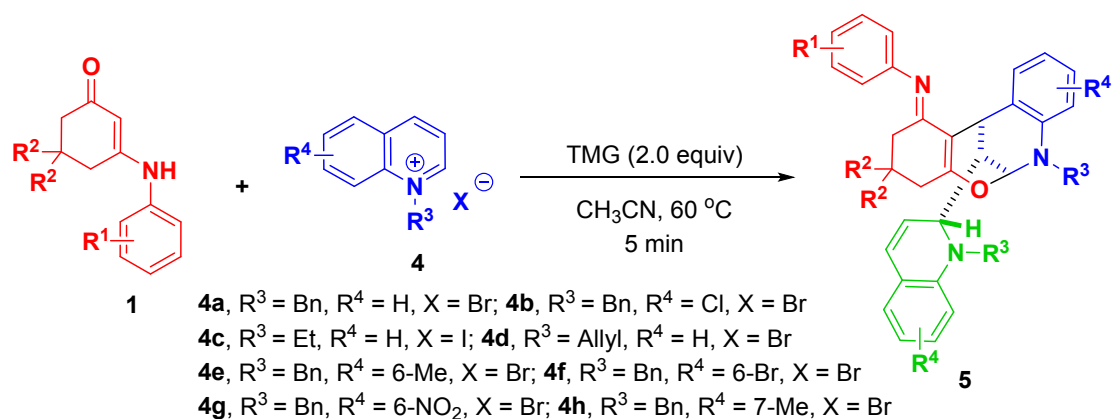

**General procedure:** To a 5.0 mL vial were successively added enaminones **1** (0.15 mmol), *N*-alkyl quinolinium salts **4** (0.33 mmol) and 0.8 mL of CH<sub>3</sub>CN. And then, TMG (34.6 mg, 0.30 mmol) was added by syringe. The resulting mixture was stirred at 60 °C for 5 min. Upon completion of the reaction (monitoring by TLC), the products **5** were precipitated from the reaction mixtures and only a filtration was needed to purify them. (Note: The products were sensitive to acidic conditions, which could not be purified by silica gel column chromatography. They were liable to lose one molecule of quinoline to afford mono-quinoline bridged cyclic compounds **6**.) For substrates **4k** and **4j**, only mono-quinoline bridged cyclic compounds **7** and **8** were generated, which were purified by column chromatography.

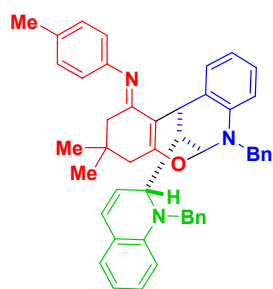

7-benzyl-13-(1-benzyl-1,2-dihydroquinolin-2-yl)-3,3-dimethyl-*N*-(*p*-tolyl)-2,3,4,6,7,12-hexahydro-1*H*-6,12-methanodibenzo[*d,g*][1,3]oxazocin-1-imine (**5a**)

White solid obtained by filtration of the precipitate; 97.7 mg, 98% yield; dr > 20:1; reaction time = 5 min; mp 189.5-190.4 °C; <sup>1</sup>H NMR (400 MHz, CDCl<sub>3</sub>), δ 7.66 (d, *J* = 8.0 Hz, 1H), 7.29-7.21 (m, 5H), 7.10 (d, *J* = 4.0 Hz, 5H), 7.03-6.96 (m, 3H), 6.92 (d, *J* = 8.0 Hz, 2H), 6.75 (t, *J* = 8.0 Hz, 1H), 6.67 (d, *J* = 8.0 Hz, 1H), 6.61 (t, *J* = 8.0 Hz, 4H), 6.43 (d, *J* = 8.0 Hz, 1H), 5.35 (s, 2H), 5.01 (d, *J* = 16.0 Hz, 1H), 4.78 (d, *J* = 16.0 Hz, 1H), 4.68 (d, *J* = 16.0 Hz, 1H), 4.50 (s, 1H), 4.21 (d, *J* = 16.0



Hz, 1H), 3.73 (t,  $J = 8.0$  Hz, 1H), 2.44 (d,  $J = 8.0$  Hz, 1H), 2.33 (s, 3H), 2.10-2.03 (m, 3H), 1.83 (d,  $J = 16.0$  Hz, 1H), 0.90 (s, 3H), 0.78 (s, 3H);  $^{13}\text{C}$  NMR (100 MHz,  $\text{CDCl}_3$ )  $\delta$  162.9, 158.0, 150.1, 142.9, 141.6, 138.8, 138.5, 131.3, 129.8, 129.4, 128.7, 128.2, 127.3, 127.1, 127.1, 126.8, 126.8, 126.6, 126.5, 125.3, 123.0, 121.2, 119.7, 118.3, 116.7, 114.5, 114.0, 110.7, 82.9, 56.6, 55.7, 53.2, 41.5, 41.0, 40.6, 31.2, 29.0, 28.9, 27.7, 20.8. IR (KBr)  $\nu$  3421, 3029, 2951, 1597, 1494, 1222, 747  $\text{cm}^{-1}$ . HRMS (ESI) calcd for  $\text{C}_{47}\text{H}_{46}\text{N}_3\text{O}$   $[\text{M}+\text{H}]^+$  668.3635, found 668.3617.

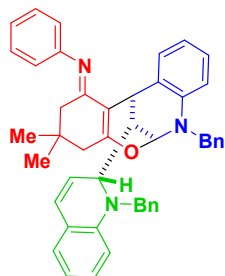

7-benzyl-13-(1-benzyl-1,2-dihydroquinolin-2-yl)-3,3-dimethyl-*N*-phenyl-2,3,4,6,7,12-hexahydro-1*H*-6,12-methanodibenzo[*d,g*][1,3]oxazocin-1-imine (**5b**)

White solid obtained by filtration of the precipitate; 81.9 mg, 84% yield; dr = 2.7:1; reaction time = 5 min; mp 185.6-186.6 °C;  $^1\text{H}$  NMR (400 MHz,  $\text{CDCl}_3$ )  $\delta$  7.67 (d,  $J = 8.0$  Hz, 1H), 7.35-6.91 (m, 15H), 6.78-6.54 (m, 7H), 6.44 (d,  $J = 12.0$  Hz, 1H), 5.78-5.35 (m, 2H), 5.01 (d,  $J = 16.0$  Hz, 1H), 4.80-4.43 (m, 3H), 4.21 (d,  $J = 16.0$  Hz, 1H), 3.74 (q,  $J = 8.0$  Hz, 1H), 2.45 (d,  $J = 12.0$  Hz, 1H), 2.03 (t,  $J = 12.0$  Hz, 3H), 1.81 (dd,  $J_1 = 8.0$  Hz,  $J_2 = 12.0$  Hz, 1H), 0.90 (s, 3H), 0.79 (s, 3H);  $^{13}\text{C}$  NMR (100 MHz,  $\text{CDCl}_3$ )  $\delta$  162.9, 158.3, 152.8, 142.9, 141.6, 138.7, 138.5, 129.8, 128.8, 128.6, 128.5, 128.3, 128.2, 127.3, 127.1, 127.1, 126.9, 126.7, 126.5, 125.2, 122.9, 122.1, 121.2, 119.8, 118.3, 116.7, 114.5, 113.9, 110.7, 82.9, 56.6, 55.6, 53.1, 41.5, 41.0, 40.6, 31.2, 28.9, 27.6. IR (KBr)  $\nu$  3434, 2953, 1594, 1492, 1381, 746  $\text{cm}^{-1}$ . HRMS (ESI) calcd for  $\text{C}_{46}\text{H}_{44}\text{N}_3\text{O}$   $[\text{M}+\text{H}]^+$  654.3479, found 654.3461.

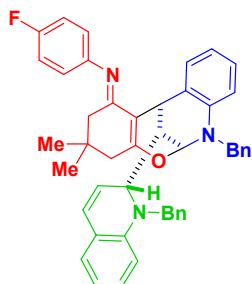

7-benzyl-13-(1-benzyl-1,2-dihydroquinolin-2-yl)-*N*-(4-fluorophenyl)-3,3-dimethyl-2,3,4,6,7,12-hexahydro-1*H*-6,12-methanodibenzo[*d,g*][1,3]oxazocin-1-imine (**5c**)

White solid obtained by filtration of the precipitate; 82.8 mg, 83% yield; dr > 20:1; reaction time = 5 min; mp 184.1-185.0 °C; <sup>1</sup>H NMR (400 MHz, CDCl<sub>3</sub>) δ 7.48 (d, *J* = 8.0 Hz, 1H), 7.21 (d, *J* = 4.0 Hz, 1H), 7.24-7.14 (m, 5H), 7.03-6.95 (m, 8H), 6.72-6.55 (m, 8H), 5.76 (t, *J* = 8.0 Hz, 1H), 5.44 (s, 1H), 4.80 (d, *J* = 16.0 Hz, 1H), 4.58 (t, *J* = 16.0 Hz, 2H), 4.38 (s, 1H), 4.03 (d, *J* = 16.0 Hz, 1H), 3.60 (t, *J* = 8.0 Hz, 1H), 2.37 (d, *J* = 8.0 Hz, 1H), 2.07-2.00 (m, 3H), 1.78 (d, *J* = 16.0 Hz, 1H), 0.89 (s, 3H), 0.81 (s, 3H); <sup>13</sup>C NMR (100 MHz, CDCl<sub>3</sub>) δ 160.4, 158.2, 148.5, 142.8, 141.1, 138.4, 138.3, 129.3, 128.5, 128.5, 128.4, 127.3, 127.2, 127.1, 126.9, 126.9, 126.8, 126.6, 124.5 (d, *J* = 73.0 Hz, 1C), 122.5, 121.0, 120.9, 117.9 (d, *J* = 33.0 Hz, 1C), 115.5, 115.4, 115.3, 114.0, 110.8, 85.2, 57.9, 56.8, 54.0, 41.5, 41.1, 40.0, 31.2, 29.2, 27.8, 27.4. IR (KBr) ν 3437, 3033, 2954, 1599, 1494, 1215, 750 cm<sup>-1</sup>. HRMS (ESI) calcd for C<sub>46</sub>H<sub>43</sub>FN<sub>3</sub>O [M+H]<sup>+</sup> 672.3385, found 672.3361.

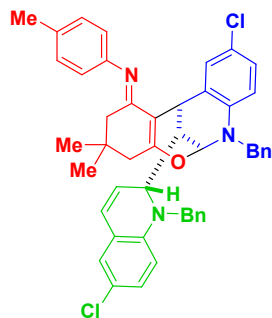

7-benzyl-13-(1-benzyl-6-chloro-1,2-dihydroquinolin-2-yl)-10-chloro-3,3-dimethyl-*N*-(*p*-tolyl)-2,3,4,6,7,12-hexahydro-1*H*-6,12-methanodibenzo[*d,g*][1,3]oxazocin-1-imine (**5d**)

White solid obtained by filtration of the precipitate; 114.2 mg, 99% yield; dr > 20:1; reaction time = 5 min; mp 194.8-196.0 °C; <sup>1</sup>H NMR (400 MHz, CDCl<sub>3</sub>) δ 7.67 (d, *J* = 4.0 Hz, 1H), 7.32-7.27 (m, 3H), 7.15 (t, *J* = 8.0 Hz, 7H), 6.99-6.93 (m, 5H), 6.61 (d, *J* = 8.0 Hz, 3H), 6.51 (d, *J* = 12.0 Hz, 1H), 6.40 (d, *J* = 12.0 Hz, 1H), 5.42 (t, *J* = 8.0 Hz, 1H), 5.31 (s, 1H), 4.94 (d, *J* = 16.0 Hz, 1H), 4.76 (d, *J* = 16.0 Hz, 1H), 4.64 (d, *J* = 16.0 Hz, 1H), 4.40 (s, 1H), 4.19 (d, *J* = 20.0 Hz, 1H), 3.69 (t, *J* = 8.0 Hz, 1H), 2.39 (t, *J* = 4.0 Hz, 1H), 2.35 (s, 3H), 2.13-2.03 (m, 3H), 1.85 (d, *J* = 16.0 Hz, 1H), 0.92 (s, 3H), 0.78 (s, 3H); <sup>13</sup>C NMR (100 MHz, CDCl<sub>3</sub>) δ 162.7, 158.2, 149.8, 141.4, 140.1, 138.0 (2C), 131.6, 129.5, 129.4, 128.8, 128.4 (2C), 127.3, 127.0, 126.8, 126.7, 126.6, 126.5, 126.4, 124.4, 123.0, 122.5, 121.9, 119.7, 115.9, 113.4, 111.9, 82.8, 56.5, 56.2, 53.4, 41.4, 40.9, 40.3, 31.2, 28.9, 28.6, 27.9, 20.8. IR (KBr) ν 3419, 2955, 1603, 1493, 1218, 878 cm<sup>-1</sup>. HRMS (ESI) calcd for C<sub>47</sub>H<sub>44</sub>Cl<sub>2</sub>N<sub>3</sub>O [M+H]<sup>+</sup> 736.2856, found 736.2847.

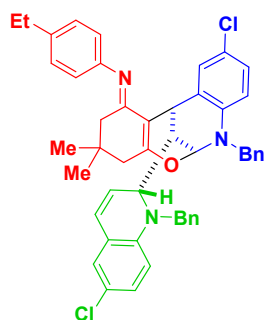

7-benzyl-13-(1-benzyl-6-chloro-1,2-dihydroquinolin-2-yl)-10-chloro-*N*-(4-ethylphenyl)-3,3-dimethyl-2,3,4,6,7,12-hexahydro-1*H*-6,12-methanodibenzo[*d,g*][1,3]oxazocin-1-imine (**5e**)

White solid obtained by filtration of the precipitate; 104.3 mg, 93% yield; dr > 20:1; reaction time = 5 min; mp 177.6-178.5 °C; <sup>1</sup>H NMR (400 MHz, CDCl<sub>3</sub>), δ 7.74 (d, *J* = 4.0 Hz, 1H), 7.31 (d, *J* = 8.0 Hz, 3H), 7.19 (d, *J* = 4.0 Hz, 7H), 7.00 (s, 5H), 6.66 (dd, *J*<sub>1</sub> = *J*<sub>2</sub> = 8.0 Hz, 3H), 6.55 (d, *J* = 8.0 Hz, 1H), 6.44 (d, *J* = 8.0 Hz, 1H), 5.47 (t, *J* = 8.0 Hz, 1H), 5.36 (s, 1H), 4.98 (d, *J* = 20.0 Hz, 1H), 4.80 (d, *J* = 20.0 Hz, 1H), 4.68 (d, *J* = 16.0 Hz, 1H), 4.45 (s, 1H), 4.24 (d, *J* = 16.0 Hz, 1H), 3.73 (t, *J* = 8.0 Hz, 1H), 2.70 (t, *J* = 8.0 Hz, 2H), 2.42 (d, *J* = 12.0 Hz, 1H), 2.11 (dd, *J*<sub>1</sub> = *J*<sub>2</sub> = 16.0 Hz, 3H), 1.90 (d, *J* = 16.0 Hz, 1H), 1.31 (t, *J* = 8.0 Hz, 3H), 0.97 (s, 3H), 0.82 (s, 3H); <sup>13</sup>C NMR (100 MHz, CDCl<sub>3</sub>) δ 162.7, 158.2, 150.0, 141.3, 140.1, 138.1, 138.0 (2C), 129.4, 128.8, 128.4 (2C), 128.3, 127.3, 127.0, 126.8, 126.7, 126.6, 126.4 (2C), 124.3, 123.0, 122.5, 121.9, 119.7, 115.9, 113.4, 111.9, 82.8, 56.5, 56.1, 53.4, 41.4, 40.9, 40.3, 31.2, 28.9, 28.6, 28.3, 27.9, 15.8. IR (KBr) ν 3442, 2958, 1603, 1492, 1220, 860 cm<sup>-1</sup>. HRMS (ESI) calcd for C<sub>48</sub>H<sub>46</sub>Cl<sub>2</sub>N<sub>3</sub>O [M+H]<sup>+</sup> 750.3012, found 750.3000.

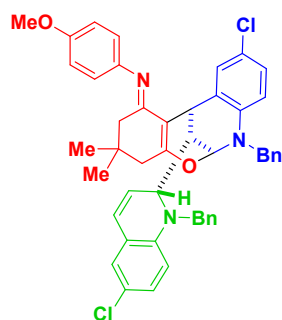

7-benzyl-13-(1-benzyl-6-chloro-1,2-dihydroquinolin-2-yl)-10-chloro-*N*-(4-methoxyphenyl)-3,3-dimethyl-2,3,4,6,7,12-hexahydro-1*H*-6,12-methanodibenzo[*d,g*][1,3]oxazocin-1-imine (**5f**)

White solid obtained by filtration of the precipitate; 96.8 mg, 86% yield; dr > 20:1; reaction time = 5 min; mp 163.4-164.4 °C; <sup>1</sup>H NMR (400 MHz, CDCl<sub>3</sub>), δ 7.73 (s, 1H), 7.33 (d, *J* = 8.0 Hz, 3H), 7.19 (d, *J* = 8.0 Hz, 5H), 7.02-6.93 (m, 7H), 6.70-6.64 (m, 3H), 6.54 (d, *J* = 8.0 Hz, 1H), 6.44 (d, *J*

= 8.0 Hz, 1H), 5.46 (t,  $J = 8.0$  Hz, 1H), 5.35 (s, 1H), 4.99 (d,  $J = 16.0$  Hz, 1H), 4.80 (d,  $J = 20.0$  Hz, 1H), 4.68 (d,  $J = 20.0$  Hz, 1H), 4.45 (s, 1H), 4.24 (d,  $J = 16.0$  Hz, 1H), 3.85 (s, 3H), 3.73 (t,  $J = 8.0$  Hz, 1H), 2.41 (d,  $J = 8.0$  Hz, 1H), 2.24-2.00 (m, 3H), 1.90 (d,  $J = 16.0$  Hz, 1H), 0.96 (s, 3H), 0.81 (s, 3H);  $^{13}\text{C}$  NMR (100 MHz,  $\text{CDCl}_3$ )  $\delta$  163.2, 158.2, 155.3, 145.7, 141.4, 140.1, 138.0, 137.9, 129.4, 128.8, 128.4 (2C), 127.3, 127.0, 126.8, 126.7, 126.6, 126.4 (2C), 124.3, 123.0, 122.5, 121.9, 120.8, 115.9, 114.3, 113.5, 111.9, 82.8, 56.4, 56.2, 55.5, 53.4, 41.4, 40.9, 40.3, 31.2, 28.9, 28.6, 28.0. IR (KBr)  $\nu$  3424, 2953, 1602, 1494, 1228, 879  $\text{cm}^{-1}$ . HRMS (ESI) calcd for  $\text{C}_{47}\text{H}_{44}\text{Cl}_2\text{N}_3\text{O}_2$   $[\text{M}+\text{H}]^+$  752.2805, found 752.2807.

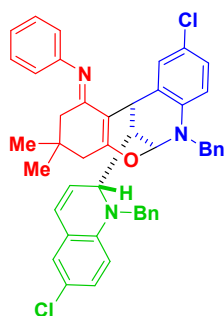

7-benzyl-13-(1-benzyl-6-chloro-1,2-dihydroquinolin-2-yl)-10-chloro-3,3-dimethyl-*N*-phenyl-2,3,4,6,7,12-hexahydro-1*H*-6,12-methanodibenzo[*d,g*][1,3]oxazocin-1-imine (**5g**)

White solid obtained by filtration of the precipitate; 77.0 mg, 71% yield; dr = 3.5:1; reaction time = 5 min; mp 169.9-170.7 °C;  $^1\text{H}$  NMR (400 MHz,  $\text{CDCl}_3$ ),  $\delta$  7.70 (s, 1H), 7.32-6.94 (m, 16H), 6.71 (d,  $J = 8.0$  Hz, 2H), 6.60 (d,  $J = 8.0$  Hz, 1H), 6.51 (d,  $J = 8.0$  Hz, 1H), 6.39 (d,  $J = 8.0$  Hz, 1H), 5.43 (d,  $J = 8.0$  Hz, 1H), 5.33 (s, 1H), 4.94 (d,  $J = 20.0$  Hz, 1H), 4.78-4.59 (m, 2H), 4.55-4.36 (m, 1H), 4.20 (d,  $J = 16.0$  Hz, 1H), 3.69 (t,  $J = 8.0$  Hz, 1H), 2.39 (d,  $J = 8.0$  Hz, 1H), 2.11-2.01 (m, 3H), 1.83 (d,  $J = 16.0$  Hz, 1H), 0.91 (s, 3H), 0.77 (s, 3H);  $^{13}\text{C}$  NMR (100 MHz,  $\text{CDCl}_3$ )  $\delta$  162.7, 158.5, 152.4, 141.3, 140.1, 137.9, 137.9, 129.2, 128.9, 128.7, 128.4, 128.3, 127.3, 127.1, 127.0, 126.8, 126.7, 126.6, 126.4, 124.3, 123.0, 122.4, 122.3, 121.8, 119.7, 115.9, 113.3, 111.9, 82.7, 56.4, 56.1, 53.3, 41.4, 40.9, 40.2, 31.1, 28.9, 28.6, 27.8. IR (KBr)  $\nu$  3426, 2955, 1596, 1489, 1377, 1220, 703  $\text{cm}^{-1}$ . HRMS (ESI) calcd for  $\text{C}_{46}\text{H}_{42}\text{Cl}_2\text{N}_3\text{O}$   $[\text{M}+\text{H}]^+$  722.2699, found 722.2705.

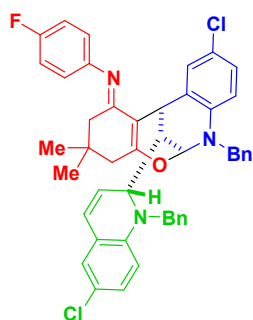

7-benzyl-13-(1-benzyl-6-chloro-1,2-dihydroquinolin-2-yl)-10-chloro-*N*-(4-fluorophenyl)-3,3-dimethyl-2,3,4,6,7,12-hexahydro-1*H*-6,12-methanodibenzo[*d,g*][1,3]oxazocin-1-imine (**5h**)

White solid obtained by filtration of the precipitate; 91.9 mg, 83% yield; dr = 5.0:1; reaction time = 5 min; mp 185.7-186.9 °C; <sup>1</sup>H NMR (400 MHz, CDCl<sub>3</sub>), δ 7.66 (s, 1H), 7.28-6.95 (m, 14H), 6.62 (d, *J* = 8.0 Hz, 3H), 6.51 (d, *J* = 8.0 Hz, 2H), 6.39 (d, *J* = 8.0 Hz, 1H), 5.42 (d, *J* = 8.0 Hz, 1H), 5.33 (s, 1H), 4.94 (d, *J* = 16.0 Hz, 1H), 4.78-4.48 (m, 2H), 4.39 (s, 1H), 4.20 (d, *J* = 16.0 Hz, 1H), 3.69 (t, *J* = 8.0 Hz, 1H), 2.38 (d, *J* = 8.0 Hz, 1H), 2.08-2.01 (m, 3H), 1.82 (d, *J* = 16.0 Hz, 1H), 0.91 (s, 3H), 0.78 (s, 3H); <sup>13</sup>C NMR (100 MHz, CDCl<sub>3</sub>) δ 163.7, 158.8, 148.4, 140.7 (d, *J* = 127.0 Hz, 1C), 137.9, 137.8, 129.2, 128.8, 128.6, 128.5, 128.4, 128.3, 127.3, 127.0, 126.9, 126.7, 126.6, 126.4, 124.3, 122.7 (d, *J* = 53.0 Hz, 1C), 121.9, 120.9, 120.8, 115.9, 115.6, 115.4, 113.3, 111.9, 82.8, 56.3, 56.2, 53.3, 41.4, 40.9, 40.2, 31.2, 28.9, 28.6, 27.9. IR (KBr) ν 3440, 2955, 1600, 1493, 1213, 725 cm<sup>-1</sup>. HRMS (ESI) calcd for C<sub>46</sub>H<sub>41</sub>Cl<sub>2</sub>FN<sub>3</sub>O [M+H]<sup>+</sup> 740.2605, found 740.2609.

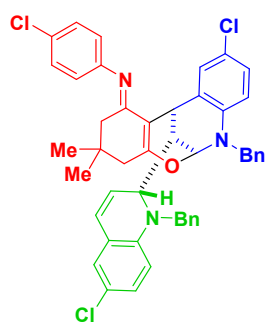

7-benzyl-13-(1-benzyl-6-chloro-1,2-dihydroquinolin-2-yl)-10-chloro-*N*-(4-chlorophenyl)-3,3-dimethyl-2,3,4,6,7,12-hexahydro-1*H*-6,12-methanodibenzo[*d,g*][1,3]oxazocin-1-imine (**5i**)

White solid obtained by filtration of the precipitate; 103.3 mg, 91% yield; dr > 20:1; reaction time = 5 min; mp 182.7-183.9 °C; <sup>1</sup>H NMR (400 MHz, CDCl<sub>3</sub>), δ 7.63 (d, *J* = 4.0 Hz, 1H), 7.31-7.28 (m, 5H), 7.16 (s, 5H), 7.01-6.95 (m, 5H), 6.64 (d, *J* = 8.0 Hz, 3H), 6.53 (d, *J* = 8.0 Hz, 1H), 6.41 (d, *J* = 8.0 Hz, 1H), 5.42 (t, *J* = 8.0 Hz, 1H), 5.33 (s, 1H), 4.95 (d, *J* = 16.0 Hz, 1H), 4.77 (d, *J* = 16.0 Hz, 1H), 4.65 (d, *J* = 16.0 Hz, 1H), 4.36 (s, 1H), 4.20 (d, *J* = 16.0 Hz, 1H), 3.69 (t, *J* = 8.0 Hz,

1H), 2.37 (d,  $J = 12.0$  Hz, 1H), 2.11-2.05 (m, 3H), 1.84 (d,  $J = 16.0$  Hz, 1H), 0.93 (s, 3H), 0.80 (s, 3H);  $^{13}\text{C}$  NMR (100 MHz,  $\text{CDCl}_3$ )  $\delta$  163.6, 159.1, 151.0, 141.4, 140.1, 137.9, 137.8, 129.2, 128.9, 128.8, 128.4 (2C), 127.5, 127.3, 127.0, 126.8, 126.7 (2C), 126.6, 126.4, 124.4, 123.0, 122.4, 122.0, 121.2, 116.0, 113.3, 112.0, 82.9, 56.3 (2C), 53.4, 41.4, 41.0, 40.2, 31.2, 28.9, 28.6, 27.9. IR (KBr)  $\nu$  3442, 1634, 1487, 725  $\text{cm}^{-1}$ . HRMS (ESI) calcd for  $\text{C}_{46}\text{H}_{41}\text{Cl}_3\text{N}_3\text{O}$   $[\text{M}+\text{H}]^+$  756.2310, found 756.2314.

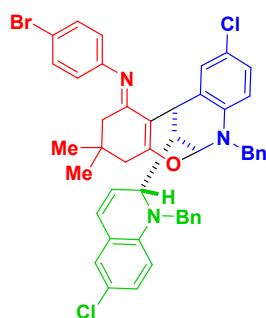

7-benzyl-13-(1-benzyl-6-chloro-1,2-dihydroquinolin-2-yl)-*N*-(4-bromophenyl)-10-chloro-3,3-dimethyl-2,3,4,6,7,12-hexahydro-1*H*-6,12-methanodibenzo[*d,g*][1,3]oxazocin-1-imine (**5j**)

White solid obtained by filtration of the precipitate; 90.7 mg, 76% yield; dr > 20:1; reaction time = 5 min; mp 192.5-193.8  $^{\circ}\text{C}$ ;  $^1\text{H}$  NMR (400 MHz,  $\text{CDCl}_3$ ),  $\delta$  7.61 (s, 1H), 7.42 (d,  $J = 8.0$  Hz, 2H), 7.28 (s, 4H), 7.15 (s, 5H), 6.96 (s, 5H), 6.64-6.50 (m, 5H), 6.40 (d,  $J = 8.0$  Hz, 1H), 5.41 (t,  $J = 8.0$  Hz, 1H), 5.32 (s, 1H), 4.93 (d,  $J = 16.0$  Hz, 1H), 4.75 (d,  $J = 16.0$  Hz, 1H), 4.64 (d,  $J = 16.0$  Hz, 1H), 4.35 (s, 1H), 4.19 (d,  $J = 16.0$  Hz, 1H), 3.67 (t,  $J = 8.0$  Hz, 1H), 2.36 (d,  $J = 8.0$  Hz, 1H), 2.05 (s, 2H), 1.82 (d,  $J = 16.0$  Hz, 1H), 0.92 (s, 3H), 0.78 (s, 3H);  $^{13}\text{C}$  NMR (100 MHz,  $\text{CDCl}_3$ )  $\delta$  163.5, 159.1, 151.4, 141.4, 140.1, 138.0, 137.9, 131.8, 129.2, 128.8, 128.6, 128.5, 128.4, 127.4, 127.0, 126.9, 126.7, 126.6, 126.4, 124.4, 123.0, 122.4, 122.0, 121.7, 116.0, 115.1, 113.3, 112.0, 82.9, 56.3, 53.4, 41.4, 41.1, 41.0, 40.2, 31.3, 28.9, 28.6, 27.9. IR (KBr)  $\nu$  3420, 2955, 1601, 1487, 1382, 1219, 725  $\text{cm}^{-1}$ . HRMS (ESI) calcd for  $\text{C}_{46}\text{H}_{41}\text{BrCl}_2\text{N}_3\text{O}$   $[\text{M}+\text{H}]^+$  800.1657, found 800.1659.

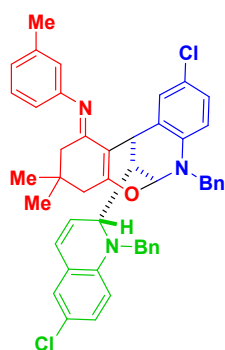

7-benzyl-13-(1-benzyl-6-chloro-1,2-dihydroquinolin-2-yl)-10-chloro-3,3-dimethyl-*N*-(*m*-tolyl)-2,3,4,6,7,12-hexahydro-1*H*-6,12-methanodibenzo[*d,g*][1,3]oxazocin-1-imine (**5k**)

White solid obtained by filtration of the precipitate; 105.8 mg, 96% yield; dr = 6.6:1; reaction time = 5 min; mp 194.9-196.3 °C; <sup>1</sup>H NMR (400 MHz, CDCl<sub>3</sub>) δ 7.70 (s, 1H), 7.29-6.84 (m, 15H), 6.61-6.49 (s, 4H), 6.39 (d, *J* = 12.0 Hz, 1H), 5.42 (t, *J* = 8.0 Hz, 1H), 5.32 (s, 1H), 4.94 (d, *J* = 16.0 Hz, 1H), 4.78-4.61 (m, 2H), 4.41 (s, 1H), 4.20 (d, *J* = 16.0 Hz, 1H), 3.69 (t, *J* = 8.0 Hz, 1H), 2.35 (t, *J* = 20.0 Hz, 4H), 2.06 (q, *J* = 20.0 Hz, 3H), 1.83 (d, *J* = 16.0 Hz, 1H), 0.92 (s, 3H), 0.77 (s, 3H); <sup>13</sup>C NMR (100 MHz, CDCl<sub>3</sub>) δ 162.5, 158.3, 152.4, 141.3, 140.1, 138.6, 137.9, 137.9, 129.3, 128.7, 128.5, 128.5, 128.4, 128.3, 127.3, 127.0, 126.8, 126.7, 126.6, 126.6, 126.4, 124.3, 123.1, 123.0, 122.5, 121.9, 120.4, 116.7, 115.9, 113.3, 111.9, 82.8, 56.4, 56.1, 53.4, 41.4, 40.9, 40.2, 31.2, 28.6, 27.8, 21.5. IR (KBr) ν 3439, 2953, 1596, 1490, 1376, 879 cm<sup>-1</sup>. HRMS (ESI) calcd for C<sub>47</sub>H<sub>44</sub>Cl<sub>2</sub>N<sub>3</sub>O [M+H]<sup>+</sup> 736.2856, found 736.2861.

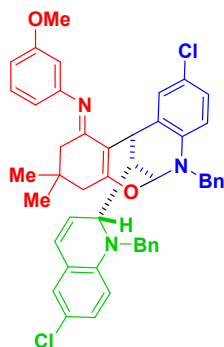

7-benzyl-13-(1-benzyl-6-chloro-1,2-dihydroquinolin-2-yl)-10-chloro-*N*-(3-methoxyphenyl)-3,3-dimethyl-2,3,4,6,7,12-hexahydro-1*H*-6,12-methanodibenzo[*d,g*][1,3]oxazocin-1-imine (**5l**)

White solid obtained by filtration of the precipitate; 86.4 mg, 77% yield; dr > 20:1; reaction time = 5 min; mp 189.2-190.7 °C; <sup>1</sup>H NMR (400 MHz, CDCl<sub>3</sub>) δ 7.70 (s, 1H), 7.28-7.14 (m, 9H), 6.94 (d, *J* = 4.0 Hz, 5H), 6.61 (d, *J* = 8.0 Hz, 2H), 6.51 (d, *J* = 8.0 Hz, 1H), 6.39 (d, *J* = 8.0 Hz, 1H), 6.30 (d, *J* = 8.0 Hz, 2H), 5.41 (d, *J* = 8.0 Hz, 1H), 5.32 (s, 1H), 4.95 (d, *J* = 16.0 Hz, 1H), 4.78-4.59 (m, 2H), 4.39 (s, 1H), 4.20 (d, *J* = 16.0 Hz, 1H), 3.80 (s, 3H), 3.69 (d, *J* = 8.0 Hz, 1H), 2.38 (d, *J* = 12.0 Hz, 1H), 2.10 (t, *J* = 16.0 Hz, 3H), 1.84 (d, *J* = 16.0 Hz, 1H), 0.93 (s, 3H), 0.78 (s, 3H); <sup>13</sup>C NMR (100 MHz, CDCl<sub>3</sub>) δ 162.7, 160.3, 158.6, 153.8, 141.3, 140.1, 138.0, 137.9, 129.7, 129.3, 128.8, 128.4, 128.3, 127.3, 127.3, 127.0, 126.8, 126.7, 126.7, 126.6, 126.4, 124.3, 123.0, 122.4, 121.9, 115.9, 113.3, 112.0, 111.9, 108.3, 105.0, 82.8, 56.4, 56.2, 55.2, 53.4, 41.4, 40.9, 40.2, 31.2, 28.7, 27.8. IR (KBr) ν 3433, 2953, 1593, 1488, 1149, 876 cm<sup>-1</sup>. HRMS (ESI) calcd for

C<sub>47</sub>H<sub>44</sub>Cl<sub>2</sub>N<sub>3</sub>O<sub>2</sub> [M+H]<sup>+</sup> 752.2805, found 752.2805.

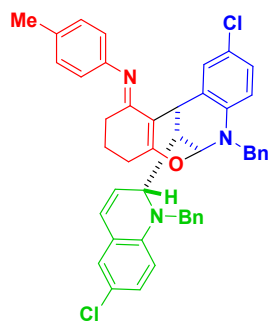

7-benzyl-13-(1-benzyl-6-chloro-1,2-dihydroquinolin-2-yl)-10-chloro-*N*-(*p*-tolyl)-2,3,4,6,7,12-hexahydro-1*H*-6,12-methanodibenzo[*d,g*][1,3]oxazocin-1-imine (**5m**)

White solid obtained by filtration of the precipitate; 91.1 mg, 86% yield; dr > 20:1; reaction time = 5 min; mp 159.7-160.8 °C; <sup>1</sup>H NMR (400 MHz, CDCl<sub>3</sub>), δ 7.72 (s, 1H), 7.28-7.14 (m, 10H), 6.95 (s, 5H), 6.64 (d, *J* = 8.0 Hz, 3H), 6.53 (d, *J* = 8.0 Hz, 1H), 6.40 (d, *J* = 8.0 Hz, 1H), 5.42 (t, *J* = 8.0 Hz, 1H), 5.30 (s, 1H), 4.95 (d, *J* = 24.0 Hz, 1H), 4.79-4.62 (m, 2H), 4.43 (s, 1H), 4.20 (d, *J* = 20.0 Hz, 1H), 3.66 (t, *J* = 8.0 Hz, 1H), 2.33 (s, 5H), 2.18 (s, 2H), 1.96 (s, 3H); <sup>13</sup>C NMR (100 MHz, CDCl<sub>3</sub>) δ 163.3, 159.9, 149.7, 141.3, 140.2, 137.9, 131.6, 129.5, 129.4, 128.8, 128.4, 128.3, 127.3, 127.0, 126.8, 126.7, 126.6, 126.4, 126.3, 124.4, 123.0, 122.7, 121.9, 119.8, 115.9, 114.5, 111.8, two carbons missing in the aromatic region, 82.5, 56.2, 56.1, 53.2, 40.1, 28.8, 27.5, 27.3, 20.8, 20.8. IR (KBr) ν 3432, 2947, 1601, 1493, 1383, 803 cm<sup>-1</sup>. HRMS (ESI) calcd for C<sub>45</sub>H<sub>40</sub>Cl<sub>2</sub>N<sub>3</sub>O [M+H]<sup>+</sup> 708.2543, found 708.2533.

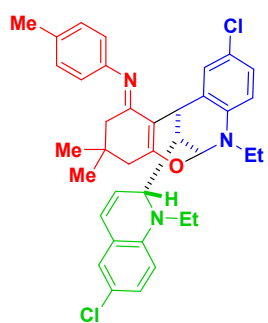

10-chloro-13-(6-chloro-1-ethyl-1,2-dihydroquinolin-2-yl)-7-ethyl-3,3-dimethyl-*N*-(*p*-tolyl)-2,3,4,6,7,12-hexahydro-1*H*-6,12-methanodibenzo[*d,g*][1,3]oxazocin-1-imine (**5n**)

White solid obtained by filtration of the precipitate; 67.2 mg, 73% yield; dr > 20:1; reaction time = 5 min; mp 185.4-186.0 °C; <sup>1</sup>H NMR (400 MHz, CDCl<sub>3</sub>), δ 7.52 (s, 1H), 7.06 (d, *J* = 8.0 Hz, 4H), 6.79-6.50 (m, 5H), 6.19 (d, *J* = 4.0 Hz, 1H), 5.47 (s, 1H), 4.61 (s, 1H), 4.02 (s, 1H), 3.77 (d, *J* = 8.0 Hz, 1H), 3.52-3.46 (m, 3H), 2.94 (s, 1H), 2.30 (s, 3H), 2.06-1.95 (m, 4H), 1.74 (d, *J* = 16.0 Hz,



1H), 1.24 (d,  $J = 24.0$  Hz, 6H), 0.87 (s, 3H), 0.74 (s, 3H);  $^{13}\text{C}$  NMR (100 MHz,  $\text{CDCl}_3$ )  $\delta$  162.5, 158.2, 149.9, 139.7, 138.8, 132.5, 131.2, 129.7, 129.3, 129.2, 127.1, 126.6, 126.2, 125.1, 123.8, 122.0, 119.7, 113.5, 112.3, 110.4, 97.4, 84.3, 44.4, 44.3, 41.7, 40.8, 40.5, 35.8, 31.1, 29.0, 27.2, 20.8, 13.3, 12.7. IR (KBr)  $\nu$  3437, 2961, 1604, 1492, 1380, 1219, 806  $\text{cm}^{-1}$ . HRMS (ESI) calcd for  $\text{C}_{37}\text{H}_{40}\text{Cl}_2\text{N}_3\text{O}$   $[\text{M}+\text{H}]^+$  612.2543, found 612.2529.

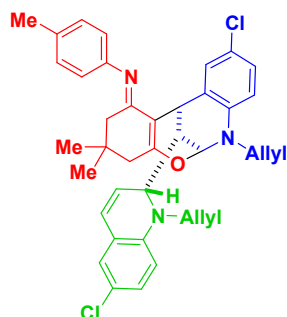

7-allyl-13-(1-allyl-6-chloro-1,2-dihydroquinolin-2-yl)-10-chloro-3,3-dimethyl-*N*-(*p*-tolyl)-2,3,4,6,7,12-hexahydro-1*H*-6,12-methanodibenzo[*d,g*][1,3]oxazocin-1-imine (**5o**)

White solid obtained by filtration of the precipitate; 65.2 mg, 68% yield; dr = 16:1; reaction time = 5 min; mp 170.9-172.3  $^{\circ}\text{C}$ ;  $^1\text{H}$  NMR (400 MHz,  $\text{CDCl}_3$ ),  $\delta$  7.58 (s, 1H), 7.12-7.08 (m, 4H), 6.84 (d,  $J = 4.0$  Hz, 1H), 6.69 (d,  $J = 8.0$  Hz, 1H), 6.58 (dd,  $J_1 = 12.0$  Hz,  $J_2 = 8.0$  Hz, 3H), 6.25 (d,  $J = 8.0$  Hz, 1H), 5.98-5.84 (m, 2H), 5.52 (s, 1H), 5.31-5.13 (m, 4H), 4.71 (t,  $J = 8.0$  Hz, 1H), 4.29 (dd,  $J_1 = 4.0$  Hz,  $J_2 = 8.0$  Hz, 1H), 4.12 (d,  $J = 8.0$  Hz, 4H), 3.05 (dd,  $J_1 = 8.0$  Hz,  $J_2 = 4.0$  Hz, 1H), 2.35 (s, 3H), 2.13-1.99 (m, 4H), 1.78 (d,  $J = 16.0$  Hz, 1H), 0.93 (s, 3H), 0.81 (s, 3H);  $^{13}\text{C}$  NMR (100 MHz,  $\text{CDCl}_3$ )  $\delta$  162.4, 158.0, 149.8, 140.2, 139.1, 133.8, 133.0, 132.7, 131.2, 129.5, 129.2, 126.8, 126.6, 126.2, 125.5, 123.6, 122.5, 119.7, 117.2, 116.6, 113.5, 113.0, 111.2, 97.6, 83.8, 52.2, 52.1, 41.6, 40.7, 40.6, 35.7, 31.1, 29.2, 28.9, 27.1, 20.7. IR (KBr)  $\nu$  3420, 2955, 1608, 1491, 1376, 1218, 929, 805  $\text{cm}^{-1}$ . HRMS (ESI) calcd for  $\text{C}_{39}\text{H}_{40}\text{Cl}_2\text{N}_3\text{O}$   $[\text{M}+\text{H}]^+$  636.2543, found 636.2518.

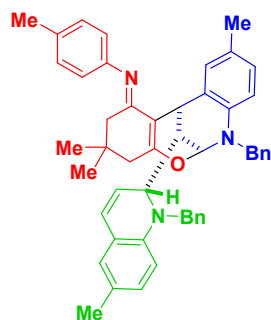

7-benzyl-13-(1-benzyl-6-methyl-1,2-dihydroquinolin-2-yl)-3,3,10-trimethyl-*N*-(*p*-tolyl)-2,3,4,6,7,12-hexahydro-1*H*-6,12-methanodibenzo[*d,g*][1,3]oxazocin-1-imine (**5p**)

White solid obtained by filtration of the precipitate; 63.7 mg, 61% yield; dr > 20:1; reaction time = 5 min; mp 180.6-181.7 °C; <sup>1</sup>H NMR (400 MHz, CDCl<sub>3</sub>), δ 7.48 (s, 1H), 7.34-7.20 (m, 5H), 7.12 (d, *J* = 4.0 Hz, 5H), 6.94 (d, *J* = 8.0 Hz, 2H), 6.84 (d, *J* = 8.0 Hz, 1H), 6.80 (s, 2H), 6.58 (d, *J* = 8.0 Hz, 3H), 6.49 (d, *J* = 8.0 Hz, 1H), 6.41 (d, *J* = 8.0 Hz, 1H), 5.40 (t, *J* = 8.0 Hz, 1H), 5.34 (s, 1H), 4.98 (d, *J* = 16.0 Hz, 1H), 4.77 (d, *J* = 16.0 Hz, 1H), 4.64 (d, *J* = 16.0 Hz, 1H), 4.45 (s, 1H), 4.21 (d, *J* = 16.0 Hz, 1H), 3.72 (t, *J* = 8.0 Hz, 1H), 2.43 (d, *J* = 12.0 Hz, 1H), 2.35 (s, 3H), 2.25 (s, 3H), 2.20 (s, 3H), 2.10-2.01 (m, 3H), 1.82 (d, *J* = 16.0 Hz, 1H), 0.91 (s, 3H), 0.79 (s, 3H); <sup>13</sup>C NMR (100 MHz, CDCl<sub>3</sub>) δ 163.0, 158.1, 150.3, 140.7, 139.3, 139.1, 138.8, 131.3, 130.5, 129.4, 129.3, 128.6, 128.2, 127.7, 127.2 (2C), 127.0 (2C), 126.8, 126.6, 125.7, 125.4, 123.0, 121.6, 119.6, 114.5, 114.0, 110.6, 83.3, 56.8, 55.8, 53.3, 41.6, 41.0, 40.5, 31.2, 29.1, 28.9, 27.7, 20.8, 20.5, 20.3. IR (KBr) ν 3434, 2954, 1603, 1500, 1380, 1220, 804 cm<sup>-1</sup>. HRMS (ESI) calcd for C<sub>49</sub>H<sub>50</sub>N<sub>3</sub>O [M+H]<sup>+</sup> 696.3948, found 696.3925.

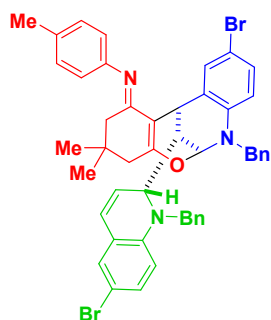

7-benzyl-13-(1-benzyl-6-bromo-1,2-dihydroquinolin-2-yl)-10-bromo-3,3-dimethyl-*N*-(*p*-tolyl)-2,3,4,6,7,12-hexahydro-1*H*-6,12-methanodibenzo[*d,g*][1,3]oxazocin-1-imine (**5q**)

White solid obtained by filtration of the precipitate; 100.7 mg, 81% yield; dr > 20:1; reaction time = 5 min; mp 191.7-192.7 °C; <sup>1</sup>H NMR (400 MHz, CDCl<sub>3</sub>), δ 7.83 (s, 1H), 7.28-7.07 (m, 13H), 6.95 (d, *J* = 8.0 Hz, 2H), 6.61 (d, *J* = 12.0 Hz, 2H), 6.57 (d, *J* = 12.0 Hz, 1H), 6.47 (d, *J* = 12.0 Hz, 1H), 6.39 (d, *J* = 12.0 Hz, 1H), 5.40 (t, *J* = 8.0 Hz, 1H), 5.30 (s, 1H), 4.95 (d, *J* = 20.0 Hz, 1H), 4.78-4.60 (m, 2H), 4.39 (s, 1H), 4.20 (d, *J* = 20.0 Hz, 1H), 3.68 (t, *J* = 12.0 Hz, 1H), 2.39 (s, 1H), 2.35 (s, 3H), 2.09 (t, *J* = 20.0 Hz, 3H), 1.84 (d, *J* = 20.0 Hz, 1H), 0.93 (s, 3H), 0.78 (s, 3H); <sup>13</sup>C NMR (100 MHz, CDCl<sub>3</sub>) δ 162.6, 158.2, 149.7, 141.7, 140.5, 137.8, 137.8, 132.1, 131.5, 131.2, 129.5, 129.5, 128.7, 128.5, 128.3, 127.3, 127.1, 127.0, 126.8, 126.4, 126.3, 124.8, 122.4, 119.6, 116.3, 113.3, 112.3, 110.2, 109.0, 82.6, 56.3, 56.0, 53.3, 41.3, 40.7, 40.2, 31.1, 28.7, 27.8, 20.8. IR (KBr) ν 3426, 2954, 1601, 1490, 1221, 800 cm<sup>-1</sup>. HRMS (ESI) calcd for C<sub>47</sub>H<sub>44</sub>Br<sub>2</sub>N<sub>3</sub>O [M+H]<sup>+</sup>

824.1846, found 824.1824.

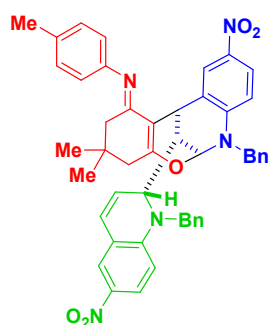

7-benzyl-13-(1-benzyl-6-nitro-1,2-dihydroquinolin-2-yl)-3,3-dimethyl-10-nitro-*N*-(*p*-tolyl)-  
2,3,4,6,7,12-hexahydro-1*H*-6,12-methanodibenzo[*d,g*][1,3]oxazocin-1-imine (**5r**)

White solid obtained by filtration of the precipitate; 87.0 mg, 77% yield; dr > 20:1; reaction time = 5 min; mp 203.1-204.0 °C; <sup>1</sup>H NMR (400 MHz, CDCl<sub>3</sub>), δ 8.68 (s, 1H), 7.95 (d, *J* = 8.0 Hz, 1H), 7.89 (s, 2H), 7.33 (s, 3H), 7.16 (s, 7H), 6.91 (s, 2H), 6.70 (d, *J* = 8.0 Hz, 1H), 6.64 (d, *J* = 8.0 Hz, 3H), 6.54 (d, *J* = 8.0 Hz, 1H), 5.39 (t, *J* = 8.0 Hz, 2H), 5.09 (d, *J* = 16.0 Hz, 1H), 4.84 (s, 2H), 4.55 (s, 1H), 4.30 (d, *J* = 16.0 Hz, 1H), 3.77 (t, *J* = 12.0 Hz, 1H), 2.45 (d, *J* = 8.0 Hz, 1H), 2.33 (s, 3H), 2.21-2.02 (m, 3H), 1.87 (d, *J* = 16.0 Hz, 1H), 0.94 (s, 3H), 0.76 (s, 3H); <sup>13</sup>C NMR (100 MHz, CDCl<sub>3</sub>) δ 162.2, 157.8, 149.0, 147.9, 147.0, 139.2, 138.2, 136.4, 136.1, 132.0, 129.5, 129.4, 129.0, 128.7, 127.9, 127.6, 126.8, 126.5, 125.3, 125.2, 124.7, 123.9, 123.4, 122.2, 121.7, 119.8, 113.4, 112.9, 110.2, 81.7, 57.1, 56.1, 53.6, 41.1, 40.8, 40.6, 31.2, 29.0, 27.9, 20.8. IR (KBr) ν 3430, 2954, 1601, 1501, 1322, 1099, 738 cm<sup>-1</sup>. HRMS (ESI) calcd for C<sub>47</sub>H<sub>44</sub>N<sub>5</sub>O<sub>5</sub> [M+H]<sup>+</sup> 758.3337, found 758.3315.

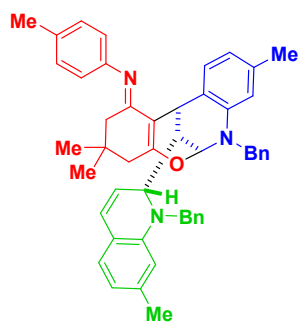

7-benzyl-13-(1-benzyl-7-methyl-1,2-dihydroquinolin-2-yl)-3,3,9-trimethyl-*N*-(*p*-tolyl)-  
2,3,4,6,7,12-hexahydro-1*H*-6,12-methanodibenzo[*d,g*][1,3]oxazocin-1-imine (**5s**)

White solid obtained by filtration of the precipitate; 96.8 mg, 93% yield; dr > 20:1; reaction time = 5 min; mp 179.2-180.5 °C; <sup>1</sup>H NMR (400 MHz, CDCl<sub>3</sub>), δ 7.53 (d, *J* = 4.0 Hz, 1H), 7.10 (s, 9H), 6.89 (d, *J* = 24.0 Hz, 3H), 6.59-6.38 (m, 8H), 5.29 (d, *J* = 16.0 Hz, 2H), 5.00 (d, *J* = 16.0 Hz, 1H),

4.71 (q,  $J = 16.0$  Hz, 2H), 4.46 (s, 1H), 4.20 (d,  $J = 16.0$  Hz, 1H), 3.69 (s, 1H), 2.40-2.01 (m, 13H), 1.83 (d,  $J = 16.0$  Hz, 1H), 0.91 (s, 3H), 0.78 (s, 3H);  $^{13}\text{C}$  NMR (100 MHz,  $\text{CDCl}_3$ )  $\delta$  163.1, 157.9, 150.2, 143.0, 141.6, 139.0, 138.7, 138.5, 136.4, 131.3, 129.6, 129.4, 128.6, 128.1, 127.1, 127.0, 126.9, 126.8, 126.6, 126.5, 122.6, 120.4, 120.1, 119.7, 119.1, 117.6, 115.0, 114.1, 111.3, 82.8, 56.5, 55.5, 52.9, 41.5, 41.0, 40.7, 31.2, 29.1, 28.5, 27.7, 21.9, 20.8. IR (KBr)  $\nu$  3417, 2655, 1607, 1500, 1220, 708  $\text{cm}^{-1}$ . HRMS (ESI) calcd for  $\text{C}_{49}\text{H}_{50}\text{N}_3\text{O}$   $[\text{M}+\text{H}]^+$  696.3948, found 696.3932.

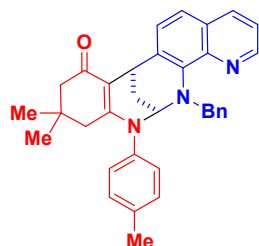

7-benzyl-11,11-dimethyl-9-(*p*-tolyl)-8,9,10,11,12,14-hexahydro-8,14-methanobenzo[7,8][1,3]diazocino[5,4-*h*]quinolin-13(7*H*)-one (**7**)

White solid obtained by column chromatography (petroleum ether/ethyl acetate = 4:1); 64.8 mg, 87% yield; dr > 20:1; reaction time = 5 min; mp 217.2-218.4 °C;  $^1\text{H}$  NMR (400 MHz,  $\text{CDCl}_3$ ),  $\delta$  8.90 (dd,  $J_1 = J_2 = 4.0$  Hz, 1H), 8.16 (dd,  $J_1 = J_2 = 4.0$  Hz, 1H), 7.70 (d,  $J = 8.0$  Hz, 1H), 7.41-7.36 (m, 2H), 7.20 (d,  $J = 8.0$  Hz, 2H), 7.11 (t,  $J = 8.0$  Hz, 1H), 7.00 (t,  $J = 8.0$  Hz, 4H), 6.67 (d,  $J = 12.0$  Hz, 2H), 5.17 (d,  $J = 12.0$  Hz, 1H), 4.92 (s, 1H), 4.74 (s, 1H), 4.05 (d,  $J = 12.0$  Hz, 1H), 2.39 (s, 3H), 2.32-2.19 (m, 3H), 1.93-1.79 (m, 3H), 0.89 (s, 3H), 0.69 (s, 3H);  $^{13}\text{C}$  NMR (100 MHz,  $\text{CDCl}_3$ )  $\delta$  191.1, 161.1, 146.9, 141.1, 138.8, 138.2, 138.1, 137.8, 137.7, 132.4, 129.9, 129.8, 128.9, 128.6, 128.3, 127.7, 126.6, 121.4, 120.1, 111.4, 72.0, 57.4, 47.7, 41.2, 32.6, 28.3, 27.4, 21.7, 21.0. IR (KBr)  $\nu$  3435, 2953, 1556, 1453, 1192, 1140, 797  $\text{cm}^{-1}$ . HRMS (ESI) calcd for  $\text{C}_{34}\text{H}_{34}\text{N}_3\text{O}$   $[\text{M}+\text{H}]^+$  500.2696, found 500.2686.

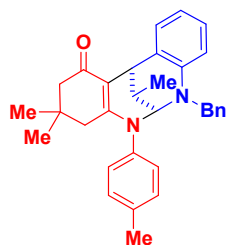

7-benzyl-3,3,13-trimethyl-5-(*p*-tolyl)-3,4,5,6,7,12-hexahydro-6,12-methanodibenzo[*d,g*][1,3]diazocin-1(2*H*)-one (**8**)

Yellow solid obtained by column chromatography (petroleum ether/ethyl acetate = 4:1); 38.0 mg, 51% yield; dr > 20:1; reaction time = 5 min; mp 147.8-148.9 °C;  $^1\text{H}$  NMR (400 MHz,  $\text{CDCl}_3$ ),  $\delta$

7.48 (d,  $J = 8.0$  Hz, 1H), 7.28-7.20 (m, 5H), 6.99 (d,  $J = 8.0$  Hz, 5H), 6.72 (t,  $J = 8.0$  Hz, 1H), 6.56 (d,  $J = 12.0$  Hz, 1H), 4.93 (s, 1H), 4.48 (d,  $J = 24.0$  Hz, 1H), 4.24 (s, 1H), 3.96 (d,  $J = 20.0$  Hz, 1H), 2.50-2.34 (m, 5H), 2.26 (d,  $J = 8.0$  Hz, 1H), 2.15 (d,  $J = 20.0$  Hz, 1H), 1.85 (d,  $J = 20.0$  Hz, 1H), 1.06 (d,  $J = 8.0$  Hz, 3H), 0.94 (s, 3H), 0.89 (s, 3H);  $^{13}\text{C}$  NMR (100 MHz,  $\text{CDCl}_3$ )  $\delta$  191.1, 163.6, 140.4, 139.8, 139.0, 137.8, 130.7, 130.3, 128.5, 127.2, 127.1, 126.8, 124.5, 118.5, 113.8, 111.2, 79.6, 54.5, 46.1, 41.7, 32.9 (2C), 29.7, 29.3, 26.6, 21.1, 15.5. IR (KBr)  $\nu$  3451, 2959, 1612, 1504, 1188, 1150, 744  $\text{cm}^{-1}$ . HRMS (ESI) calcd for  $\text{C}_{32}\text{H}_{35}\text{N}_2\text{O}$   $[\text{M}+\text{H}]^+$  463.2744, found 463.2750.

## 5. Experimental data for the formation of 6

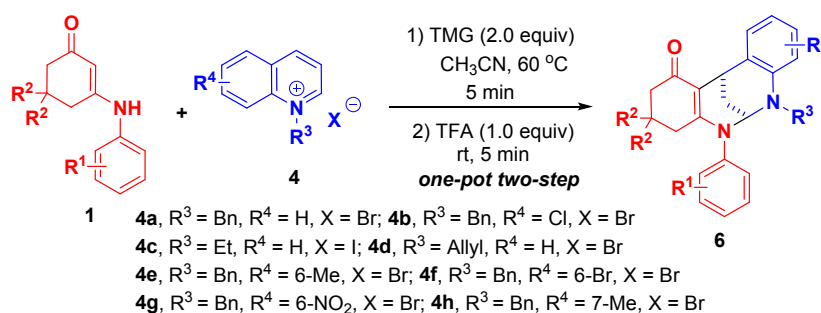

**General procedure:** To a 5.0 mL vial were successively added enaminones **1** (0.15 mmol), *N*-alkyl quinolinium salts **4** (0.33 mmol) and 0.8 mL of  $\text{CH}_3\text{CN}$ . And then, TMG (34.6 mg, 0.30 mmol) was added by syringe. The resulting mixture was stirred at 60 °C for 5 min. Upon completion of the reaction (monitoring by TLC), 0.15 mmol of TFA was added with continuing stirring at room temperature for another 5 min. And then the reaction mixture was directly subjected to flash column chromatography on silica gel (petroleum ether/ ethyl acetate) to afford the corresponding products **6**.

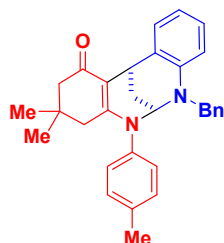

7-benzyl-3,3-dimethyl-5-(*p*-tolyl)-3,4,5,6,7,12-hexahydro-6,12-methanodibenzo[*d,g*][1,3]diazocin-1(2*H*)-one (**6a**)

Yellow solid obtained by column chromatography (petroleum ether/ethyl acetate = 4:1); 78.5 mg, 99% yield; dr > 20:1; reaction time = 5 min; mp 201.3-202.5;  $^1\text{H}$  NMR (400 MHz,  $\text{CDCl}_3$ ),  $\delta$  7.52

(d,  $J = 8.0$  Hz, 1H), 7.21-7.14 (m, 5H), 6.90 (dd,  $J_1 = J_2 = 8.0$  Hz, 4H), 6.89 (t,  $J = 8.0$  Hz, 1H), 6.63 (t,  $J = 8.0$  Hz, 1H), 6.41 (d,  $J = 8.0$  Hz, 1H), 5.15 (s, 1H), 4.49 (d,  $J = 16.0$  Hz, 2H), 4.10 (d,  $J = 20.0$  Hz, 1H), 2.40 (s, 3H), 2.25-2.05 (m, 5H), 1.81 (d,  $J = 16.0$  Hz, 1H), 0.94 (s, 3H), 0.87 (s, 3H);  $^{13}\text{C}$  NMR (100 MHz,  $\text{CDCl}_3$ )  $\delta$  193.0, 155.4, 141.6, 140.6, 138.2, 137.4, 130.2, 128.8, 128.5, 127.8, 126.8, 126.5, 126.0, 117.1, 113.7, 110.8, 73.9, 54.0, 50.0, 41.6, 32.7, 29.6, 26.9 (2C), 16.3, 21.0. IR (KBr)  $\nu$  3419, 2949, 1566, 1501, 1389, 739  $\text{cm}^{-1}$ . HRMS (ESI) calcd for  $\text{C}_{31}\text{H}_{33}\text{N}_2\text{O}$   $[\text{M}+\text{H}]^+$  449.2587, found 449.2589.

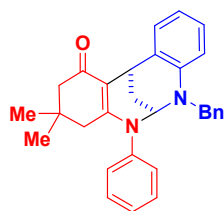

7-benzyl-3,3-dimethyl-5-phenyl-3,4,5,6,7,12-hexahydro-6,12-methanodibenzo[*d,g*][1,3]diazocin-1(2*H*)-one (**6b**)

Yellow solid obtained by column chromatography (petroleum ether/ethyl acetate = 4:1); 61.1 mg, 94% yield; dr > 20:1; reaction time = 5 min; mp 196.2-197.5  $^{\circ}\text{C}$ ;  $^1\text{H}$  NMR (400 MHz,  $\text{CDCl}_3$ ),  $\delta$  7.44 (d,  $J = 8.0$  Hz, 1H), 7.35-7.27 (m, 3H), 7.12 (dd,  $J_1 = J_2 = 8.0$  Hz, 3H), 7.01 (d,  $J = 8.0$  Hz, 2H), 6.92 (d,  $J = 12.0$  Hz, 2H), 6.83 (t,  $J = 8.0$  Hz, 1H), 6.56 (t,  $J = 8.0$  Hz, 1H), 6.34 (d,  $J = 12.0$  Hz, 1H), 5.10 (s, 1H), 4.41 (d,  $J = 24.0$  Hz, 2H), 3.97 (d,  $J = 20.0$  Hz, 1H), 2.16-1.98 (m, 5H), 1.72 (d,  $J = 24.0$  Hz, 1H), 0.86 (s, 3H), 0.79 (s, 3H);  $^{13}\text{C}$  NMR (100 MHz,  $\text{CDCl}_3$ )  $\delta$  193.2, 155.1, 144.3, 140.7, 138.2, 129.7, 128.9, 128.5, 127.8, 127.5, 126.9, 126.6, 126.1, 117.3, 114.1, 110.8, 74.0, 54.0, 50.1, 41.7, 32.8, 29.6, 27.0, 26.9, 26.4. IR (KBr)  $\nu$  3433, 2951, 1568, 1391, 1064, 736  $\text{cm}^{-1}$ . HRMS (ESI) calcd for  $\text{C}_{30}\text{H}_{31}\text{N}_2\text{O}$   $[\text{M}+\text{H}]^+$  435.2431, found 435.2435.

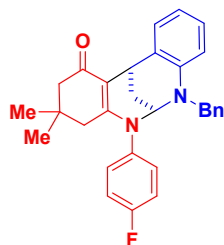

7-benzyl-5-(4-fluorophenyl)-3,3-dimethyl-3,4,5,6,7,12-hexahydro-6,12-methanodibenzo[*d,g*][1,3]diazocin-1(2*H*)-one (**6c**)

Yellow solid obtained by column chromatography (petroleum ether/ethyl acetate = 4:1); 58.7 mg, 87% yield; dr > 20:1; reaction time = 5 min; mp 199.6-200.5  $^{\circ}\text{C}$ ;  $^1\text{H}$  NMR (400 MHz,  $\text{CDCl}_3$ ),  $\delta$

7.42 (d,  $J = 4.0$  Hz, 1H), 7.16-7.09 (m, 3H), 7.03-6.93 (m, 6H), 6.84 (t,  $J = 8.0$  Hz, 1H), 6.56 (t,  $J = 8.0$  Hz, 1H), 6.36 (d,  $J = 8.0$  Hz, 1H), 5.03 (s, 1H), 4.42 (t,  $J = 8.0$  Hz, 2H), 4.01 (d,  $J = 20.0$  Hz, 1H), 2.17-1.95 (m, 5H), 1.69 (d,  $J = 16.0$  Hz, 1H), 0.86 (s, 3H), 0.80 (s, 3H);  $^{13}\text{C}$  NMR (100 MHz,  $\text{CDCl}_3$ )  $\delta$  193.2, 161.5 (d,  $J = 247.0$  Hz, 1C), 154.9, 140.6, 140.2 (d,  $J = 4.0$  Hz, 1C), 138.0, 128.9, 128.5, 127.7, 126.9, 126.6, 126.1, 117.4, 116.6 (d,  $J = 18.0$  Hz, 1C), 114.3, 111.0, 74.1, 54.2, 50.0, 41.7, 32.7, 29.6, 26.9, 26.8, 26.2. IR (KBr)  $\nu$  3396, 2942, 1568, 1497, 1391, 1211, 735  $\text{cm}^{-1}$ . HRMS (ESI) calcd for  $\text{C}_{30}\text{H}_{30}\text{FN}_2\text{O}$   $[\text{M}+\text{H}]^+$  453.2337, found 453.2340.

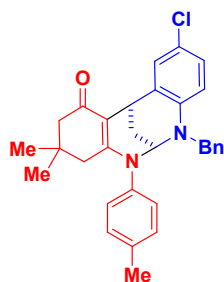

7-benzyl-10-chloro-3,3-dimethyl-5-(*p*-tolyl)-3,4,5,6,7,12-hexahydro-6,12-methanodibenzo[*d,g*][1,3]diazocin-1(2*H*)-one (**6d**)

Yellow solid obtained by column chromatography (petroleum ether/ethyl acetate = 4:1); 67.2 mg, 93% yield; dr > 20:1; reaction time = 5 min; mp 170.2-171.5  $^{\circ}\text{C}$ ;  $^1\text{H}$  NMR (400 MHz,  $\text{CDCl}_3$ )  $\delta$  7.41 (d,  $J = 4.0$  Hz, 1H), 7.17-7.09 (m, 5H), 6.89 (dd,  $J_1 = J_2 = 8.0$  Hz, 4H), 6.74 (dd,  $J_1 = J_2 = 4.0$  Hz, 1H), 6.21 (d,  $J = 8.0$  Hz, 1H), 5.06 (s, 1H), 4.36 (d,  $J = 16.0$  Hz, 2H), 4.02 (d,  $J = 16.0$  Hz, 1H), 2.32 (s, 3H), 2.15-2.10 (m, 3H), 2.05-1.98 (m, 2H), 1.73 (d,  $J = 20.0$  Hz, 1H), 0.86 (s, 3H), 0.80 (s, 3H);  $^{13}\text{C}$  NMR (100 MHz,  $\text{CDCl}_3$ )  $\delta$  192.8, 155.8, 141.3, 139.3, 137.7, 130.4, 129.4, 128.6, 128.3, 127.8, 127.0, 126.3, 126.0, 121.9, 113.0, 111.9, 73.9, 54.3, 49.8, 41.5, 32.7, 29.5, 26.9 (2C), 26.1, 21.0. IR (KBr)  $\nu$  3434, 2950, 1567, 1491, 1393, 698  $\text{cm}^{-1}$ . HRMS (ESI) calcd for  $\text{C}_{31}\text{H}_{32}\text{ClN}_2\text{O}$   $[\text{M}+\text{H}]^+$  483.2198, found 483.2201.

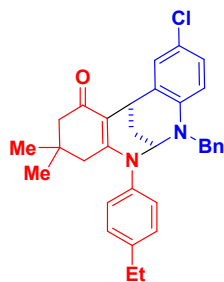

7-benzyl-10-chloro-5-(4-ethylphenyl)-3,3-dimethyl-3,4,5,6,7,12-hexahydro-6,12-methanodibenzo[*d,g*][1,3]diazocin-1(2*H*)-one (**6e**)

Yellow solid obtained by column chromatography (petroleum ether/ethyl acetate = 4:1); 69.2 mg, 93% yield; dr > 20:1; reaction time = 5 min; mp 182.3-184.1 °C; <sup>1</sup>H NMR (400 MHz, CDCl<sub>3</sub>), δ 7.41 (d, *J* = 4.0 Hz, 1H), 7.16-7.09 (m, 5H), 6.90 (d, *J* = 8.0 Hz, 4H), 6.74 (dd, *J*<sub>1</sub> = *J*<sub>2</sub> = 4.0 Hz, 1H), 6.22 (d, *J* = 8.0 Hz, 1H), 5.06 (s, 1H), 4.36 (d, *J* = 16.0 Hz, 2H), 4.02 (d, *J* = 16.0 Hz, 1H), 2.62 (q, *J* = 8.0 Hz, 2H), 2.17-1.98 (m, 5H), 1.76 (d, *J* = 20.0 Hz, 1H), 1.20 (t, *J* = 8.0 Hz, 3H), 0.86 (s, 3H), 0.81 (s, 3H); <sup>13</sup>C NMR (100 MHz, CDCl<sub>3</sub>) δ 192.9, 156.3, 144.0, 141.4, 139.3, 137.7, 129.3, 129.2, 128.6, 128.3, 127.0, 126.3, 126.0, 121.9, 113.0, 112.0, 74.0, 54.3, 49.6, 41.6, 32.7, 29.4, 28.3, 26.9 (2C), 26.1, 15.3. IR (KBr) ν 3422, 2957, 1565, 1498, 1389, 729 cm<sup>-1</sup>. HRMS (ESI) calcd for C<sub>32</sub>H<sub>34</sub>ClN<sub>2</sub>O [M+H]<sup>+</sup> 497.2354, found 493.2356.

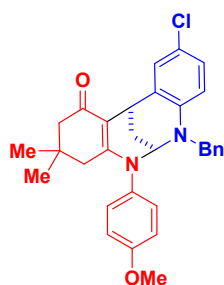

7-benzyl-10-chloro-5-(4-methoxyphenyl)-3,3-dimethyl-3,4,5,6,7,12-hexahydro-6,12-methanodibenzo[*d,g*][1,3]diazocin-1(2*H*)-one (**6f**)

Yellow solid obtained by column chromatography (petroleum ether/ethyl acetate = 4:1); 72.8 mg, 97% yield; dr > 20:1; reaction time = 5 min; mp 175.6-177.0 °C; <sup>1</sup>H NMR (400 MHz, CDCl<sub>3</sub>), δ 7.48 (d, *J* = 4.0 Hz, 1H), 7.25-7.18 (m, 3H), 7.00 (d, *J* = 8.0 Hz, 4H), 6.92 (d, *J* = 8.0 Hz, 2H), 6.83 (d, *J* = 8.0 Hz, 1H), 6.30 (d, *J* = 8.0 Hz, 1H), 5.11 (s, 1H), 4.46 (t, *J* = 8.0 Hz, 2H), 4.11 (d, *J* = 16.0 Hz, 1H), 3.85 (s, 3H), 2.22-2.06 (m, 5H), 1.82 (d, *J* = 16.0 Hz, 1H), 0.94 (s, 3H), 0.89 (s, 3H); <sup>13</sup>C NMR (100 MHz, CDCl<sub>3</sub>) δ 192.8, 158.8, 156.4, 139.2, 137.7, 136.5, 129.4, 128.6, 128.3, 127.0, 126.3, 126.0, 121.9, 114.9, 112.9, 112.0, 74.1, 55.5, 54.4, 49.6, 41.5, 32.6, 29.5, 27.0, 26.8, 26.1. IR (KBr) ν 3417, 2948, 1567, 1501, 1391, 1250, 732 cm<sup>-1</sup>. HRMS (ESI) calcd for C<sub>31</sub>H<sub>32</sub>ClN<sub>2</sub>O<sub>2</sub> [M+H]<sup>+</sup> 499.2147, found 499.2145.

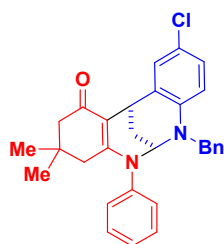

7-benzyl-10-chloro-3,3-dimethyl-5-phenyl-3,4,5,6,7,12-hexahydro-6,12-



methanodibenzo[*d,g*][1,3]diazocin-1(2*H*)-one (**6g**)

Yellow solid obtained by column chromatography (petroleum ether/ethyl acetate = 4:1); 60.7 mg, 86% yield; dr > 20:1; reaction time = 5 min; mp 161.2-162.0 °C; <sup>1</sup>H NMR (400 MHz, CDCl<sub>3</sub>), δ 7.49 (d, *J* = 4.0 Hz, 1H), 7.43-7.35 (m, 3H), 7.24-7.16 (m, 3H), 7.08 (d, *J* = 4.0 Hz, 2H), 6.98 (d, *J* = 8.0 Hz, 2H), 6.83 (dd, *J*<sub>1</sub> = *J*<sub>2</sub> = 4.0 Hz, 1H), 6.31 (d, *J* = 8.0 Hz, 1H), 5.17 (s, 1H), 4.44 (d, *J* = 16.0 Hz, 2H), 4.06 (d, *J* = 16.0 Hz, 1H), 2.24-2.07 (m, 5H), 1.82 (d, *J* = 20.0 Hz, 1H), 0.94 (s, 3H), 0.89 (s, 3H); <sup>13</sup>C NMR (100 MHz, CDCl<sub>3</sub>) δ 193.0, 155.4, 144.0, 139.3, 137.6, 129.8, 129.3, 128.6, 128.3, 127.7, 127.0, 126.3, 126.0, 122.0, 113.4, 112.0, 73.9, 54.2, 49.9, 41.6, 32.8, 29.5, 26.9 (2C), 26.1. IR (KBr) ν 3434, 2950, 1567, 1491, 1393, 698 cm<sup>-1</sup>. HRMS (ESI) calcd for C<sub>30</sub>H<sub>30</sub>ClN<sub>2</sub>O [M+H]<sup>+</sup> 469.2041, found 469.2046.

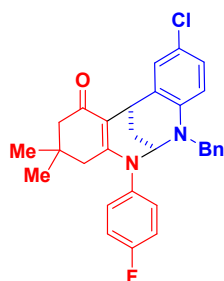

7-benzyl-10-chloro-5-(4-fluorophenyl)-3,3-dimethyl-3,4,5,6,7,12-hexahydro-6,12-methanodibenzo[*d,g*][1,3]diazocin-1(2*H*)-one (**6h**)

Yellow solid obtained by column chromatography (petroleum ether/ethyl acetate = 4:1); 73.6 mg, 99% yield; dr > 20:1; reaction time = 5 min; mp 195.2-196.2 °C; <sup>1</sup>H NMR (400 MHz, CDCl<sub>3</sub>), δ 7.48 (d, *J* = 8.0 Hz, 1H), 7.24-7.19 (m, 3H), 7.12-7.05 (m, 4H), 7.00 (d, *J* = 4.0 Hz, 2H), 6.84 (d, *J* = 8.0 Hz, 1H), 6.32 (d, *J* = 8.0 Hz, 1H), 5.10 (s, 1H), 4.46 (t, *J* = 8.0 Hz, 2H), 4.10 (d, *J* = 20.0 Hz, 1H), 2.23-2.04 (m, 5H), 1.78 (d, *J* = 16.0 Hz, 1H), 0.95 (s, 3H), 0.89 (s, 3H); <sup>13</sup>C NMR (100 MHz, CDCl<sub>3</sub>) δ 193.1, 161.6 (d, *J* = 248.0 Hz, 1C), 155.1, 139.9 (d, *J* = 4.0 Hz, 1C), 139.2, 137.5, 129.3, 128.7, 128.4, 127.1, 126.4, 126.0, 122.2, 116.7 (d, *J* = 17.0 Hz, 1C), 113.7, 112.2, 74.1, 54.5, 49.9, 41.7, 32.8, 29.5, 27.0, 26.8, 26.1. IR (KBr) ν 3435, 2946, 1569, 1498, 1392, 736 cm<sup>-1</sup>. HRMS (ESI) calcd for C<sub>30</sub>H<sub>29</sub>ClFN<sub>2</sub>O [M+H]<sup>+</sup> 487.1947, found 487.1948.

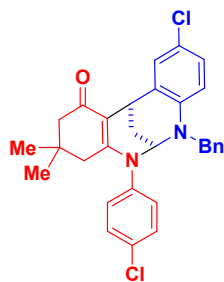

7-benzyl-10-chloro-5-(4-chlorophenyl)-3,3-dimethyl-3,4,5,6,7,12-hexahydro-6,12-methanodibenzo[*d,g*][1,3]diazocin-1(2*H*)-one (**6i**)

Yellow solid obtained by column chromatography (petroleum ether/ethyl acetate = 4:1); 69.9 mg, 93% yield; dr > 20:1; reaction time = 5 min; mp 188.6-189.3 °C; <sup>1</sup>H NMR (400 MHz, CDCl<sub>3</sub>), δ 7.47 (s, 1H), 7.37 (d, *J* = 8.0 Hz, 2H), 7.22 (dd, *J*<sub>1</sub> = *J*<sub>2</sub> = 8.0 Hz, 3H), 7.00 (d, *J* = 8.0 Hz, 4H), 6.84 (d, *J* = 8.0 Hz, 1H), 6.33 (d, *J* = 8.0 Hz, 1H), 5.12 (s, 1H), 4.45 (d, *J* = 16.0 Hz, 2H), 4.12 (d, *J* = 20.0 Hz, 1H), 2.23-2.04 (m, 5H), 1.79 (d, *J* = 16.0 Hz, 1H), 0.94 (s, 3H), 0.89 (s, 3H); <sup>13</sup>C NMR (100 MHz, CDCl<sub>3</sub>) δ 193.1, 154.6, 142.5, 139.2, 137.5, 133.4, 129.9, 129.3, 128.6, 128.4, 127.1, 126.4, 126.0, 122.2, 114.0, 112.2, 74.0, 54.5, 49.9, 41.7, 32.8, 29.5, 26.9, 26.8, 26.0. IR (KBr) ν 3441, 2945, 1569, 1490, 1391, 735 cm<sup>-1</sup>. HRMS (ESI) calcd for C<sub>30</sub>H<sub>29</sub>Cl<sub>2</sub>N<sub>2</sub>O [M+H]<sup>+</sup> 503.1652, found 503.1655.

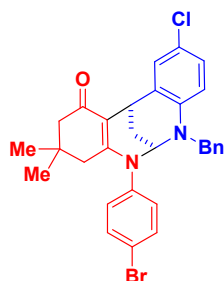

7-benzyl-5-(4-bromophenyl)-10-chloro-3,3-dimethyl-3,4,5,6,7,12-hexahydro-6,12-methanodibenzo[*d,g*][1,3]diazocin-1(2*H*)-one (**6j**)

Yellow solid obtained by column chromatography (petroleum ether/ethyl acetate = 4:1); 75.4 mg, 92% yield; dr > 20:1; reaction time = 5 min; mp 205.7-207.1 °C; <sup>1</sup>H NMR (400 MHz, CDCl<sub>3</sub>), δ 7.52 (d, *J* = 8.0 Hz, 2H), 7.47 (d, *J* = 4.0 Hz, 1H), 7.25-7.19 (m, 3H), 6.99 (d, *J* = 8.0 Hz, 2H), 6.94 (d, *J* = 8.0 Hz, 2H), 6.84 (d, *J* = 8.0 Hz, 1H), 6.33 (d, *J* = 8.0 Hz, 1H), 5.12 (s, 1H), 4.45 (t, *J* = 8.0 Hz, 2H), 4.12 (d, *J* = 16.0 Hz, 1H), 2.21-2.04 (m, 5H), 1.19 (d, *J* = 16.0 Hz, 1H), 0.94 (s, 3H), 0.89 (s, 3H); <sup>13</sup>C NMR (100 MHz, CDCl<sub>3</sub>) δ 193.2, 154.8, 142.9, 139.2, 137.4, 132.9, 129.2, 128.7, 128.4, 127.1, 126.4, 126.1, 122.2, 121.4, 114.0, 112.3, 74.0, 54.5, 49.8, 41.7, 32.8, 29.5,

26.9, 26.8, 25.9. IR (KBr)  $\nu$  3429, 2950, 1618, 1562, 1486, 1385, 1067, 730  $\text{cm}^{-1}$ . HRMS (ESI) calcd for  $\text{C}_{30}\text{H}_{29}\text{BrClN}_2\text{O}$   $[\text{M}+\text{H}]^+$  547.1146, found 547.1150.

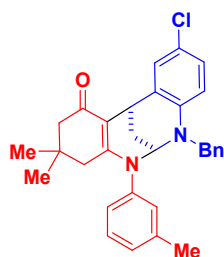

7-benzyl-10-chloro-3,3-dimethyl-5-(*m*-tolyl)-3,4,5,6,7,12-hexahydro-6,12-methanodibenzo[*d,g*][1,3]diazocin-1(2*H*)-one (**6k**)

Yellow solid obtained by column chromatography (petroleum ether/ethyl acetate = 4:1); 68.9 mg, 95% yield; dr > 20:1; reaction time = 5 min; mp 187.6-188.0 °C;  $^1\text{H}$  NMR (400 MHz,  $\text{CDCl}_3$ ),  $\delta$  7.46 (d,  $J$  = 4.0 Hz, 1H), 7.36 (t,  $J$  = 8.0 Hz, 1H), 7.28-7.18 (m, 4H), 6.96-6.88 (m, 5H), 6.38 (d,  $J$  = 8.0 Hz, 1H), 5.27 (s, 1H), 4.49 (t,  $J$  = 8.0 Hz, 2H), 4.07 (d,  $J$  = 20.0 Hz, 1H), 2.50-2.39 (m, 5H), 2.27 (d,  $J$  = 12.0 Hz, 1H), 2.17 (dd,  $J_1$  = 12.0 Hz,  $J_2$  = 8.0 Hz, 2H), 1.92 (d,  $J$  = 16.0 Hz, 1H), 0.98 (s, 3H), 0.93 (s, 3H);  $^{13}\text{C}$  NMR (100 MHz,  $\text{CDCl}_3$ )  $\delta$  192.0, 163.2, 160.2, 159.8, 142.6, 138.6, 137.0, 129.7, 128.7, 128.6, 128.3, 127.3, 127.0, 126.1, 122.7, 117.0, 114.2, 112.8, 111.9, 74.9, 54.7, 46.4, 41.7, 32.8, 29.1, 26.8, 26.0, 21.2. IR (KBr)  $\nu$  3432, 2960, 1496, 1207, 1148, 802  $\text{cm}^{-1}$ . HRMS (ESI) calcd for  $\text{C}_{31}\text{H}_{32}\text{ClN}_2\text{O}$   $[\text{M}+\text{H}]^+$  483.2198, found 483.2185.

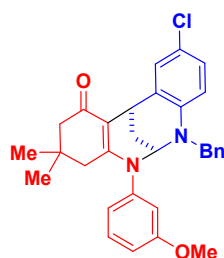

7-benzyl-10-chloro-5-(3-methoxyphenyl)-3,3-dimethyl-3,4,5,6,7,12-hexahydro-6,12-methanodibenzo[*d,g*][1,3]diazocin-1(2*H*)-one (**6l**)

Yellow solid obtained by column chromatography (petroleum ether/ethyl acetate = 4:1); 59.2 mg, 79% yield; dr > 20:1; reaction time = 5 min; mp 179.6-180.4 °C;  $^1\text{H}$  NMR (400 MHz,  $\text{CDCl}_3$ ),  $\delta$  7.48 (d,  $J$  = 4.0 Hz, 1H), 7.33-7.18 (m, 4H), 7.01 (d,  $J$  = 8.0 Hz, 2H), 6.90 (d,  $J$  = 8.0 Hz, 1H), 6.84 (dd,  $J_1 = J_2 = 4.0$  Hz, 1H), 6.67 (d,  $J$  = 12.0 Hz, 1H), 6.59 (s, 1H), 6.30 (d,  $J$  = 12.0 Hz, 1H), 5.17 (s, 1H), 4.47 (d,  $J$  = 20.0 Hz, 2H), 4.17 (d,  $J$  = 24.0 Hz, 1H), 3.76 (s, 3H), 2.21-2.04 (m, 5H),

1.87 (d,  $J = 20.0$  Hz, 1H), 0.95 (s, 3H), 0.90 (s, 3H);  $^{13}\text{C}$  NMR (100 MHz,  $\text{CDCl}_3$ )  $\delta$  193.1, 160.6, 155.5, 145.1, 139.3, 137.7, 130.4, 129.3, 128.6, 128.4, 127.0, 126.4, 126.0, 122.0, 120.4, 113.9, 113.4, 113.2, 112.0, 73.9, 55.4, 54.3, 49.8, 41.6, 32.8, 29.4, 27.0, 26.1. IR (KBr)  $\nu$  3419, 2949, 1605, 1562, 1489, 1392, 698  $\text{cm}^{-1}$ . HRMS (ESI) calcd for  $\text{C}_{31}\text{H}_{32}\text{ClN}_2\text{O}_2$   $[\text{M}+\text{H}]^+$  499.2147, found 499.2149.

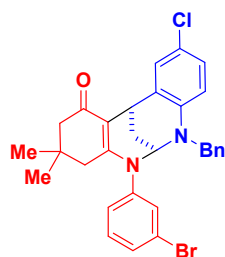

7-benzyl-5-(3-bromophenyl)-10-chloro-3,3-dimethyl-3,4,5,6,7,12-hexahydro-6,12-methanodibenzo[*d,g*][1,3]diazocin-1(2*H*)-one (**6m**)

Yellow solid obtained by column chromatography (petroleum ether/ethyl acetate = 4:1); 81.9 mg, 99% yield; dr > 20:1; reaction time = 5 min; mp 200.0-200.9 °C;  $^1\text{H}$  NMR (400 MHz,  $\text{CDCl}_3$ ),  $\delta$  7.51 (d,  $J = 8.0$  Hz, 1H), 7.46 (d,  $J = 4.0$  Hz, 1H), 7.30 (t,  $J = 8.0$  Hz, 1H), 7.24-7.19 (m, 4H), 7.01 (dd,  $J_1 = J_2 = 8.0$  Hz, 3H), 6.83 (dd,  $J_1 = J_2 = 4.0$  Hz, 1H), 6.36 (d,  $J = 8.0$  Hz, 1H), 5.17 (s, 1H), 4.46 (d,  $J = 20.0$  Hz, 2H), 4.13 (d,  $J = 16.0$  Hz, 1H), 2.23-2.06 (m, 5H), 1.84 (d,  $J = 16.0$  Hz, 1H), 0.96 (s, 3H), 0.90 (s, 3H);  $^{13}\text{C}$  NMR (100 MHz,  $\text{CDCl}_3$ )  $\delta$  193.4, 156.3, 144.8, 139.0, 137.1, 131.0, 128.8, 128.6, 128.2, 127.1, 126.8, 126.8, 126.4, 126.0, 123.1, 122.1, 113.6, 112.3, one carbon missing in the aromatic region, 74.1, 54.4, 49.0, 41.5, 32.8, 29.3, 26.8, 25.8. IR (KBr)  $\nu$  3434, 2953, 1565, 1485, 1387, 1158, 732  $\text{cm}^{-1}$ . HRMS (ESI) calcd for  $\text{C}_{30}\text{H}_{29}\text{BrClN}_2\text{O}$   $[\text{M}+\text{H}]^+$  547.1146, found 547.1146.

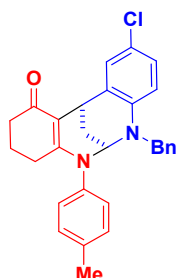

7-benzyl-10-chloro-5-(*p*-tolyl)-3,4,5,6,7,12-hexahydro-6,12-methanodibenzo[*d,g*][1,3]diazocin-1(2*H*)-one (**6n**)

Yellow solid obtained by column chromatography (petroleum ether/ethyl acetate = 4:1); 60.5 mg,

89% yield; dr > 20:1; reaction time = 5 min; mp 174.7-175.9 °C; <sup>1</sup>H NMR (400 MHz, CDCl<sub>3</sub>), δ 7.52 (d, *J* = 4.0 Hz, 1H), 7.23-7.17 (m, 5H), 6.99 (d, *J* = 8.0 Hz, 4H), 6.83 (dd, *J*<sub>1</sub> = *J*<sub>2</sub> = 4.0 Hz, 1H), 6.30 (d, *J* = 8.0 Hz, 1H), 5.14 (s, 1H), 4.45 (t, *J* = 8.0 Hz, 2H), 4.12 (d, *J* = 16.0 Hz, 1H), 2.39 (s, 3H), 2.32-2.27 (m, 2H), 2.24-2.17 (m, 2H), 2.10-2.07 (m, 1H), 1.98 (tt, *J*<sub>1</sub> = *J*<sub>2</sub> = 4.0 Hz, 1H), 1.80 (q, *J* = 8.0 Hz, 2H); <sup>13</sup>C NMR (100 MHz, CDCl<sub>3</sub>) δ 193.3, 157.3, 141.4, 139.4, 137.7, 137.7, 130.3, 129.5, 128.6, 128.5, 126.9, 126.2, 125.9, 121.8, 114.1, 111.8, one carbon missing in the aromatic region, 73.6, 54.2, 36.3, 28.0, 27.0, 26.1, 22.0, 21.0. IR (KBr) ν 3422, 2948, 1554, 1496, 1385, 723 cm<sup>-1</sup>. HRMS (ESI) calcd for C<sub>29</sub>H<sub>27</sub>ClN<sub>2</sub>O [M+H]<sup>+</sup> 455.1885, found 455.1881.

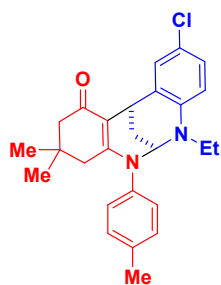

10-chloro-7-ethyl-3,3-dimethyl-5-(*p*-tolyl)-3,4,5,6,7,12-hexahydro-6,12-methanodibenzo[*d,g*][1,3]diazocin-1(2*H*)-one (**6o**)

Yellow solid obtained by column chromatography (petroleum ether/ethyl acetate = 4:1); 55.7 mg, 88% yield; dr > 20:1; reaction time = 5 min; mp 190.9-192.3 °C; <sup>1</sup>H NMR (400 MHz, CDCl<sub>3</sub>), δ 7.43 (d, *J* = 4.0 Hz, 1H), 7.23 (d, *J* = 12.0 Hz, 2H), 7.00-6.94 (m, 3H), 6.49 (d, *J* = 12.0 Hz, 1H), 5.03 (s, 1H), 4.38 (s, 1H), 3.42-3.30 (m, 1H), 2.83-2.71 (m, 1H), 2.40 (s, 3H), 2.20 (s, 2H), 2.09-1.91 (m, 3H), 1.80 (d, *J* = 20.0 Hz, 1H), 0.94 (t, *J* = 8.0 Hz, 6H), 0.84 (s, 3H); <sup>13</sup>C NMR (100 MHz, CDCl<sub>3</sub>) δ 192.7, 157.4, 140.8, 138.7, 137.9, 130.4, 129.4, 128.5, 126.4, 121.3, 112.5, 111.4, 73.6, 49.0, 45.4, 41.5, 32.7, 29.5, 26.8 (2C), 26.1, 21.1, 12.2. IR (KBr) ν 3422, 2967, 1498, 1191, 1149, 799 cm<sup>-1</sup>. HRMS (ESI) calcd for C<sub>26</sub>H<sub>30</sub>ClN<sub>2</sub>O [M+H]<sup>+</sup> 421.2041, found 421.2044.

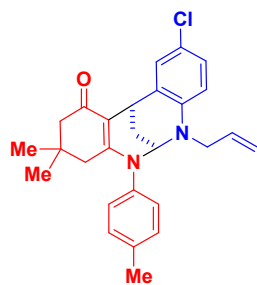

7-allyl-10-chloro-3,3-dimethyl-5-(*p*-tolyl)-3,4,5,6,7,12-hexahydro-6,12-methanodibenzo[*d,g*][1,3]diazocin-1(2*H*)-one (**6p**)

Yellow solid obtained by column chromatography (petroleum ether/ethyl acetate = 4:1); 56.9 mg, 88% yield; dr > 20:1; reaction time = 5 min; mp 180.5-181.7 °C; <sup>1</sup>H NMR (400 MHz, CDCl<sub>3</sub>) δ 7.43 (s, 1H), 7.30 (d, *J* = 8.0 Hz, 2H), 6.99 (d, *J* = 8.0 Hz, 3H), 6.48 (d, *J* = 8.0 Hz, 1H), 5.63-5.53 (m, 1H), 5.16 (s, 1H), 5.04 (d, *J* = 12.0 Hz, 1H), 4.91 (d, *J* = 16.0 Hz, 1H), 4.45 (s, 1H), 3.92 (dd, *J*<sub>1</sub> = *J*<sub>2</sub> = 4.0 Hz, 1H), 3.38 (dd, *J*<sub>1</sub> = *J*<sub>2</sub> = 4.0 Hz, 1H), 2.49-2.36 (m, 5H), 2.15 (d, *J* = 20.0 Hz, 3H), 1.91 (d, *J* = 16.0 Hz, 1H), 0.97 (s, 3H), 0.90 (s, 3H); <sup>13</sup>C NMR (100 MHz, CDCl<sub>3</sub>) δ 191.6, 163.6, 139.9, 139.2, 138.4, 132.4, 130.8, 128.5, 128.1, 126.9, 122.4, 116.5, 112.6, 111.7, 74.5, 74.5, 53.3, 46.3, 46.2, 41.6, 32.8, 29.1, 26.7, 25.9, 21.1. IR (KBr) ν 3433, 2966, 1766, 1500, 1193, 1148, 801 cm<sup>-1</sup>. HRMS (ESI) calcd for C<sub>27</sub>H<sub>30</sub>ClN<sub>2</sub>O [M+H]<sup>+</sup> 433.2041, found 433.2042.

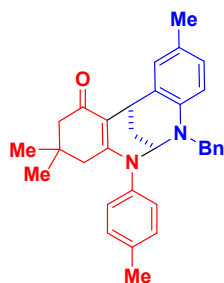

7-benzyl-3,3,10-trimethyl-5-(*p*-tolyl)-3,4,5,6,7,12-hexahydro-6,12-methanodibenzo[*d,g*][1,3]diazocin-1(2*H*)-one (**6q**)

Yellow solid obtained by column chromatography (petroleum ether/ethyl acetate = 4:1); 69.3 mg, 99% yield; dr > 20:1; reaction time = 5 min; mp 177.0-177.9 °C; <sup>1</sup>H NMR (400 MHz, CDCl<sub>3</sub>) δ 7.13 (t, *J* = 8.0 Hz, 6H), 6.90 (t, *J* = 12.0 Hz, 4H), 6.66 (t, *J* = 12.0 Hz, 1H), 6.25 (t, *J* = 12.0 Hz, 1H), 5.08 (s, 1H), 4.40 (t, *J* = 8.0 Hz, 2H), 3.95 (d, *J* = 20.0 Hz, 1H), 2.32 (s, 3H), 2.19-1.96 (m, 8H), 1.72 (d, *J* = 20.0 Hz, 1H), 0.86 (s, 3H), 0.80 (s, 3H); <sup>13</sup>C NMR (100 MHz, CDCl<sub>3</sub>) δ 192.8, 157.5, 141.3, 138.3, 138.1, 137.8, 130.4, 129.6, 128.5, 127.6, 127.2, 126.8, 126.5, 126.1, 113.3, 111.1, 74.3, 54.3, 49.1, 41.7, 32.8, 29.7, 26.8, 26.7, 26.5, 21.1, 20.2. IR (KBr) ν 3431, 2949, 1565, 1505, 1390, 731 cm<sup>-1</sup>. HRMS (ESI) calcd for C<sub>32</sub>H<sub>35</sub>N<sub>2</sub>O [M+H]<sup>+</sup> 463.2744, found 463.2743.

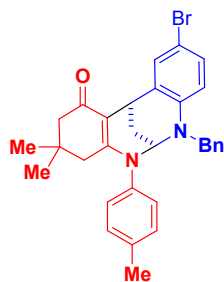

7-benzyl-10-bromo-3,3-dimethyl-5-(*p*-tolyl)-3,4,5,6,7,12-hexahydro-6,12-

methanodibenzo[*d,g*][1,3]diazocin-1(2*H*)-one (**6r**)

Yellow solid obtained by column chromatography (petroleum ether/ethyl acetate = 4:1); 70.3 mg, 89% yield; dr > 20:1; reaction time = 5 min; mp 184.0-185.1 °C; <sup>1</sup>H NMR (400 MHz, CDCl<sub>3</sub>), δ 7.59 (d, *J* = 4.0 Hz, 1H), 7.28-7.20 (m, 5H), 7.04-6.95 (m, 5H), 6.31 (d, *J* = 8.0 Hz, 1H), 5.23 (s, 1H), 4.48 (t, *J* = 12.0 Hz, 2H), 4.04 (d, *J* = 16.0 Hz, 1H), 2.49-2.36 (m, 5H), 2.26 (dd, *J*<sub>1</sub> = *J*<sub>2</sub> = 4.0 Hz, 1H), 2.17-2.13 (m, 2H), 1.88 (d, *J* = 20.0 Hz, 1H), 0.96 (s, 3H), 0.91 (s, 3H); <sup>13</sup>C NMR (100 MHz, CDCl<sub>3</sub>) δ 192.5, 162.8, 140.2, 139.1, 139.1, 137.1, 131.4, 129.9, 128.8, 128.8, 127.3, 126.0, 113.2, 112.1, 110.1, 74.9, 54.7, 46.6, 41.7, 32.9, 29.2, 26.8, 26.6, 26.1, 21.2. IR (KBr) ν 3429, 2958, 1496, 1189, 1135, 795 cm<sup>-1</sup>. HRMS (ESI) calcd for C<sub>31</sub>H<sub>32</sub>BrN<sub>2</sub>O [M+H]<sup>+</sup> 527.1693, found 527.1692.

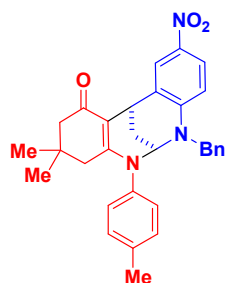

7-benzyl-3,3-dimethyl-10-nitro-5-(*p*-tolyl)-3,4,5,6,7,12-hexahydro-6,12-methanodibenzo[*d,g*][1,3]diazocin-1(2*H*)-one (**6s**)

Yellow solid obtained by column chromatography (petroleum ether/ethyl acetate = 4:1); 66.0 mg, 89% yield; dr > 20:1; reaction time = 5 min; mp 197.7-198.6 °C; <sup>1</sup>H NMR (400 MHz, CDCl<sub>3</sub>), δ 8.36 (d, *J* = 4.0 Hz, 1H), 7.78 (*J*<sub>1</sub> = *J*<sub>2</sub> = 4.0 Hz, 1H), 7.29-7.22 (m, 5H), 7.00 (dd, *J*<sub>1</sub> = *J*<sub>2</sub> = 4.0 Hz, 4H), 6.39 (d, *J* = 8.0 Hz, 1H), 5.22 (s, 1H), 4.63 (d, *J* = 20.0 Hz, 1H), 4.54 (s, 1H), 4.27 (d, *J* = 20.0 Hz, 1H), 2.42 (s, 3H), 2.19-2.04 (m, 5H), 1.87 (d, *J* = 16.0 Hz, 1H), 0.95 (s, 3H), 0.90 (s, 3H); <sup>13</sup>C NMR (100 MHz, CDCl<sub>3</sub>) δ 193.1, 155.3, 146.6, 140.9, 138.1, 138.1, 136.3, 130.6, 128.8, 127.7, 127.4, 125.8, 124.3, 123.5, 112.6, 109.9, one carbon missing in the aromatic region, 73.8, 54.4, 49.7, 41.4, 32.6, 29.4, 27.0, 25.7, 21.0. IR (KBr) ν 3434, 2958, 1574, 1498, 1320, 719 cm<sup>-1</sup>. HRMS (ESI) calcd for C<sub>31</sub>H<sub>32</sub>N<sub>3</sub>O<sub>3</sub> [M+H]<sup>+</sup> 494.2438, found 494.2430.

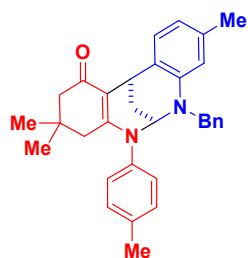

7-benzyl-3,3,9-trimethyl-5-(*p*-tolyl)-3,4,5,6,7,12-hexahydro-6,12-methanodibenzo[*d,g*][1,3]diazocin-1(2*H*)-one (**6t**)

Yellow solid obtained by column chromatography (petroleum ether/ethyl acetate = 4:1); 66.3 mg, 96% yield; dr > 20:1; reaction time = 5 min; mp 188.1-189.2 °C; <sup>1</sup>H NMR (400 MHz, CDCl<sub>3</sub>) δ 7.39 (d, *J* = 8.0 Hz, 1H), 7.24-7.18 (m, 5H), 6.98 (d, *J* = 8.0 Hz, 4H), 6.52 (d, *J* = 8.0 Hz, 1H), 6.33 (s, 1H), 5.21 (s, 1H), 4.53 (d, *J* = 16.0 Hz, 2H), 4.00 (d, *J* = 20.0 Hz, 1H), 2.43 (t, *J* = 12.0 Hz, 4H), 2.36 (d, *J* = 20.0 Hz, 1H), 2.26 (tt, *J*<sub>1</sub> = *J*<sub>2</sub> = 4.0 Hz, 1H), 2.15 (s, 3H), 2.13-2.08 (m, 2H), 1.86 (d, *J* = 16.0 Hz, 1H), 0.95 (s, 3H), 0.89 (s, 3H); <sup>13</sup>C NMR (100 MHz, CDCl<sub>3</sub>) δ 191.8, 162.4, 140.5, 140.0, 138.8, 137.8, 136.8, 130.7, 130.7, 129.0, 128.6, 127.0, 126.2, 124.1, 118.8, 112.9, 112.1, 74.8, 54.2, 46.7, 41.7, 32.8, 29.4, 26.7, 26.3, 21.6, 21.1. IR (KBr) ν 3424, 2955, 1569, 1509, 1189, 1144, 726 cm<sup>-1</sup>. HRMS (ESI) calcd for C<sub>32</sub>H<sub>35</sub>N<sub>2</sub>O [M+H]<sup>+</sup> 463.2744, found 463.2743.

## 6. Optimization of reaction conditions for the formation of 10a

Table S2. Optimization of conditions for the formation of **10a**<sup>a</sup>

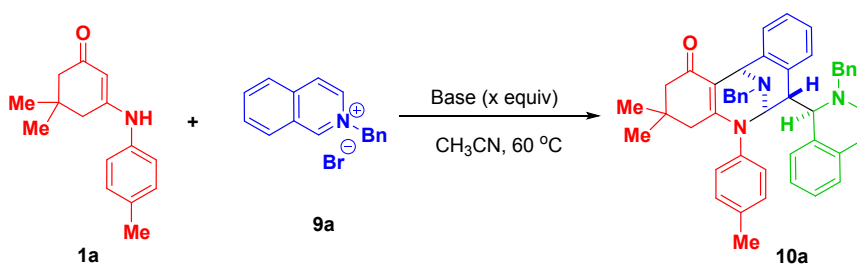

| entry | base                    | x   | Time (min) | Yield (%) <sup>b</sup> |
|-------|-------------------------|-----|------------|------------------------|
| 1     | TMG                     | 2.0 | 10         | 36                     |
| 2     | DBU                     | 2.0 | 10         | 57 <sup>c</sup>        |
| 3     | DABCO·6H <sub>2</sub> O | 2.0 | 10         | 27                     |
| 4     | DBU                     | 1.0 | 10         | 48                     |
| 5     | DBU                     | 2.6 | 5          | 79 <sup>c</sup>        |
| 6     | DBU                     | 3.0 | 5          | 83 <sup>c</sup>        |



<sup>a</sup> Unless otherwise noted, the reactions were conducted with 0.15 mmol enaminone **1a**, 2.2 equivalent of isoquinolinium salt **9a** in 0.8 mL of CH<sub>3</sub>CN at 60 °C. Only one diastereoisomer was obtained for all cases. <sup>b</sup> Isolated yields obtained by column chromatography. <sup>c</sup> Isolated yields obtained by filtration of the precipitate.

## 7. Experimental data for the formation of **10**

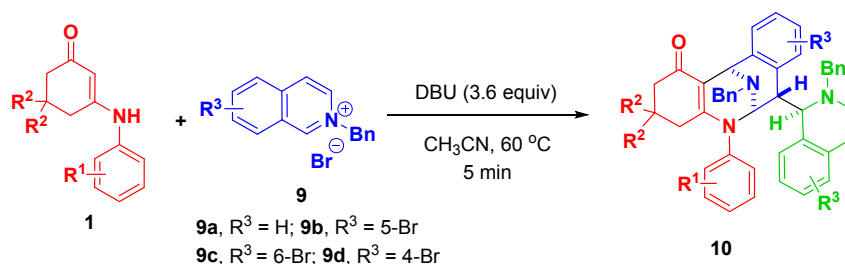

**General procedure:** To a 5.0 mL vial were successively added enaminones **1** (0.15 mmol), *N*-alkyl isoquinolinium salts **9** (0.33 mmol) and 0.8 mL of CH<sub>3</sub>CN. And then, DBU (82.2 mg, 0.54 mmol) was added by syringe. The resulting mixture was stirred at 60 °C for 5 min. Upon completion of the reaction (monitoring by TLC), most of the products **10** were precipitated from the reaction mixtures and only a filtration was needed to purify them. For products **10d**, **10l**, **10n** and **10o**, they could not be precipitated from the reaction systems, which were purified by silica gel column chromatography. When 4-bromosubstituted isoquinolinium salt **9d** was employed as substrate, only mono-isoquinoline functionalized bridged cyclic compound **10p** was afforded in 54% yield.

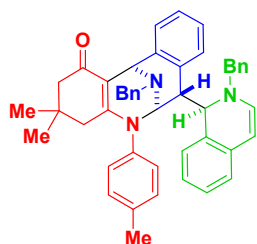

13-benzyl-7-(2-benzyl-1,2-dihydroisoquinolin-1-yl)-3,3-dimethyl-5-(*p*-tolyl)-3,4,5,6,7,12-hexahydro-6,12-epiminodibenzo[*b,e*]azocin-1(*2H*)-one (**10a**)

White solid obtained by filtration of the precipitate; 93.9 mg, 94% yield; dr > 20:1; reaction time = 5 min; mp 175.2-175.7 °C; <sup>1</sup>H NMR (400 MHz, CDCl<sub>3</sub>), δ 7.50 (d, *J* = 4.0 Hz, 1H), 7.21-7.12 (m, 12H), 6.95-6.86 (m, 5H), 6.70-6.49 (m, 4H), 6.18 (d, *J* = 4.0 Hz, 1H), 5.25 (t, *J* = 8.0 Hz, 3H), 4.66 (s, 1H), 4.30 (d, *J* = 8.0 Hz, 1H), 3.81 (d, *J* = 16.0 Hz, 1H), 3.67 (d, *J* = 16.0 Hz, 1H), 3.55 (d,

$J = 12.0$  Hz, 1H), 3.33 (d,  $J = 16.0$  Hz, 1H), 2.93 (d,  $J = 16.0$  Hz, 1H), 2.26 (s, 3H), 2.12 (d,  $J = 12.0$  Hz, 2H), 1.77 (d,  $J = 16.0$  Hz, 1H), 1.02 (s, 3H), 0.81 (s, 3H);  $^{13}\text{C}$  NMR (100 MHz,  $\text{CDCl}_3$ )  $\delta$  192.1, 154.5, 141.0, 138.3, 138.2, 137.8, 136.7, 136.6, 132.5, 131.1, 129.7, 129.4, 128.4, 128.3, 127.5, 127.3, 127.1, 126.8, 126.7, 126.5, 126.0, 125.4, 125.3, 123.5, 122.2, 105.8, 99.8, 96.4, 74.9, 61.5, 58.0, 57.2, 52.2, 49.8, 45.7, 41.0, 33.1, 29.6, 27.4, 20.9. IR (KBr)  $\nu$  3441, 1611, 1565, 1391, 756  $\text{cm}^{-1}$ . HRMS (ESI) calcd for  $\text{C}_{47}\text{H}_{46}\text{N}_3\text{O}$   $[\text{M}+\text{H}]^+$  668.3635, found 668.3635.

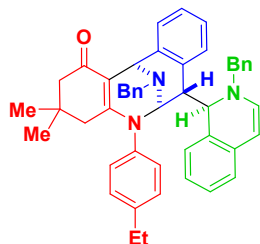

13-benzyl-7-(2-benzyl-1,2-dihydroisoquinolin-1-yl)-5-(4-ethylphenyl)-3,3-dimethyl-3,4,5,6,7,12-hexahydro-6,12-epiminodibenzo[*b,e*]azocin-1(2*H*)-one (**10b**)

White solid obtained by filtration of the precipitate; 94.3 mg, 92% yield; dr > 20:1; reaction time = 5 min; mp 173.6-174.4  $^{\circ}\text{C}$ ;  $^1\text{H}$  NMR (400 MHz,  $\text{CDCl}_3$ ),  $\delta$  7.51 (d,  $J = 8.0$  Hz, 1H), 7.24-7.13 (m, 11H), 6.97-6.84 (m, 5H), 6.68-6.48 (m, 4H), 6.19 (d,  $J = 8.0$  Hz, 1H), 5.25 (d,  $J = 8.0$  Hz, 2H), 5.19 (d,  $J = 8.0$  Hz, 1H), 4.64 (s, 1H), 4.26 (d,  $J = 8.0$  Hz, 1H), 3.82 (d,  $J = 16.0$  Hz, 1H), 3.67 (d,  $J = 16.0$  Hz, 1H), 3.55 (d,  $J = 12.0$  Hz, 1H), 3.32 (d,  $J = 16.0$  Hz, 1H), 2.90 (d,  $J = 8.0$  Hz, 1H), 2.55 (q,  $J = 8.0$  Hz, 2H), 2.13 (d,  $J = 12.0$  Hz, 3H), 1.79 (d,  $J = 16.0$  Hz, 1H), 1.18 (t,  $J = 8.0$  Hz, 3H), 1.03 (s, 3H), 0.81 (s, 3H);  $^{13}\text{C}$  NMR (100 MHz,  $\text{CDCl}_3$ )  $\delta$  192.1, 154.5, 142.9, 141.0, 138.3 (2C), 137.9, 136.7, 132.5, 131.2, 129.8, 129.4, 128.4 (2C), 127.5, 127.3, 127.1, 126.8, 126.6, 126.5, 126.0, 125.4, 125.3, 123.5, 122.2, 105.7, 96.4, 74.8, 61.5, 58.1, 57.2, 52.3, 49.9, 45.6, 41.0, 33.1, 29.6, 28.3, 27.4, 15.6, one carbon missing in the aromatic region. IR (KBr)  $\nu$  3445, 2953, 1616, 1558, 1389, 760  $\text{cm}^{-1}$ . HRMS (ESI) calcd for  $\text{C}_{48}\text{H}_{48}\text{N}_3\text{O}$   $[\text{M}+\text{H}]^+$  682.3792, found 682.3786.

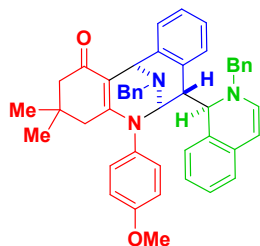

13-benzyl-7-(2-benzyl-1,2-dihydroisoquinolin-1-yl)-5-(4-methoxyphenyl)-3,3-dimethyl-3,4,5,6,7,12-hexahydro-6,12-epiminodibenzo[*b,e*]azocin-1(2*H*)-one (**10c**)

White solid obtained by filtration of the precipitate; 99.8 mg, 97% yield; dr > 20:1; reaction time = 5 min; mp 183.6-184.2 °C; <sup>1</sup>H NMR (400 MHz, CDCl<sub>3</sub>), δ 7.51 (d, *J* = 8.0 Hz, 1H), 7.24-7.13 (m, 11H), 6.92-6.86 (m, 3H), 6.68 (dd, *J*<sub>1</sub> = *J*<sub>2</sub> = 8.0 Hz, 4H), 6.50 (t, *J* = 8.0 Hz, 2H), 6.21 (d, *J* = 8.0 Hz, 1H), 5.28 (d, *J* = 8.0 Hz, 1H), 5.25 (s, 1H), 5.20 (d, *J* = 8.0 Hz, 1H), 4.59 (s, 1H), 4.28 (d, *J* = 8.0 Hz, 1H), 3.81 (d, *J* = 12.0 Hz, 1H), 3.73 (s, 3H), 3.70 (d, *J* = 16.0 Hz, 1H), 3.55 (d, *J* = 12.0 Hz, 1H), 3.33 (d, *J* = 16.0 Hz, 1H), 2.93 (d, *J* = 8.0 Hz, 1H), 2.14 (s, 2H), 2.07 (d, *J* = 16.0 Hz, 1H), 1.77 (d, *J* = 16.0 Hz, 1H), 1.03 (s, 3H), 0.80 (s, 3H); <sup>13</sup>C NMR (100 MHz, CDCl<sub>3</sub>) δ 192.0, 158.0, 154.7, 141.0, 138.3, 137.8, 136.7, 133.5, 132.5, 131.2, 129.7, 129.4, 128.5, 128.3, 127.5, 127.3, 127.1, 126.8, 126.7, 126.5, 125.9, 125.3 (2C), 123.5, 122.3, 105.7, 96.5, 74.8, 61.5, 58.1, 57.2, 55.4, 52.4, 49.8, 45.6, 40.9, 33.0, 29.5, 27.5, one carbon missing in the aromatic region. IR (KBr) ν 3442, 2951, 1611, 1563, 1504, 1247, 756 cm<sup>-1</sup>. HRMS (ESI) calcd for C<sub>47</sub>H<sub>45</sub>N<sub>3</sub>NaO<sub>2</sub> [M+Na]<sup>+</sup> 706.3404, found 706.3410.

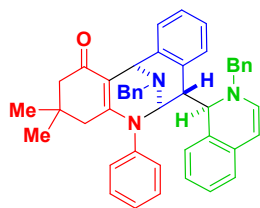

13-benzyl-7-(2-benzyl-1,2-dihydroisoquinolin-1-yl)-3,3-dimethyl-5-phenyl-3,4,5,6,7,12-hexahydro-6,12-epiminodibenzo[*b,e*]azocin-1(2*H*)-one (**10d**)

White solid obtained by column chromatography (petroleum ether/ethyl acetate = 4:1); 94.7 mg, 97% yield; dr > 20:1; reaction time = 5 min; mp 166.8-168.1 °C; <sup>1</sup>H NMR (400 MHz, CDCl<sub>3</sub>), δ 7.50 (d, *J* = 4.0 Hz, 1H), 7.24-7.13 (m, 14H), 6.92-6.86 (m, 3H), 6.68 (d, *J* = 8.0 Hz, 3H), 6.51 (t, *J* = 8.0 Hz, 1H), 6.19 (d, *J* = 8.0 Hz, 1H), 5.24 (q, *J* = 8.0 Hz, 3H), 4.71 (s, 1H), 4.30 (d, *J* = 8.0 Hz, 1H), 3.82 (d, *J* = 16.0 Hz, 1H), 3.67 (d, *J* = 16.0 Hz, 1H), 3.57 (d, *J* = 16.0 Hz, 1H), 3.31 (d, *J* = 16.0 Hz, 1H), 2.91 (d, *J* = 8.0 Hz, 1H), 2.15 (s, 2H), 1.90 (s, 1H), 1.76 (d, *J* = 16.0 Hz, 1H), 1.03 (s, 3H), 0.81 (s, 3H); <sup>13</sup>C NMR (100 MHz, CDCl<sub>3</sub>) δ 192.2, 154.2, 140.8 (2C), 138.2, 137.7, 136.6, 132.5, 131.1, 129.7, 129.6, 129.3, 128.4, 128.3, 127.5, 127.3, 127.0, 126.7, 126.6 (2C), 126.5, 125.9, 125.3 (2C), 123.5, 122.2, 106.0, 96.4, 74.8, 61.4, 58.0, 57.2, 52.2, 49.8, 45.6, 41.0, 33.1, 29.5, 27.3. IR (KBr) ν 3438, 2949, 1615, 1557, 1387, 759 cm<sup>-1</sup>. HRMS (ESI) calcd for C<sub>46</sub>H<sub>44</sub>N<sub>3</sub>O [M+H]<sup>+</sup> 654.3479, found 654.3488.

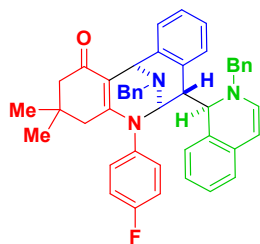

13-benzyl-7-(2-benzyl-1,2-dihydroisoquinolin-1-yl)-5-(4-fluorophenyl)-3,3-dimethyl-3,4,5,6,7,12-hexahydro-6,12-epiminodibenzo[*b,e*]azocin-1(2*H*)-one (**10e**)

White solid obtained by filtration of the precipitate; 95.3 mg, 95% yield; dr > 20:1; reaction time = 5 min; mp 167.5-168.3 °C; <sup>1</sup>H NMR (400 MHz, CDCl<sub>3</sub>), δ 7.51 (d, *J* = 8.0 Hz, 1H), 7.29-7.16 (m, 11H), 6.90 (dd, *J*<sub>1</sub> = 4.0 Hz, *J*<sub>2</sub> = 8.0 Hz, 3H), 6.81 (t, *J* = 8.0 Hz, 2H), 6.72-6.48 (m, 4H), 6.23 (d, *J* = 8.0 Hz, 1H), 5.30 (d, *J* = 8.0 Hz, 2H), 5.15 (d, *J* = 8.0 Hz, 1H), 4.55 (s, 1H), 4.23 (d, *J* = 8.0 Hz, 1H), 3.83 (d, *J* = 12.0 Hz, 1H), 3.73 (d, *J* = 16.0 Hz, 1H), 3.53 (d, *J* = 12.0 Hz, 1H), 3.30 (d, *J* = 16.0 Hz, 1H), 2.85 (d, *J* = 8.0 Hz, 1H), 2.29-2.05 (m, 3H), 1.73 (d, *J* = 16.0 Hz, 1H), 1.03 (s, 3H), 0.81 (s, 3H); <sup>13</sup>C NMR (100 MHz, CDCl<sub>3</sub>) δ 192.3, 160.8 (d, *J* = 246.0 Hz, 1C), 154.1, 140.7, 138.2, 137.7, 136.9, 136.8, 136.7, 132.5, 131.4, 129.8, 129.1, 128.6, 128.4, 127.7, 127.3, 127.1, 126.8, 126.7, 126.6, 125.9, 125.4, 125.3, 123.5, 122.2, 106.4, 96.6, 74.7, 61.3, 58.4, 57.3, 52.6, 49.8, 45.2, 41.0, 33.1, 29.5, 27.5. IR (KBr) ν 3440, 2953, 1611, 1566, 1502, 1220, 757 cm<sup>-1</sup>. HRMS (ESI) calcd for C<sub>46</sub>H<sub>42</sub>FN<sub>3</sub>NaO [M+Na]<sup>+</sup> 694.3204, found 694.3190.

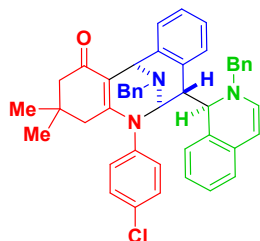

13-benzyl-7-(2-benzyl-1,2-dihydroisoquinolin-1-yl)-5-(4-chlorophenyl)-3,3-dimethyl-3,4,5,6,7,12-hexahydro-6,12-epiminodibenzo[*b,e*]azocin-1(2*H*)-one (**10f**)

White solid obtained by filtration of the precipitate; 98.3 mg, 95% yield; dr > 20:1; reaction time = 5 min; mp 168.3-169.1 °C; <sup>1</sup>H NMR (400 MHz, CDCl<sub>3</sub>), δ 7.50 (d, *J* = 8.0 Hz, 1H), 7.25-7.17 (m, 11H), 7.08 (d, *J* = 8.0 Hz, 2H), 6.92 (t, *J* = 8.0 Hz, 3H), 6.73 (d, *J* = 8.0 Hz, 1H), 6.53 (q, *J* = 8.0 Hz, 3H), 6.23 (d, *J* = 8.0 Hz, 1H), 5.29 (t, *J* = 8.0 Hz, 2H), 5.16 (d, *J* = 8.0 Hz, 1H), 4.60 (s, 1H), 4.23 (d, *J* = 8.0 Hz, 1H), 3.82 (d, *J* = 12.0 Hz, 1H), 3.72 (d, *J* = 12.0 Hz, 1H), 3.52 (d, *J* = 12.0 Hz, 1H), 3.31 (d, *J* = 16.0 Hz, 1H), 2.83 (d, *J* = 8.0 Hz, 1H), 2.28-2.09 (m, 3H), 1.73 (d, *J* = 16.0 Hz, 1H), 1.03 (s, 3H), 0.82 (s, 3H); <sup>13</sup>C NMR (100 MHz, CDCl<sub>3</sub>) δ 192.4, 153.7, 140.6, 139.4, 138.2,

137.7, 136.6, 132.6, 132.2, 131.4, 129.8, 129.3, 129.1, 128.6, 128.3, 127.7, 127.3, 127.1, 126.8, 126.6 (2C), 125.9, 125.4, 125.3, 123.5, 122.4, 106.9, 96.6, 74.6, 61.4, 58.4, 57.2, 52.5, 49.8, 45.2, 41.1, 33.2, 29.6, 27.4. IR (KBr)  $\nu$  3440, 2929, 1614, 1564, 1387, 762  $\text{cm}^{-1}$ . HRMS (ESI) calcd for  $\text{C}_{46}\text{H}_{43}\text{ClN}_3\text{O}$   $[\text{M}+\text{H}]^+$  688.3089, found 688.3077.

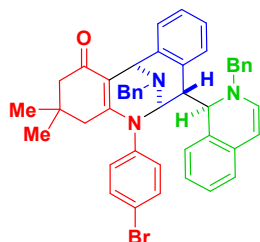

13-benzyl-7-(2-benzyl-1,2-dihydroisoquinolin-1-yl)-5-(4-bromophenyl)-3,3-dimethyl-3,4,5,6,7,12-hexahydro-6,12-epiminodibenzo[*b,e*]azocin-1(2*H*)-one (**10g**)

White solid obtained by filtration of the precipitate; 97.5 mg, 89% yield; dr > 20:1; reaction time = 5 min; mp 151.2-151.9 °C;  $^1\text{H}$  NMR (400 MHz,  $\text{CDCl}_3$ ),  $\delta$  7.42 (d,  $J$  = 8.0 Hz, 1H), 7.23-7.07 (m, 13H), 6.87-6.81 (m, 3H), 6.66 (d,  $J$  = 8.0 Hz, 1H), 6.45 (t,  $J$  = 8.0 Hz, 3H), 6.15 (d,  $J$  = 8.0 Hz, 1H), 5.22 (t,  $J$  = 8.0 Hz, 2H), 5.08 (d,  $J$  = 8.0 Hz, 1H), 4.53 (s, 1H), 4.15 (d,  $J$  = 8.0 Hz, 1H), 3.75 (d,  $J$  = 12.0 Hz, 1H), 3.65 (d,  $J$  = 16.0 Hz, 1H), 3.45 (d,  $J$  = 12.0 Hz, 1H), 3.24 (d,  $J$  = 16.0 Hz, 1H), 2.74 (d,  $J$  = 8.0 Hz, 1H), 2.05 (d,  $J$  = 8.0 Hz, 3H), 1.66 (d,  $J$  = 16.0 Hz, 1H), 0.95 (s, 3H), 0.75 (s, 3H);  $^{13}\text{C}$  NMR (100 MHz,  $\text{CDCl}_3$ )  $\delta$  192.5, 153.6, 140.6, 140.0, 138.2, 137.7, 136.6, 132.6, 132.3, 131.4, 129.8, 129.1, 128.6, 128.4, 127.7, 127.3, 127.1, 126.8, 126.6, 125.9, 125.4, 125.3, 123.5, 122.4, 120.1, 106.9, 96.7, 74.6, 61.4, 58.4, 57.3, 52.5, 49.8, 45.2, 41.1, 33.3, 29.7, 27.4, one carbon missing in the aromatic region. IR (KBr)  $\nu$  3426, 2950, 1615, 1563, 1387, 762  $\text{cm}^{-1}$ . HRMS (ESI) calcd for  $\text{C}_{46}\text{H}_{43}\text{BrN}_3\text{O}$   $[\text{M}+\text{H}]^+$  732.2584, found 732.2587.

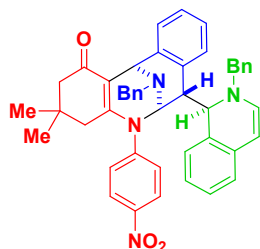

13-benzyl-7-(2-benzyl-1,2-dihydroisoquinolin-1-yl)-3,3-dimethyl-5-(4-nitrophenyl)-3,4,5,6,7,12-hexahydro-6,12-epiminodibenzo[*b,e*]azocin-1(2*H*)-one (**10h**)

Yellow solid obtained by filtration of the precipitate; 99.7 mg, 95% yield; dr > 20:1; reaction time = 5 min; mp 158.7-159.4 °C;  $^1\text{H}$  NMR (400 MHz,  $\text{CDCl}_3$ ),  $\delta$  7.88 (d,  $J$  = 8.0 Hz, 2H), 7.50 (d,  $J$  =

8.0 Hz, 1H), 7.34-7.20 (m, 11H), 6.96 (t,  $J = 8.0$  Hz, 1H), 6.86 (s, 2H), 6.70 (d,  $J = 8.0$  Hz, 1H), 6.61 (q,  $J = 8.0$  Hz, 3H), 6.26 (d,  $J = 8.0$  Hz, 1H), 5.37 (s, 1H), 5.28 (d,  $J = 4.0$  Hz, 1H), 5.11 (d,  $J = 8.0$  Hz, 1H), 4.77 (s, 1H), 4.17 (d,  $J = 8.0$  Hz, 1H), 3.86 (d,  $J = 12.0$  Hz, 1H), 3.76 (d,  $J = 12.0$  Hz, 1H), 3.54 (d,  $J = 12.0$  Hz, 1H), 3.25 (d,  $J = 16.0$  Hz, 1H), 2.67 (d,  $J = 8.0$  Hz, 1H), 2.30 (d,  $J = 16.0$  Hz, 1H), 2.21 (s, 2H), 1.75 (d,  $J = 16.0$  Hz, 1H), 1.05 (s, 3H), 0.88 (s, 3H);  $^{13}\text{C}$  NMR (100 MHz,  $\text{CDCl}_3$ )  $\delta$  193.1, 152.3, 147.0, 144.6, 139.9, 138.0, 137.4, 136.5, 132.7, 131.6, 129.8, 128.7, 128.6, 128.3, 127.9, 127.2, 127.1, 127.0, 126.8, 126.4, 125.7, 125.6, 125.3, 124.4, 123.5, 122.4, 109.5, 96.7, 74.2, 61.1, 58.6, 57.3, 52.9, 49.9, 44.9, 41.6, 33.7, 29.8, 27.0. IR (KBr)  $\nu$  3421, 2930, 1618, 1556, 1340, 760  $\text{cm}^{-1}$ . HRMS (ESI) calcd for  $\text{C}_{46}\text{H}_{42}\text{N}_4\text{NaO}_3$   $[\text{M}+\text{Na}]^+$  721.3149, found 721.3165.

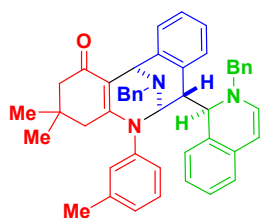

13-benzyl-7-(2-benzyl-1,2-dihydroisoquinolin-1-yl)-3,3-dimethyl-5-(*m*-tolyl)-3,4,5,6,7,12-hexahydro-6,12-epiminodibenzo[*b,e*]azocin-1(2*H*)-one (**10i**)

White solid obtained by filtration of the precipitate; 90.3 mg, 90% yield; dr > 20:1; reaction time = 5 min; mp 174.3-175.6 °C;  $^1\text{H}$  NMR (400 MHz,  $\text{CDCl}_3$ )  $\delta$  7.51 (d,  $J = 8.0$  Hz, 1H), 7.21-7.12 (m, 12H), 7.01 (t,  $J = 8.0$  Hz, 1H), 6.89 (t,  $J = 8.0$  Hz, 4H), 6.70 (d,  $J = 8.0$  Hz, 1H), 6.42 (q,  $J = 8.0$  Hz, 3H), 6.19 (d,  $J = 12.0$  Hz, 1H), 5.24 (q,  $J = 8.0$  Hz, 3H), 4.68 (s, 1H), 4.29 (d,  $J = 8.0$  Hz, 1H), 3.83 (d,  $J = 16.0$  Hz, 1H), 3.68 (d,  $J = 24.0$  Hz, 1H), 3.56 (d,  $J = 16.0$  Hz, 1H), 3.28 (d,  $J = 20.0$  Hz, 1H), 2.90 (dd,  $J_1 = J_2 = 8.0$  Hz, 1H), 2.20 (s, 3H), 2.15 (s, 2H), 1.77 (d,  $J = 12.0$  Hz, 1H), 1.04 (s, 3H), 0.83 (s, 3H);  $^{13}\text{C}$  NMR (100 MHz,  $\text{CDCl}_3$ )  $\delta$  192.2, 154.3, 140.9, 140.7, 139.5, 138.3, 137.8, 136.7, 132.6, 131.3, 129.8, 129.3, 128.8, 128.5, 128.4, 127.6, 127.5, 127.3, 127.1, 126.8, 126.7, 126.5, 126.0, 125.5, 125.3, 123.5, 123.2, 122.3, 106.1, 96.4, 74.6, 61.4, 58.2, 57.2, 52.4, 49.9, 45.4, 41.1, 33.2, 29.7, 27.3, 21.2. IR (KBr)  $\nu$  3438, 2952, 1609, 1562, 1396, 753  $\text{cm}^{-1}$ . HRMS (ESI) calcd for  $\text{C}_{47}\text{H}_{46}\text{N}_3\text{O}$   $[\text{M}+\text{H}]^+$  668.3635, found 668.3635.

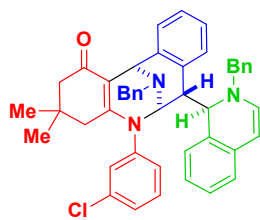

13-benzyl-7-(2-benzyl-1,2-dihydroisoquinolin-1-yl)-5-(3-chlorophenyl)-3,3-dimethyl-3,4,5,6,7,12-hexahydro-6,12-epiminodibenzo[*b,e*]azocin-1(2*H*)-one (**10j**)

White solid obtained by filtration of the precipitate; 100.2 mg, 97% yield; dr > 20:1; reaction time = 5 min; mp 188.2-189.1 °C; <sup>1</sup>H NMR (400 MHz, CDCl<sub>3</sub>), δ 7.50 (d, *J* = 8.0 Hz, 1H), 7.29-7.13 (m, 11H), 7.04 (q, *J* = 12.0 Hz, 2H), 6.91 (d, *J* = 8.0 Hz, 3H), 6.72 (d, *J* = 8.0 Hz, 2H), 6.57 (s, 2H), 6.23 (d, *J* = 8.0 Hz, 1H), 5.28 (t, *J* = 8.0 Hz, 2H), 5.20 (d, *J* = 12.0 Hz, 1H), 4.67 (s, 1H), 4.25 (d, *J* = 8.0 Hz, 1H), 3.82 (d, *J* = 16.0 Hz, 1H), 3.72 (d, *J* = 20.0 Hz, 1H), 3.53 (d, *J* = 16.0 Hz, 1H), 3.31 (d, *J* = 20.0 Hz, 1H), 2.83 (d, *J* = 12.0 Hz, 1H), 2.16 (d, *J* = 12.0 Hz, 3H), 1.73 (d, *J* = 12.0 Hz, 1H), 1.04 (s, 3H), 0.85 (s, 3H); <sup>13</sup>C NMR (100 MHz, CDCl<sub>3</sub>) δ 192.6, 153.4, 142.1, 140.5 (2C), 138.2, 137.5, 136.6, 132.4, 131.3, 129.7, 129.0, 128.6, 128.3, 127.7, 127.3, 127.2, 127.1, 126.9, 126.8, 126.7, 126.6, 126.5, 125.9, 125.4, 125.3, 123.5, 122.3, 107.0, 96.6, 74.7, 61.3, 58.2, 57.2, 52.3, 49.8, 45.6, 41.1, 33.3, 29.8, 27.2. IR (KBr) ν 3427, 2952, 1611, 1564, 1394, 759 cm<sup>-1</sup>. HRMS (ESI) calcd for C<sub>46</sub>H<sub>42</sub>ClN<sub>3</sub>NaO [M+Na]<sup>+</sup> 710.2909, found 710.2905.

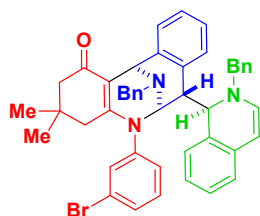

13-benzyl-7-(2-benzyl-1,2-dihydroisoquinolin-1-yl)-5-(3-bromophenyl)-3,3-dimethyl-3,4,5,6,7,12-hexahydro-6,12-epiminodibenzo[*b,e*]azocin-1(2*H*)-one (**10k**)

White solid obtained by filtration of the precipitate; 101.8 mg, 93% yield; dr > 20:1; reaction time = 5 min; mp 168.7-169.9 °C; <sup>1</sup>H NMR (400 MHz, CDCl<sub>3</sub>), δ 7.49 (d, *J* = 12.0 Hz, 1H), 7.22-7.15 (m, 12H), 7.01-6.82 (m, 5H), 6.73 (d, *J* = 12.0 Hz, 1H), 6.58 (d, *J* = 16.0 Hz, 2H), 6.23 (d, *J* = 8.0 Hz, 1H), 5.30 (d, *J* = 8.0 Hz, 1H), 5.25 (s, 1H), 5.21 (d, *J* = 12.0 Hz, 1H), 4.67 (s, 1H), 4.26 (s, 1H), 3.82 (d, *J* = 16.0 Hz, 1H), 3.72 (d, *J* = 20.0 Hz, 1H), 3.53 (d, *J* = 16.0 Hz, 1H), 3.30 (d, *J* = 20.0 Hz, 1H), 2.84 (s, 1H), 2.16 (d, *J* = 12.0 Hz, 3H), 1.71 (t, *J* = 20.0 Hz, 1H), 1.04 (s, 3H), 0.85 (s, 3H); <sup>13</sup>C NMR (100 MHz, CDCl<sub>3</sub>) δ 192.5, 153.3, 142.3, 142.2, 140.5, 138.1, 137.5, 136.6,

131.3, 130.1, 130.0, 129.7, 129.6, 129.1, 128.5, 128.3, 127.7, 127.3, 127.1, 126.8, 126.5, 125.9, 125.4, 125.3, 123.6, 123.5, 122.3 (2C), 106.8, 96.6, 74.8, 61.3, 58.2, 57.2, 52.2, 49.8, 45.7, 41.1, 33.3, 29.8, 27.2. IR (KBr)  $\nu$  3444, 2952, 1612, 1562, 1395, 759  $\text{cm}^{-1}$ . HRMS (ESI) calcd for  $\text{C}_{46}\text{H}_{42}\text{BrN}_3\text{NaO}$   $[\text{M}+\text{Na}]^+$  754.2403, found 754.2398.

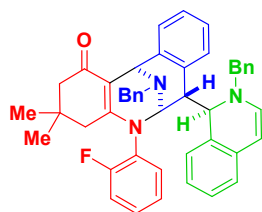

13-benzyl-7-(2-benzyl-1,2-dihydroisoquinolin-1-yl)-5-(2-fluorophenyl)-3,3-dimethyl-3,4,5,6,7,12-hexahydro-6,12-epiminodibenzo[*b,e*]azocin-1(2*H*)-one (**10l**)

White solid obtained by column chromatography (petroleum ether/ethyl acetate = 4:1); 91.0 mg, 90% yield; dr = 1.6:1; reaction time = 5 min; mp 140.3-141.2  $^{\circ}\text{C}$ ;  $^1\text{H}$  NMR (400 MHz,  $\text{CDCl}_3$ ),  $\delta$  7.49 (dd,  $J_1 = J_2 = 8.0$  Hz, 1H), 7.25-7.14 (m, 12H), 6.96-6.84 (m, 5H), 6.68 (t,  $J = 8.0$  Hz, 2H), 6.49 (t,  $J = 8.0$  Hz, 1H), 6.24 (d,  $J = 8.0$  Hz, 1H), 5.33-5.20 (m, 3H), 4.52 (s, 1H), 4.27 (d,  $J = 8.0$  Hz, 1H), 3.86-3.54 (m, 3H), 3.34 (t,  $J = 16.0$  Hz, 1H), 2.95 (d,  $J = 8.0$  Hz, 1H), 2.21-1.96 (m, 3H), 1.77 (dd,  $J_1 = J_2 = 16.0$  Hz, 1H), 1.04 (s, 3H), 0.80 (s, 3H);  $^{13}\text{C}$  NMR (100 MHz,  $\text{CDCl}_3$ )  $\delta$  192.5, 159.1, 156.6, 154.6, 140.8, 138.4, 138.1, 136.7, 132.4, 131.3 (d,  $J = 36.0$  Hz, 1C), 129.9, 129.4, 129.3, 128.6, 128.5, 128.3, 127.6, 127.3, 127.3, 127.1, 126.8, 126.6, 126.5, 125.9, 125.4, 125.3, 125.1, 122.8 (d,  $J = 144.0$  Hz, 1C), 116.7 (d,  $J = 20.0$  Hz, 1C), 106.8, 96.6, 73.9, 61.4, 58.4, 56.9, 52.5, 49.8, 45.9, 40.6, 32.9, 29.2. IR (KBr)  $\nu$  3430, 1620, 1562, 1390, 757  $\text{cm}^{-1}$ . HRMS (ESI) calcd for  $\text{C}_{46}\text{H}_{43}\text{FN}_3\text{O}$   $[\text{M}+\text{H}]^+$  672.3385, found 672.3366.

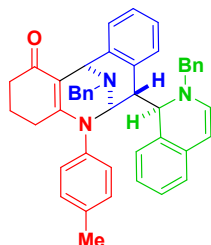

13-benzyl-7-(2-benzyl-1,2-dihydroisoquinolin-1-yl)-5-(*p*-tolyl)-3,4,5,6,7,12-hexahydro-6,12-epiminodibenzo[*b,e*]azocin-1(2*H*)-one (**10m**)

White solid obtained by filtration of the precipitate; 85.7 mg, 89% yield; dr > 20:1; reaction time = 5 min; mp 181.7-182.9  $^{\circ}\text{C}$ ;  $^1\text{H}$  NMR (400 MHz,  $\text{CDCl}_3$ ),  $\delta$  7.53 (d,  $J = 8.0$  Hz, 1H), 7.25-7.12 (m, 11H), 6.94-6.5 (m, 5H), 6.69-6.47 (m, 4H), 6.19 (d,  $J = 8.0$  Hz, 1H), 5.27 (d,  $J = 12.0$  Hz, 2H),



5.18 (d,  $J = 8.0$  Hz, 1H), 4.63 (s, 1H), 4.28 (d,  $J = 8.0$  Hz, 1H), 3.79 (d,  $J = 12.0$  Hz, 1H), 3.67 (d,  $J = 16.0$  Hz, 1H), 3.53 (d,  $J = 12.0$  Hz, 1H), 3.32 (d,  $J = 16.0$  Hz, 1H), 2.93 (d,  $J = 4.0$  Hz, 1H), 2.34-2.15 (m, 6H), 1.97 (d,  $J = 16.0$  Hz, 1H), 1.83-1.74 (m, 2H);  $^{13}\text{C}$  NMR (100 MHz,  $\text{CDCl}_3$ )  $\delta$  192.5, 156.3, 141.0, 138.3, 138.2, 137.9, 136.7, 136.6, 132.5, 131.2, 130.8, 129.7, 129.5, 128.4, 128.3, 128.1, 127.4, 127.3, 127.0, 126.8, 126.6, 126.4, 126.1, 125.3, 125.3, 123.5, 122.2, 106.6, 96.4, 74.6, 61.4, 58.0, 57.0, 52.3, 45.9, 36.3, 27.3, 22.4, 20.8. IR (KBr)  $\nu$  3436, 2932, 1612, 1558, 1446, 751  $\text{cm}^{-1}$ . HRMS (ESI) calcd for  $\text{C}_{45}\text{H}_{42}\text{N}_3\text{O}$   $[\text{M}+\text{H}]^+$  640.3322, found 640.3323.

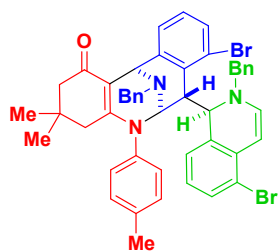

13-benzyl-7-(2-benzyl-5-bromo-1,2-dihydroisoquinolin-1-yl)-8-bromo-3,3-dimethyl-5-(*p*-tolyl)-3,4,5,6,7,12-hexahydro-6,12-epiminodibenzo[*b,e*]azocin-1(2*H*)-one (**10n**)

White solid obtained by column chromatography (petroleum ether/ethyl acetate = 4:1); 109.3 mg, 88% yield; dr > 20:1; reaction time = 5 min; mp 175.3-176.4 °C;  $^1\text{H}$  NMR (400 MHz,  $\text{CDCl}_3$ ),  $\delta$  7.37 (dd,  $J_1 = J_2 = 8.0$  Hz, 3H), 7.25-7.20 (m, 9H), 7.03 (d,  $J = 4.0$  Hz, 2H), 6.97 (t,  $J = 8.0$  Hz, 2H), 6.83 (t,  $J = 4.0$  Hz, 2H), 6.40 (t,  $J = 8.0$  Hz, 1H), 6.13 (d,  $J = 4.0$  Hz, 1H), 5.51 (dd,  $J_1 = J_2 = 4.0$  Hz, 3H), 5.43 (d,  $J = 4.0$  Hz, 1H), 4.62 (s, 1H), 4.01 (d,  $J = 16.0$  Hz, 1H), 3.79 (d,  $J = 12.0$  Hz, 1H), 3.71 (d,  $J = 4.0$  Hz, 1H), 3.59 (d,  $J = 4.0$  Hz, 1H), 3.56 (s, 1H), 2.50 (s, 3H), 2.14 (d,  $J = 16.0$  Hz, 1H), 2.04 (s, 2H), 1.77 (d,  $J = 20.0$  Hz, 1H), 1.03 (s, 3H), 0.83 (s, 3H);  $^{13}\text{C}$  NMR (100 MHz,  $\text{CDCl}_3$ )  $\delta$  191.8, 154.1, 144.3, 139.3, 138.4, 137.7, 137.6, 136.3, 133.0, 131.0, 131.0, 130.4, 130.2, 129.4, 129.1, 128.7, 128.7, 128.6, 128.0, 127.5, 127.4, 127.1, 126.3, 125.7, 124.8, 124.0, 118.9, 104.3, 95.1, 78.0, 60.5, 56.7, 55.1, 49.8, 48.7, 48.2, 40.8, 32.9, 27.5, 21.2. IR (KBr)  $\nu$  3440, 2925, 1630, 794  $\text{cm}^{-1}$ . HRMS (ESI) calcd for  $\text{C}_{47}\text{H}_{44}\text{Br}_2\text{N}_3\text{O}$   $[\text{M}+\text{H}]^+$  824.1846, found 824.1834.

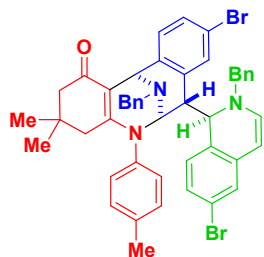

13-benzyl-7-(2-benzyl-6-bromo-1,2-dihydroisoquinolin-1-yl)-9-bromo-3,3-dimethyl-5-(*p*-tolyl)-

3,4,5,6,7,12-hexahydro-6,12-epiminodibenzo[*b,e*]azocin-1(2*H*)-one (**10o**)

White solid obtained by column chromatography (petroleum ether/ethyl acetate = 4:1); 101.2 mg, 82% yield; dr > 20:1; reaction time = 5 min; mp 194.9-196.0 °C; <sup>1</sup>H NMR (400 MHz, CDCl<sub>3</sub>) δ 7.44 (d, *J* = 8.0 Hz, 1H), 7.34-7.23 (m, 8H), 7.19 (d, *J* = 8.0 Hz, 2H), 6.98 (s, 2H), 6.90 (d, *J* = 4.0 Hz, 2H), 6.78 (d, *J* = 4.0 Hz, 1H), 6.56 (dd, *J*<sub>1</sub> = *J*<sub>2</sub> = 4.0 Hz, 2H), 6.49 (s, 1H), 6.30 (d, *J* = 8.0 Hz, 1H), 5.24 (t, *J* = 8.0 Hz, 2H), 4.78 (d, *J* = 8.0 Hz, 1H), 4.43 (s, 1H), 4.07 (d, *J* = 8.0 Hz, 1H), 3.82 (dd, *J*<sub>1</sub> = 8.0 Hz, *J*<sub>2</sub> = 12.0 Hz, 2H), 3.51 (d, *J* = 12.0 Hz, 1H), 3.35 (d, *J* = 16.0 Hz, 1H), 2.76 (d, *J* = 8.0 Hz, 1H), 2.32 (s, 3H), 2.13 (d, *J* = 16.0 Hz, 3H), 1.80 (d, *J* = 20.0 Hz, 1H), 1.02 (s, 3H), 0.83 (s, 3H); <sup>13</sup>C NMR (100 MHz, CDCl<sub>3</sub>) δ 192.2, 154.6, 140.1, 137.7, 137.7, 137.6, 137.4, 137.2, 134.7, 134.1, 131.6, 130.3, 129.9, 129.8, 128.7, 128.5, 127.8, 127.7, 127.4, 127.3, 126.8, 126.1, 124.9, 124.6, 123.0, 120.7, 119.0, 105.2, 95.9, 73.4, 61.0, 58.6, 57.1, 52.6, 49.8, 44.3, 40.9, 33.1, 29.6, 20.9. IR (KBr) ν 3437, 2924, 1614, 1566, 1393, 723 cm<sup>-1</sup>. HRMS (ESI) calcd for C<sub>47</sub>H<sub>44</sub>Br<sub>2</sub>N<sub>3</sub>O [M+H]<sup>+</sup> 824.1846, found 824.1854.

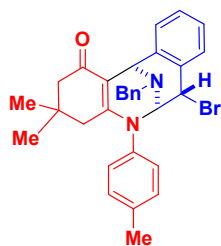

13-benzyl-7-bromo-3,3-dimethyl-5-(*p*-tolyl)-3,4,5,6,7,12-hexahydro-6,12-epiminodibenzo[*b,e*]azocin-1(2*H*)-one (**10p**)

White solid obtained by column chromatography (petroleum ether/ethyl acetate = 10:1); 43.0 mg, 54% yield; dr > 20:1; reaction time = 5 min; mp 171.0-172.1 °C; <sup>1</sup>H NMR (400 MHz, CDCl<sub>3</sub>) δ 7.54 (d, *J* = 8.0 Hz, 2H), 7.48 (d, *J* = 8.0 Hz, 1H), 7.37 (q, *J* = 8.0 Hz, 3H), 7.31 (d, *J* = 8.0 Hz, 1H), 7.22-7.15 (m, 4H), 6.86 (s, 2H), 5.27 (d, *J* = 8.0 Hz, 2H), 4.79 (s, 1H), 3.99 (d, *J* = 16.0 Hz, 1H), 3.71 (t, *J* = 4.0 Hz, 1H), 2.38 (s, 3H), 2.17 (q, *J* = 16.0 Hz, 2H), 2.06 (d, *J* = 16.0 Hz, 1H), 1.79 (d, *J* = 16.0 Hz, 1H), 1.07 (s, 3H), 0.83 (s, 3H); <sup>13</sup>C NMR (100 MHz, CDCl<sub>3</sub>) δ 192.7, 153.5, 138.6, 138.4, 138.2, 136.7, 130.8, 130.0, 129.4, 129.0, 128.9, 128.4, 127.7, 126.6, 126.5, 105.8, 79.6, 57.0, 51.3, 49.8, 47.1, 40.7, 33.0, 29.5, 27.5, 21.1. IR (KBr) ν 3431, 2956, 1567, 1391, 747 cm<sup>-1</sup>. HRMS (ESI) calcd for C<sub>31</sub>H<sub>32</sub>BrN<sub>2</sub>O [M+H]<sup>+</sup> 527.1693, found 527.1689.

## 8. Experimental data for the derivations of 3g

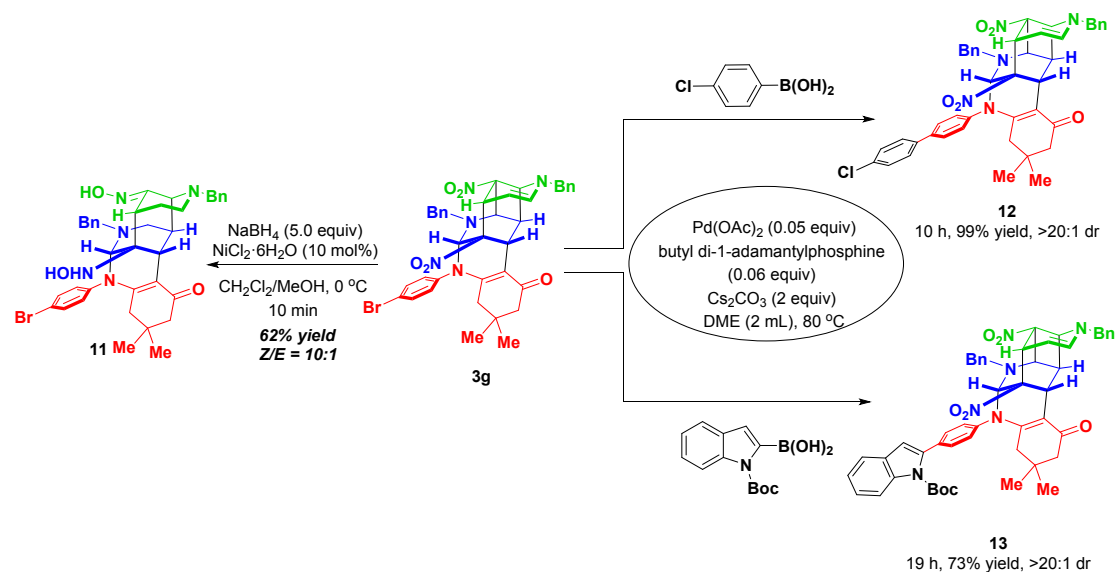

**General procedure for the formation of 11:** A solution of **3g** (144.5 mg, 0.20 mmol) and  $\text{NiCl}_2 \cdot 6\text{H}_2\text{O}$  (4.8 mg, 0.02 mmol) in 1.0 mL MeOH and 1.0 mL DCM was cooled to  $0\text{ }^\circ\text{C}$ , and then  $\text{NaBH}_4$  (37.8 mg, 1.0 mmol) was added successively. The reaction mixture was stirred at  $0\text{ }^\circ\text{C}$  for 10 min until the complete consumption of **3g** as monitored by thin layer chromatography. Then, saturated aq.  $\text{NH}_4\text{Cl}$  solution was added. The mixture was extracted with  $\text{CH}_2\text{Cl}_2$ . The combined organic phase was dried over  $\text{MgSO}_4$ , filtered, concentrated and purified with silica gel column chromatography to obtain **11** in 62% yield with 10:1 Z/E.

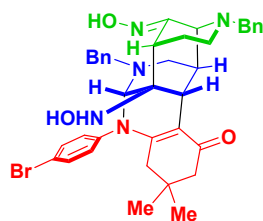

3,13-dibenzyl-8-(4-bromophenyl)-6a-(hydroxyamino)-15-(hydroxyimino)-10,10-dimethyl-2,3,4,5,6,6a,7,8,9,10,11,12b-dodecahydro-7,1-(epiminomethano)-2,6-methanoazocino[5,4-*c*]quinolin-12(1*H*)-one (**11**)

White solid obtained by column chromatography (petroleum ether/ethyl acetate = 1:1); 86.3 mg, 62% yield;  $Z/E = 10:1$ ; reaction time = 10 min; mp  $224.7\text{--}225.9\text{ }^\circ\text{C}$ ;  $^1\text{H}$  NMR (400 MHz,  $\text{DMSO-}d_6$ ),  $\delta$  10.09 (s, 1H), 7.57–7.19 (m, 10H), 7.08–6.86 (m, 5H), 5.02 (s, 1H), 4.64 (s, 1H), 3.90 (s, 1H), 3.78–3.70 (m, 2H), 3.62 (d,  $J = 12.0$  Hz, 1H), 3.48 (s, 2H), 3.07 (s, 1H), 2.69–2.51 (m, 3H), 2.32–2.14 (m, 4H), 2.05–1.88 (m, 3H), 1.71 (s, 1H), 1.00 (s, 3H), 0.86 (s, 3H);  $^{13}\text{C}$  NMR (100 MHz,  $\text{DMSO-}d_6$ )  $\delta$  192.4, 157.2, 157.1, 144.7, 139.7, 136.5, 128.9, 128.0, 127.5, 126.8, 126.5, 119.1,

104.8, 78.3, 63.6, 61.5, 59.8, 58.7, 57.5, 49.7, 47.5, 45.8, 40.9, 32.0, 30.8, 29.3, 26.8, 26.7, 24.5, 20.8, 14.1. IR (KBr)  $\nu$  3280, 2953, 1554, 1409, 1245, 739  $\text{cm}^{-1}$ . HRMS (ESI) calcd for  $\text{C}_{38}\text{H}_{43}\text{BrN}_5\text{O}_3$   $[\text{M}+\text{H}]^+$  696.2544, found 696.2549.

**General procedure for the formation of 12:** Under nitrogen atmosphere, compound **3g** (72.3 mg, 0.10 mmol), 4-chlorophenyl boronic acid (23.5 mg, 0.15 mmol, 1.5 equiv),  $\text{Cs}_2\text{CO}_3$  (2.0 equiv),  $\text{Pd}(\text{OAc})_2$  (0.05 equiv) and butyl di-1-adamantylphosphine (0.06 equiv) were successively added to a 15 mL dried tube, followed by adding 2.0 mL DME. The resulting mixture was stirred at 80 °C for 10 h, and then the reaction mixture was directly subjected to silica gel column chromatography (petroleum ether/ ethyl acetate as eluent) to afford the corresponding product **12** as a yellow solid in 99% yield.

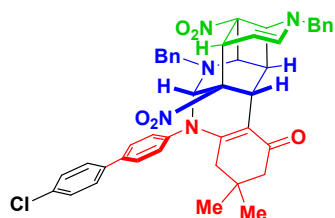

7,11-dibenzyl-5-(4'-chloro-[1,1'-biphenyl]-4-yl)-3,3-dimethyl-7b,13-dinitro-3,4,5,6,7,7a,7b,8,11,11a,11b,12-dodecahydro-6,8,12-(epimethanetriyl)benzo[*d*]pyrido[3',2':3,4]cyclobuta[1,2-*g*][1,3]diazocin-1(2*H*)-one (**12**)

Yellow solid obtained by column chromatography (petroleum ether/ethyl acetate = 5:1); 82.7 mg, 99% yield; dr > 20:1; reaction time = 10 h; mp 179.4-180.5 °C;  $^1\text{H}$  NMR (400 MHz,  $\text{CDCl}_3$ ),  $\delta$  7.64 (s, 1H), 7.55 (d,  $J$  = 8.0 Hz, 2H), 7.49 (d,  $J$  = 8.0 Hz, 2H), 7.42-7.39 (m, 6H), 7.29-7.25 (m, 3H), 7.13 (q,  $J$  = 4.0 Hz, 4H), 6.46 (d,  $J$  = 8.0 Hz, 1H), 5.33 (d,  $J$  = 4.0 Hz, 1H), 4.38 (q,  $J$  = 16.0 Hz, 2H), 4.25 (d,  $J$  = 12.0 Hz, 1H), 4.09 (t,  $J$  = 8.0 Hz, 1H), 3.98 (s, 1H), 3.88 (dd,  $J_1 = J_2 = 4.0$  Hz, 1H), 3.75 (dd,  $J_1 = J_2 = 4.0$  Hz, 1H), 3.29 (d,  $J$  = 8.0 Hz, 1H), 2.57 (t,  $J$  = 8.0 Hz, 1H), 2.33-2.22 (m, 3H), 1.98 (dd,  $J_1 = 4.0$  Hz,  $J_2 = 16.0$  Hz, 2H), 1.03 (s, 3H), 0.97 (s, 3H);  $^{13}\text{C}$  NMR (100 MHz,  $\text{CDCl}_3$ )  $\delta$  194.2, 153.2, 141.9, 139.7, 139.2, 137.9, 136.6, 134.0, 129.1, 129.0, 128.7 (2C), 128.2 (2C), 128.0, 127.9 (2C), 127.7, 127.4 (2C), 107.7, 87.9, 83.2, 82.4, 80.1, 59.0, 57.7, 51.5, 50.1, 45.7, 41.9, 39.2, 33.0, 26.2, 24.9. IR (KBr)  $\nu$  3436, 3033, 2953, 1635, 1585, 1542, 1390, 740  $\text{cm}^{-1}$ . HRMS (ESI) calcd for  $\text{C}_{44}\text{H}_{41}\text{ClN}_5\text{O}_5$   $[\text{M}+\text{H}]^+$  754.27917, found 754.2797.

**General procedure for the formation of 13:** Under nitrogen atmosphere, compound **3g** (72.3 mg, 0.10 mmol), 2-indolyl boronic acid (39.2 mg, 0.15 mmol, 1.5 equiv),  $\text{Cs}_2\text{CO}_3$  (2.0 equiv),

Pd(OAc)<sub>2</sub> (0.05 equiv) and butyl di-1-adamantylphosphine (0.06 equiv) were successively added to a 15 mL dried tube, followed by adding 2.0 mL DME. The resulting mixture was stirred at 80 °C for 19 h, and then the reaction mixture was directly subjected to silica gel column chromatography (petroleum ether/ ethyl acetate as eluent) to afford the corresponding product **13** as a yellow solid in 73% yield.

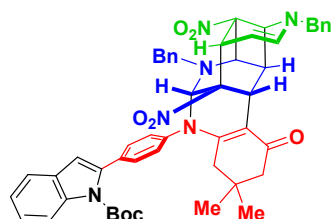

*tert*-butyl 2-(4-(-7,11-dibenzyl-3,3-dimethyl-7b,13-dinitro-1-oxo-2,3,4,6,7,7a,7b,8,11,11a,11b,12-dodecahydro-6,8,12-(epimethanetriyl)benzo[*d*]pyrido[3',2':3,4]cyclobuta[1,2-*g*][1,3]diazocin-5(1*H*)-yl)phenyl)-1*H*-indole-1-carboxylate (**13**)

Yellow solid obtained by column chromatography (petroleum ether/ethyl acetate = 7:1); 63.7 mg, 73% yield; dr > 20:1; reaction time = 19 h; mp 179.9-181.3 °C; <sup>1</sup>H NMR (400 MHz, CDCl<sub>3</sub>), δ 8.21 (d, *J* = 8.0 Hz, 1H), 7.54 (d, *J* = 8.0 Hz, 1H), 7.45-7.32 (m, 6H), 7.30-7.25 (m, 6H), 7.15-7.10 (m, 4H), 6.58 (s, 1H), 6.48 (d, *J* = 8.0 Hz, 1H), 5.33 (d, *J* = 4.0 Hz, 1H), 4.40 (q, *J* = 16.0 Hz, 2H), 4.26 (d, *J* = 12.0 Hz, 1H), 4.10 (t, *J* = 8.0 Hz, 1H), 3.97 (d, *J* = 8.0 Hz, 1H), 3.88 (dd, *J*<sub>1</sub> = *J*<sub>2</sub> = 4.0 Hz, 1H), 3.76 (dd, *J*<sub>1</sub> = *J*<sub>2</sub> = 4.0 Hz, 1H), 3.30 (d, *J* = 4.0 Hz, 1H), 2.58 (t, *J* = 8.0 Hz, 1H), 2.37-2.23 (m, 3H), 1.99 (d, *J* = 12.0 Hz, 1H), 1.69 (s, 1H), 1.34 (s, 9H), 1.03 (s, 3H), 0.97 (s, 3H); <sup>13</sup>C NMR (100 MHz, CDCl<sub>3</sub>) δ 194.2, 153.0, 149.9, 141.8, 139.2, 138.7, 137.7, 136.8, 136.6, 135.0, 130.0, 129.0, 128.8 (2C), 128.0, 127.9 (2C), 127.8, 127.2, 124.8, 123.1, 120.6, 115.3, 111.0, 107.9, 87.9, 83.7, 83.2, 82.5, 80.3, 59.0, 57.7, 55.7, 51.6, 50.1, 45.8, 42.1, 39.3, 33.1, 29.7, 26.4, 25.0. IR (KBr) ν 3445, 3034, 2956, 2870, 1734, 1637, 1589, 1542, 1327, 743 cm<sup>-1</sup>. HRMS (ESI) calcd for C<sub>51</sub>H<sub>51</sub>N<sub>6</sub>O<sub>7</sub> [M+H]<sup>+</sup> 859.3814, found 859.3818.

## 9. Crystal structures of 3a, 3zb, 5m, 6n, 10g, 10p and 11

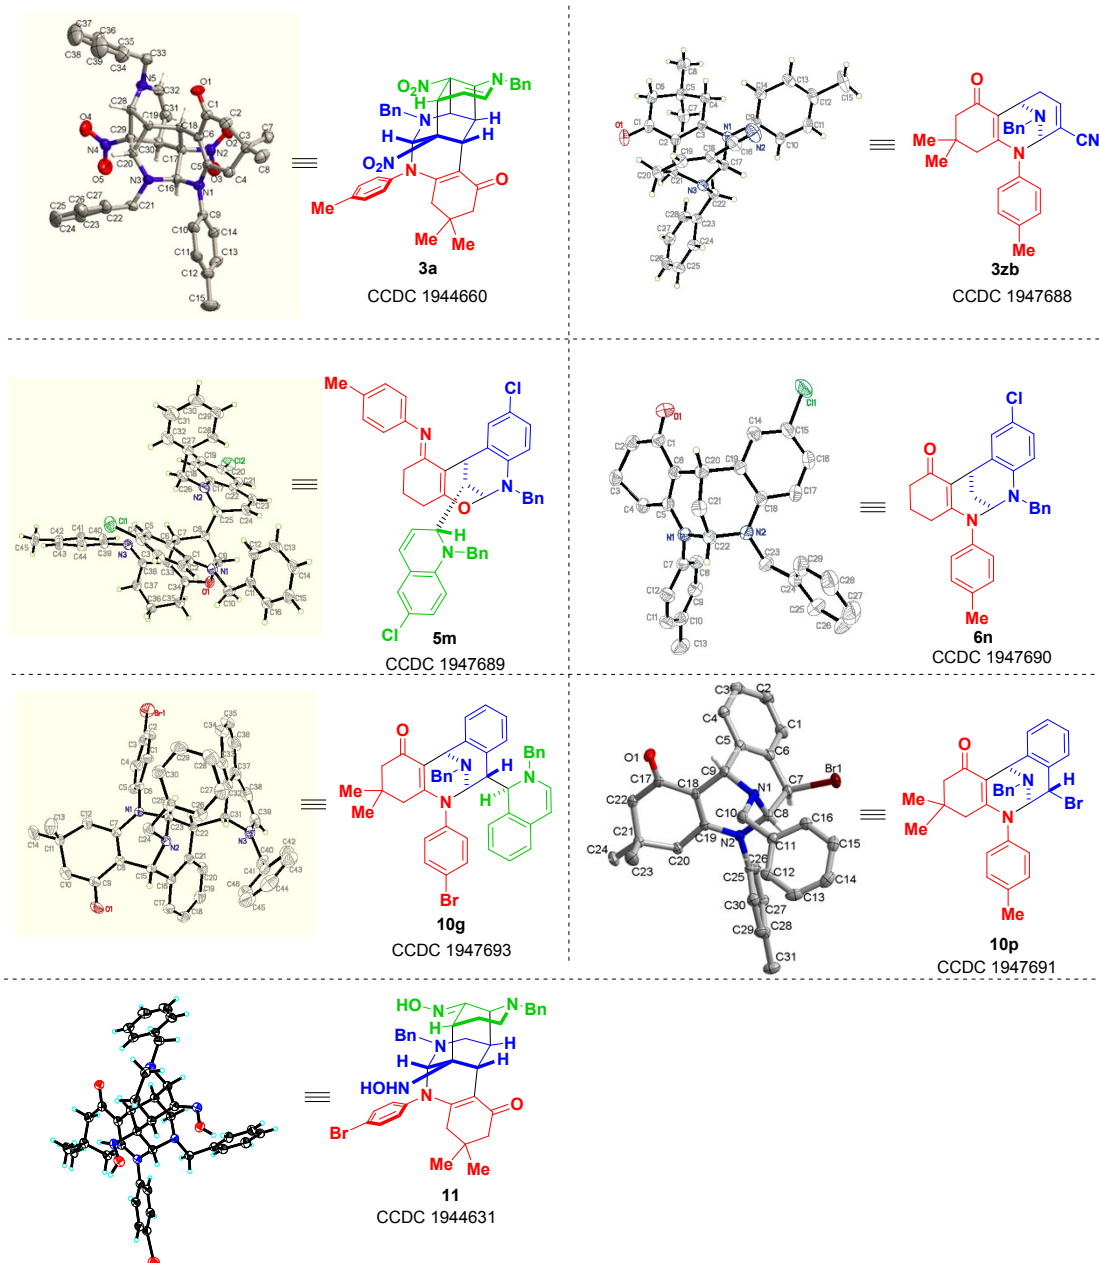

Figure S1. X-ray structures of **3a**, **3zb**, **5m**, **6n**, **10g**, **10p** and **11**. Displacement ellipsoids are drawn at the 30% probability level.

## 10. <sup>1</sup>H NMR and <sup>13</sup>C NMR spectra

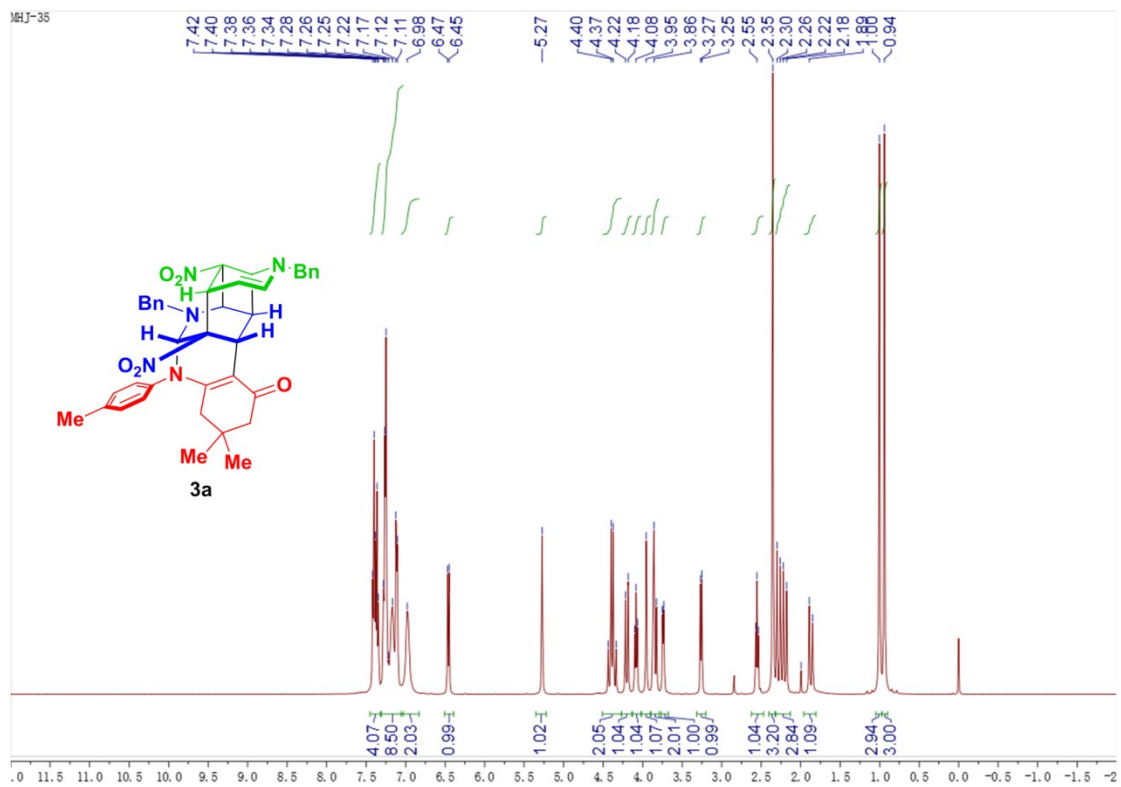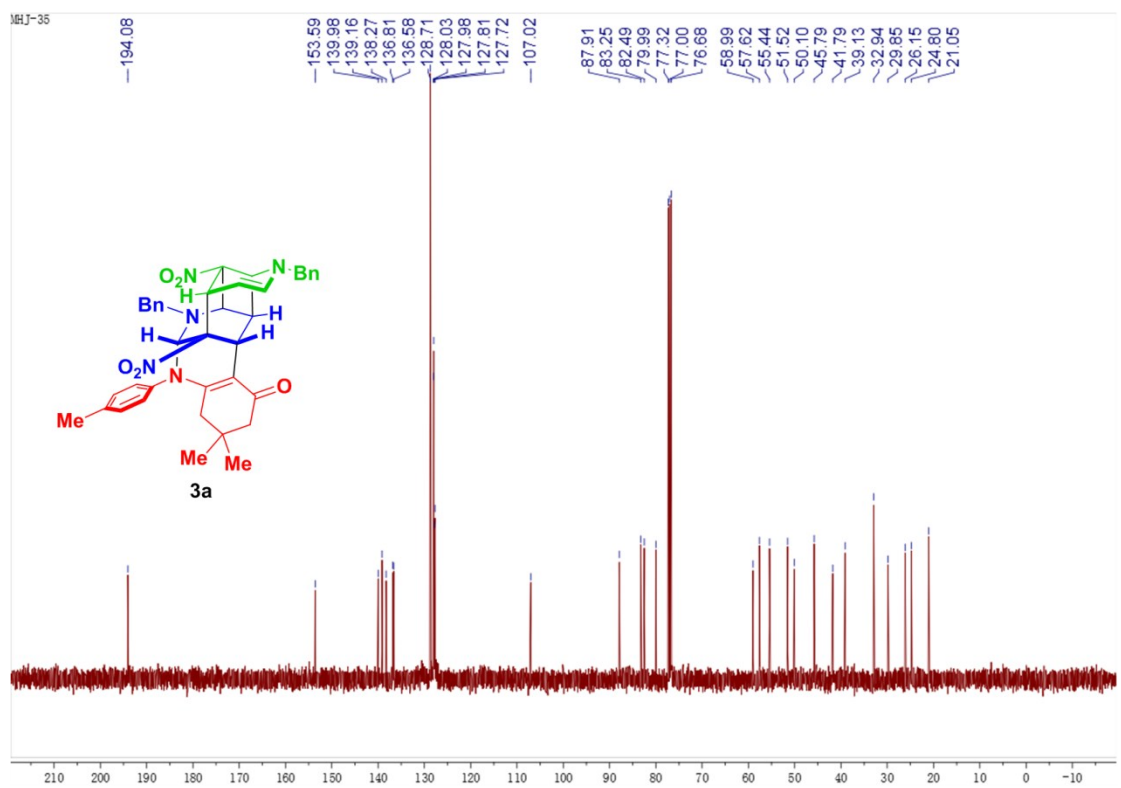

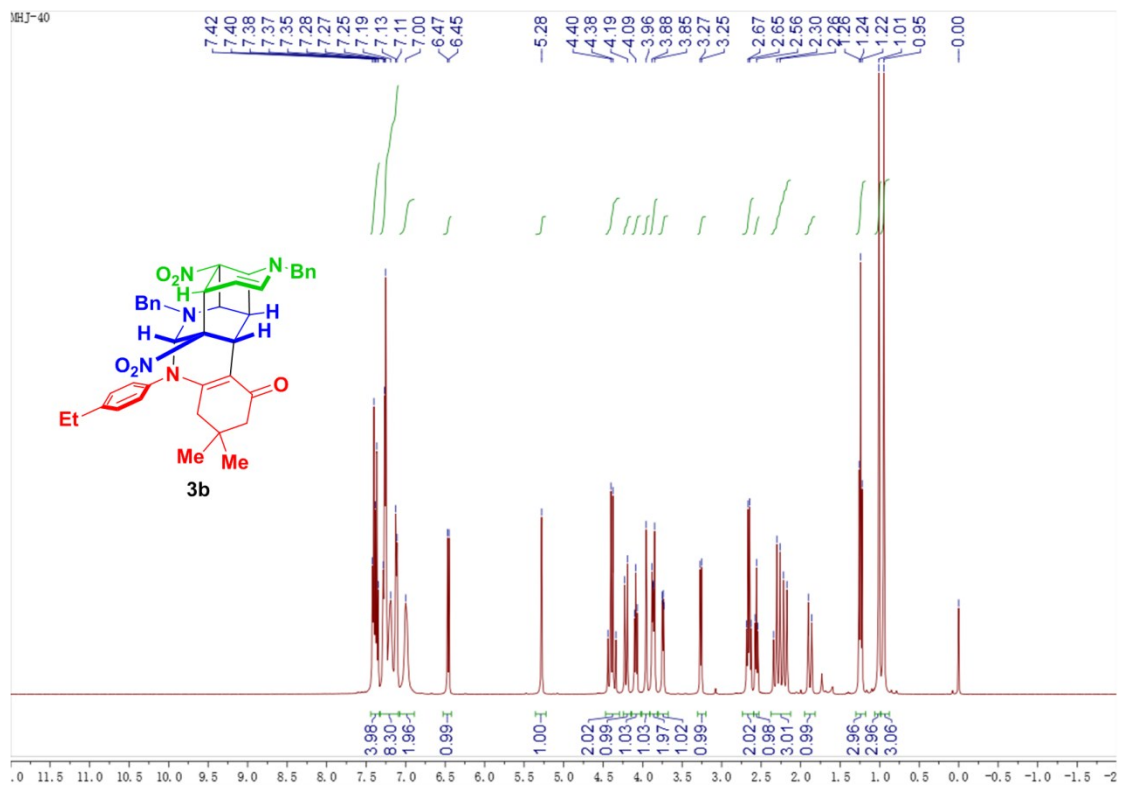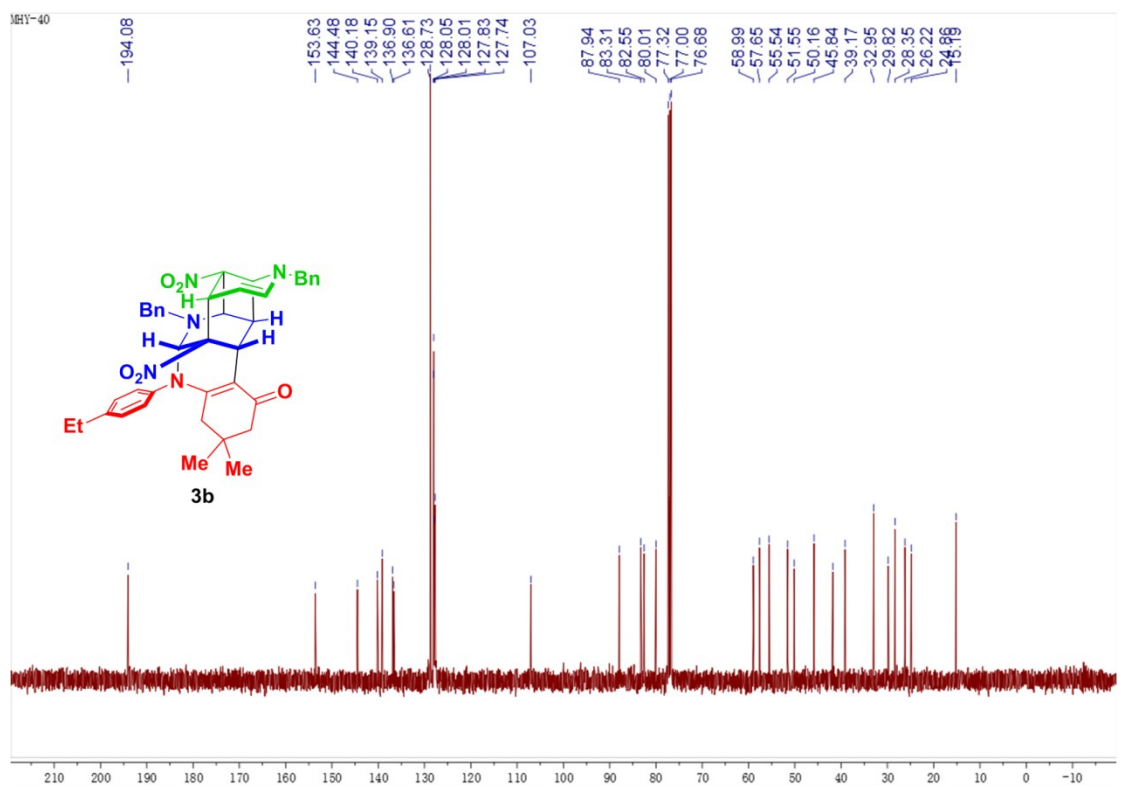



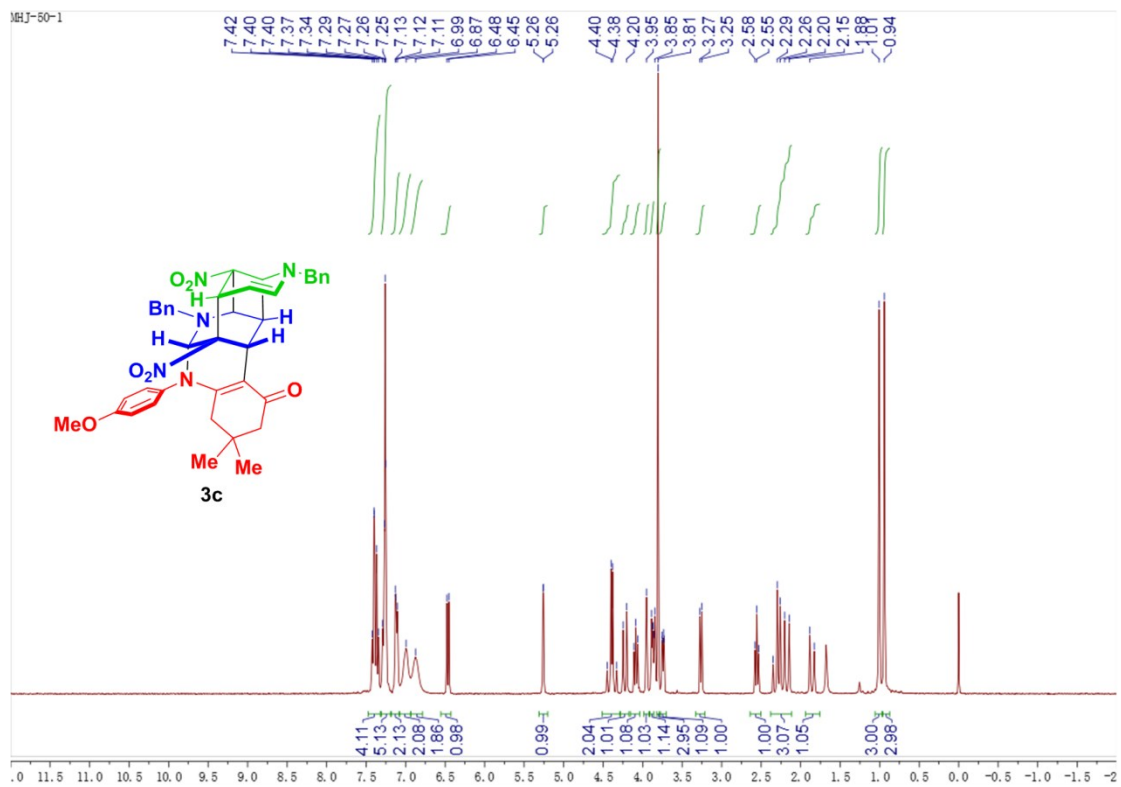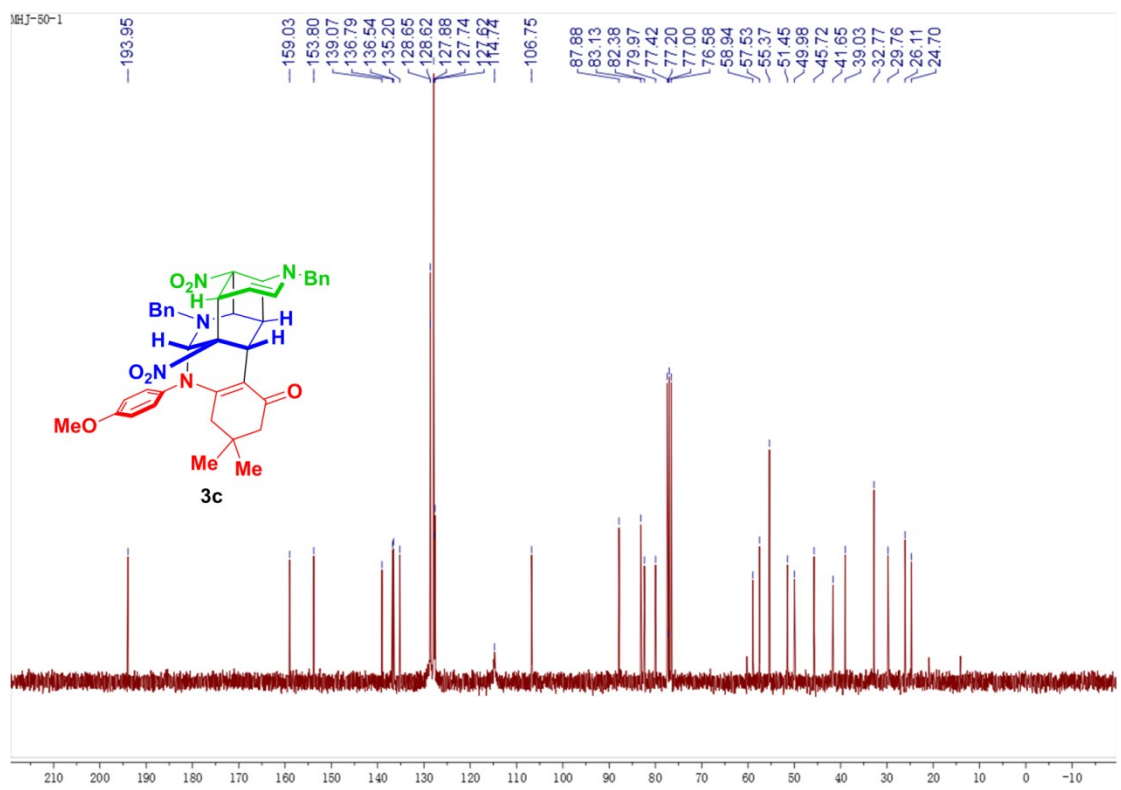

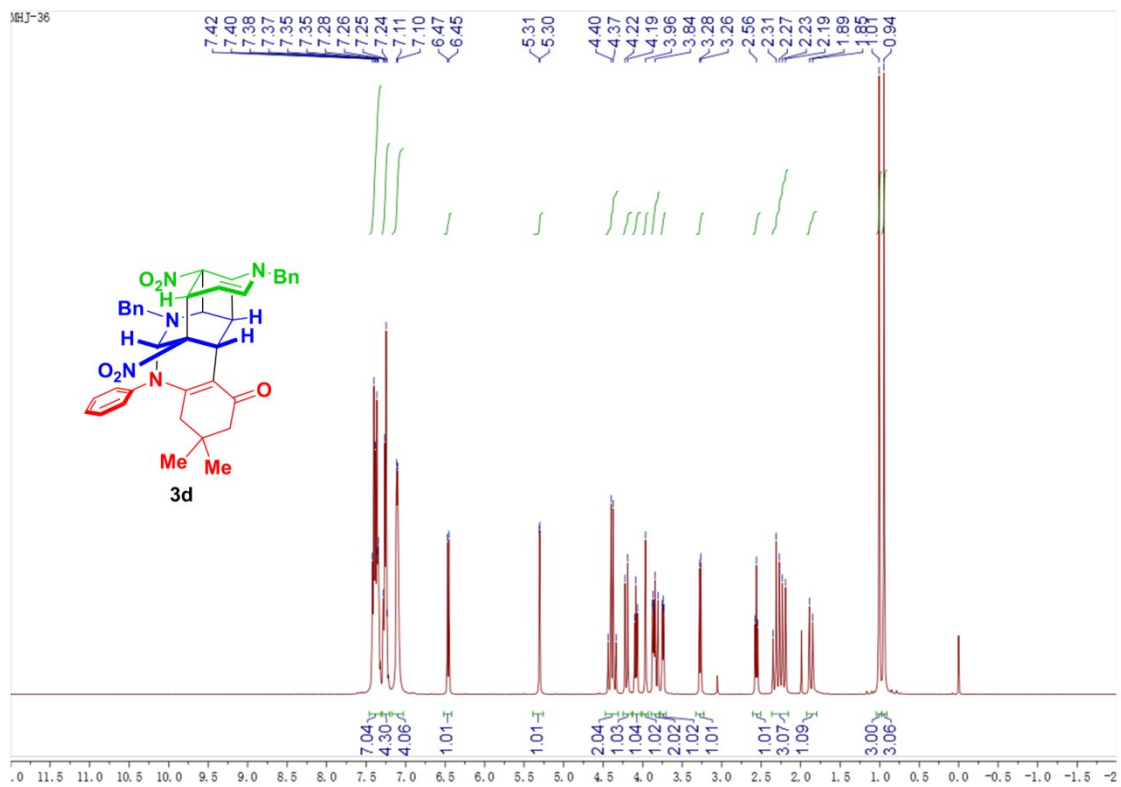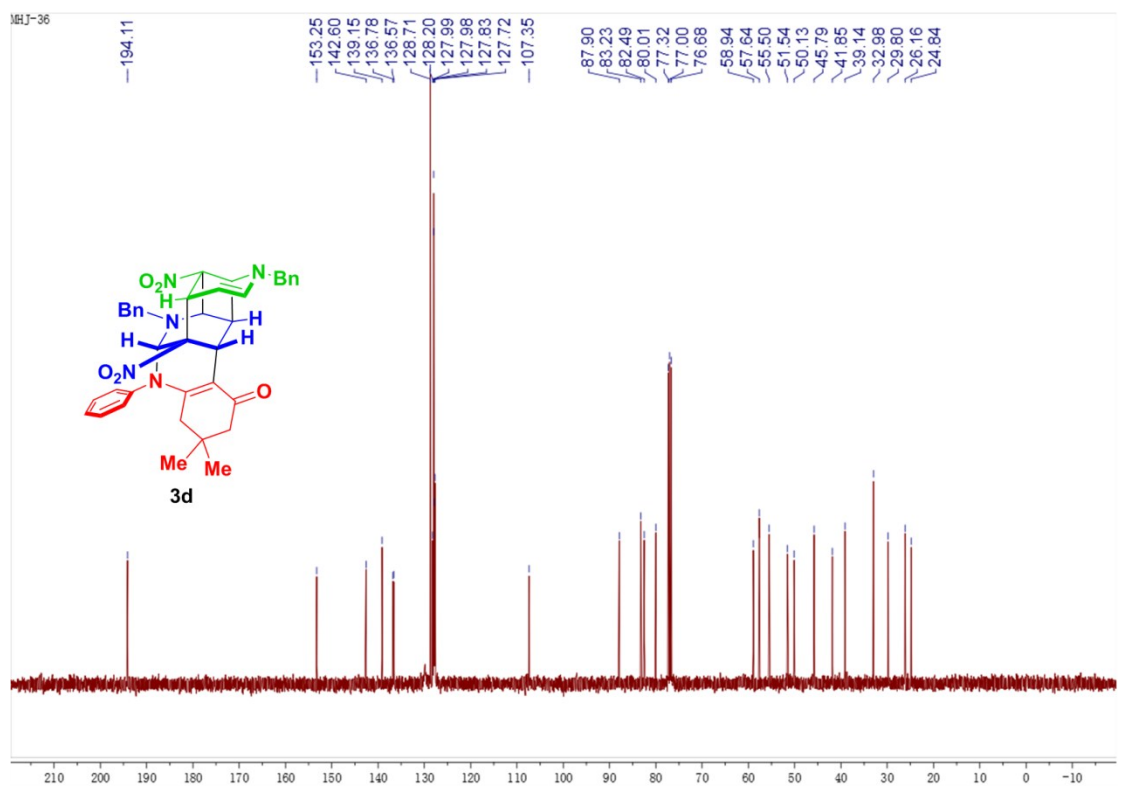

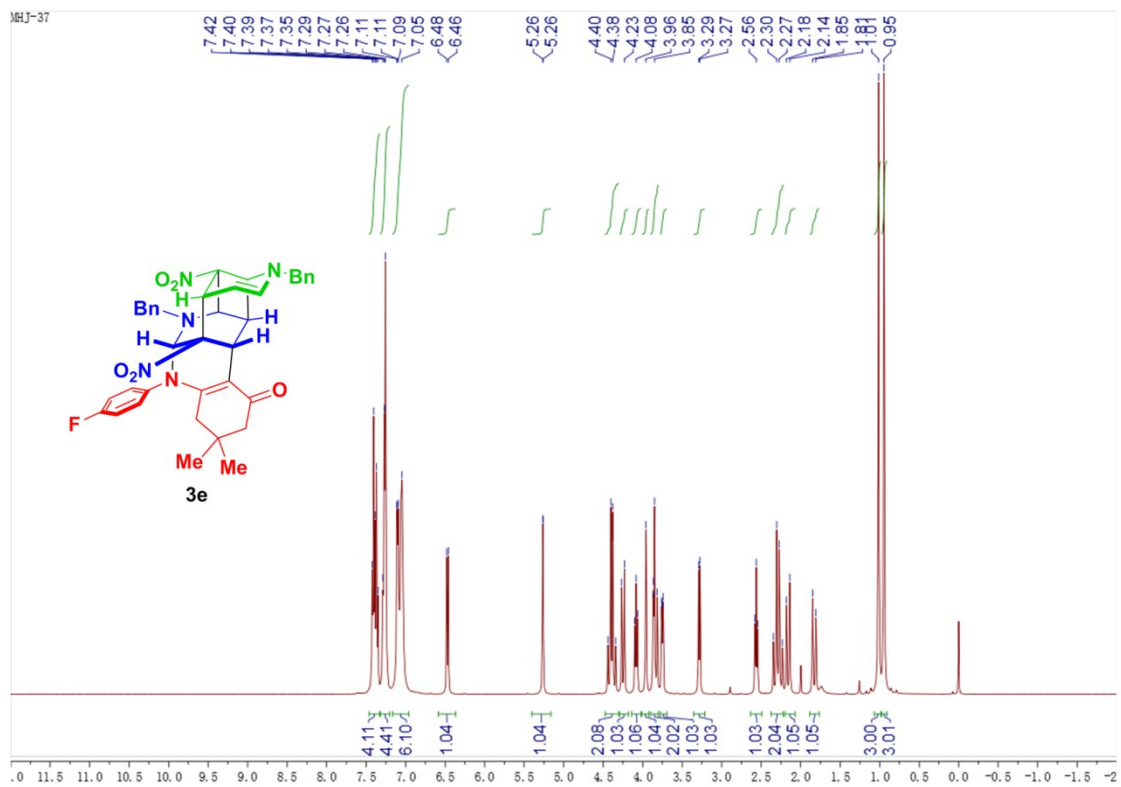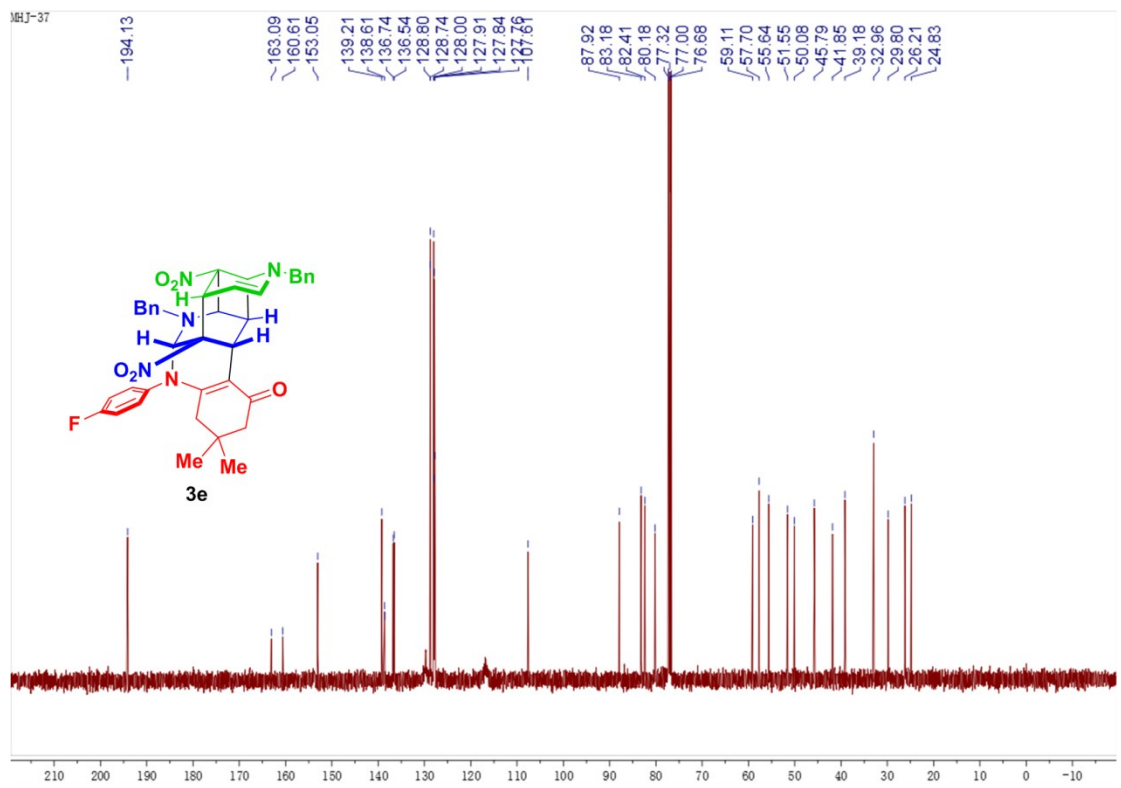

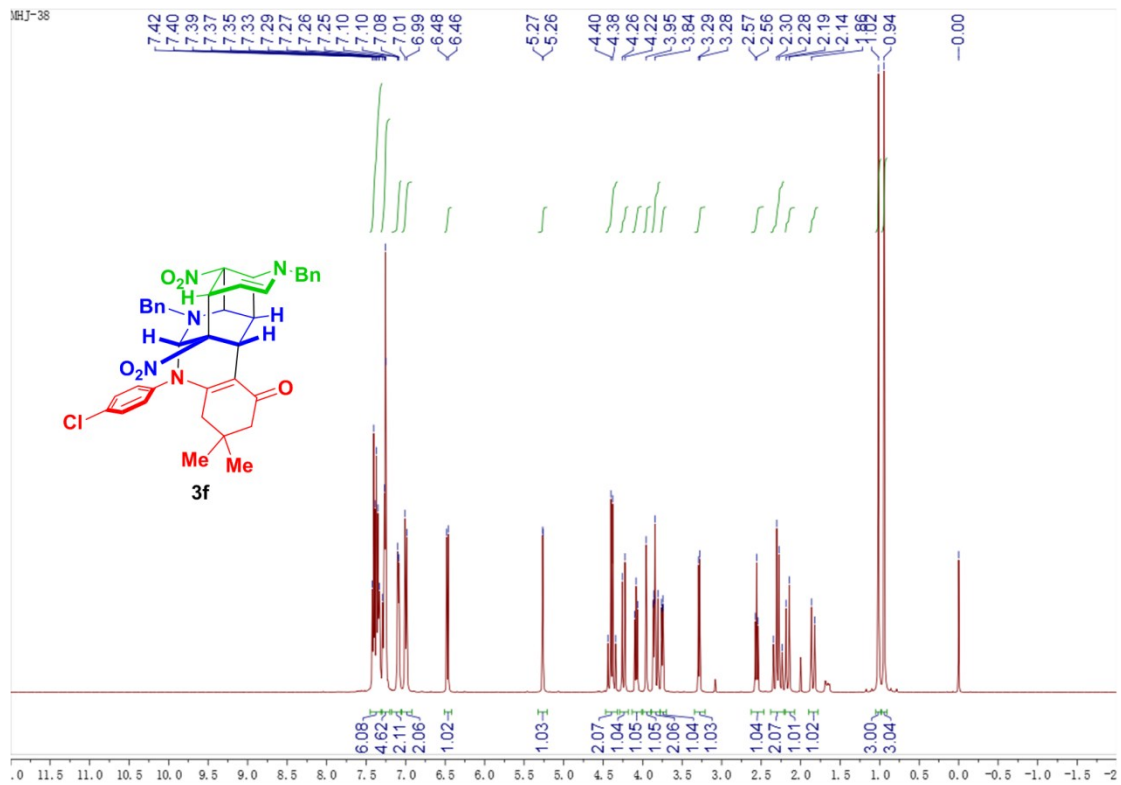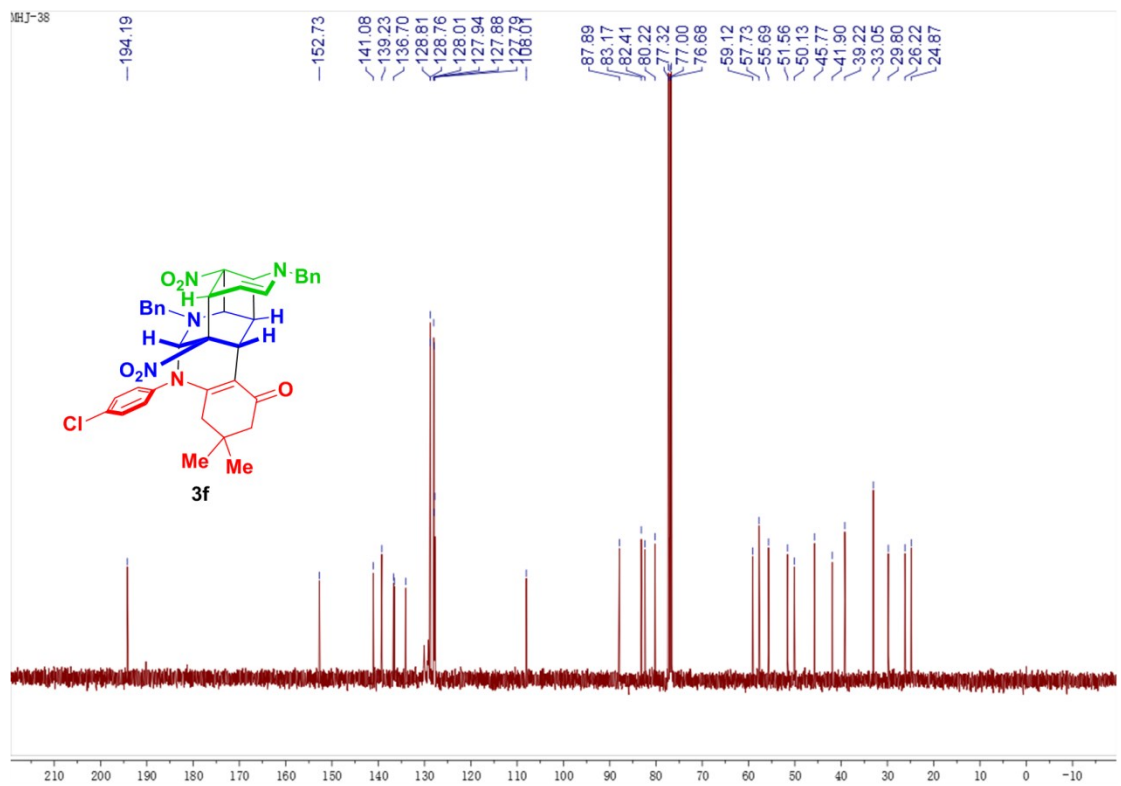

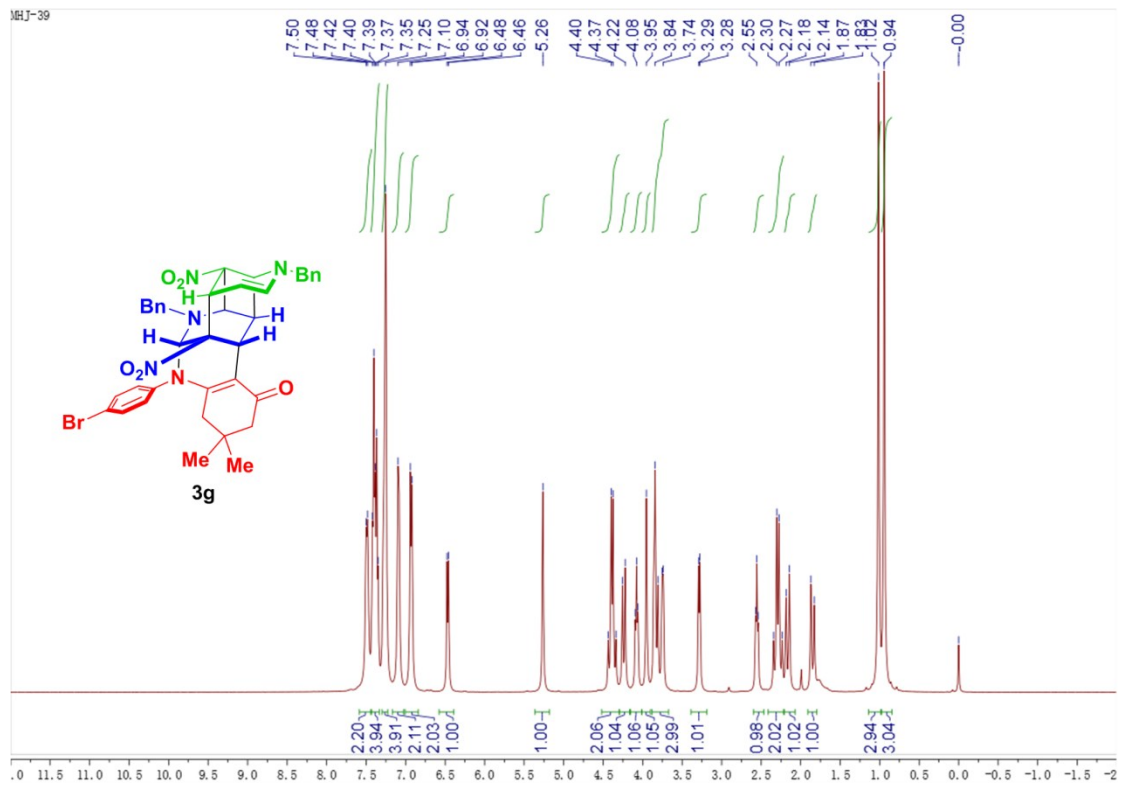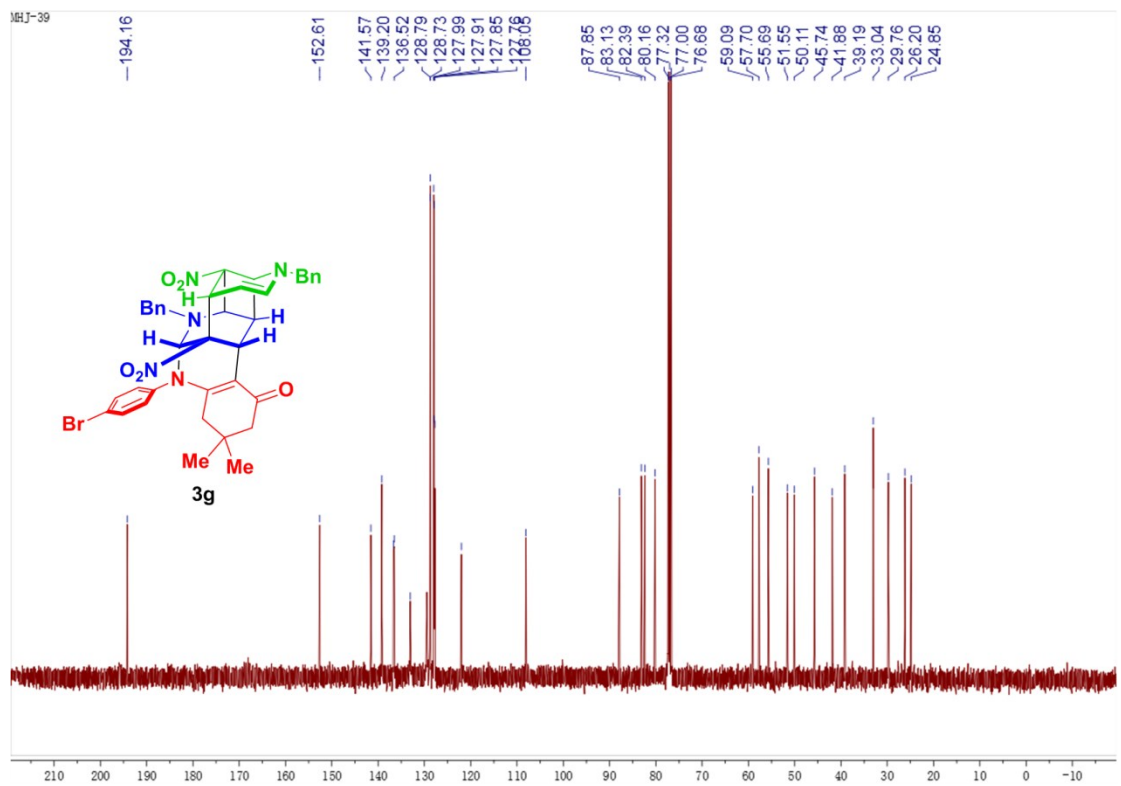

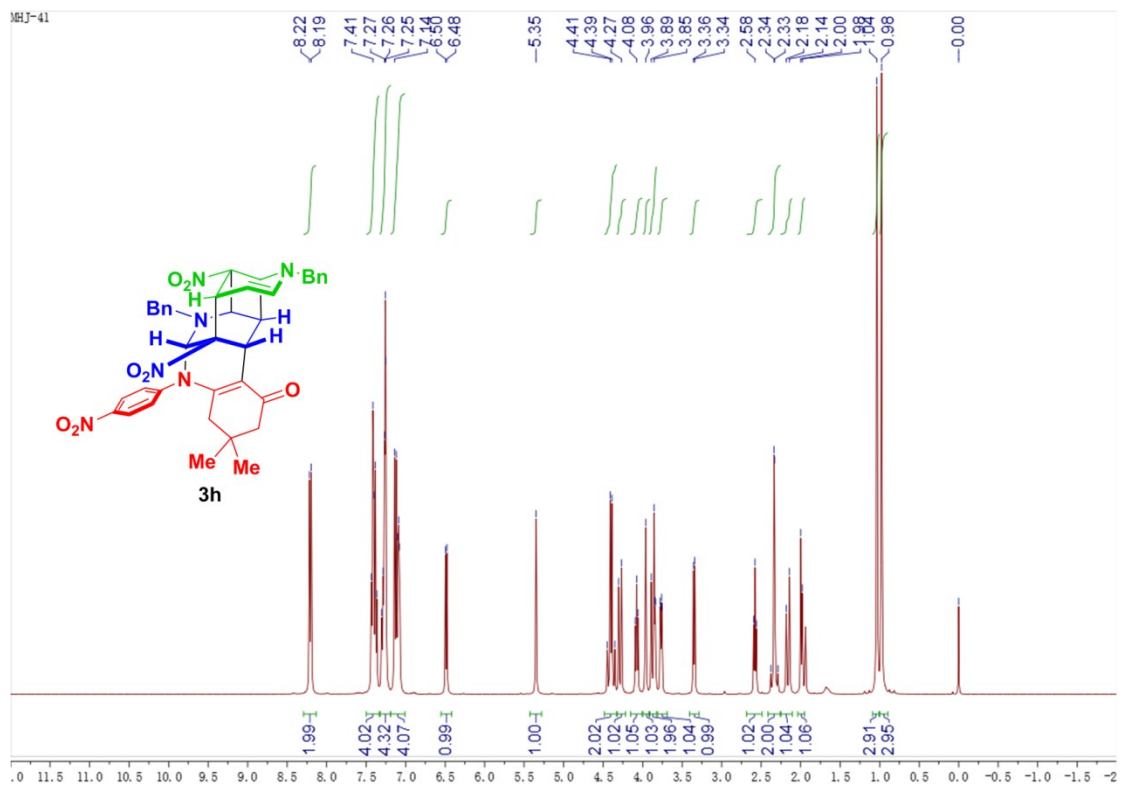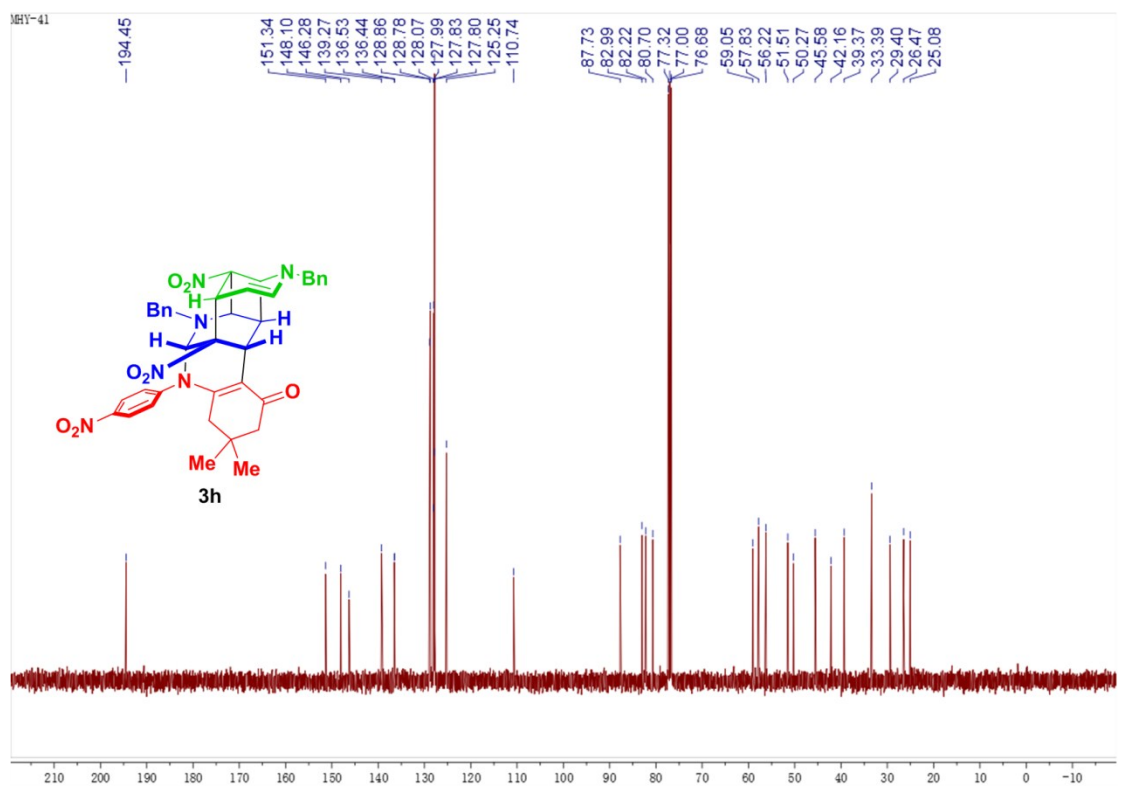

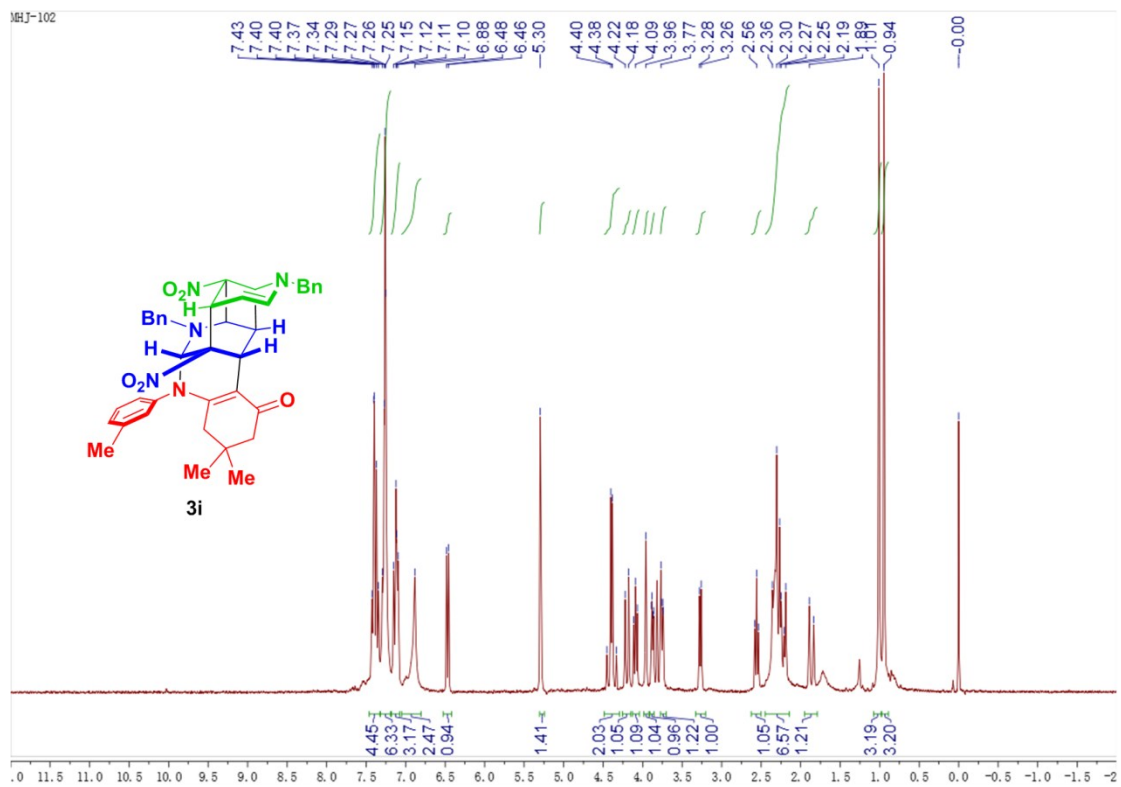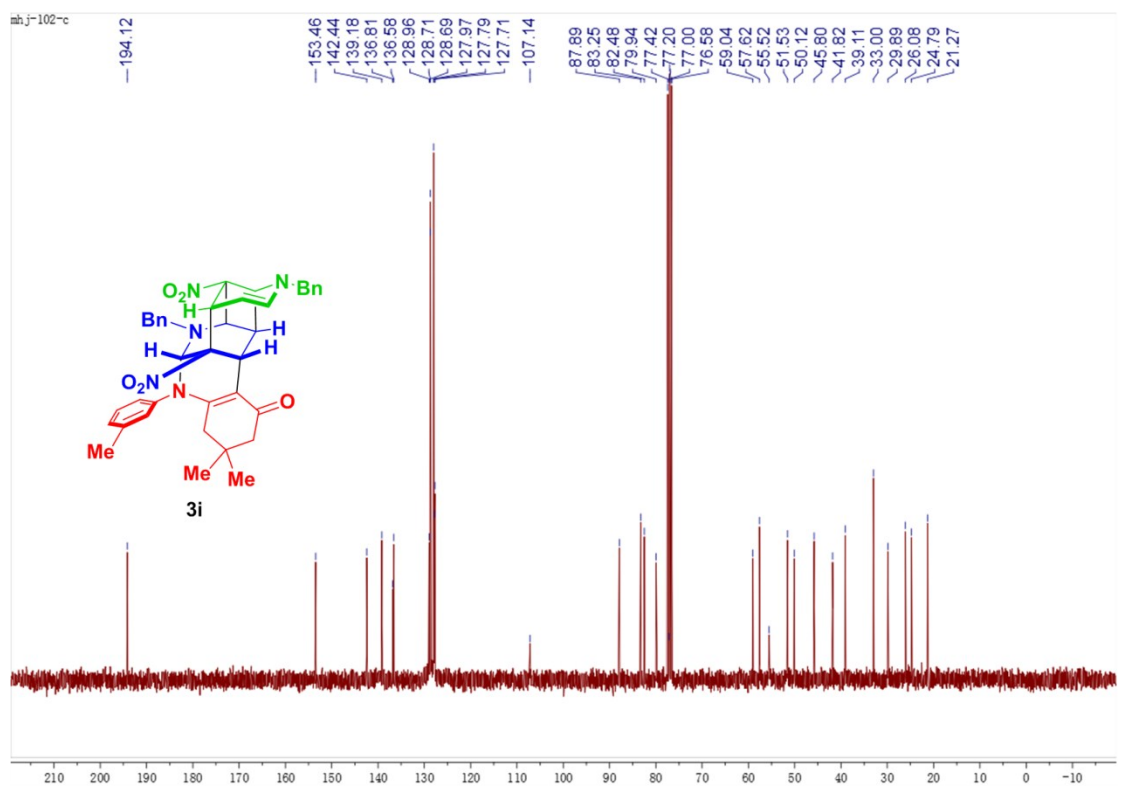

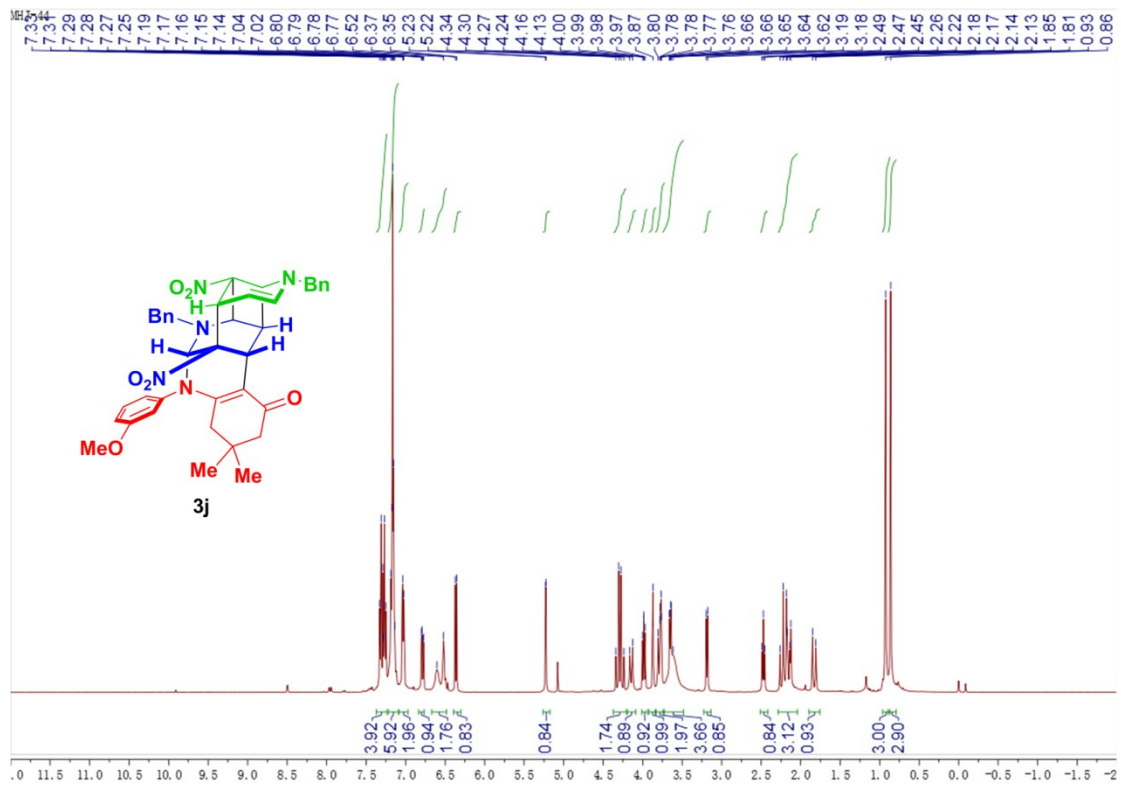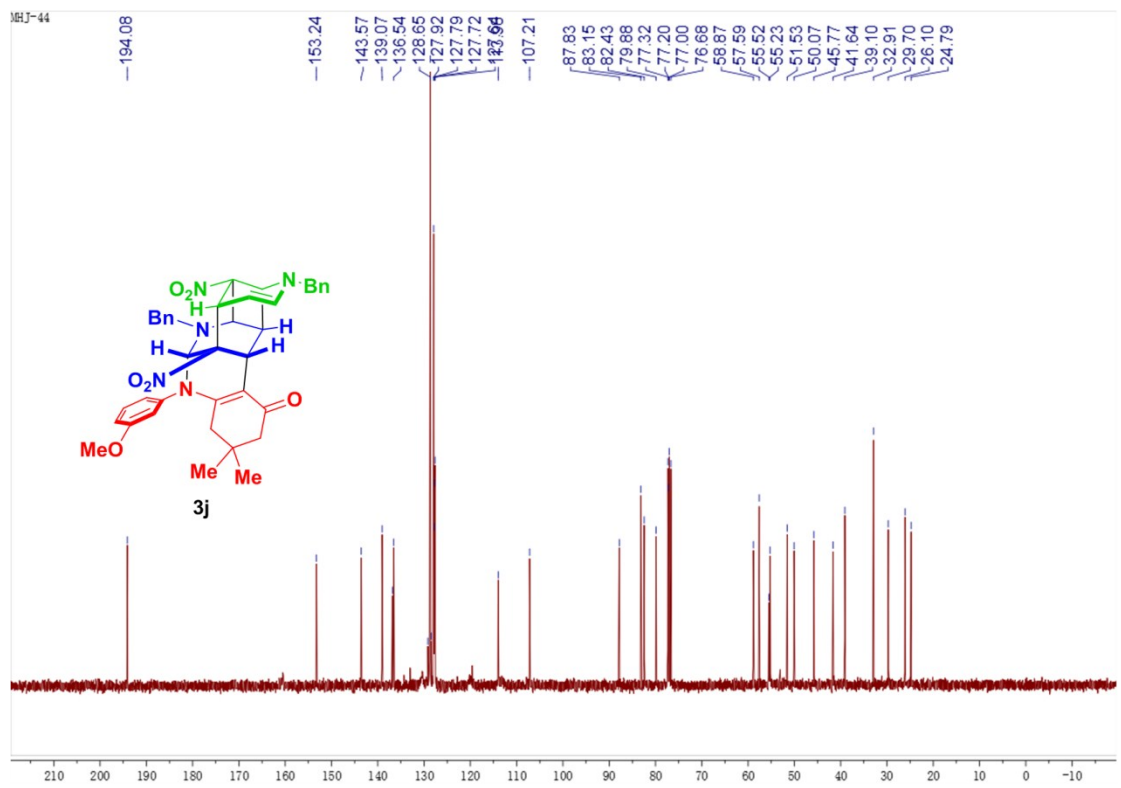



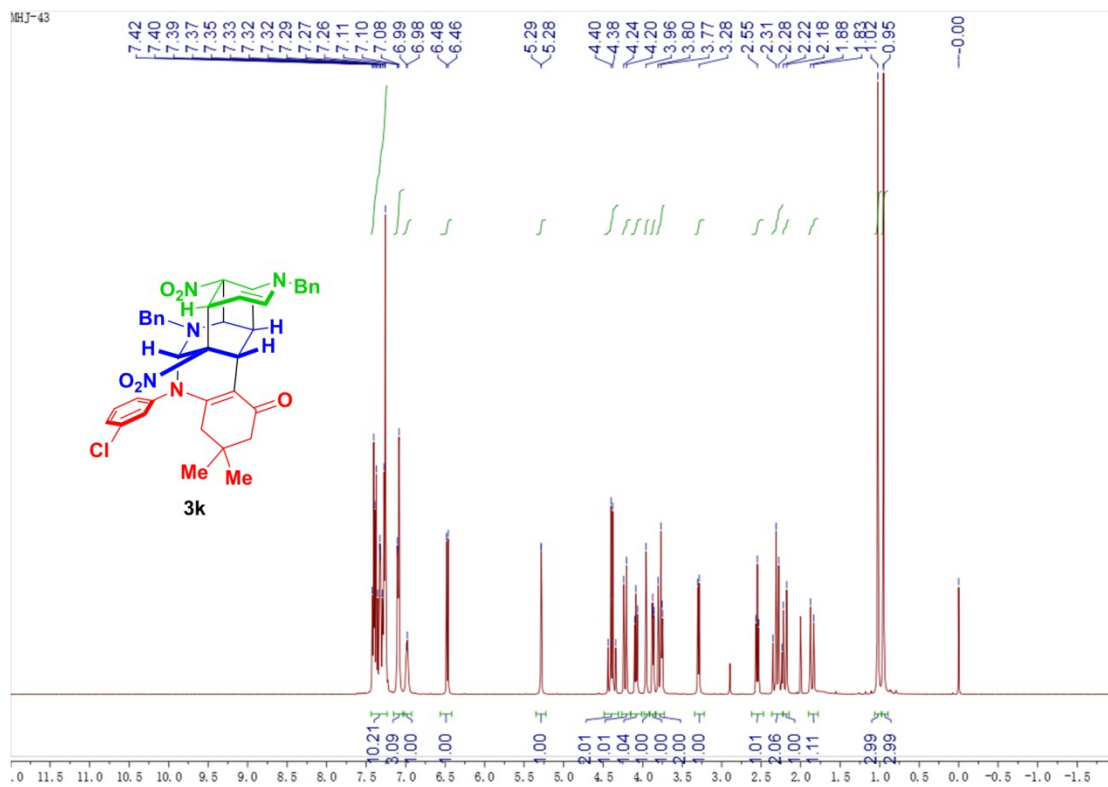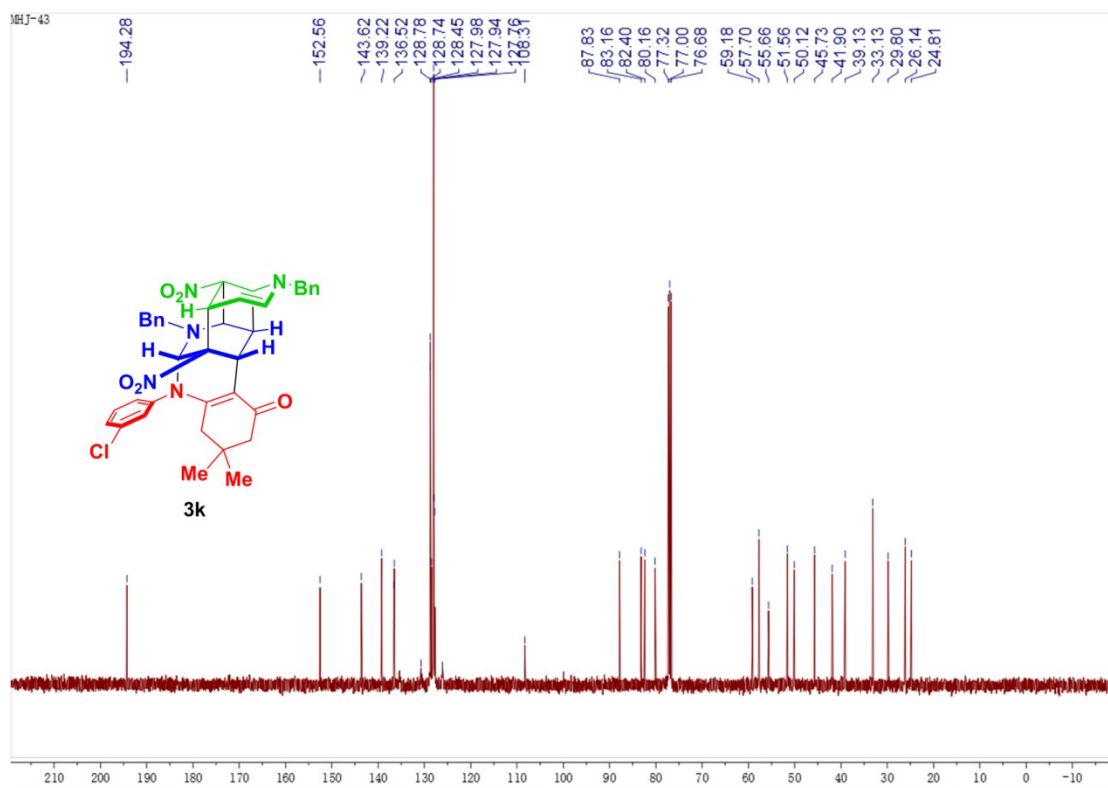

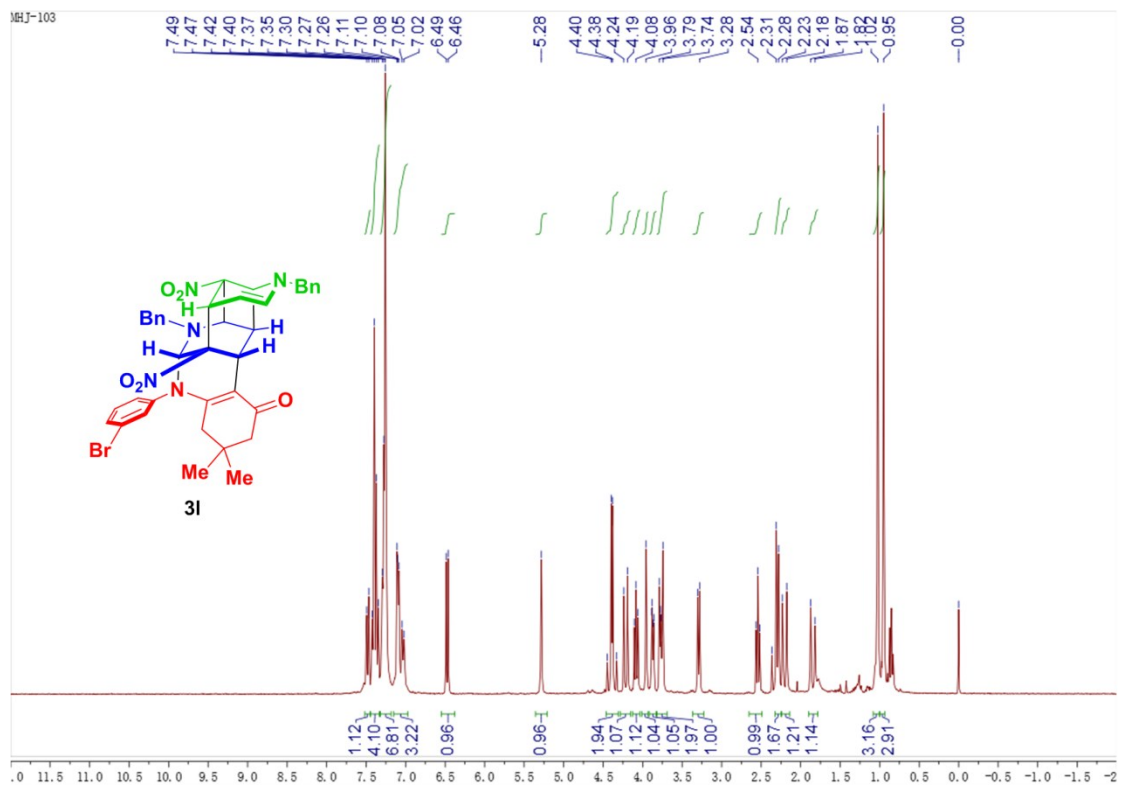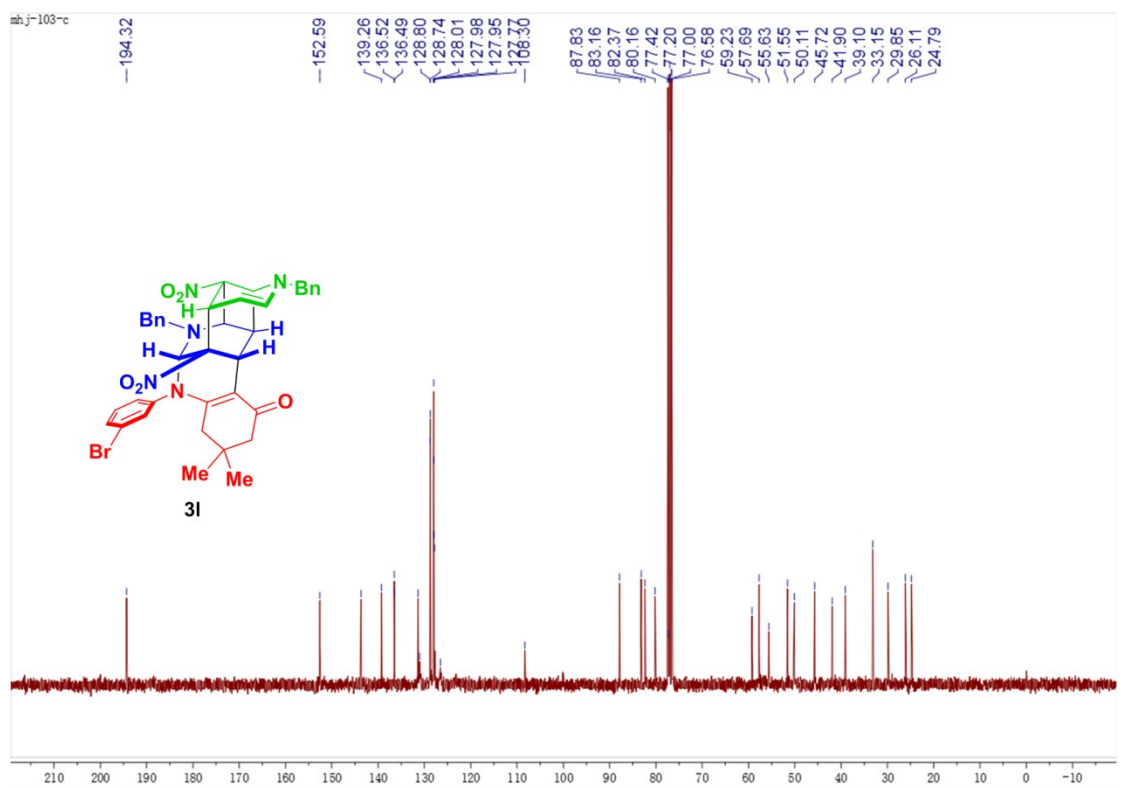

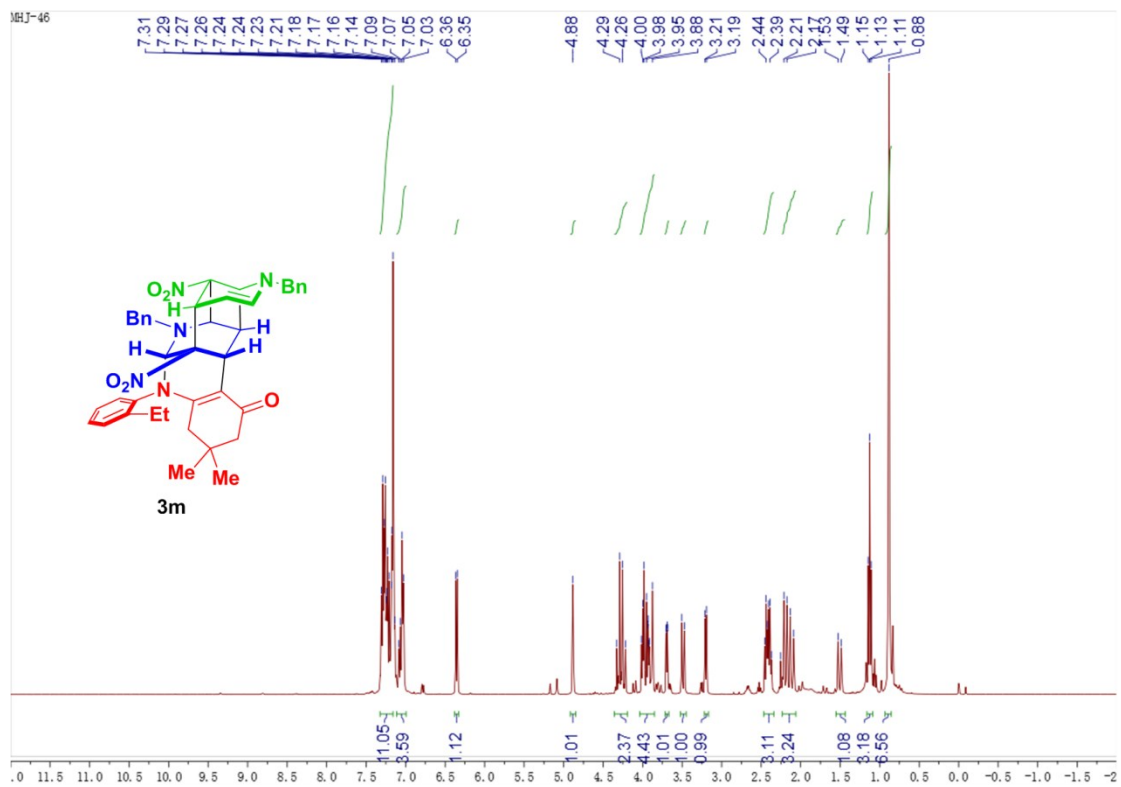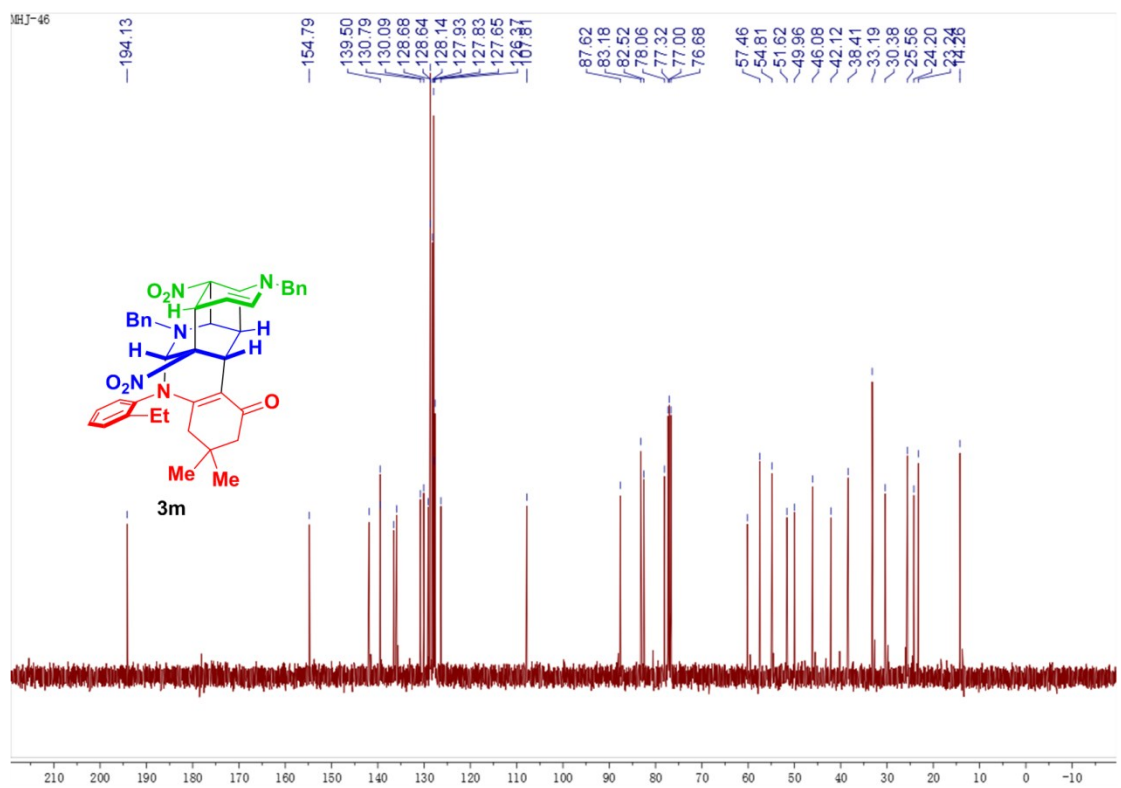

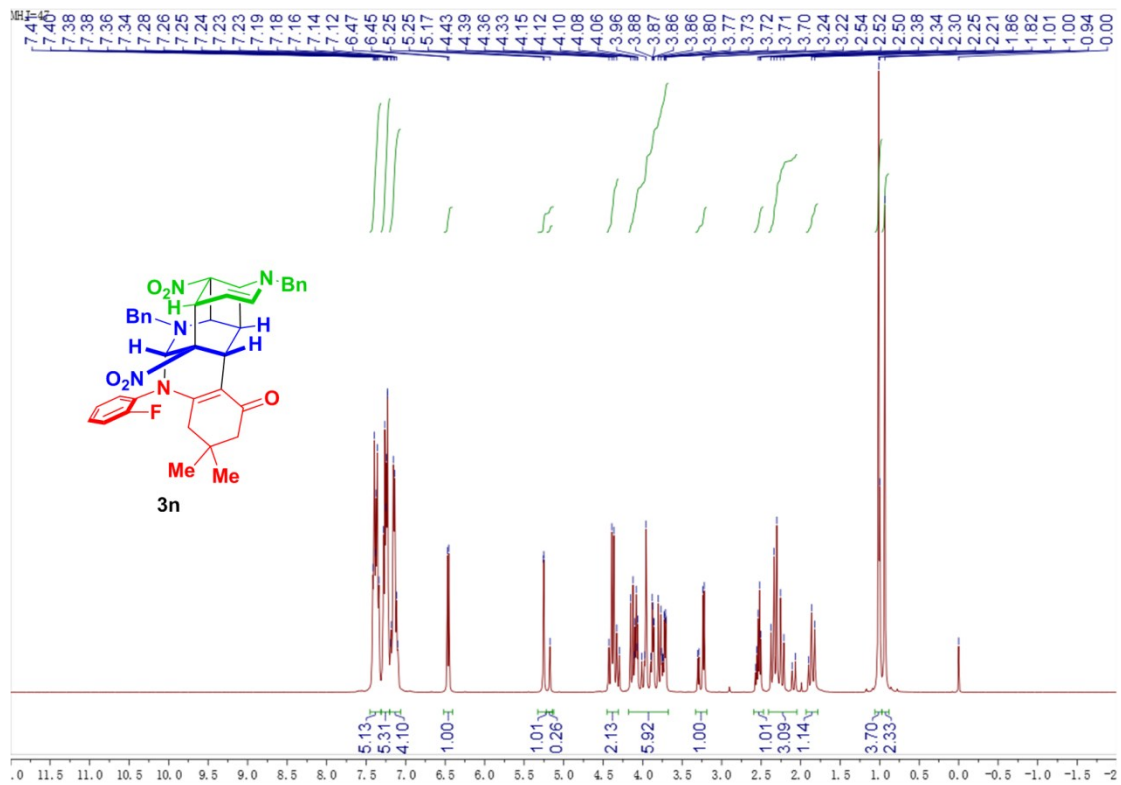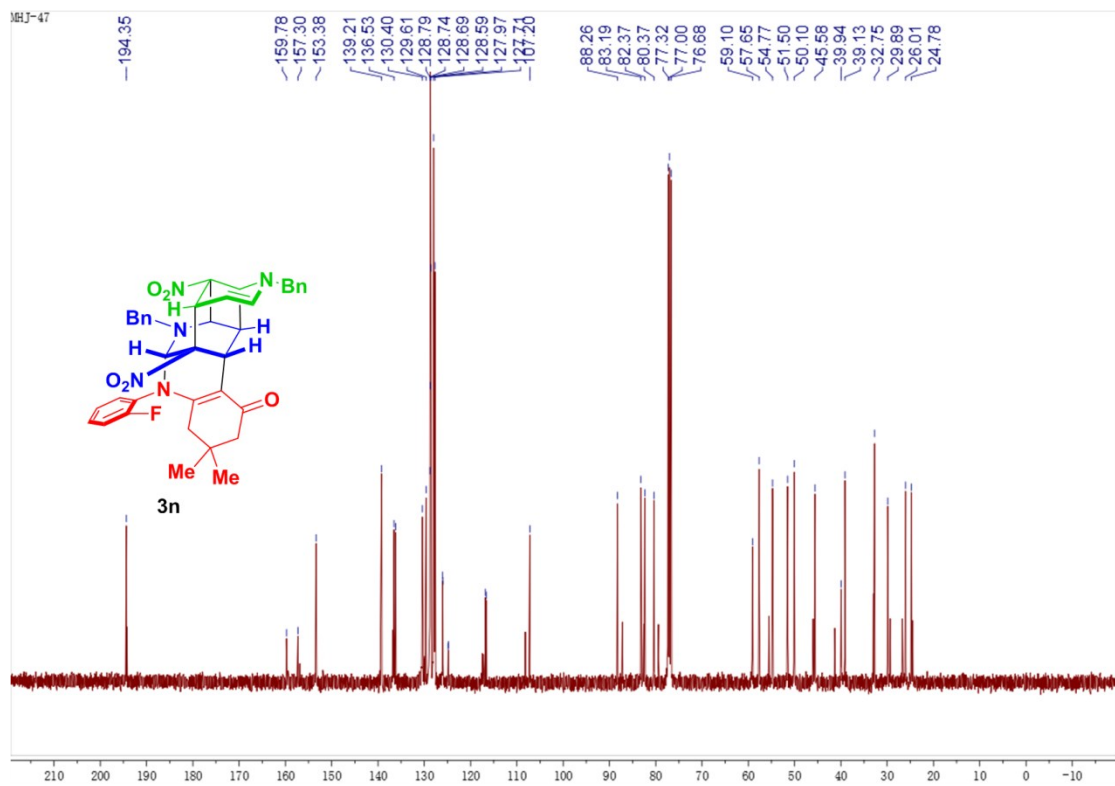

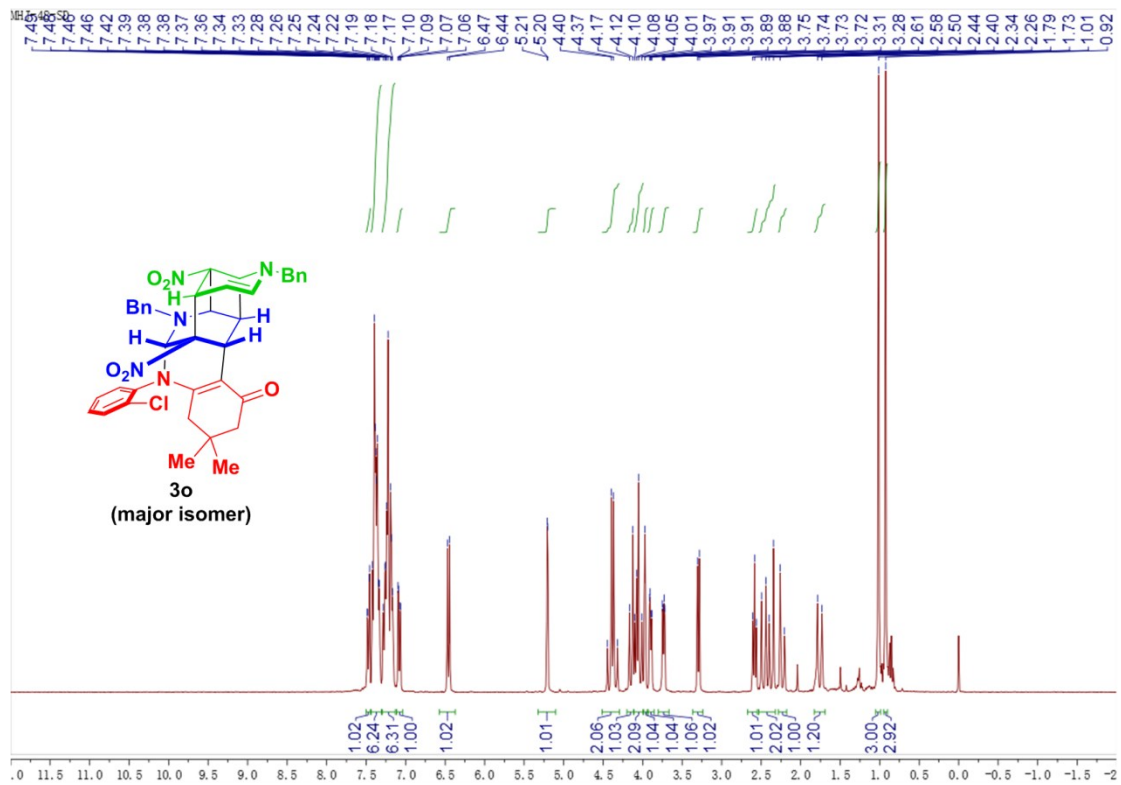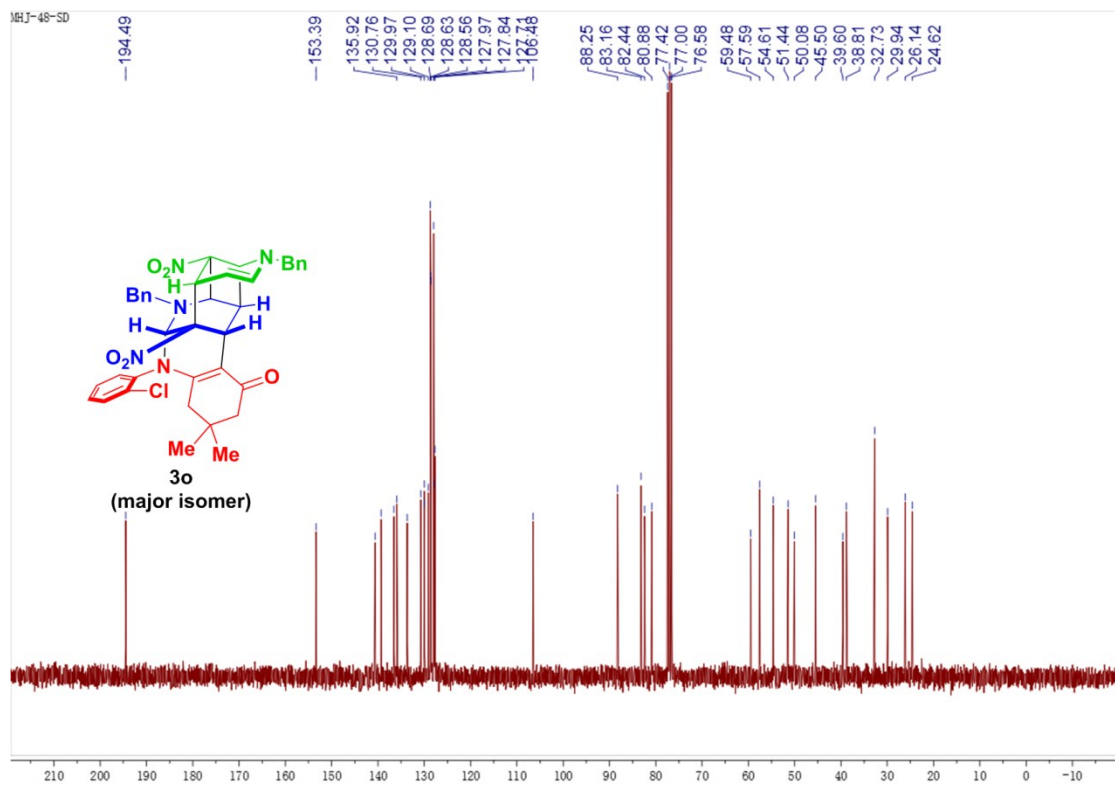

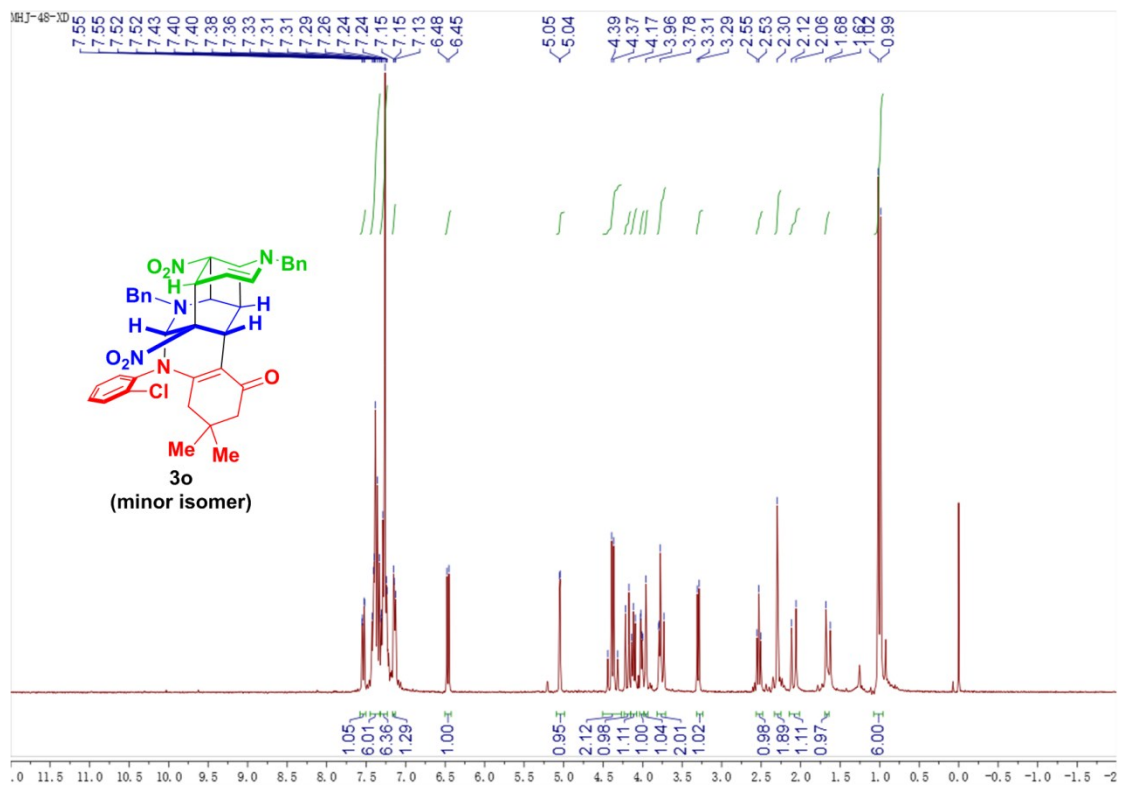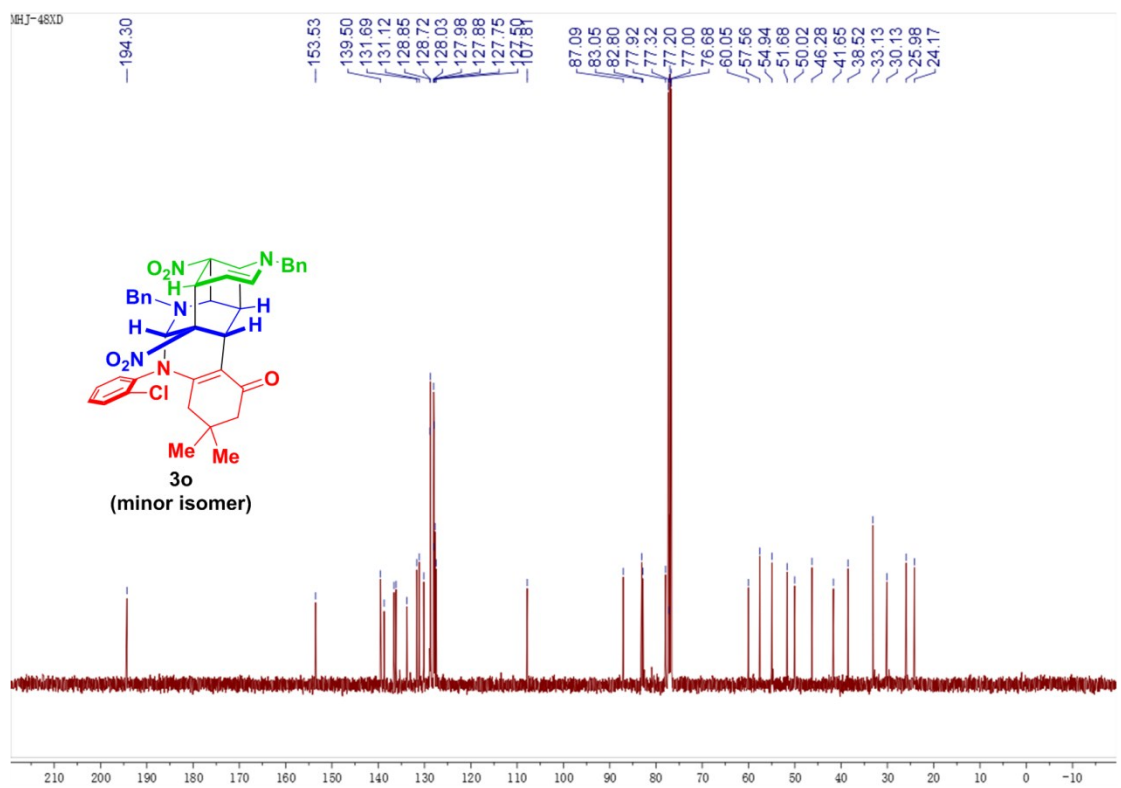

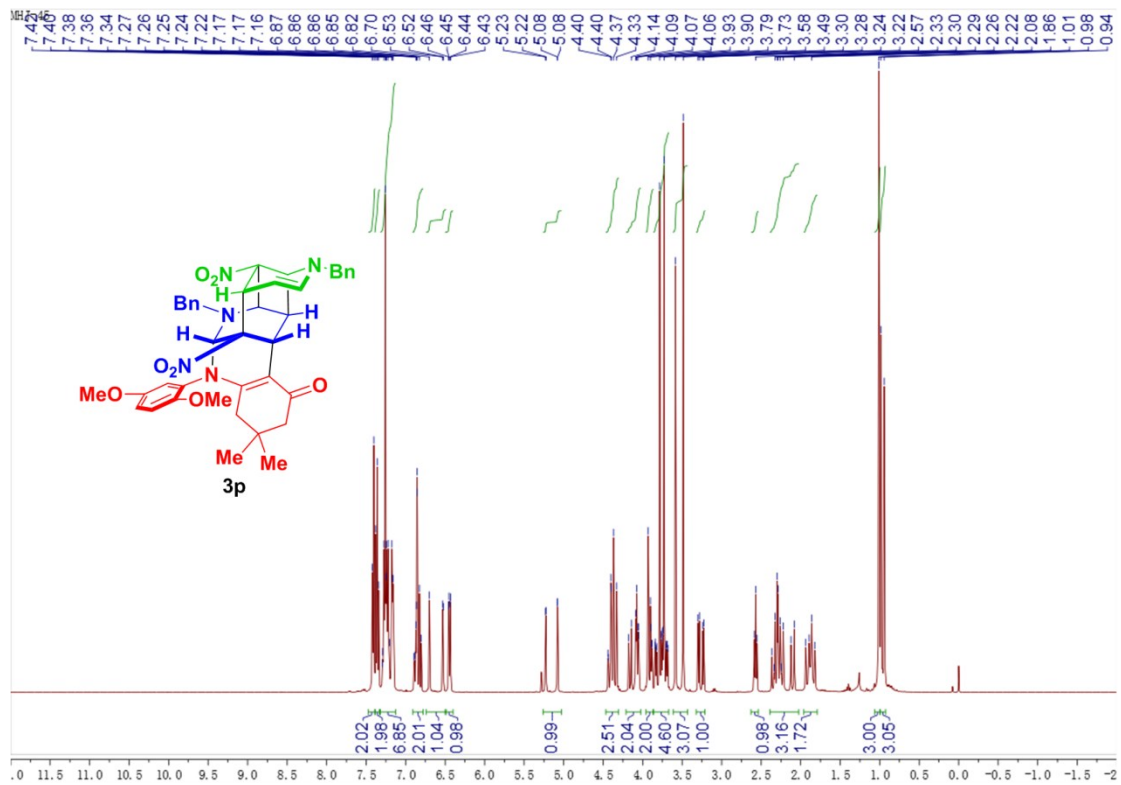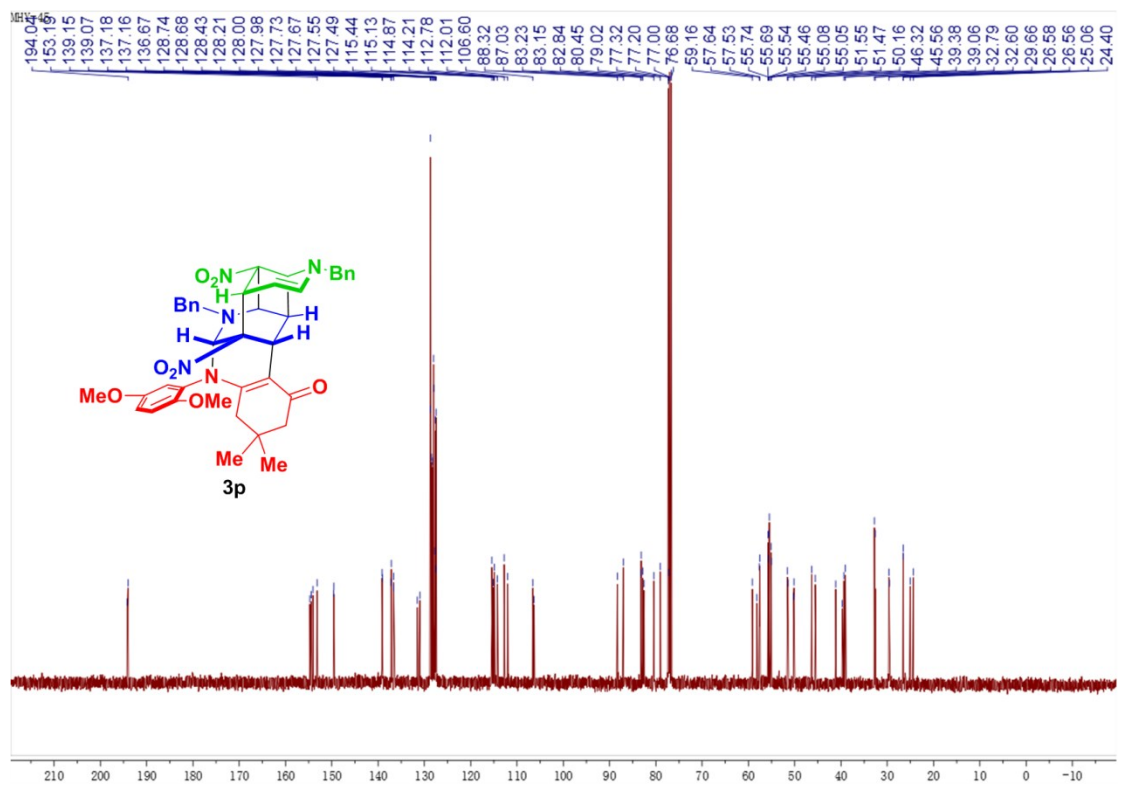

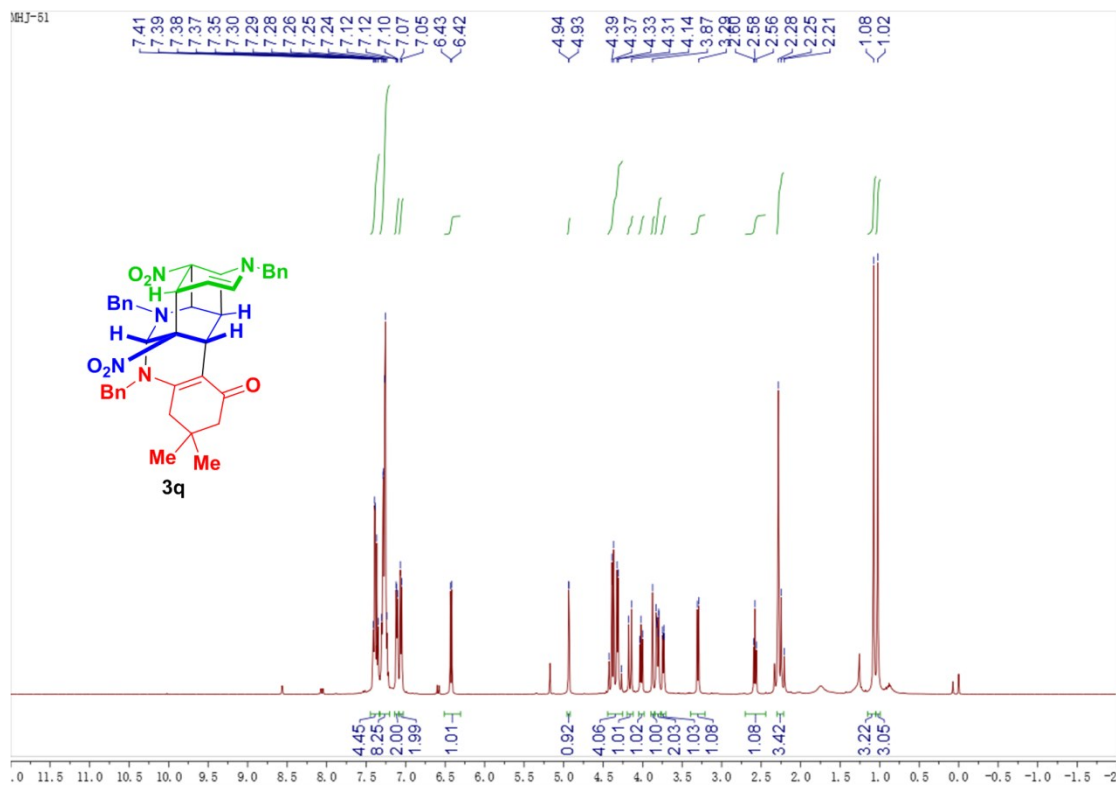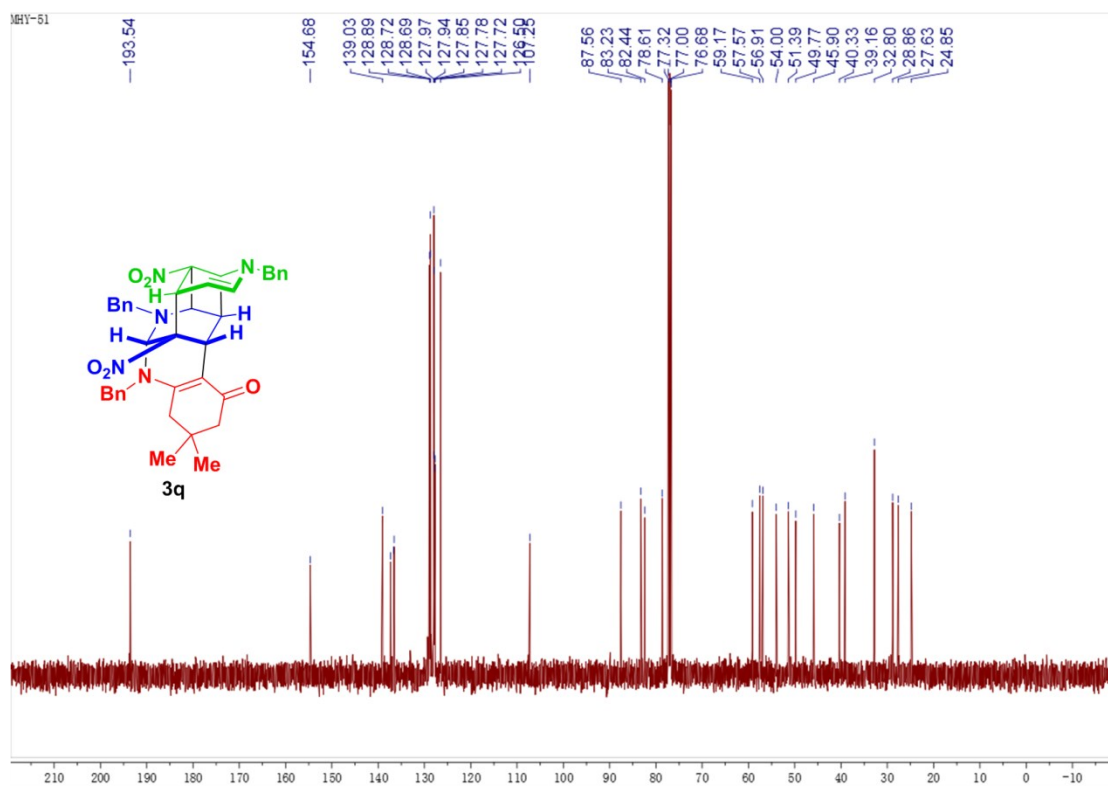



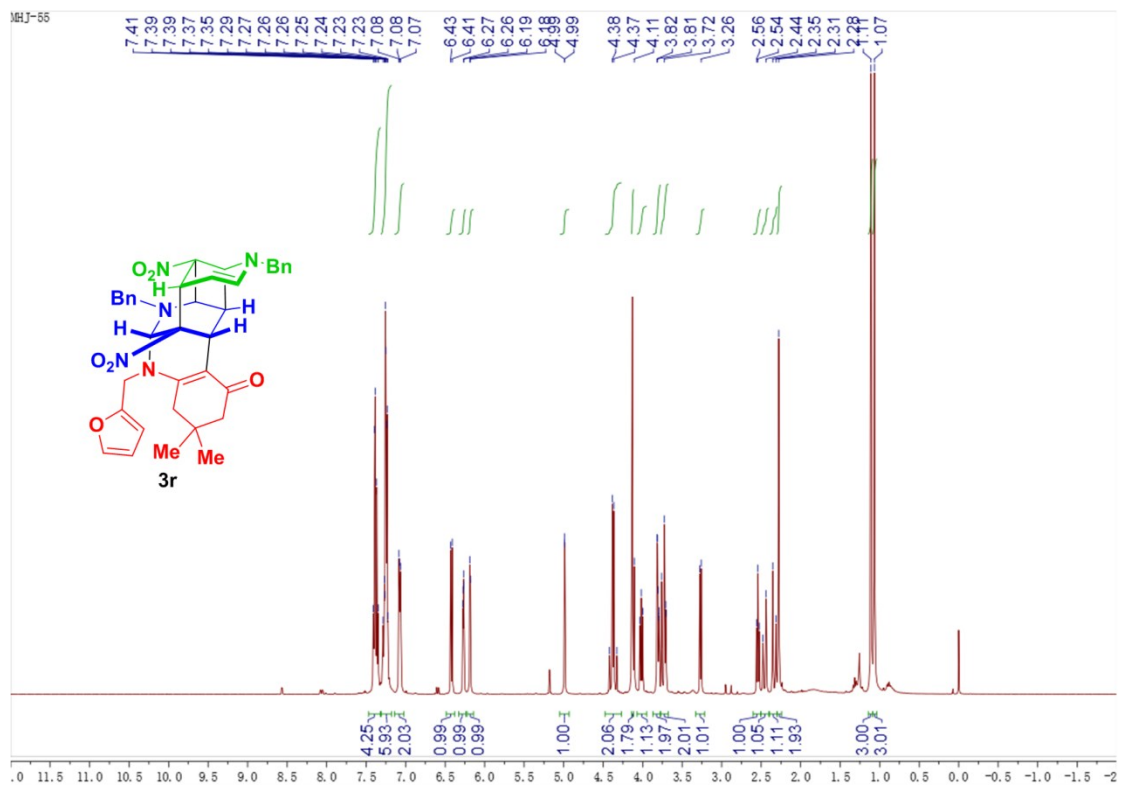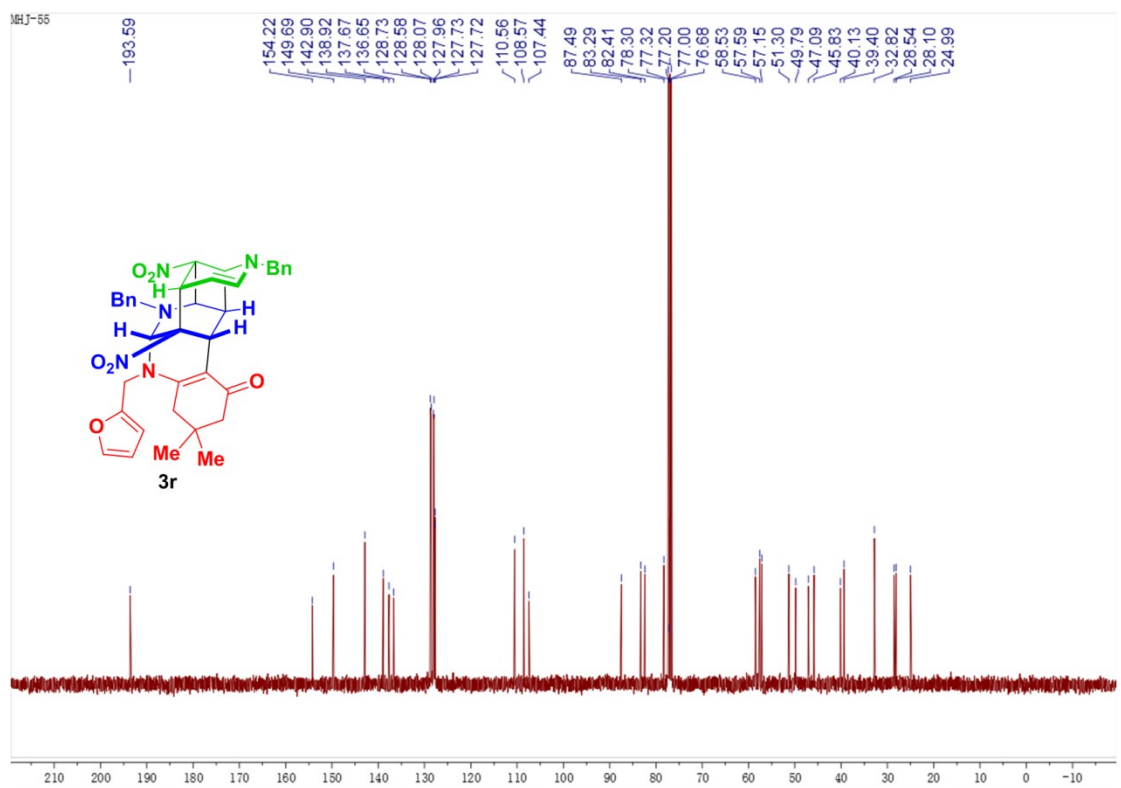

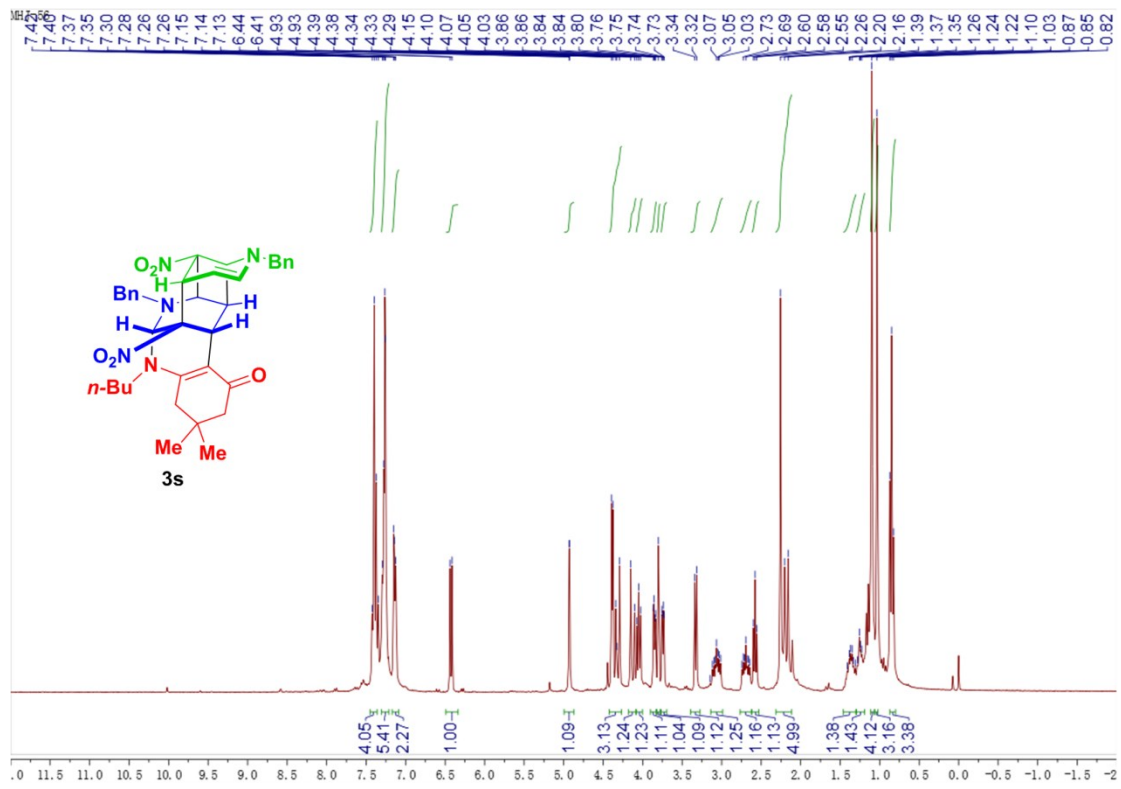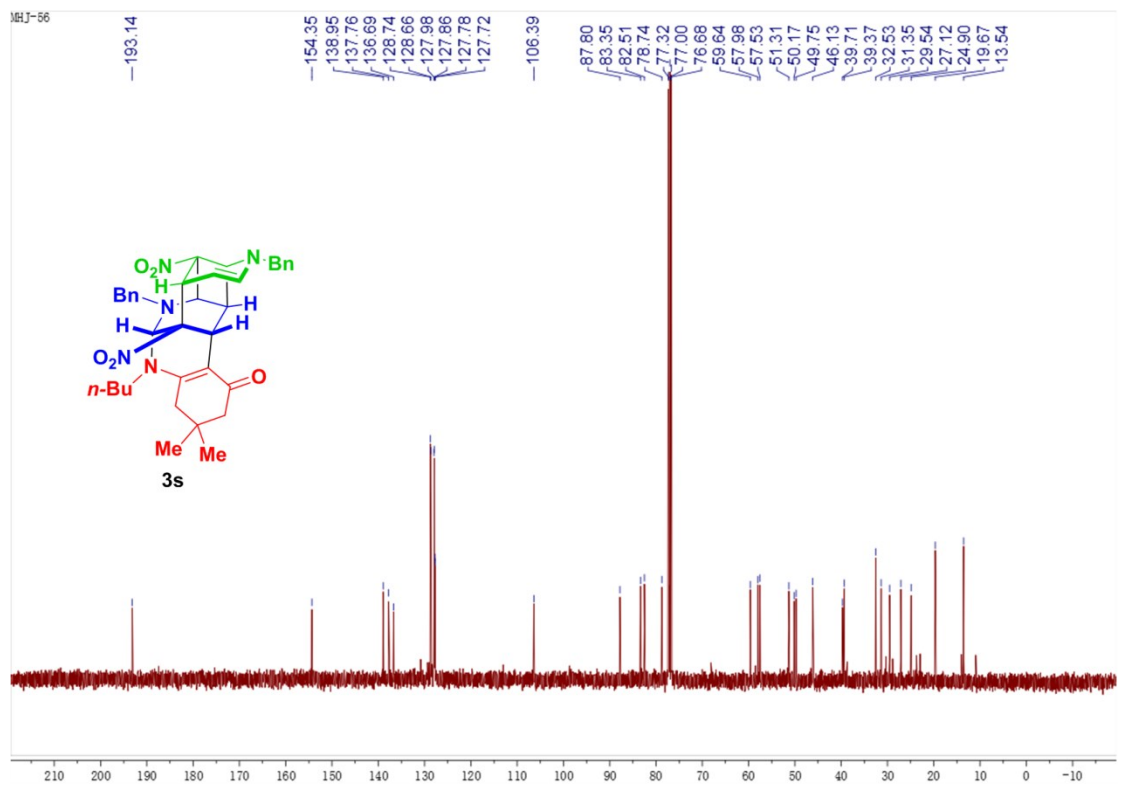

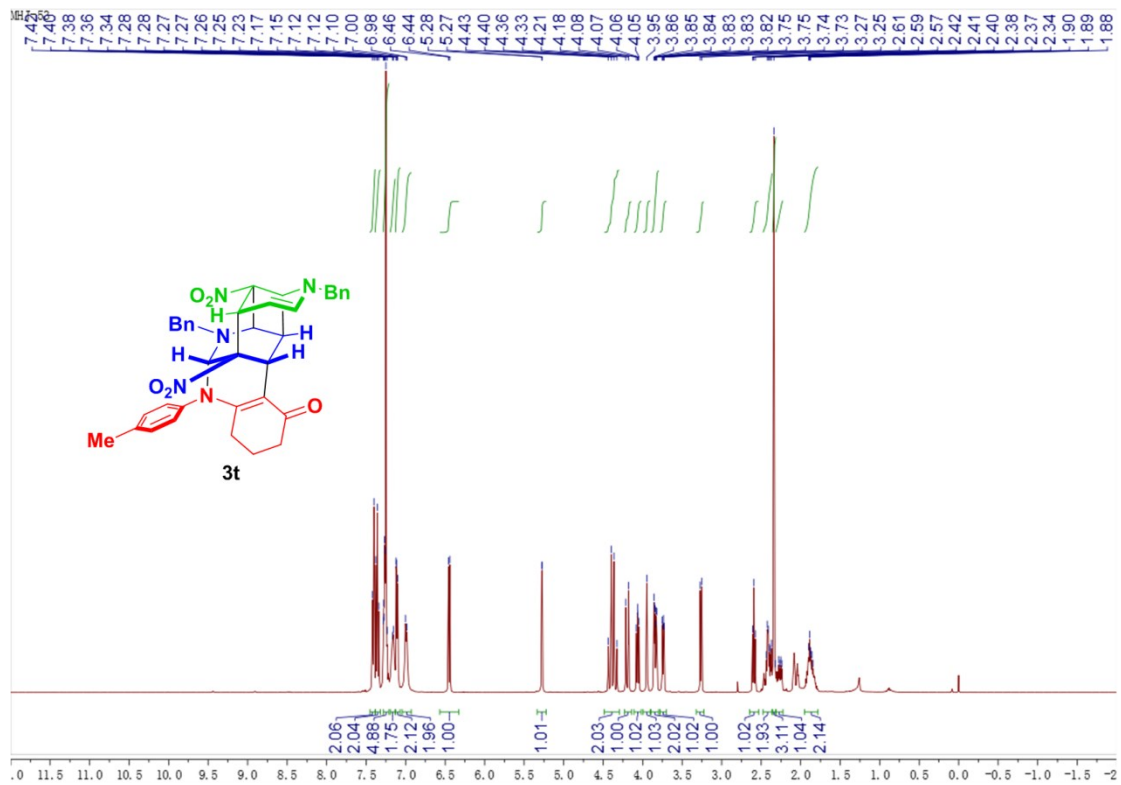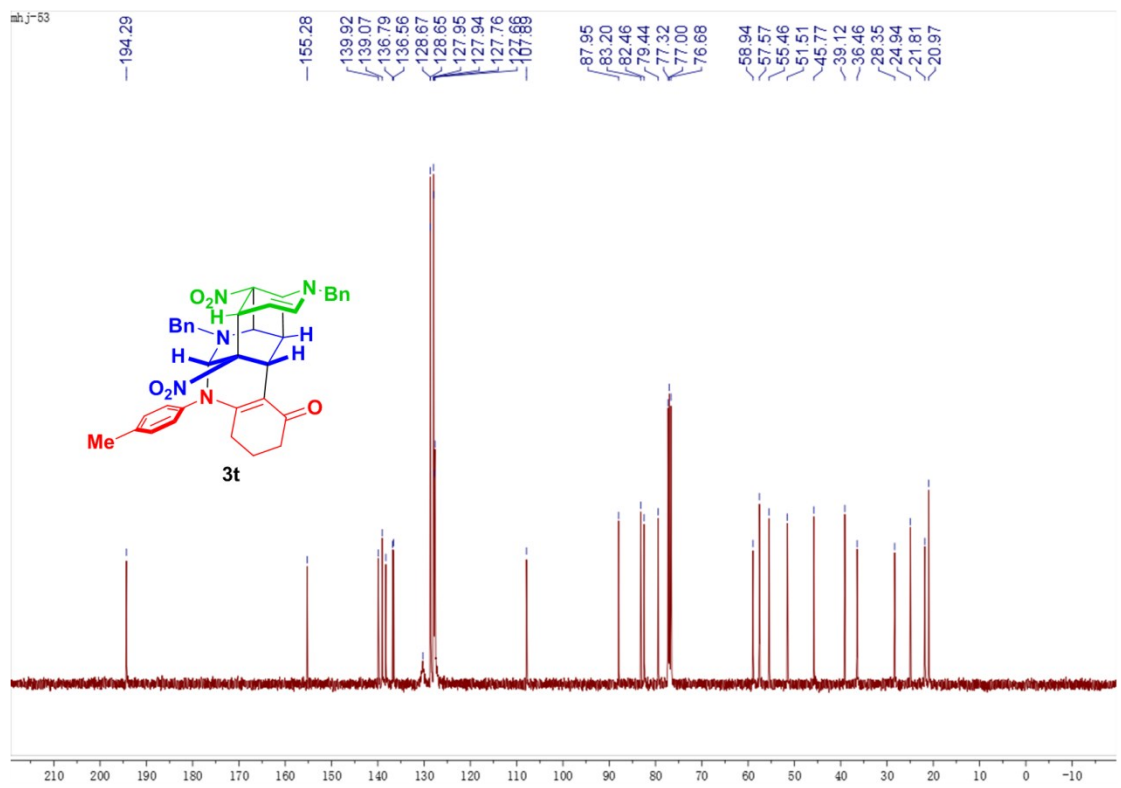

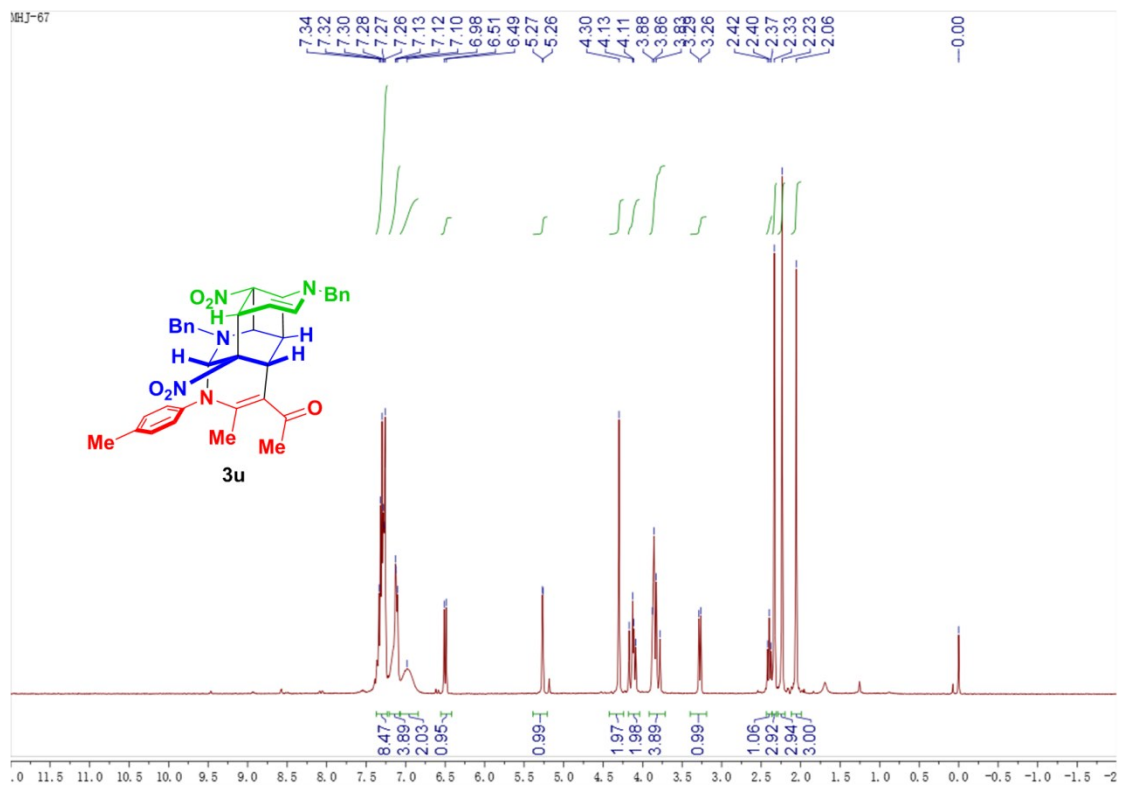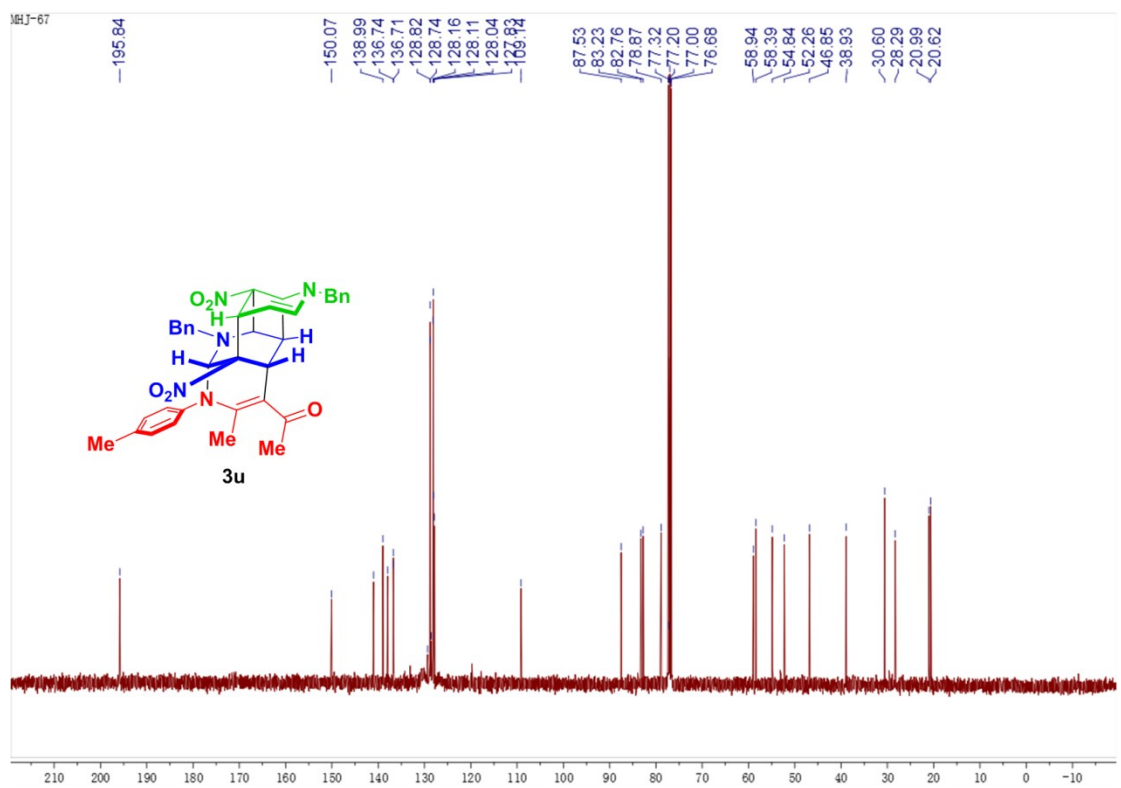

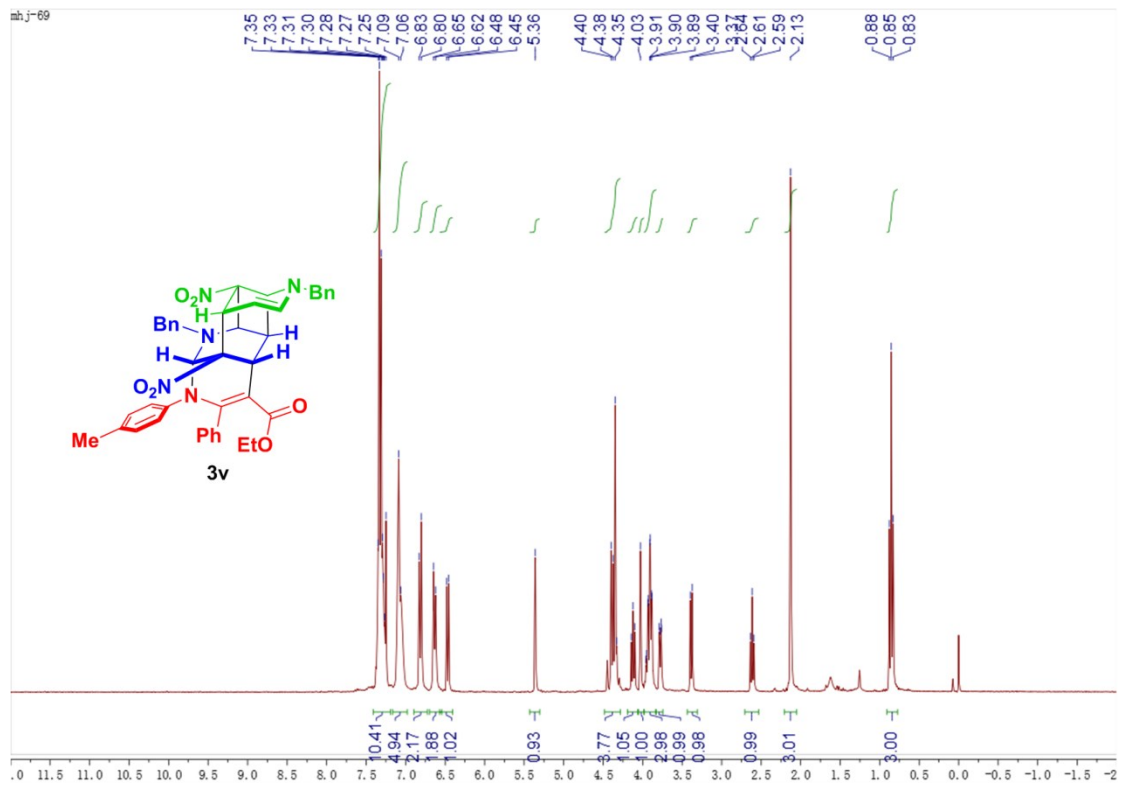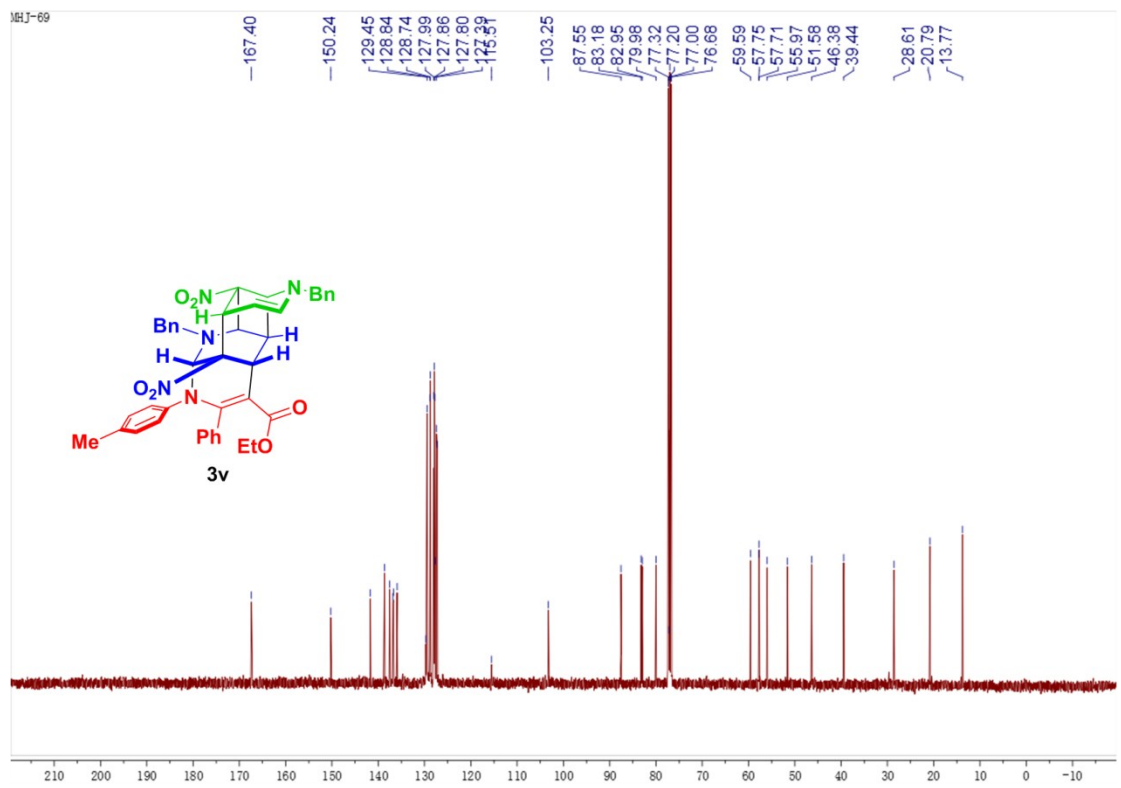

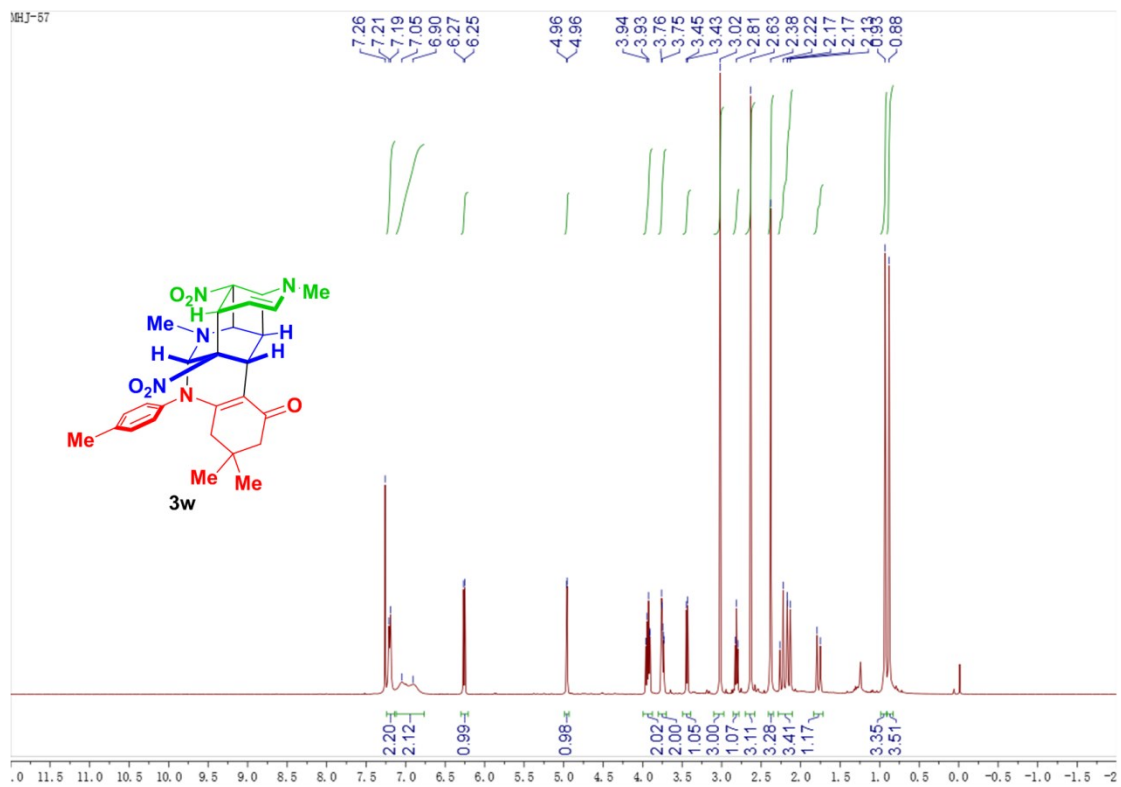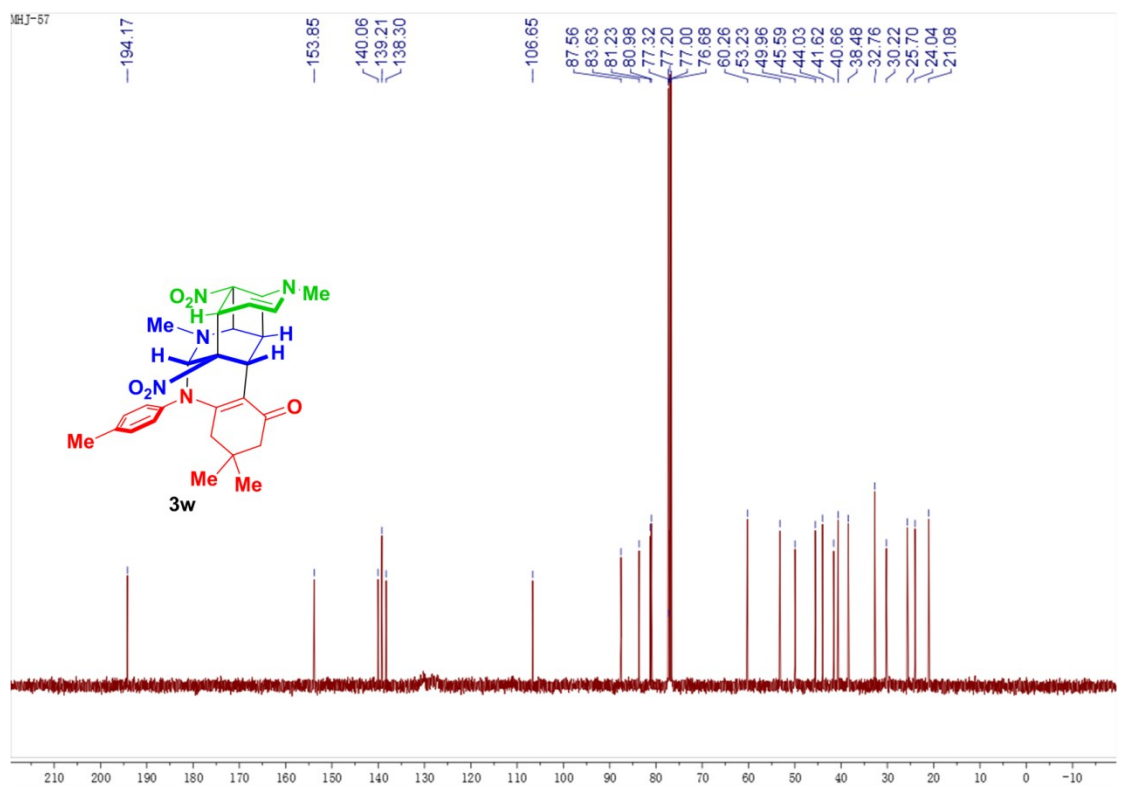

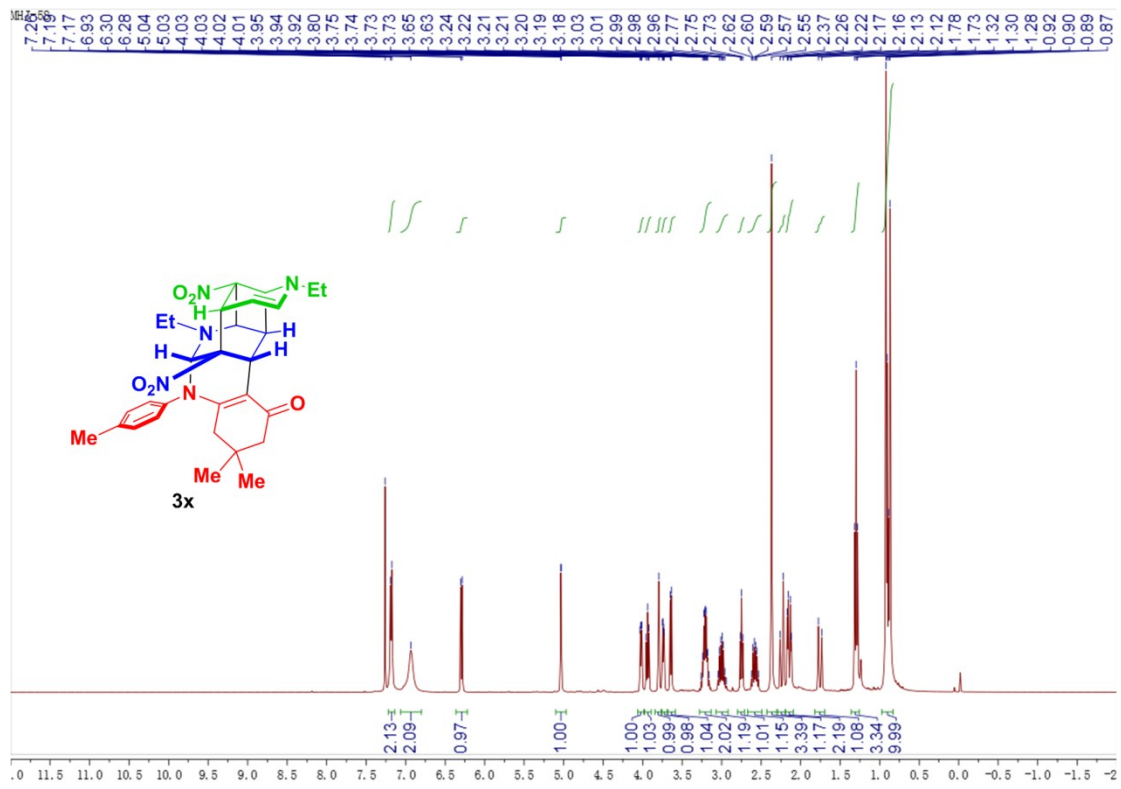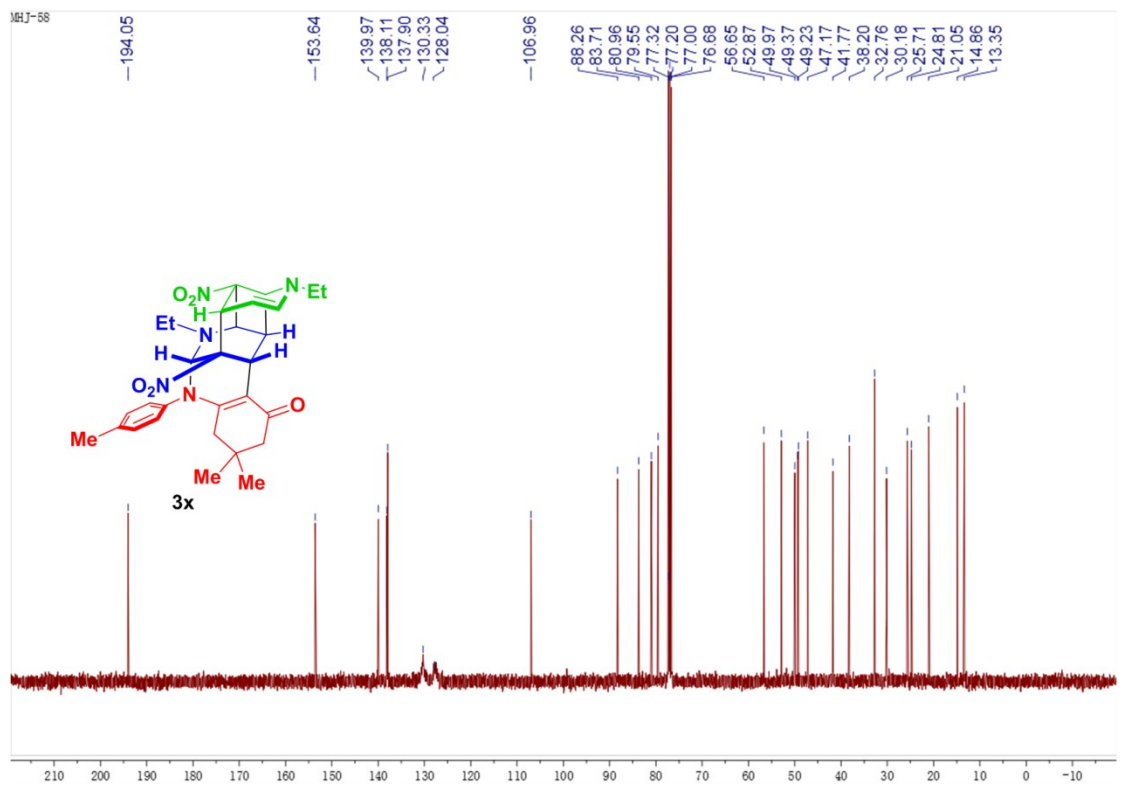

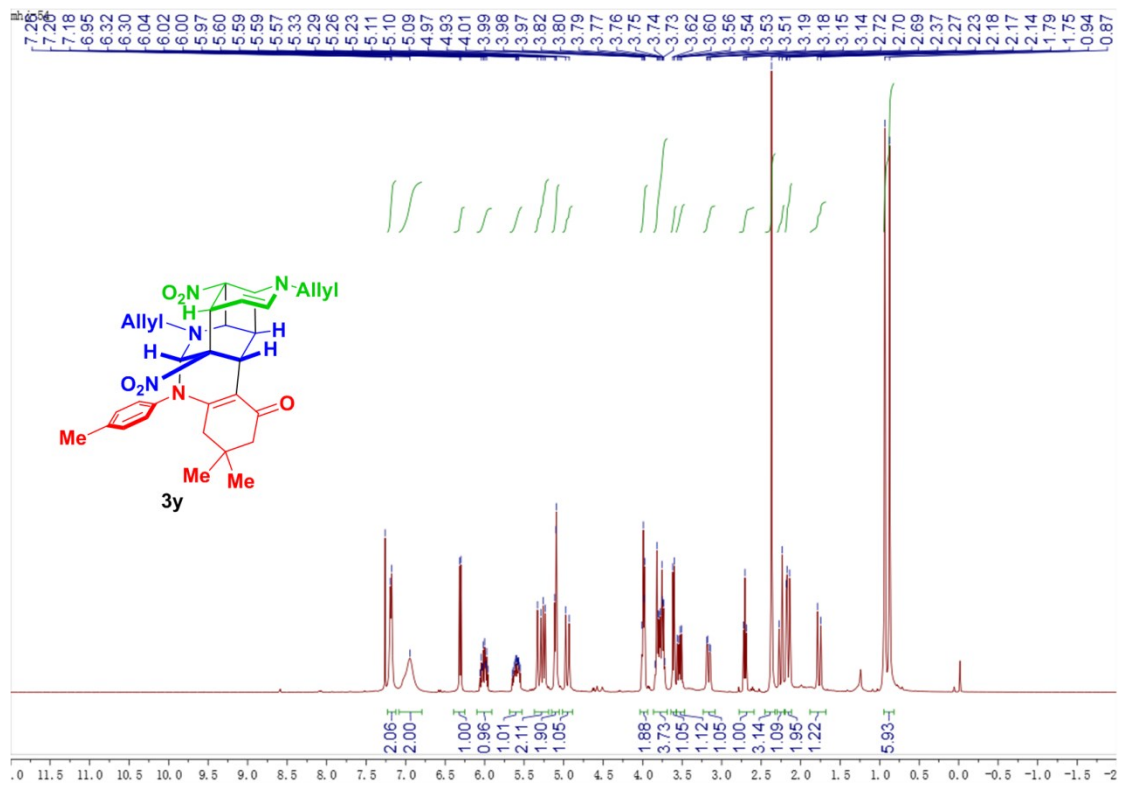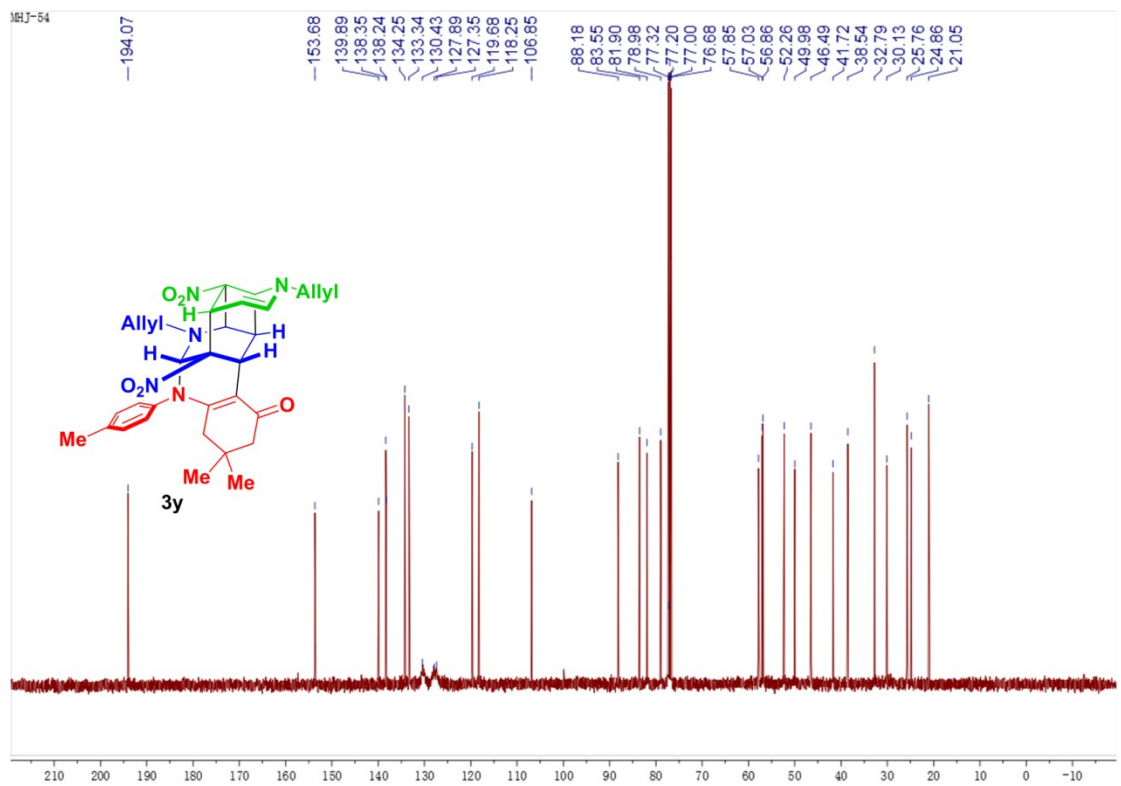



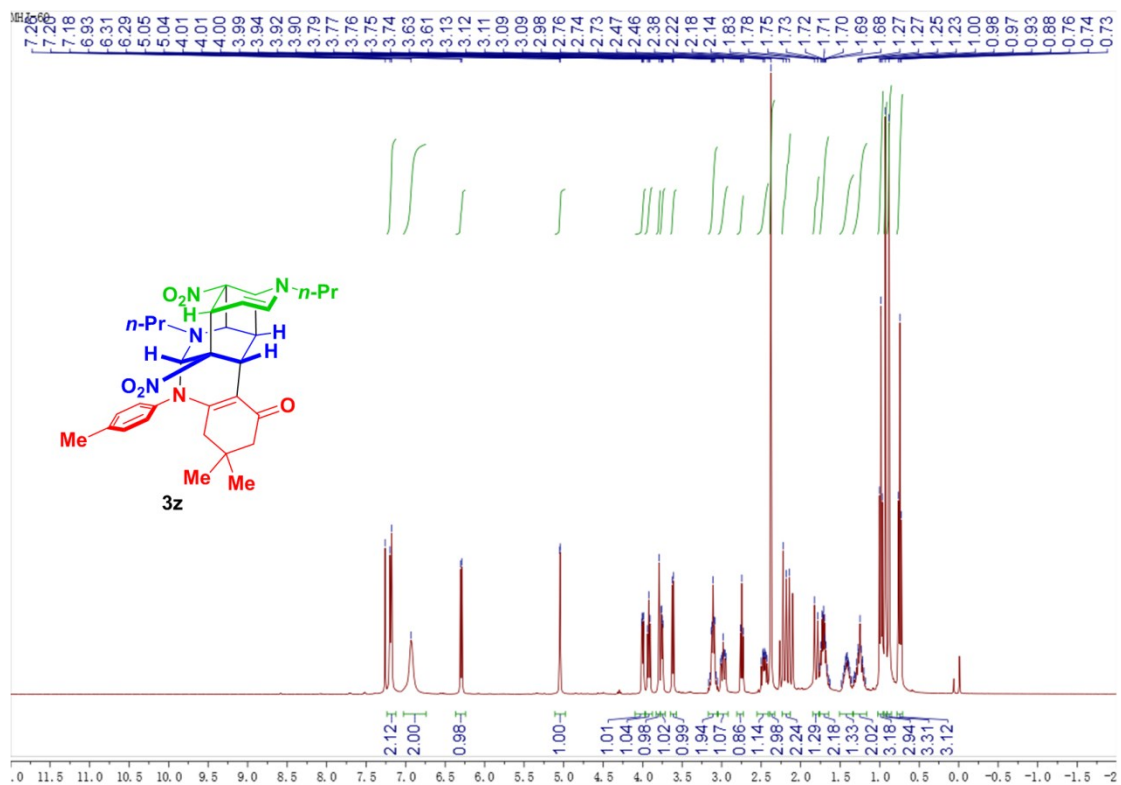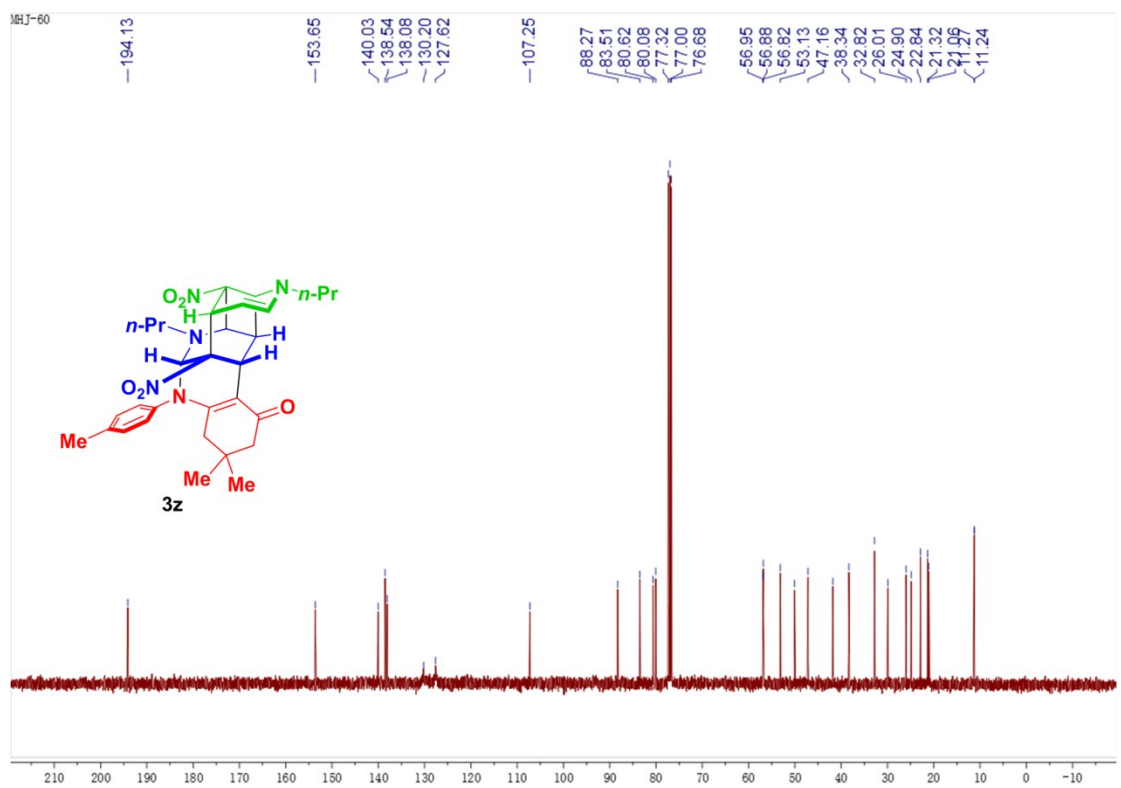

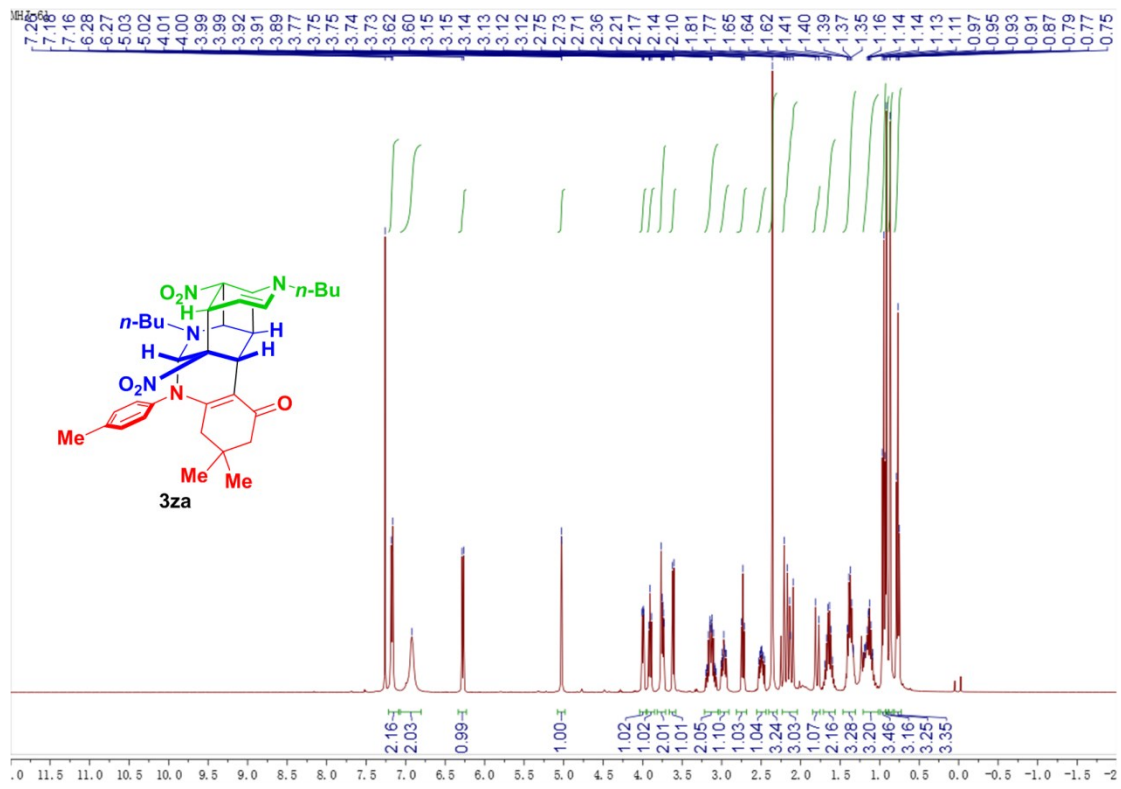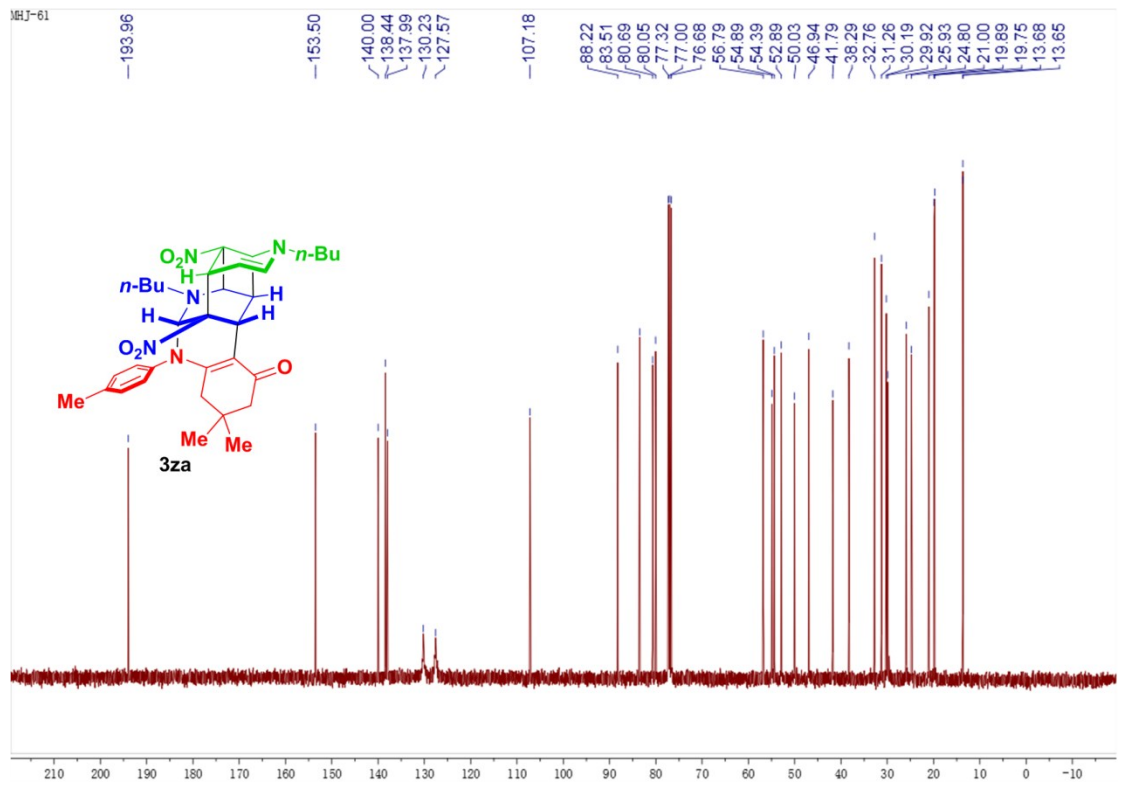

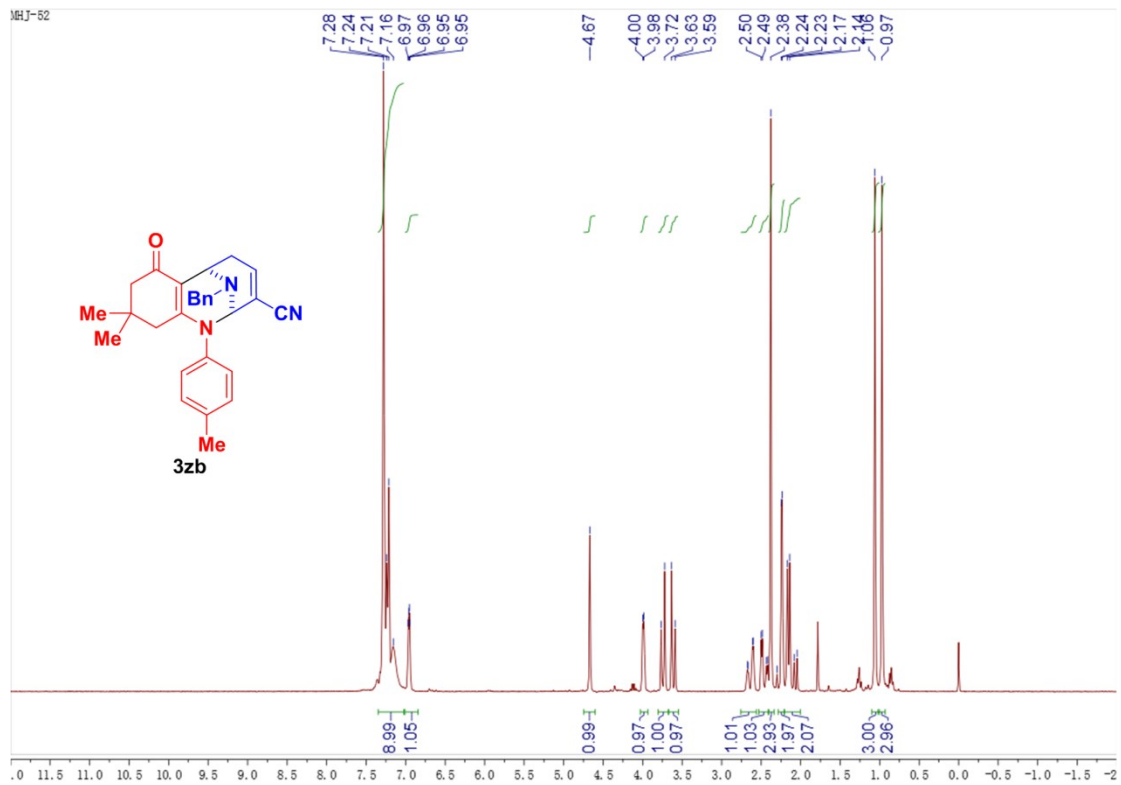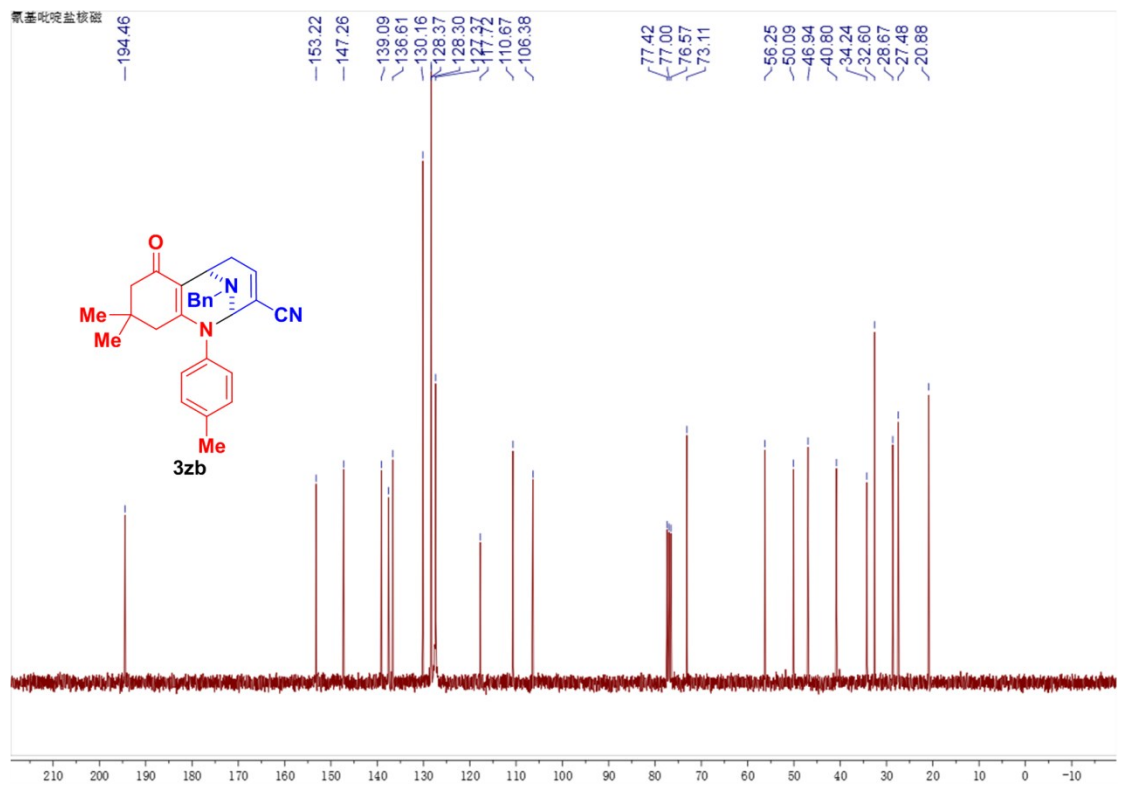

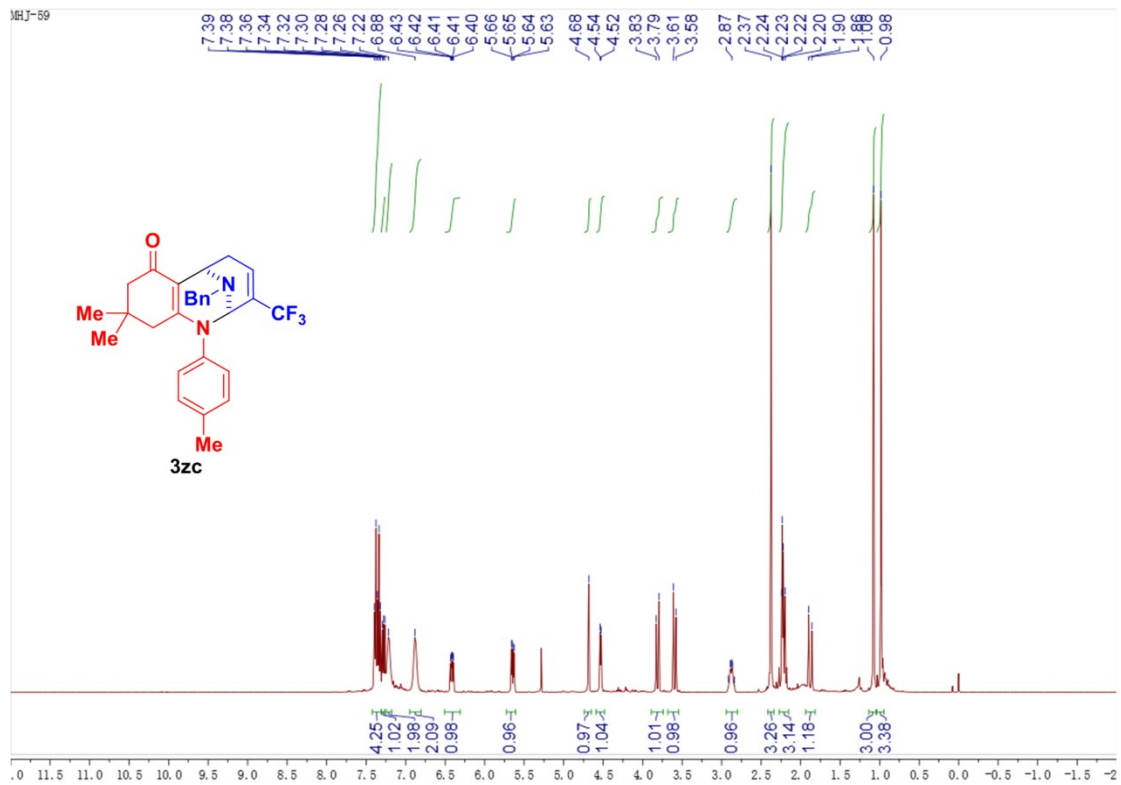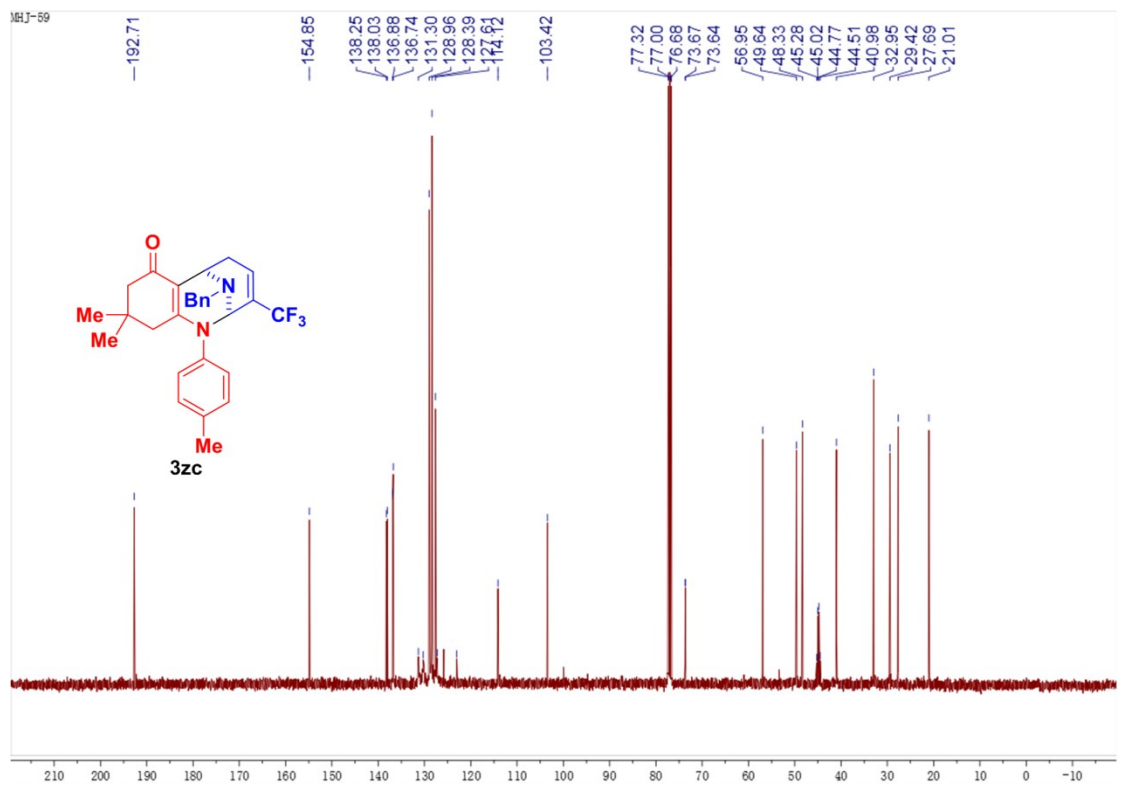

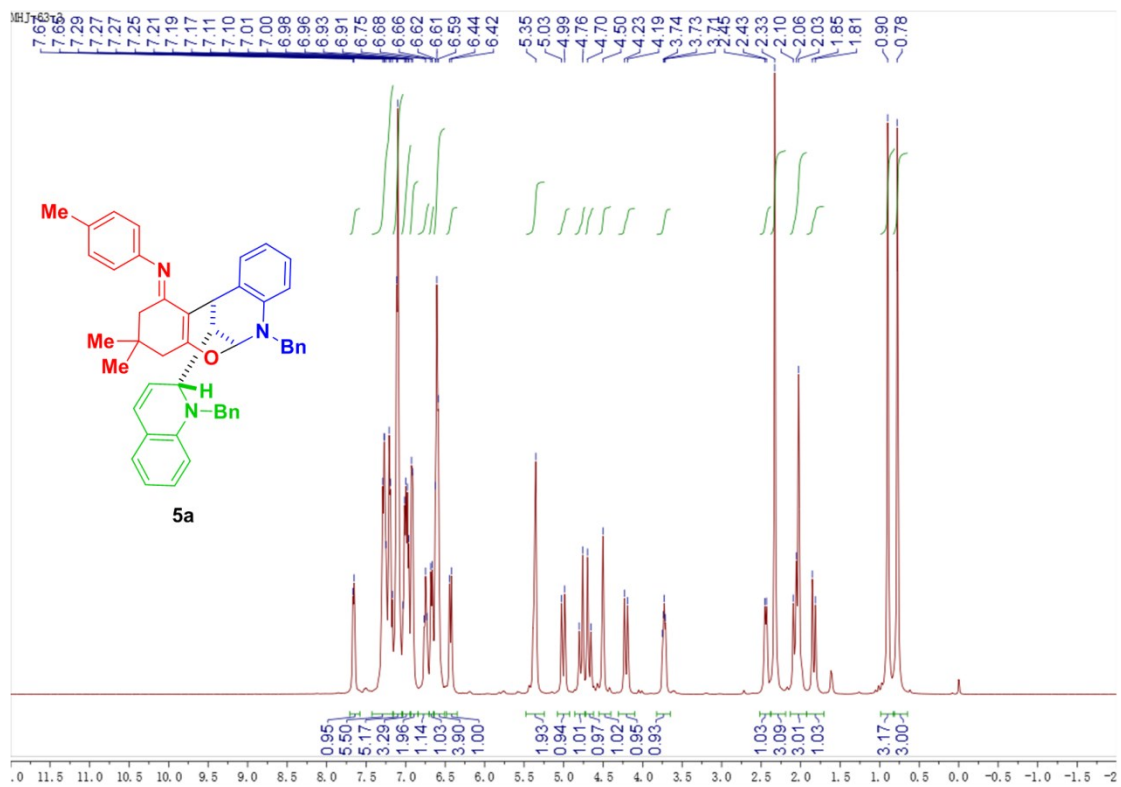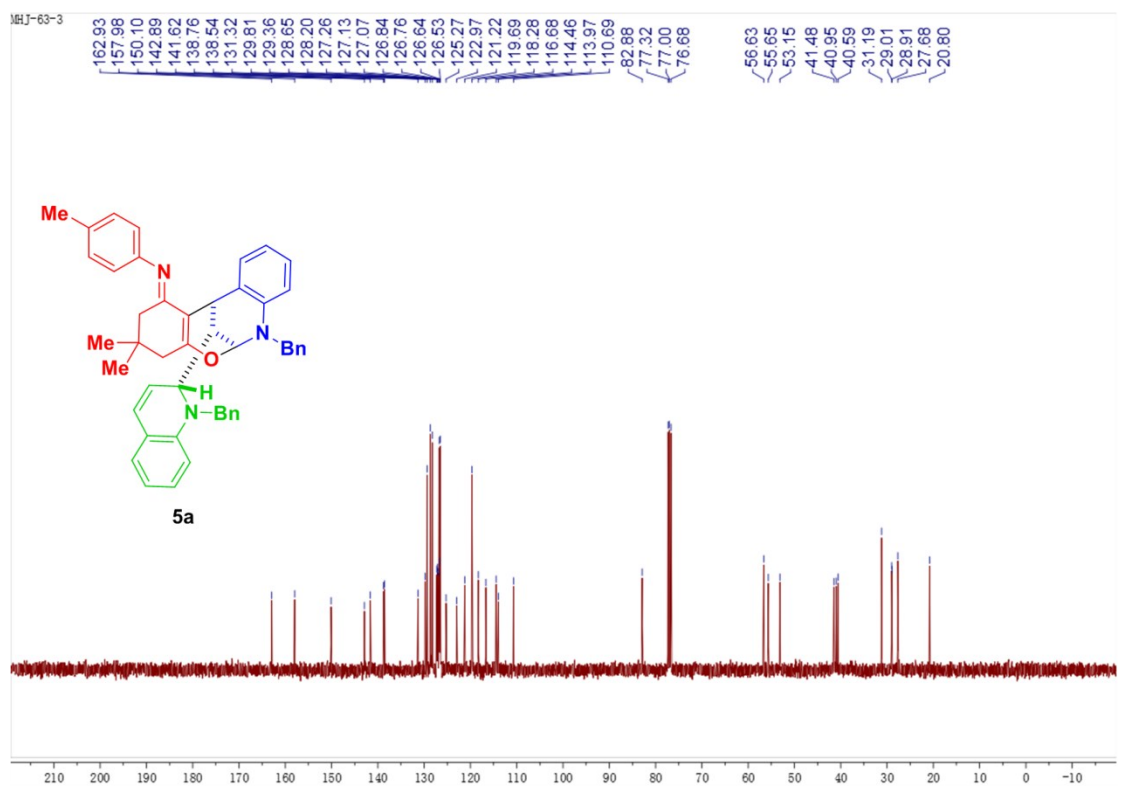

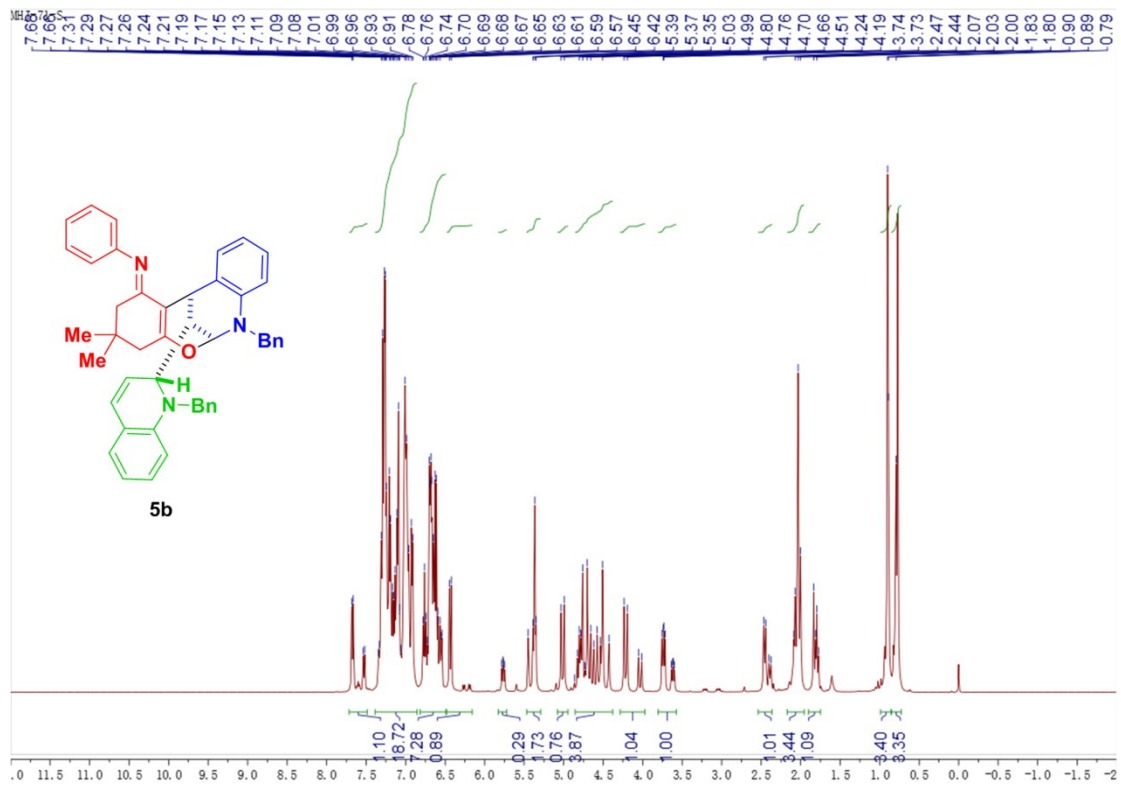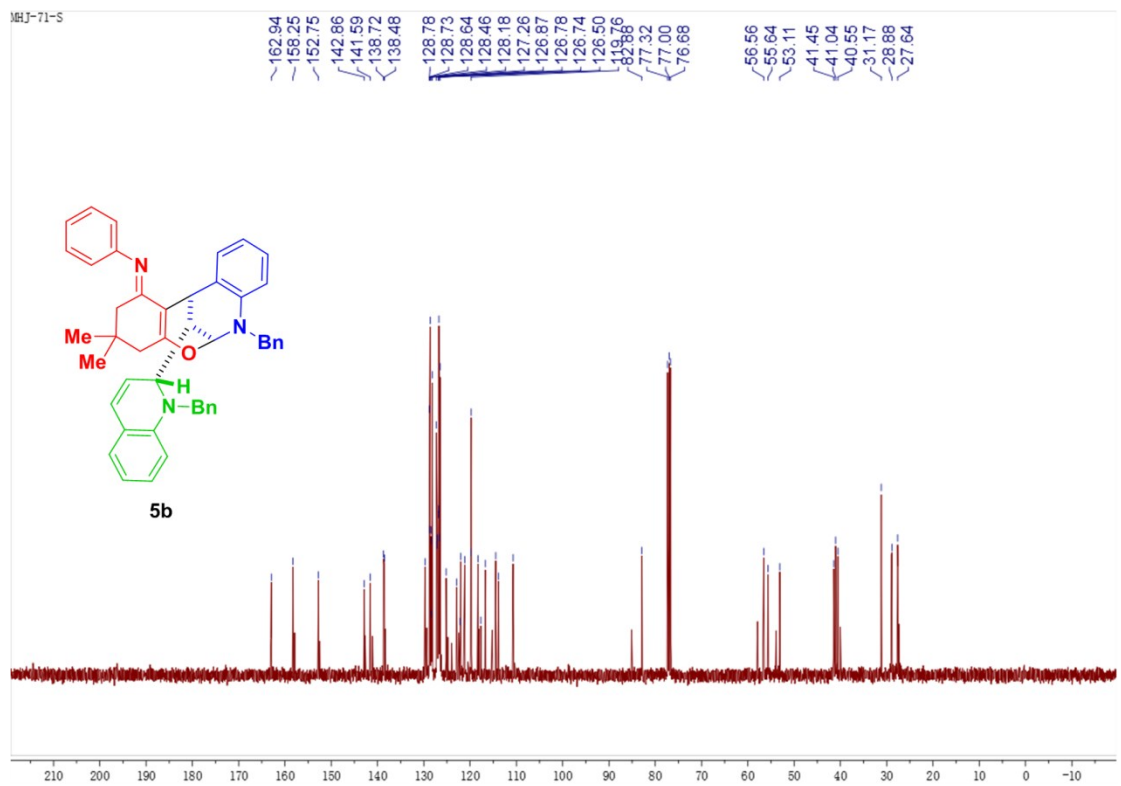

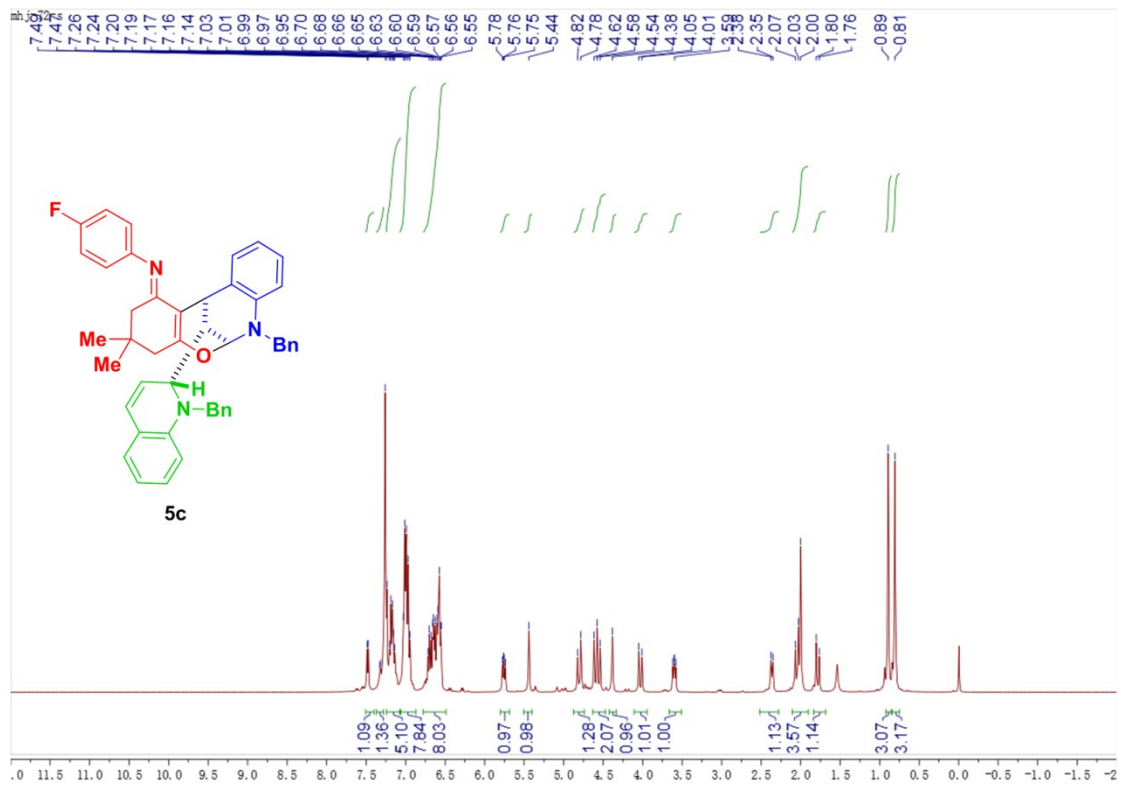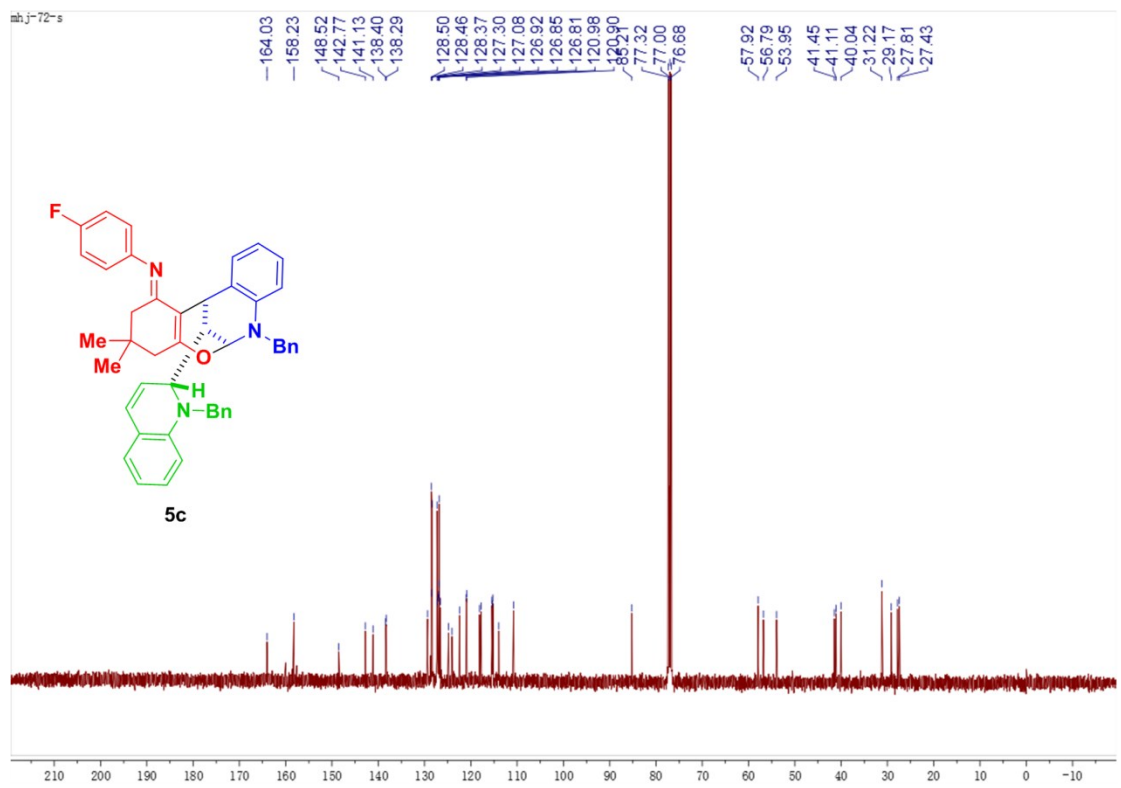

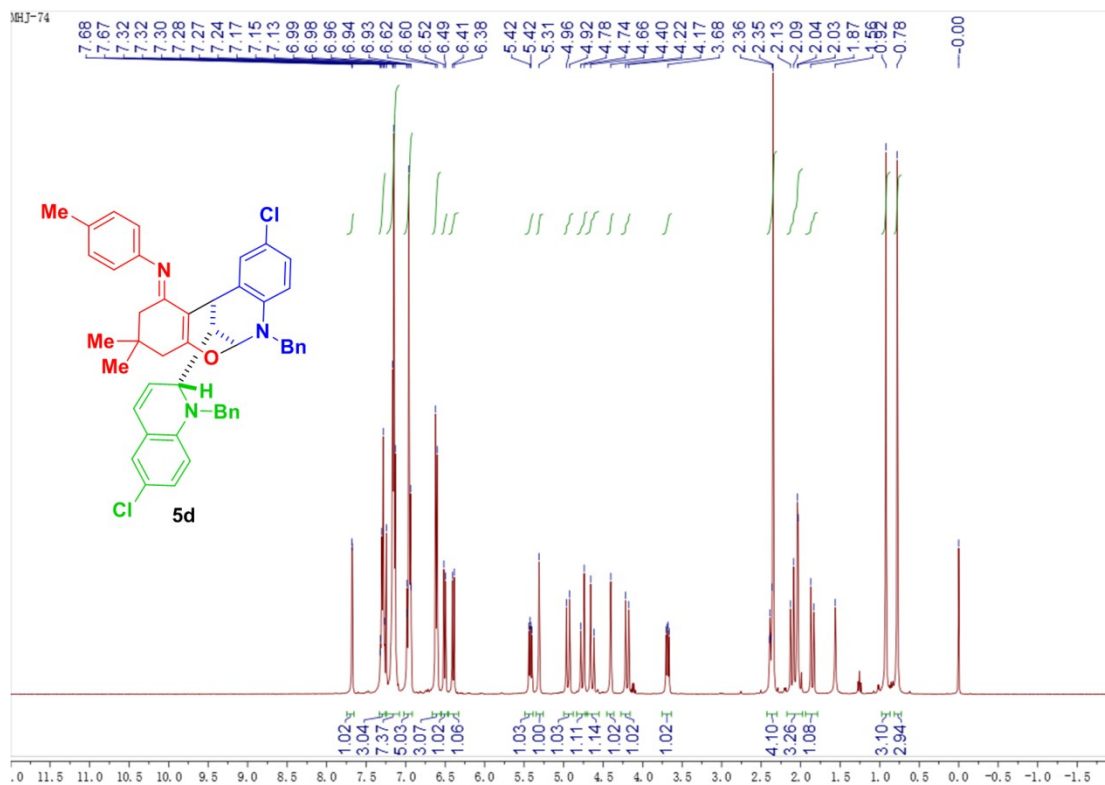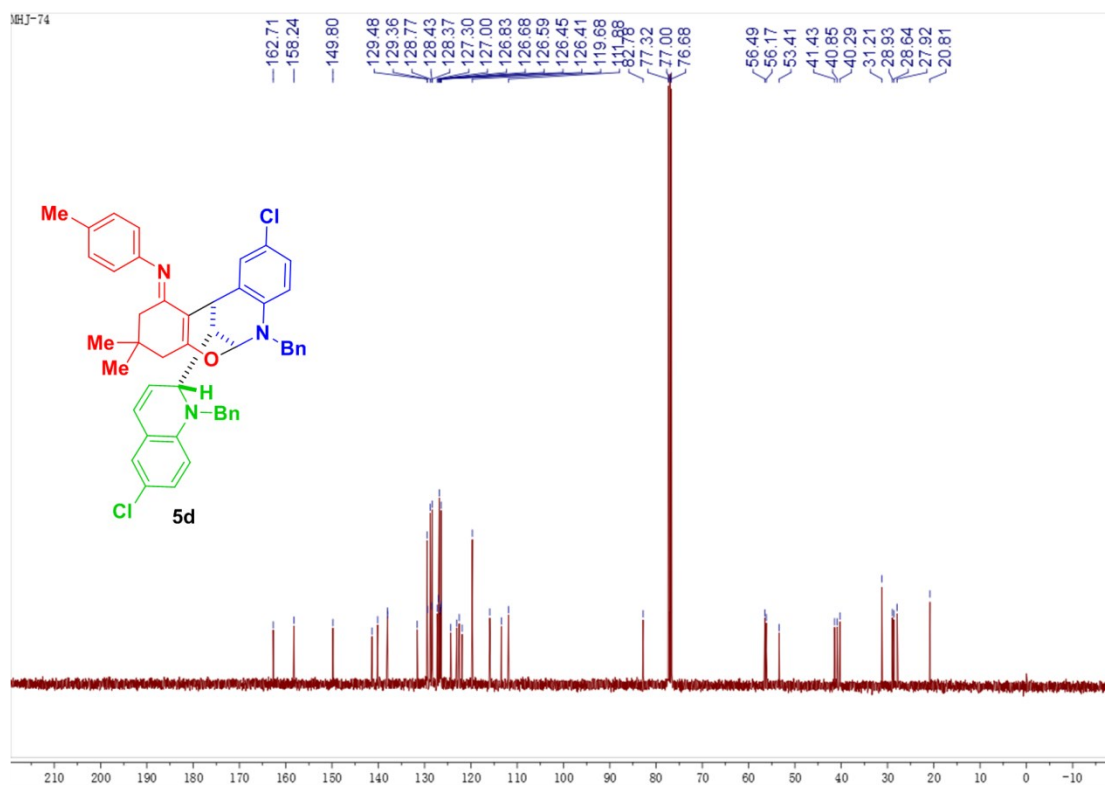



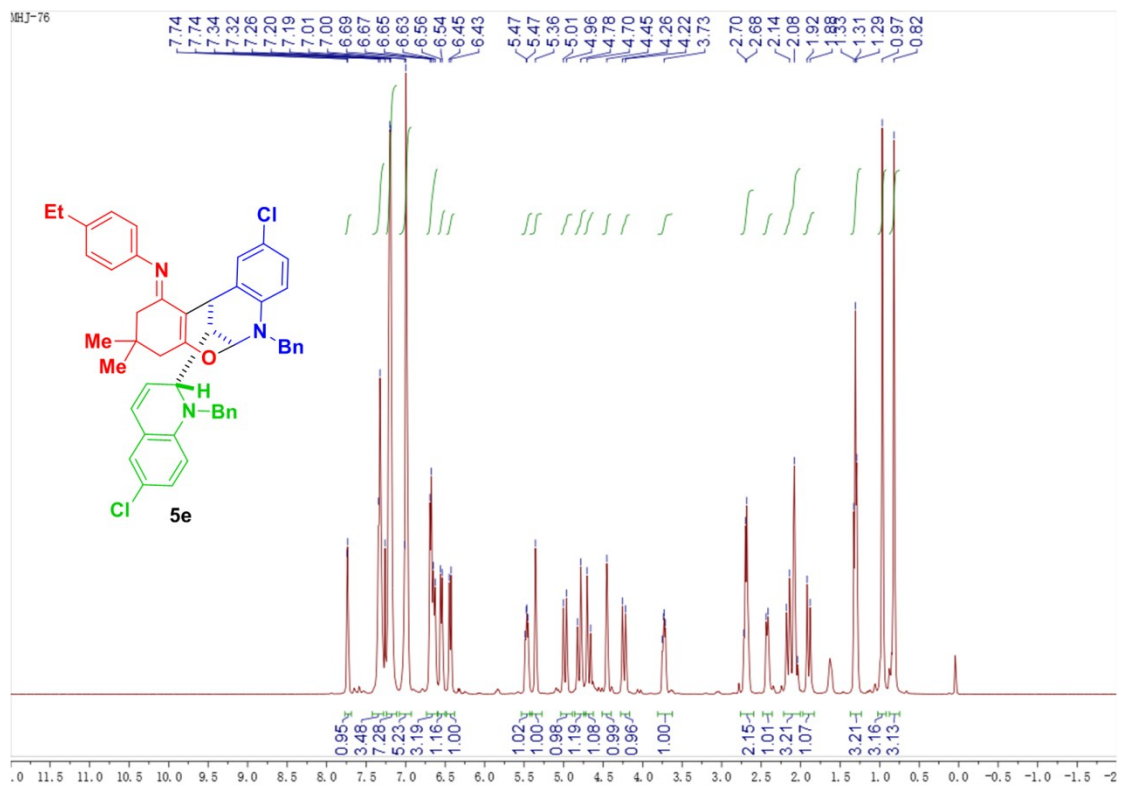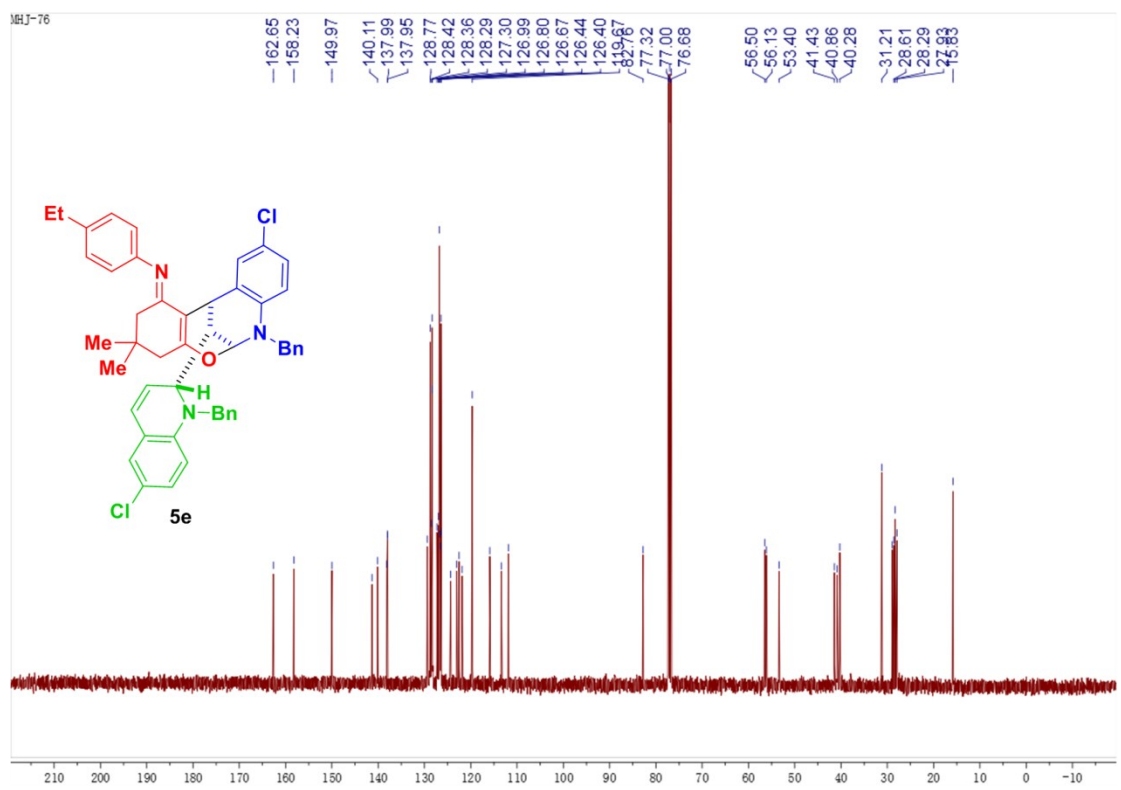

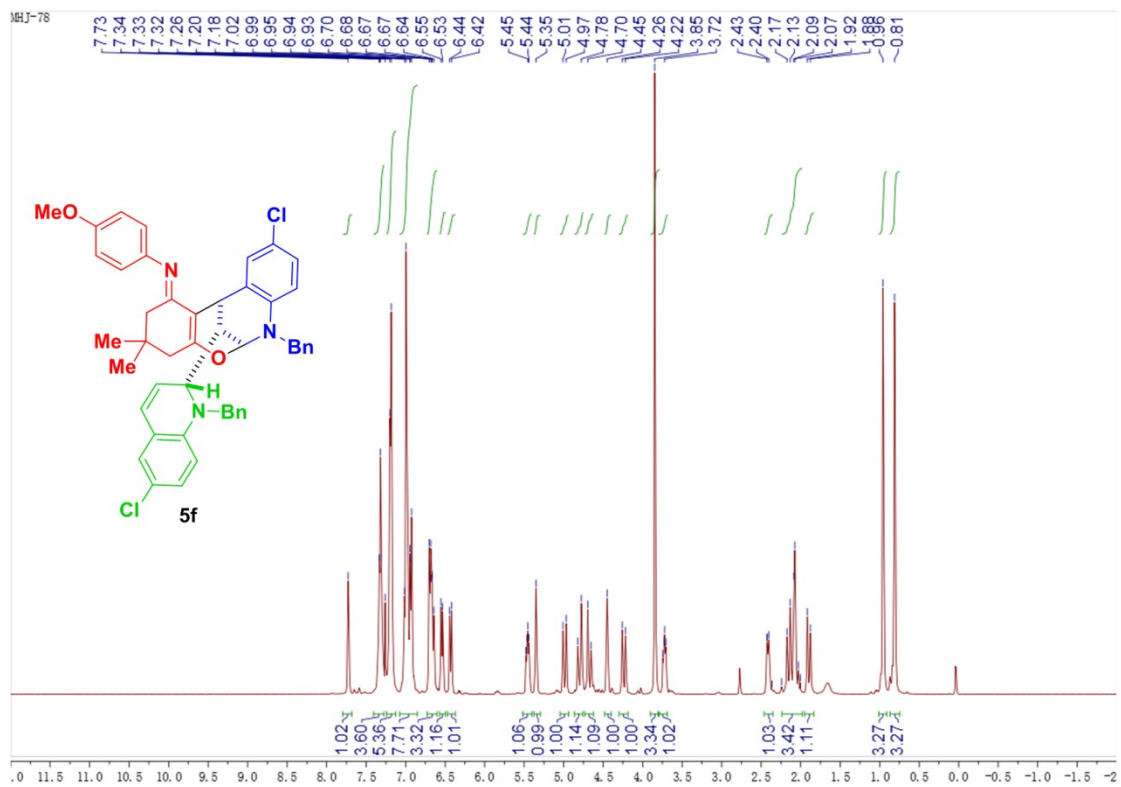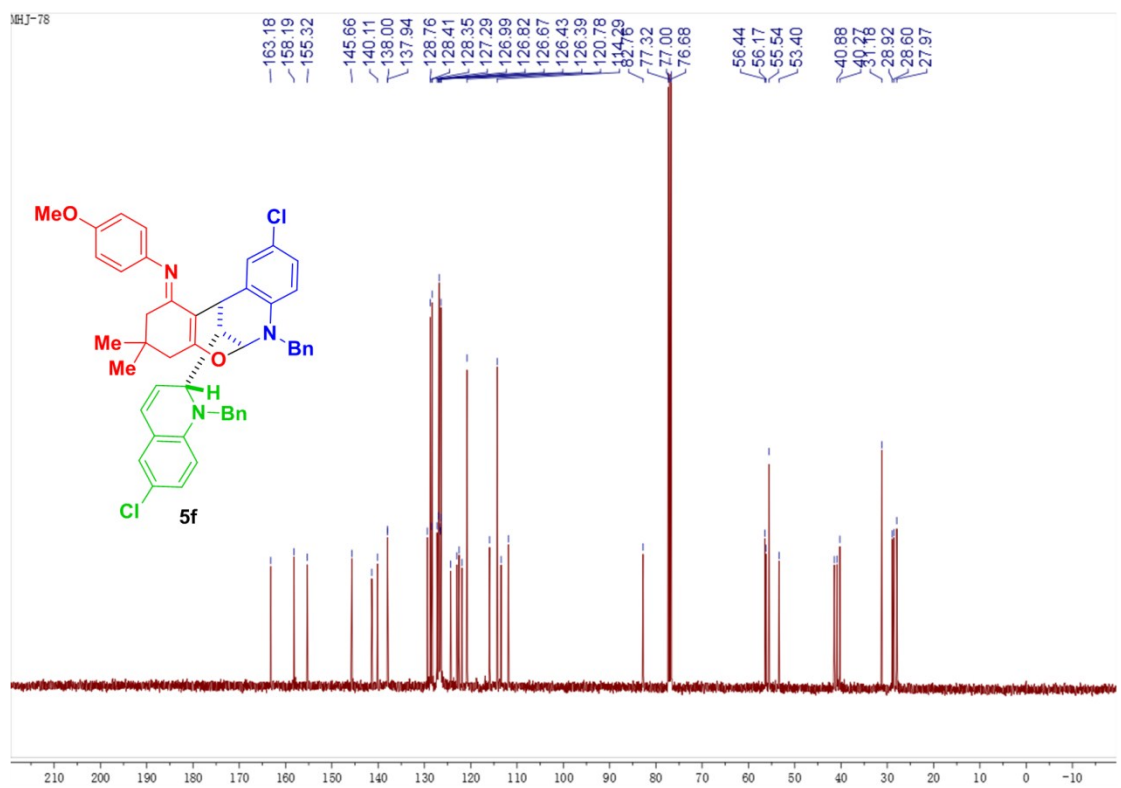

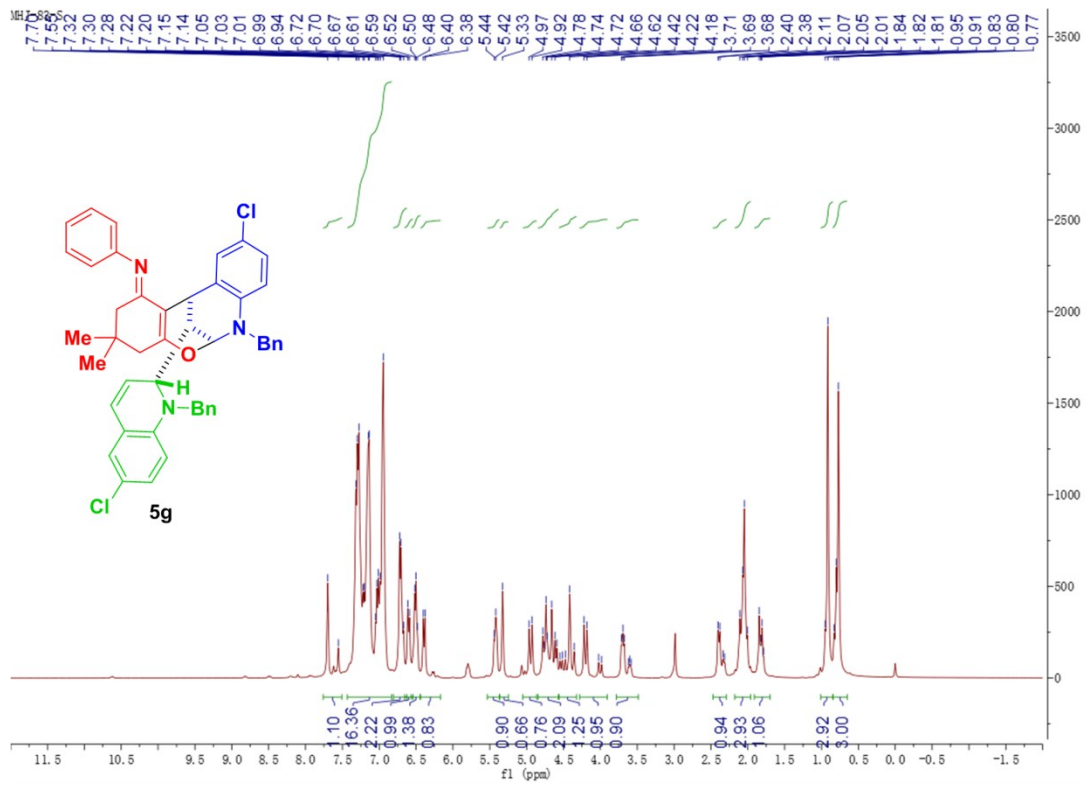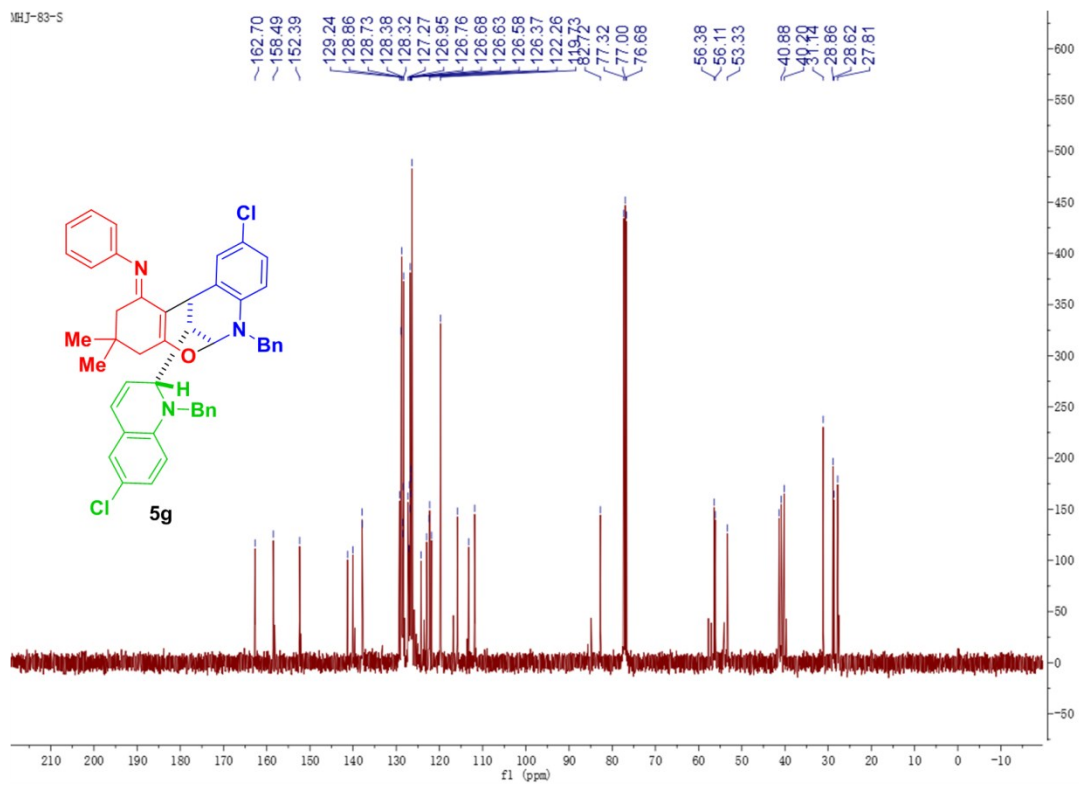



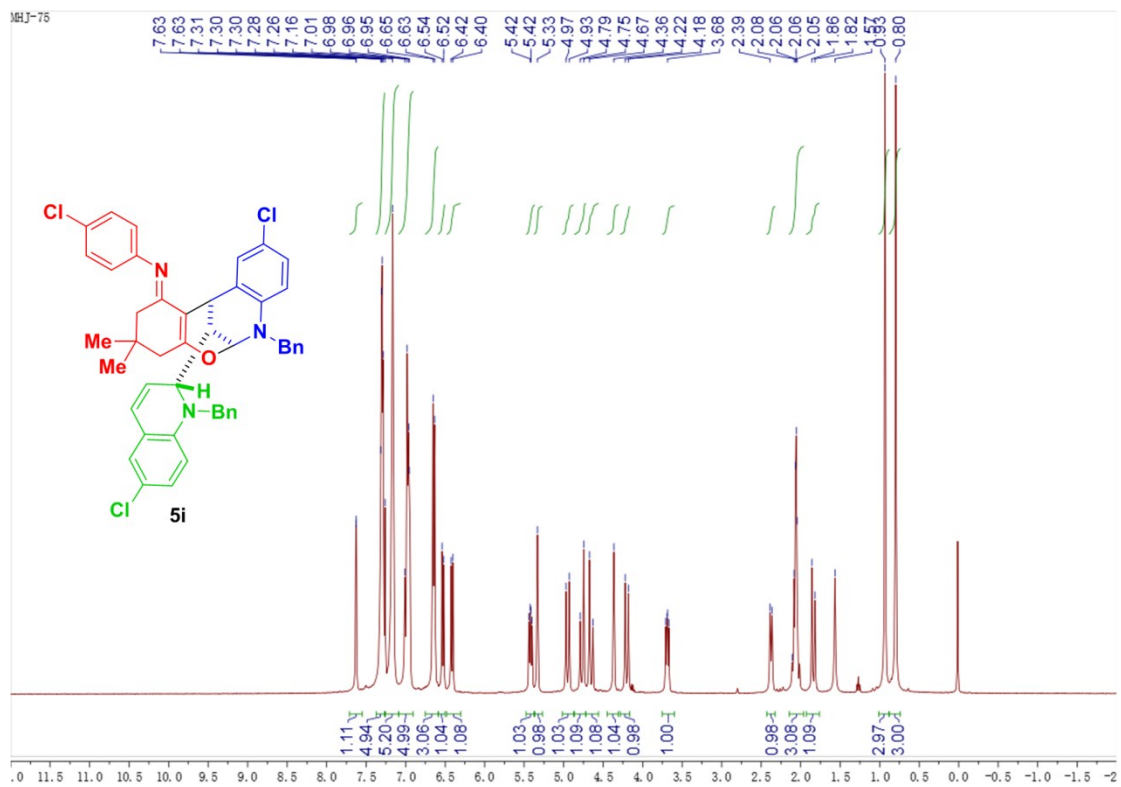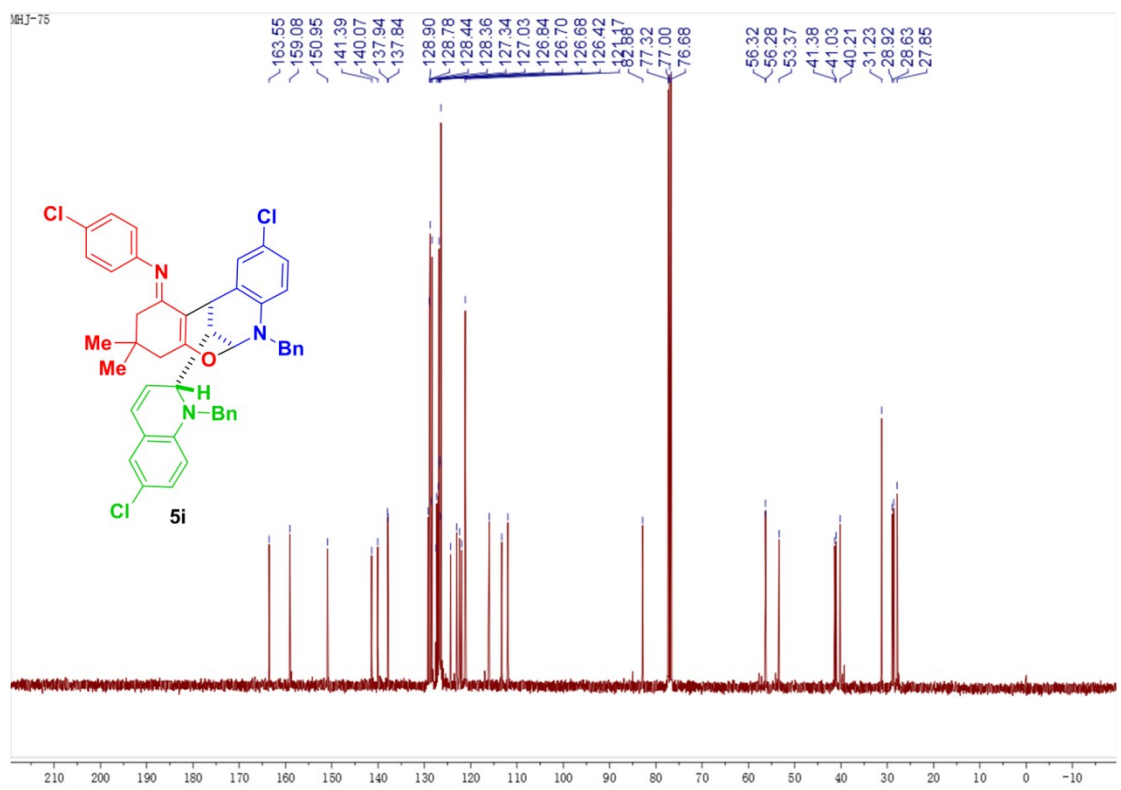

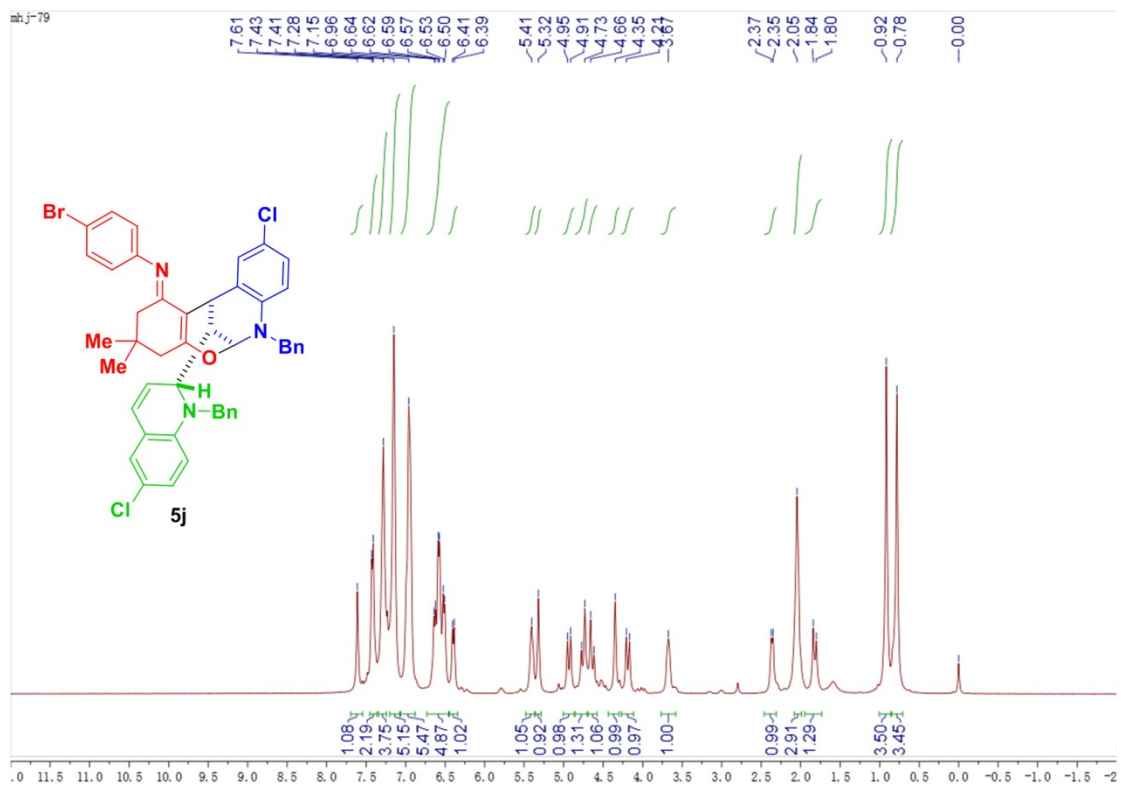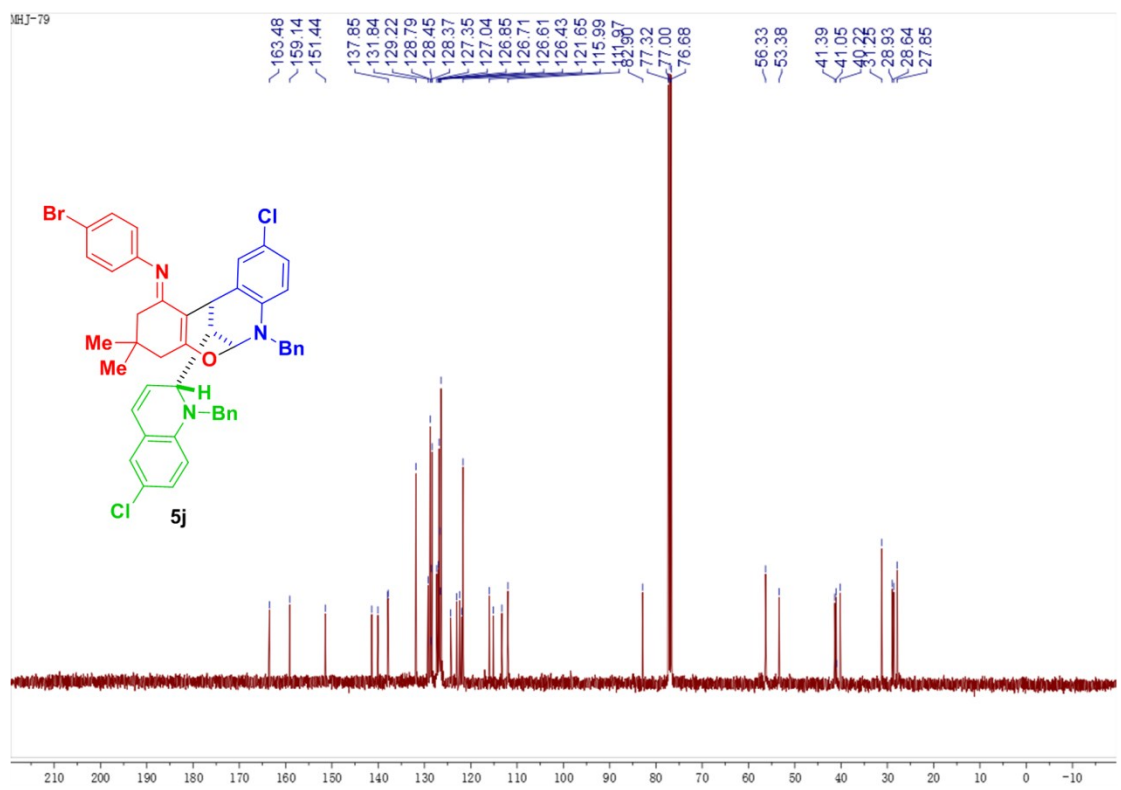

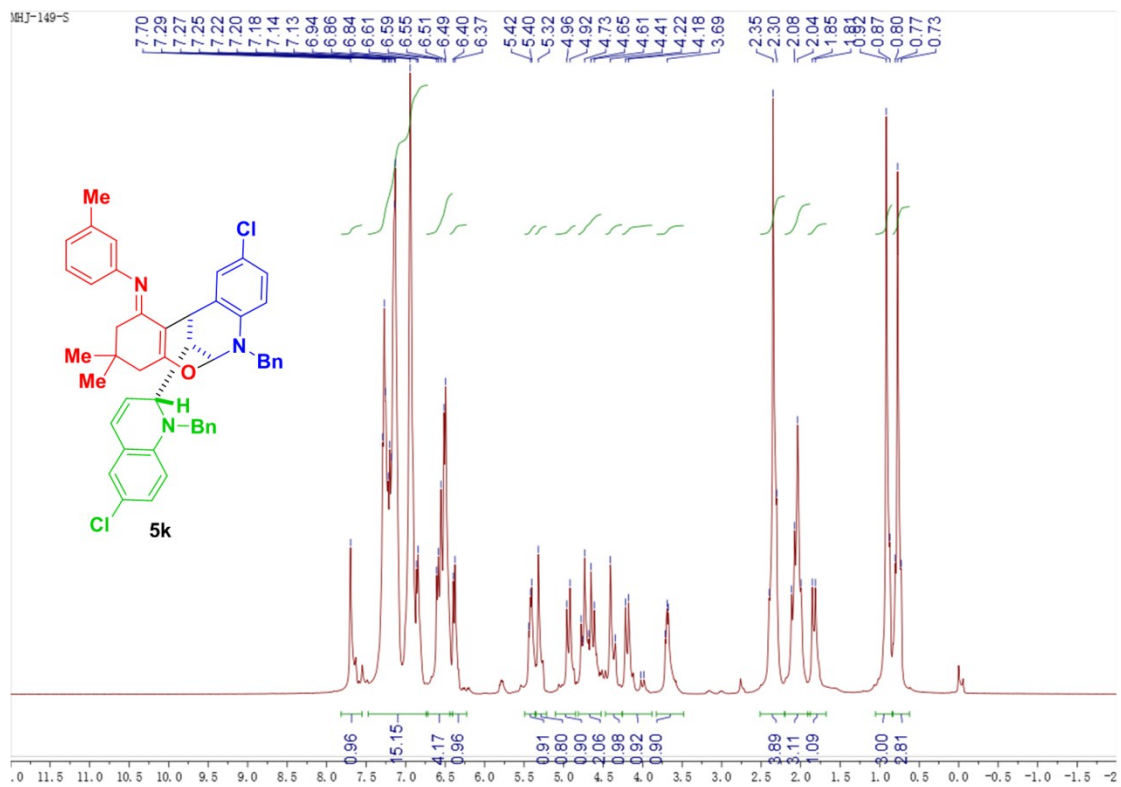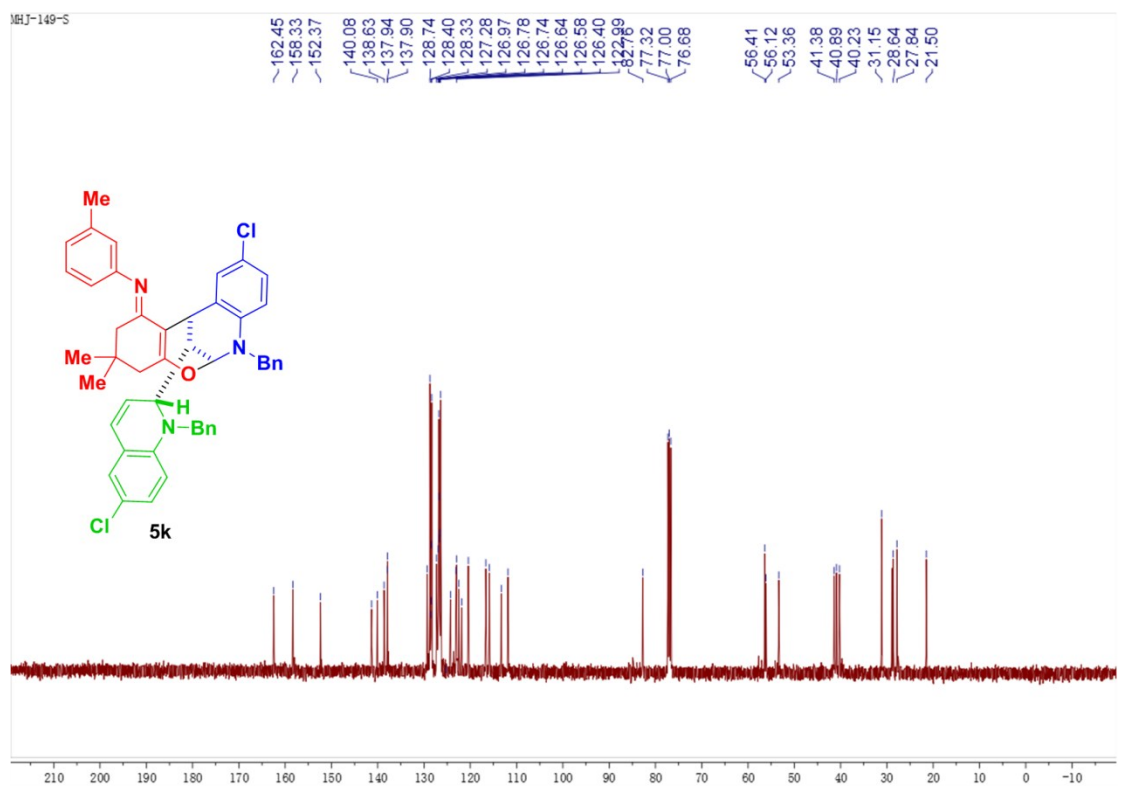

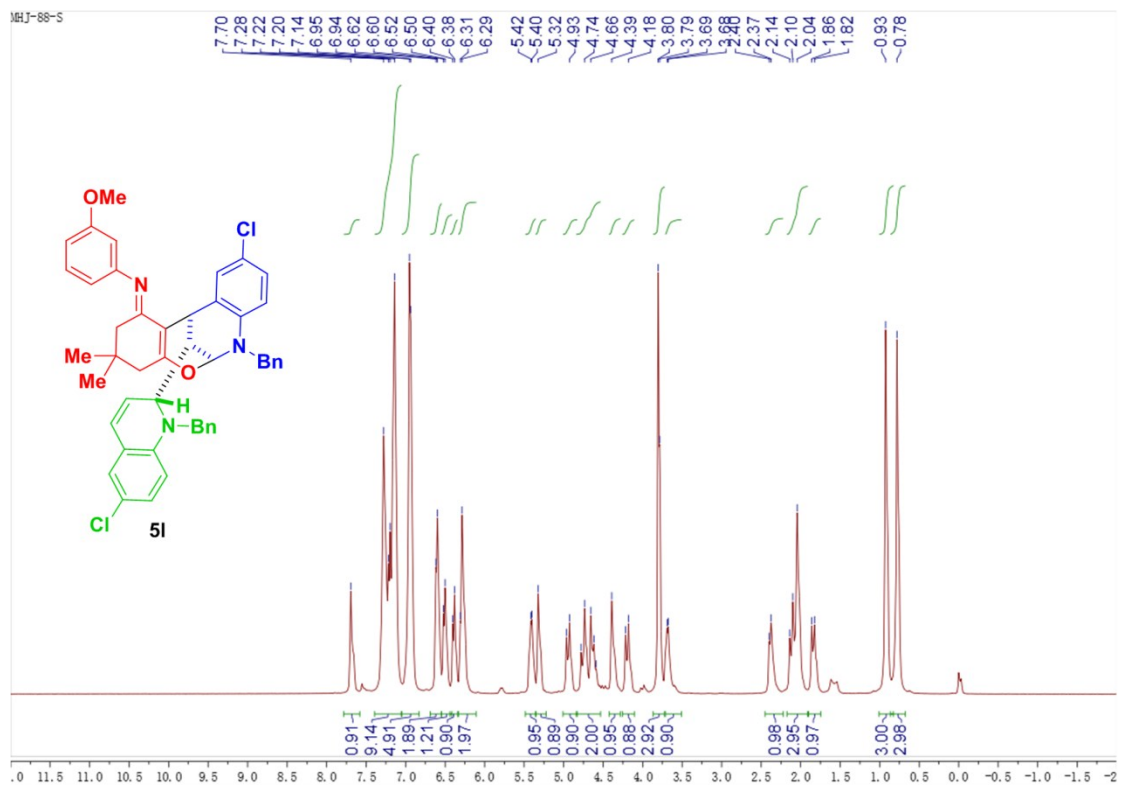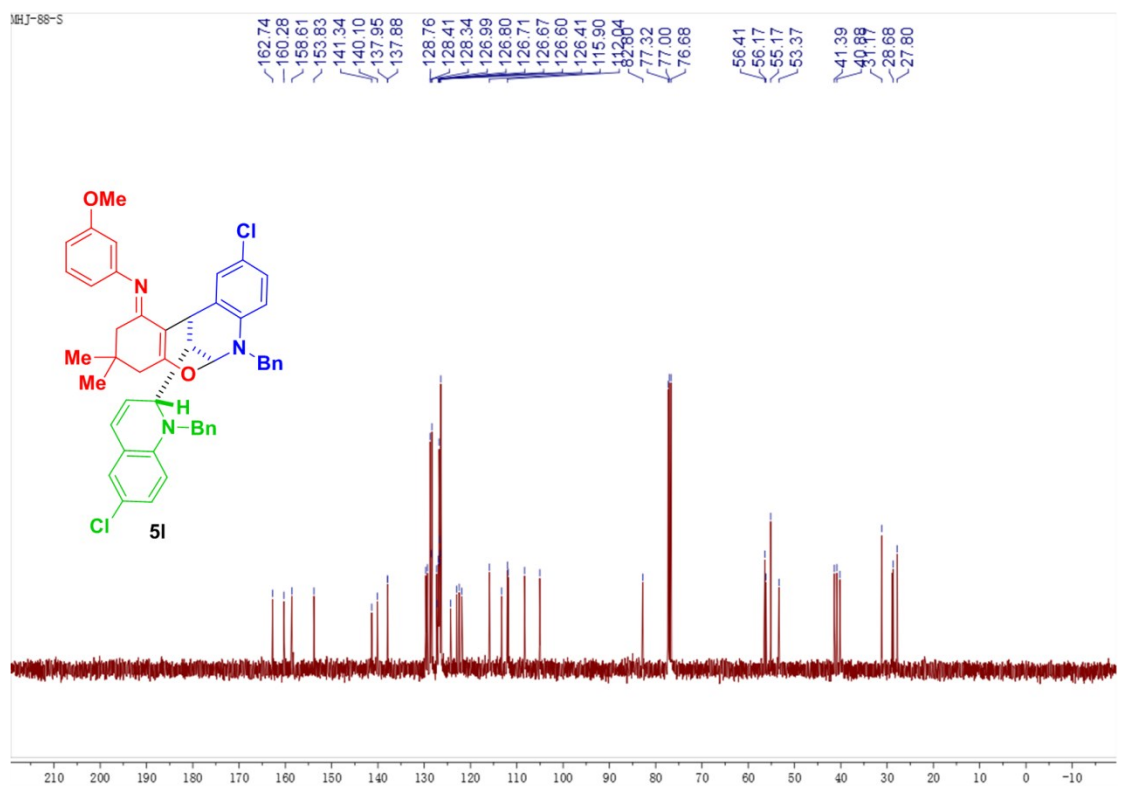



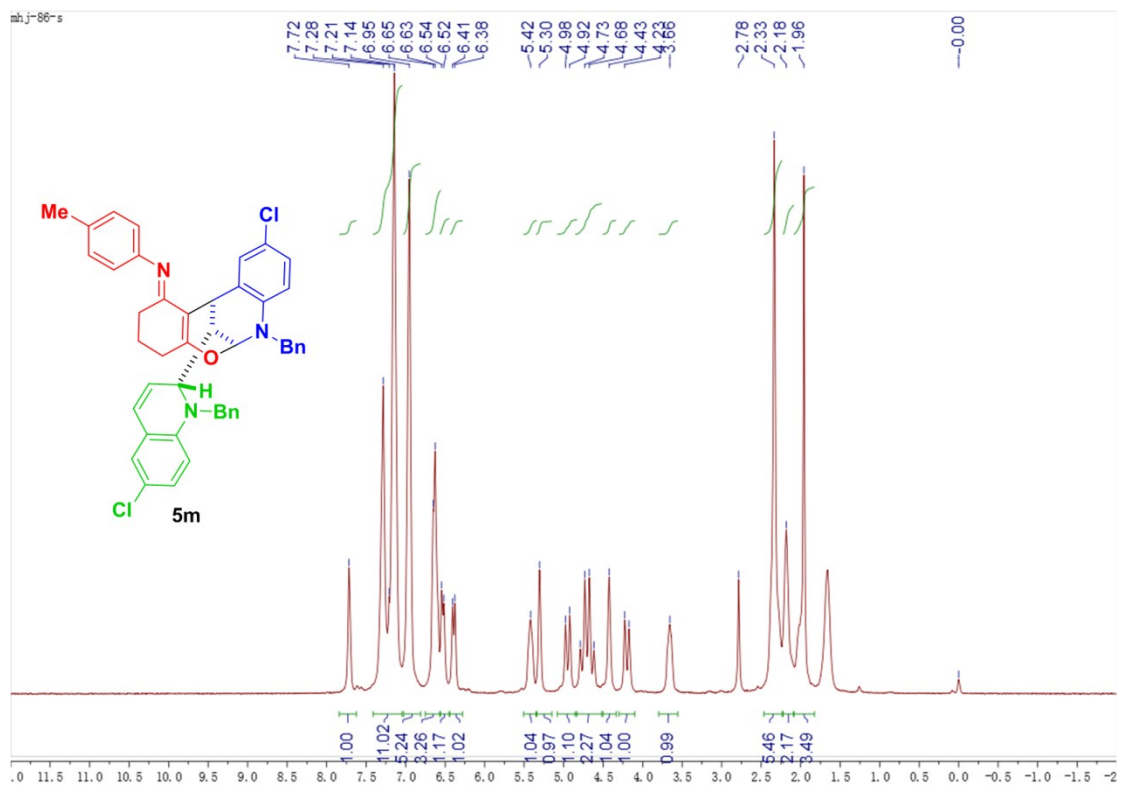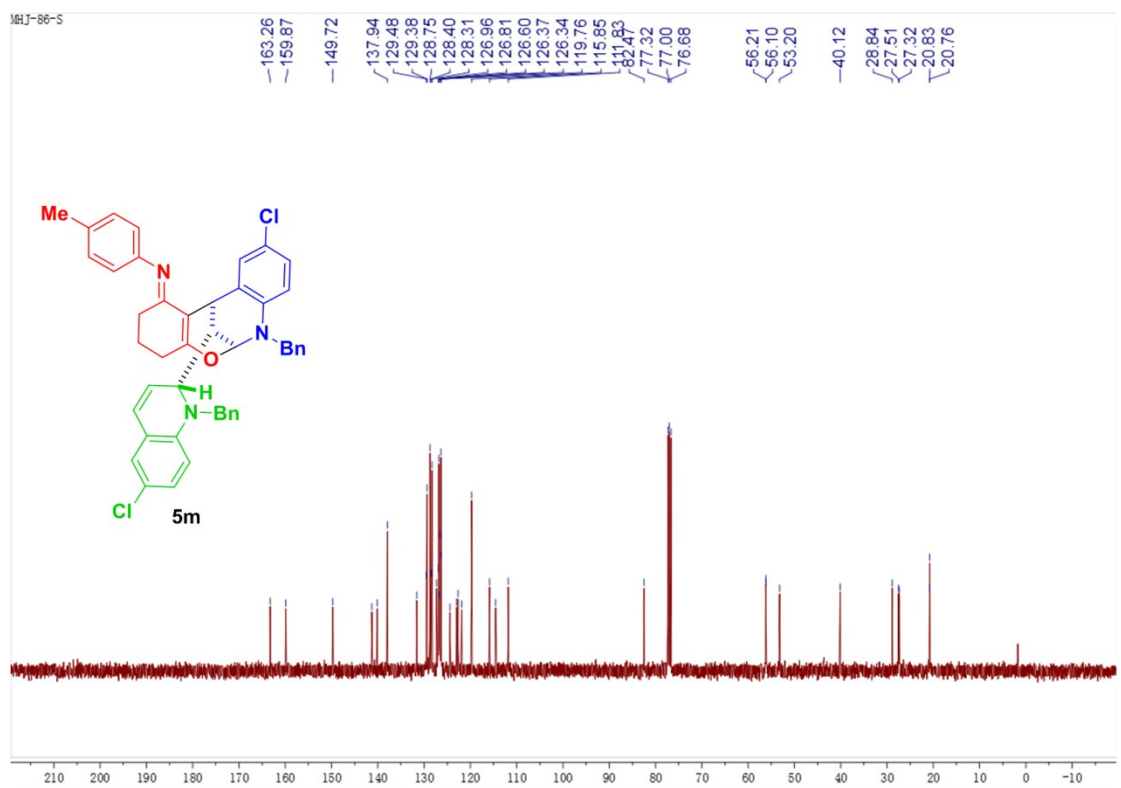

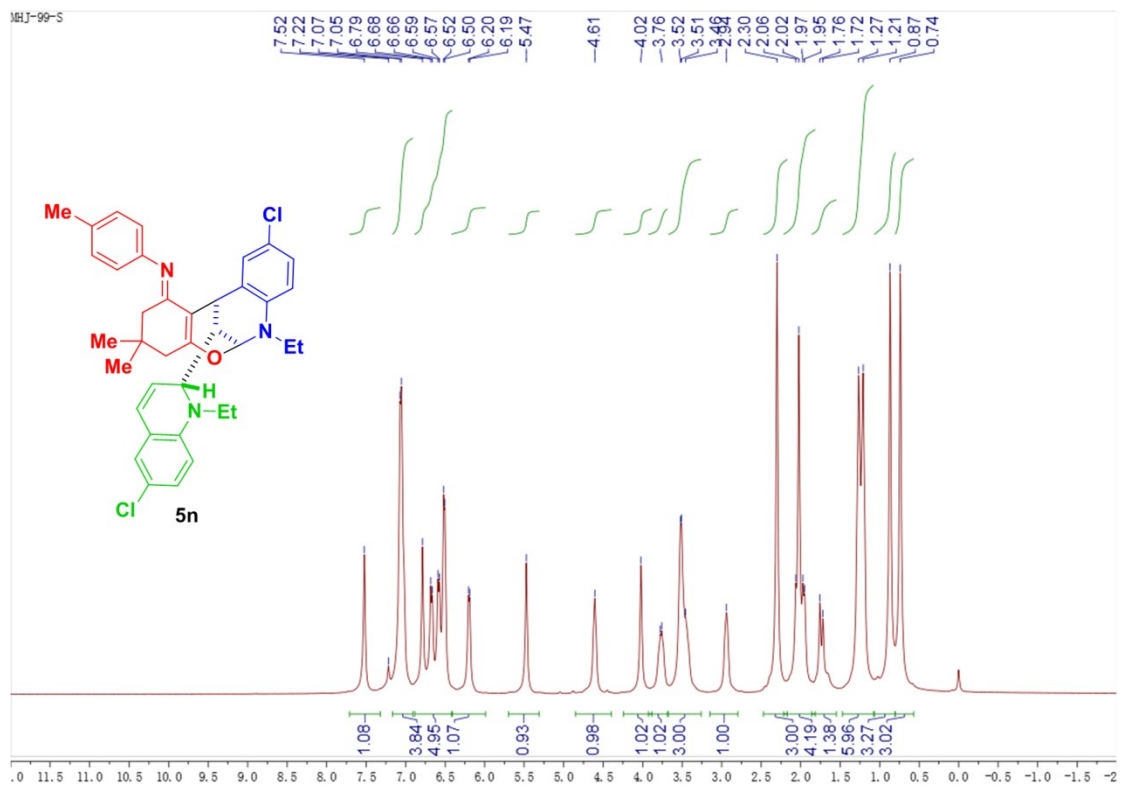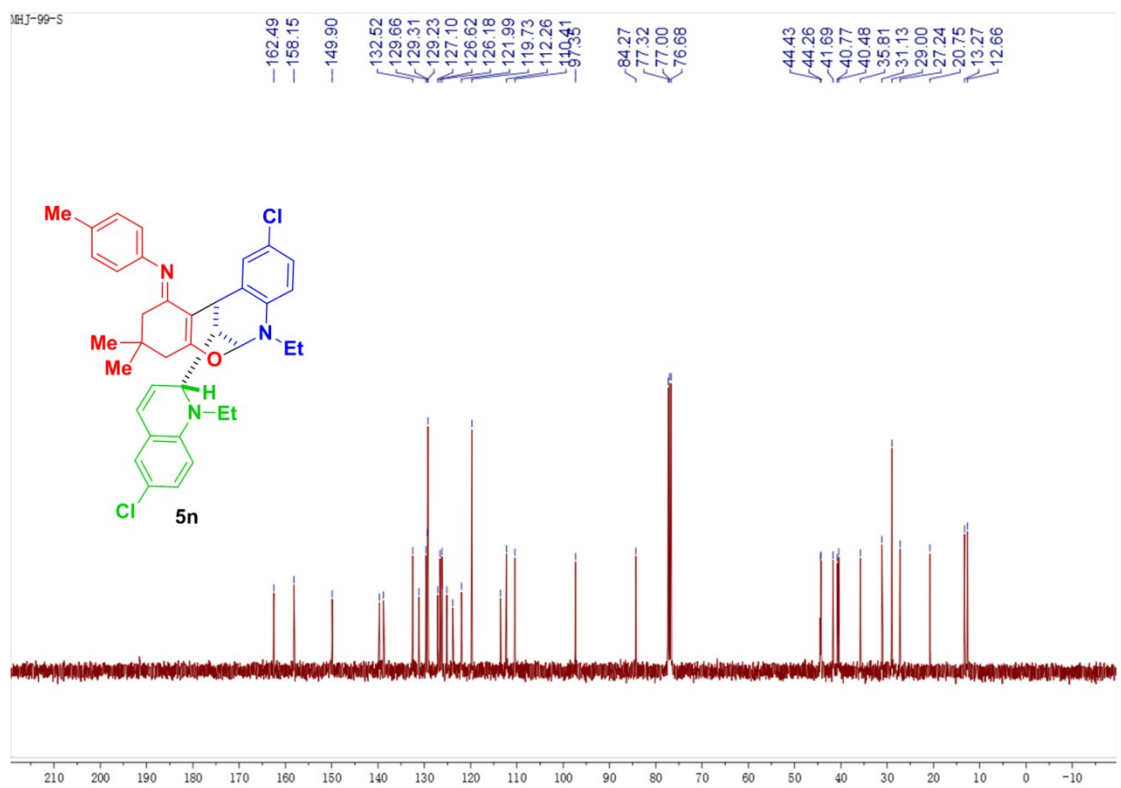

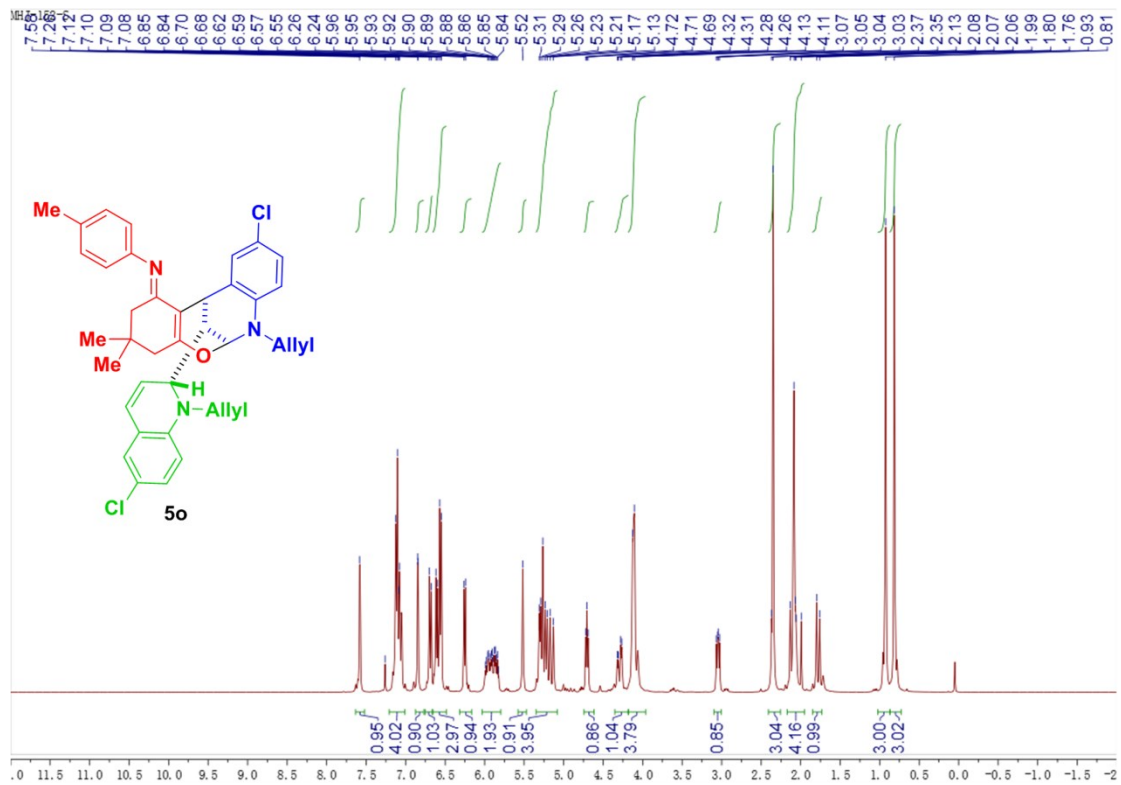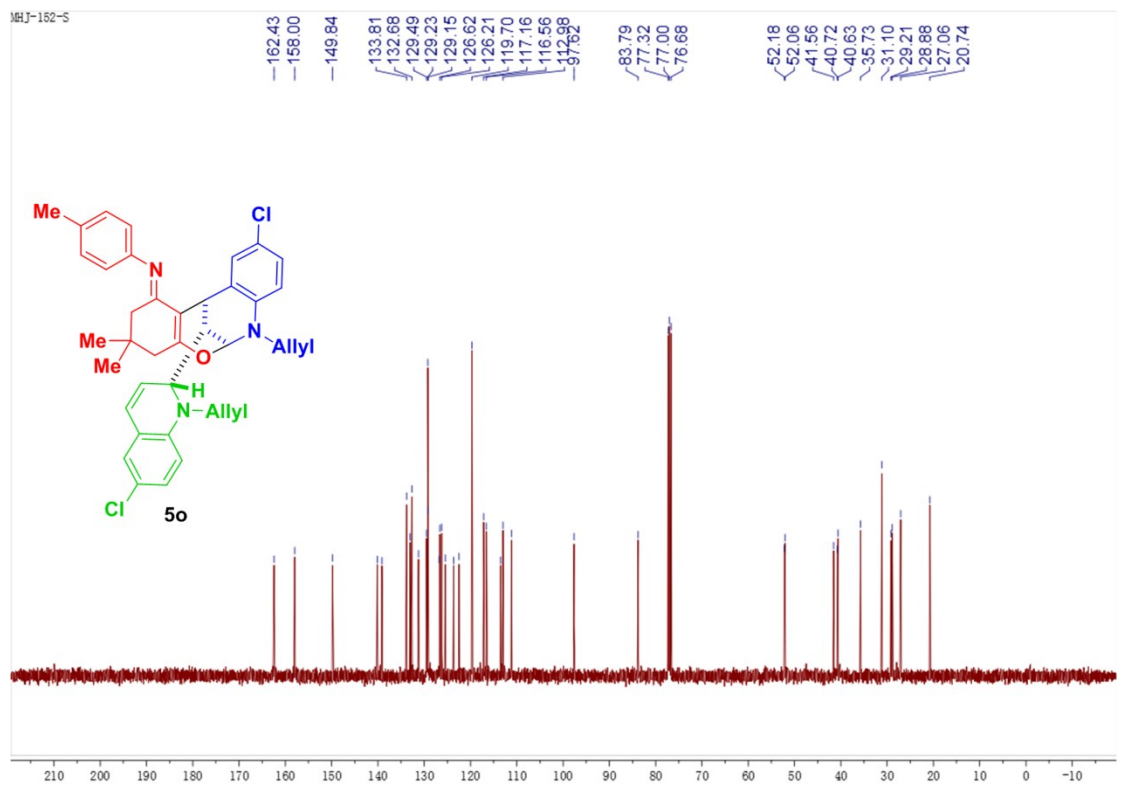

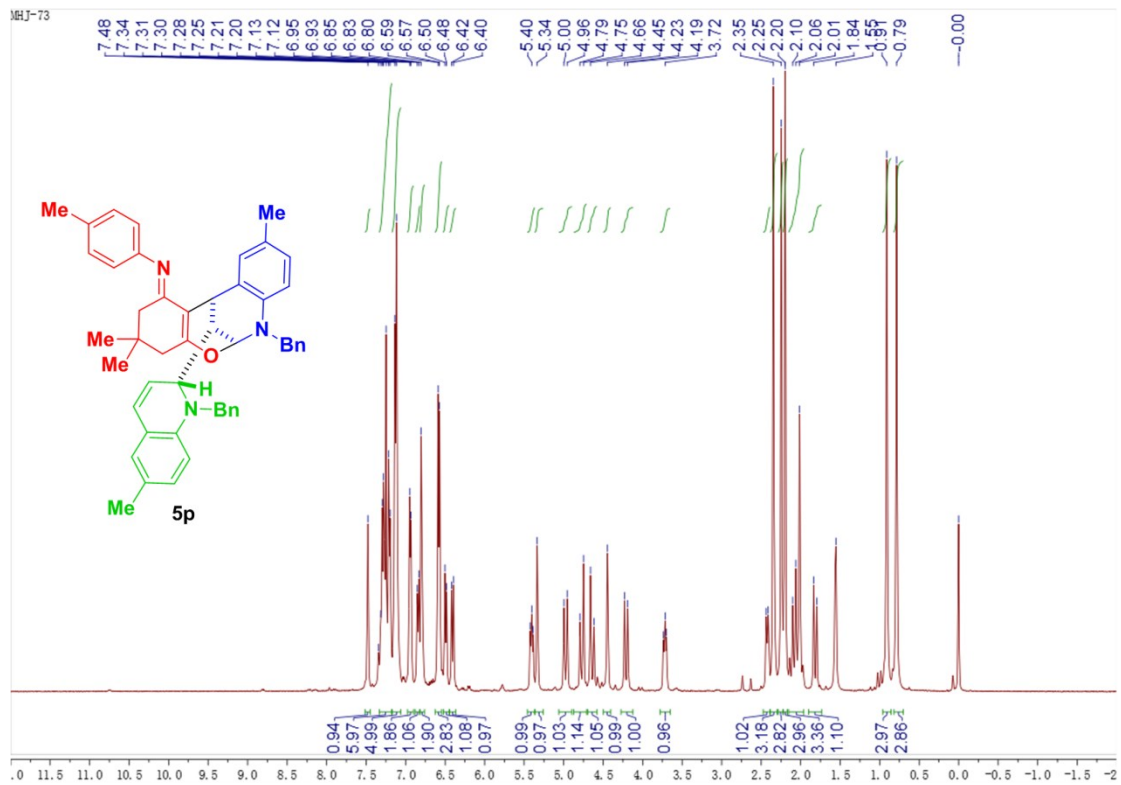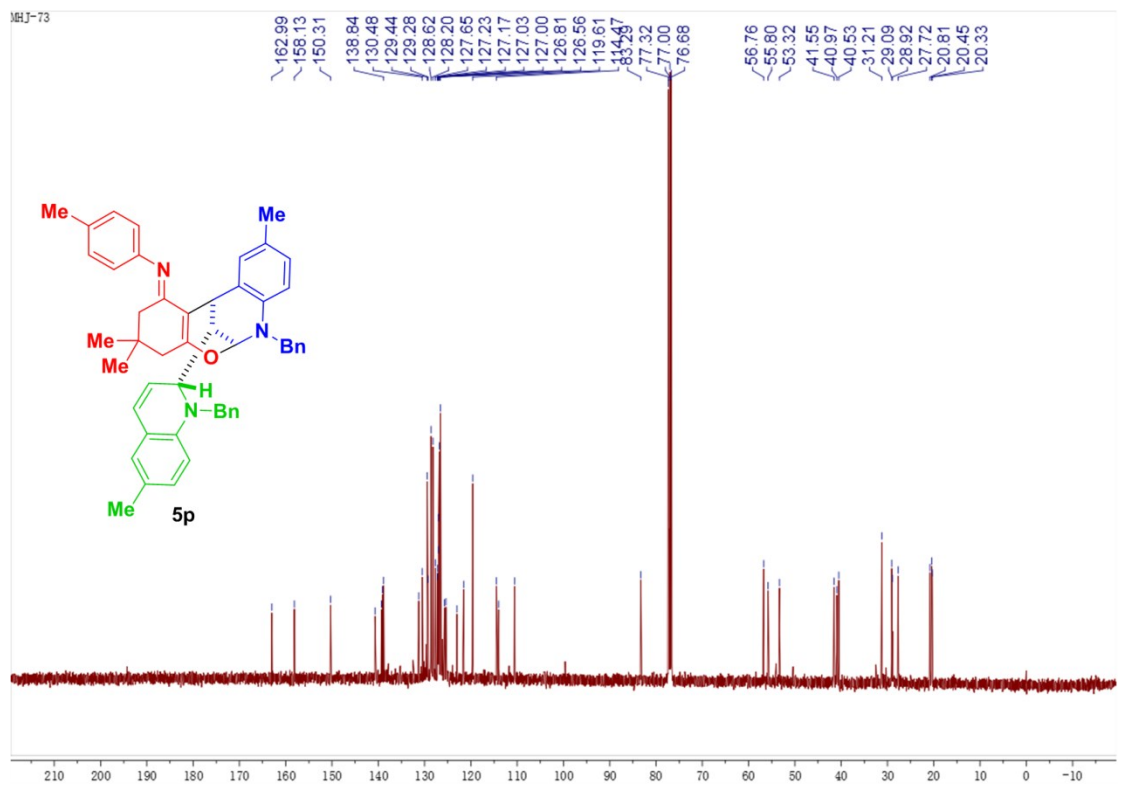

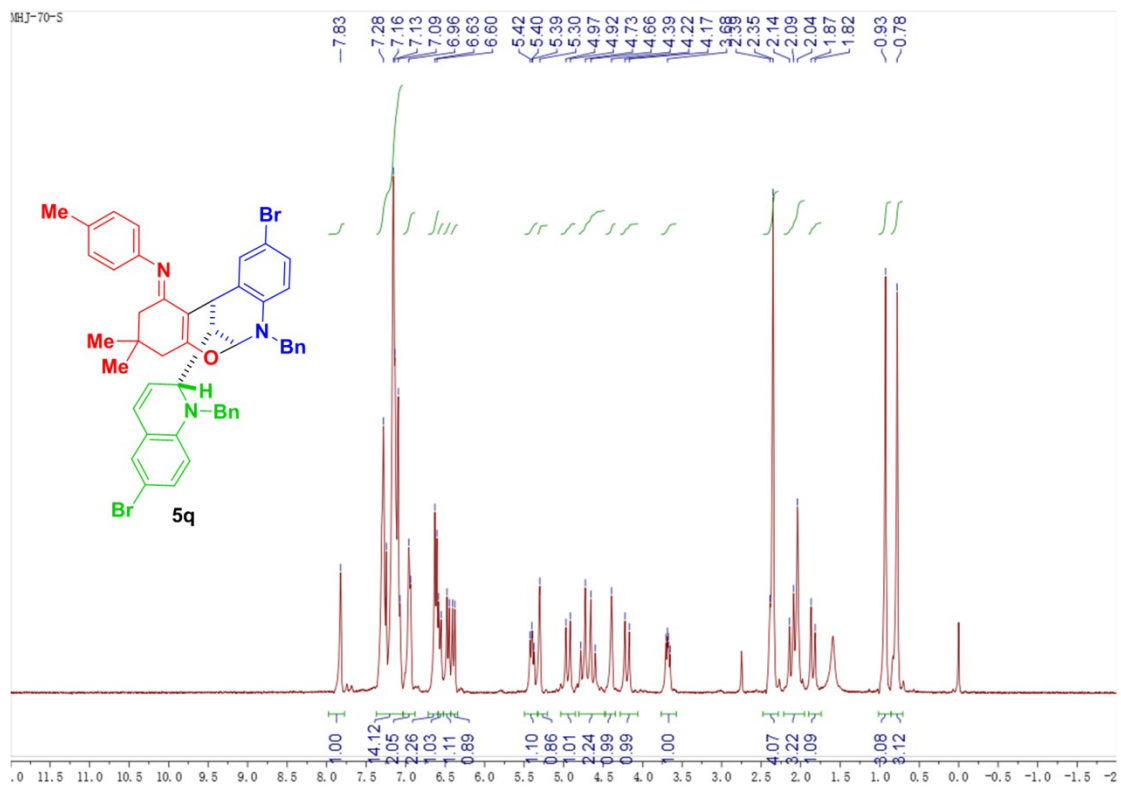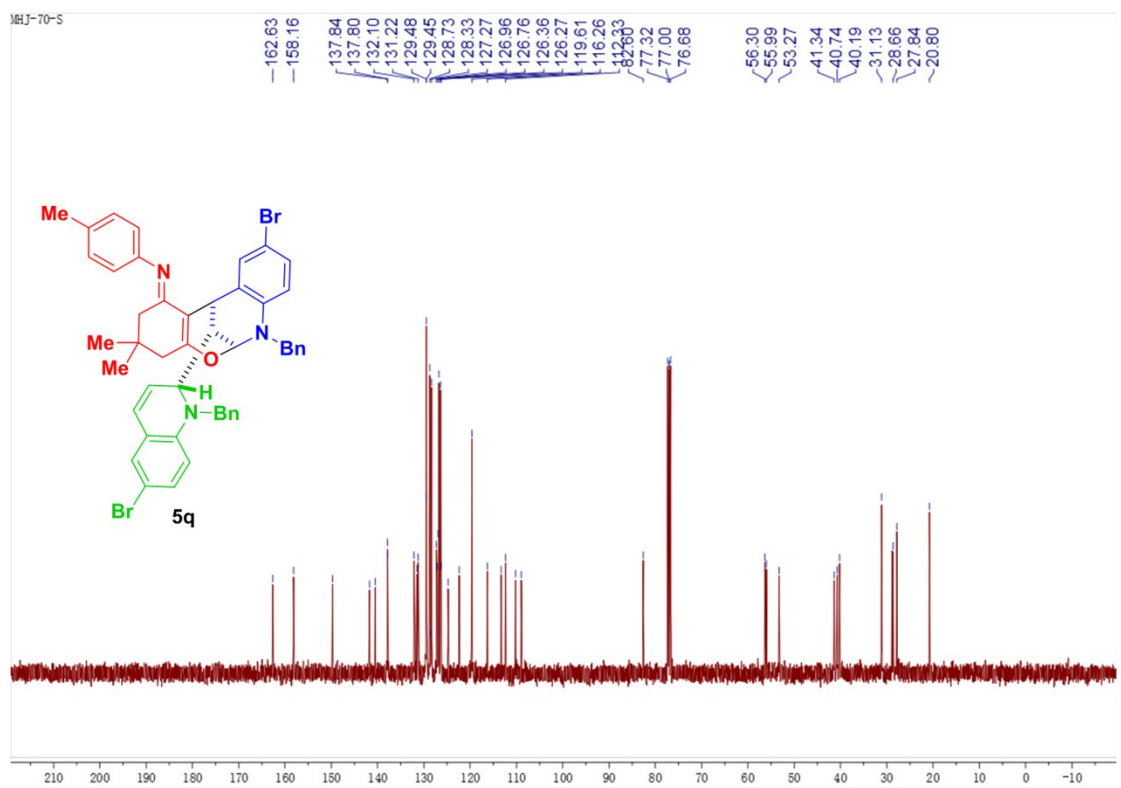

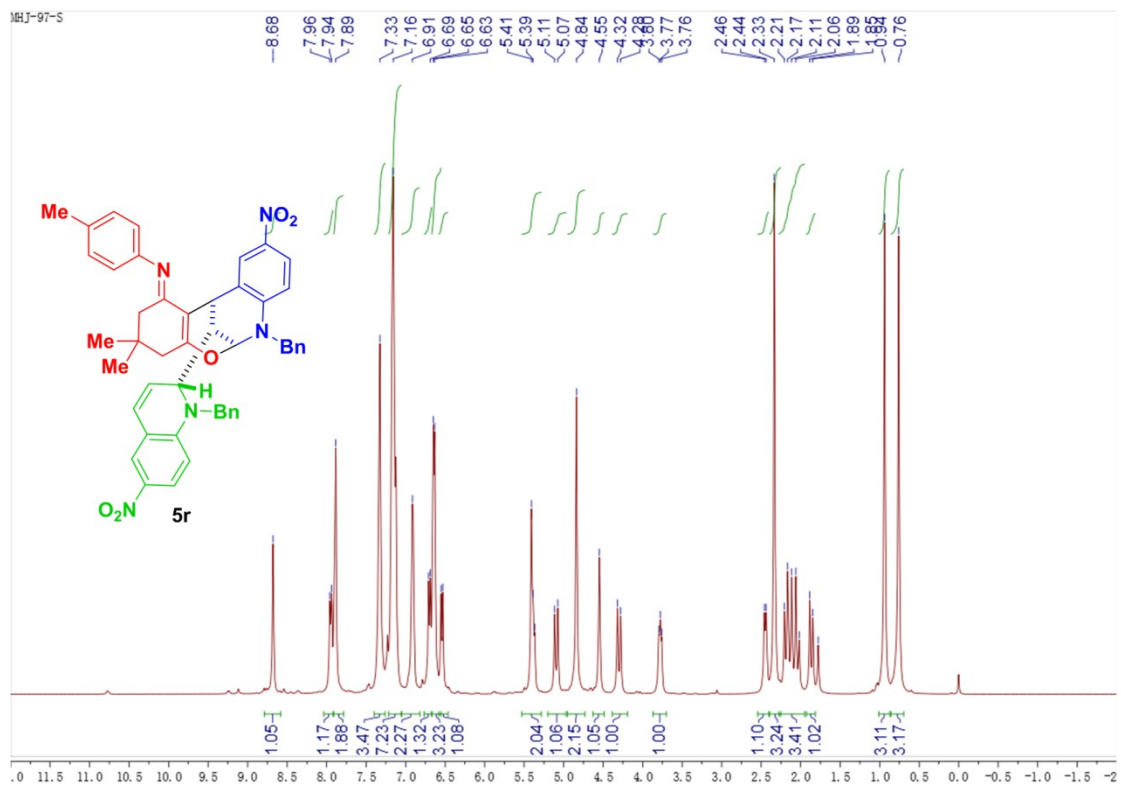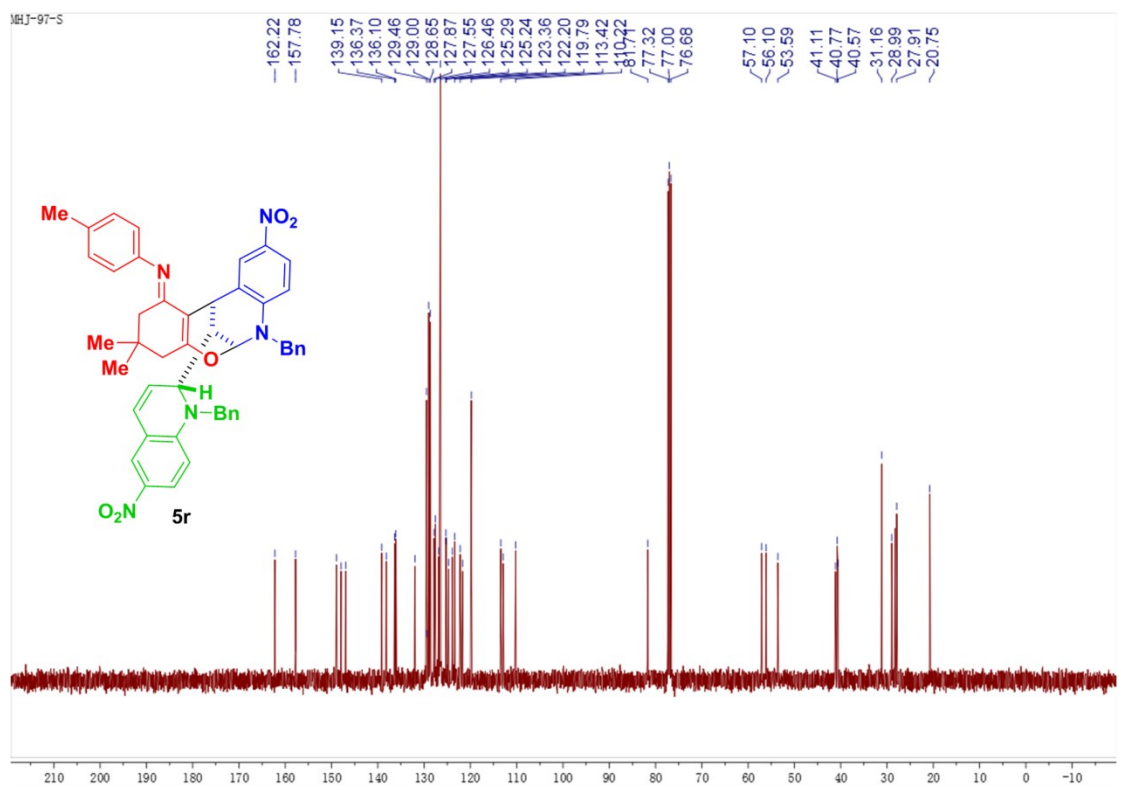

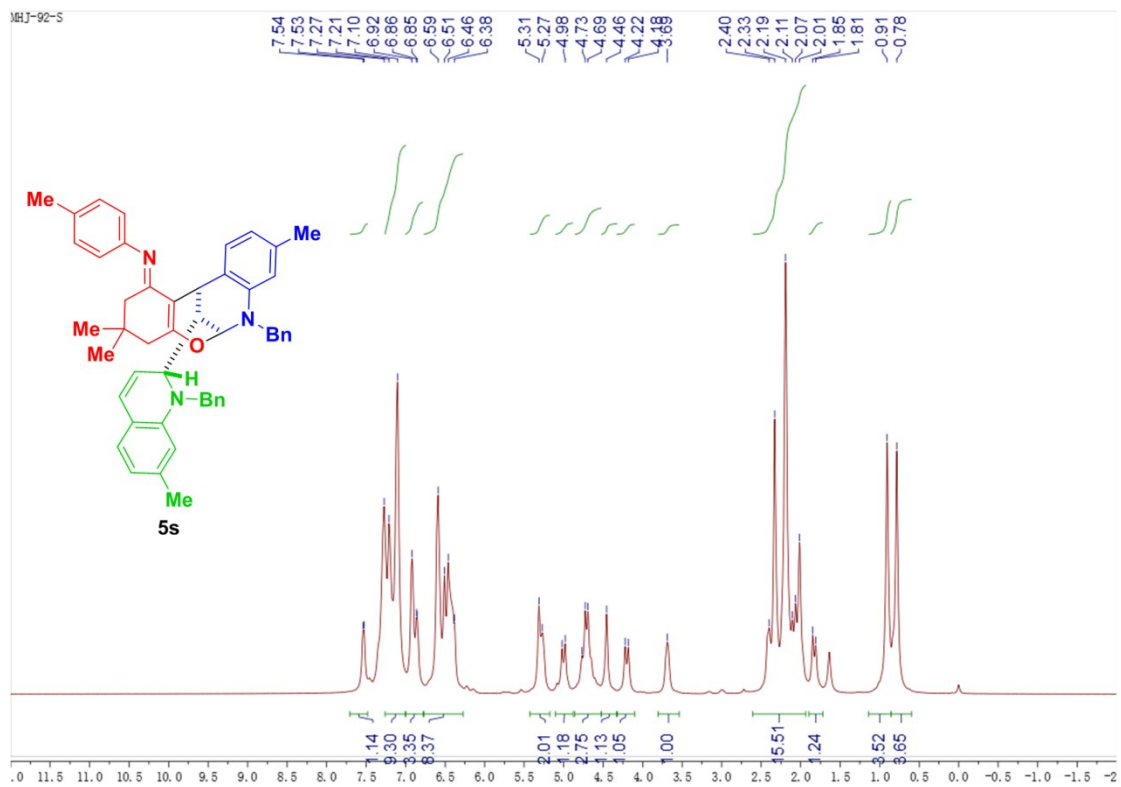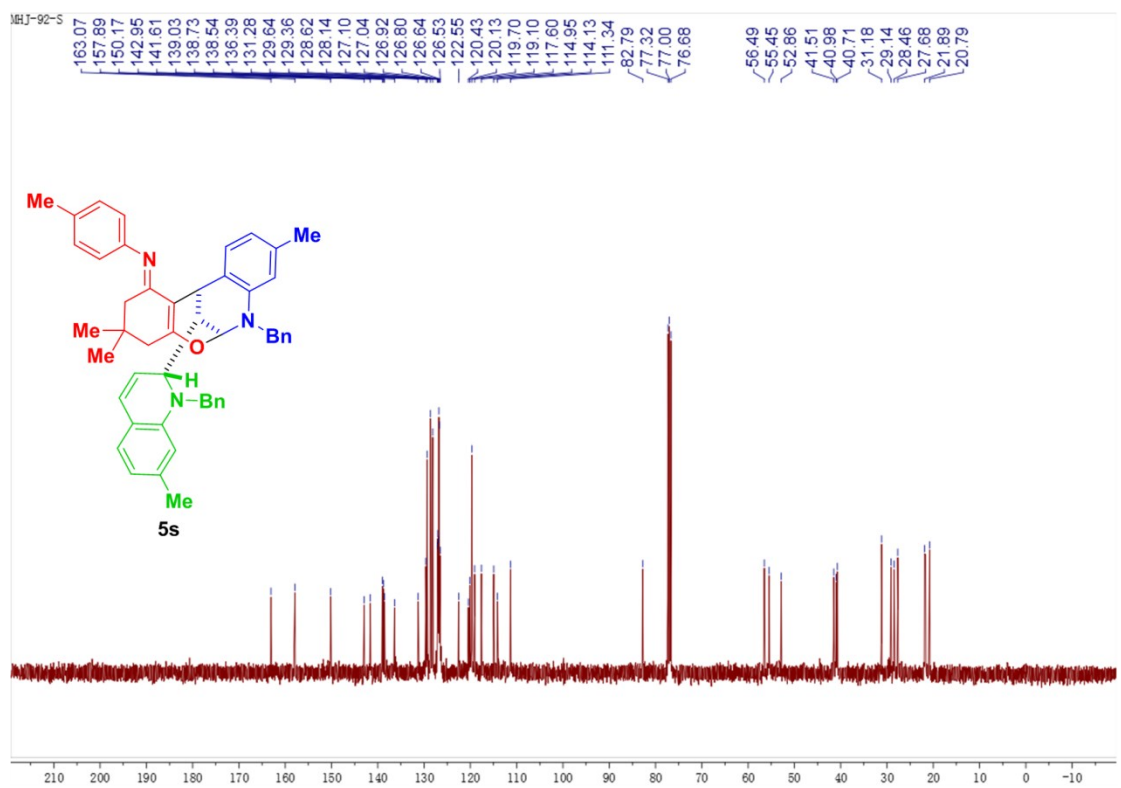

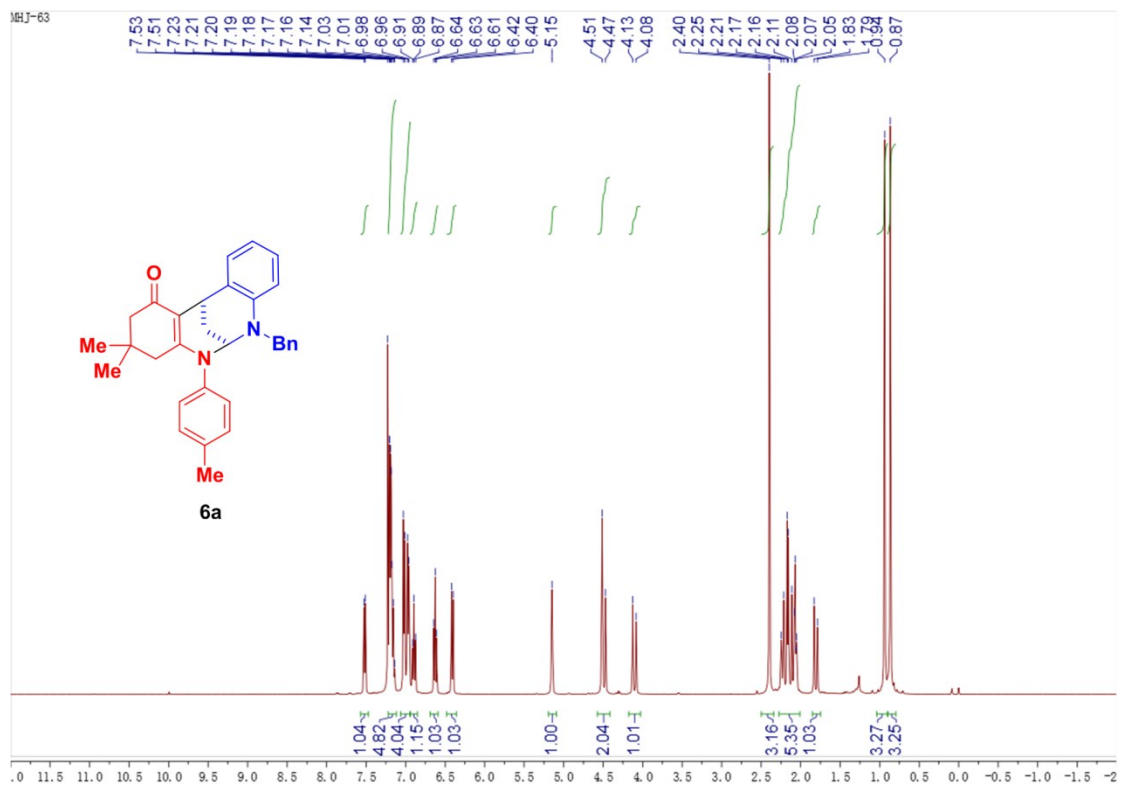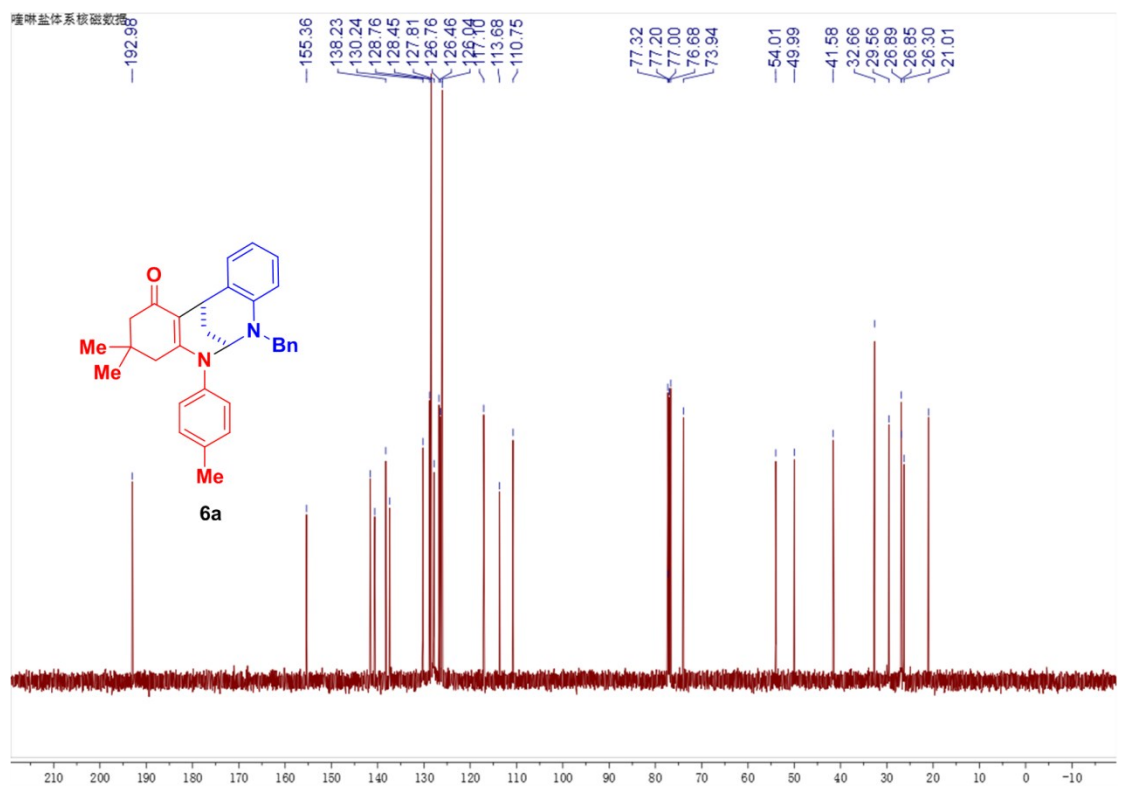



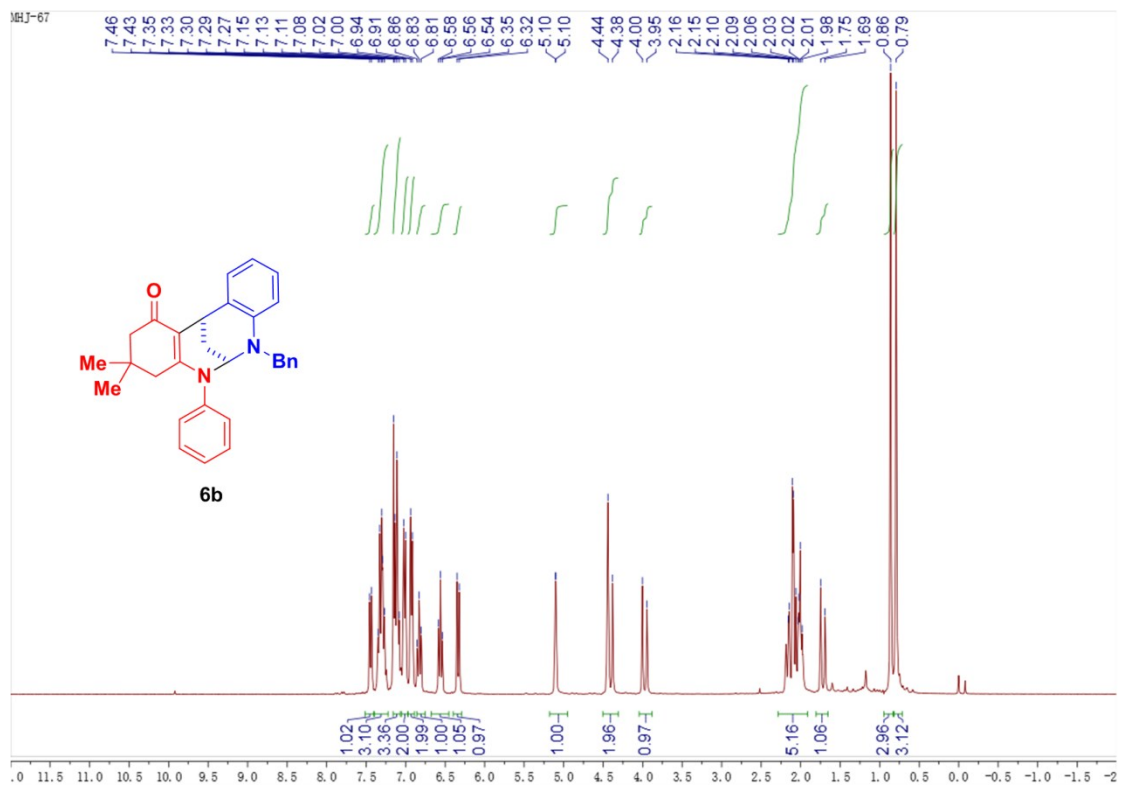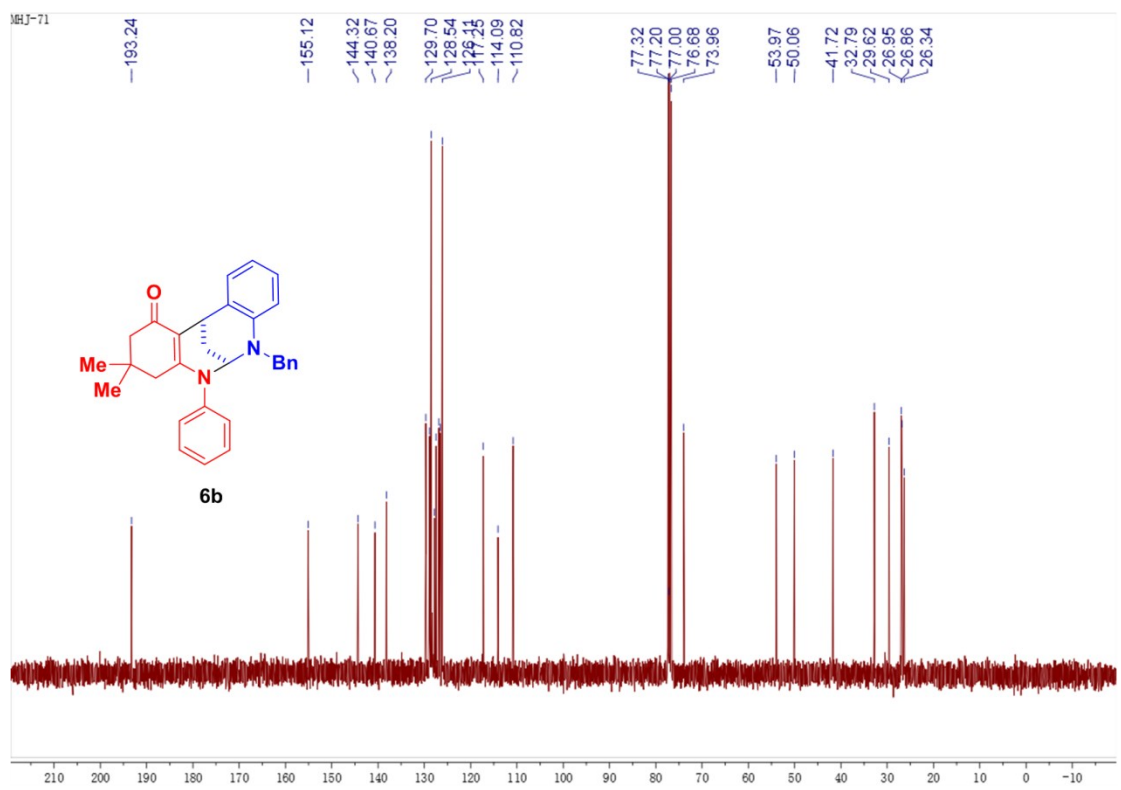

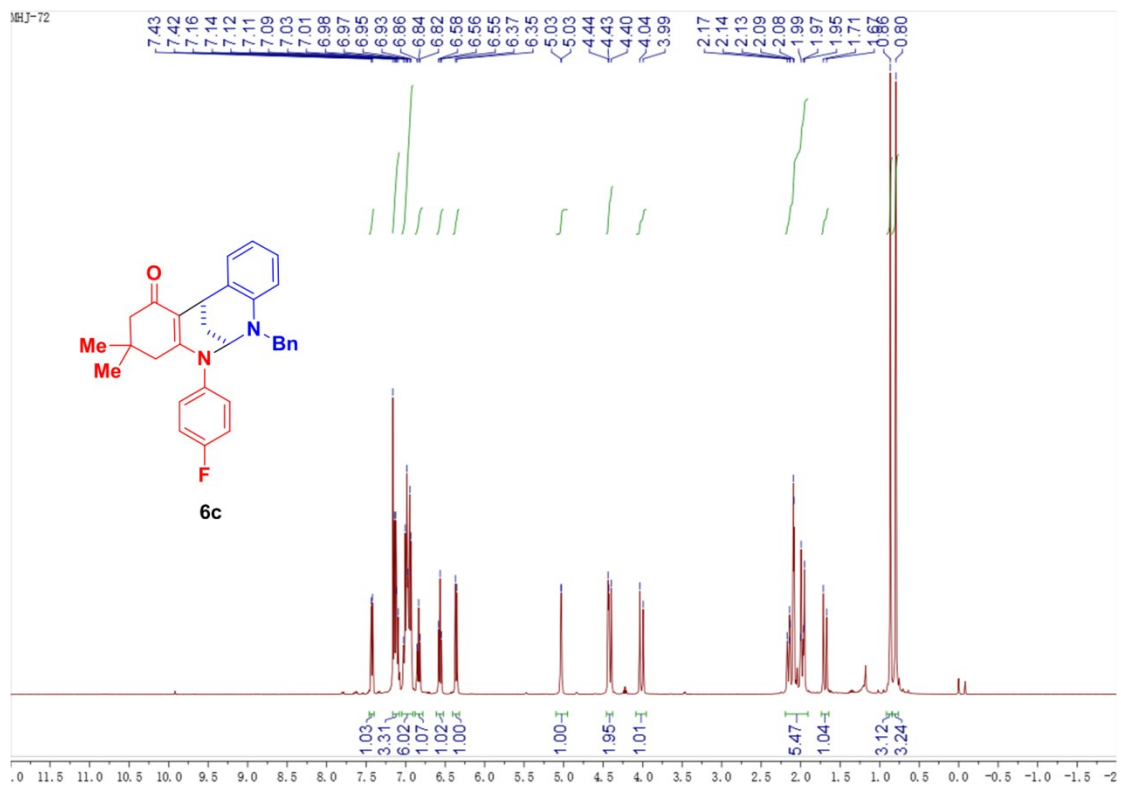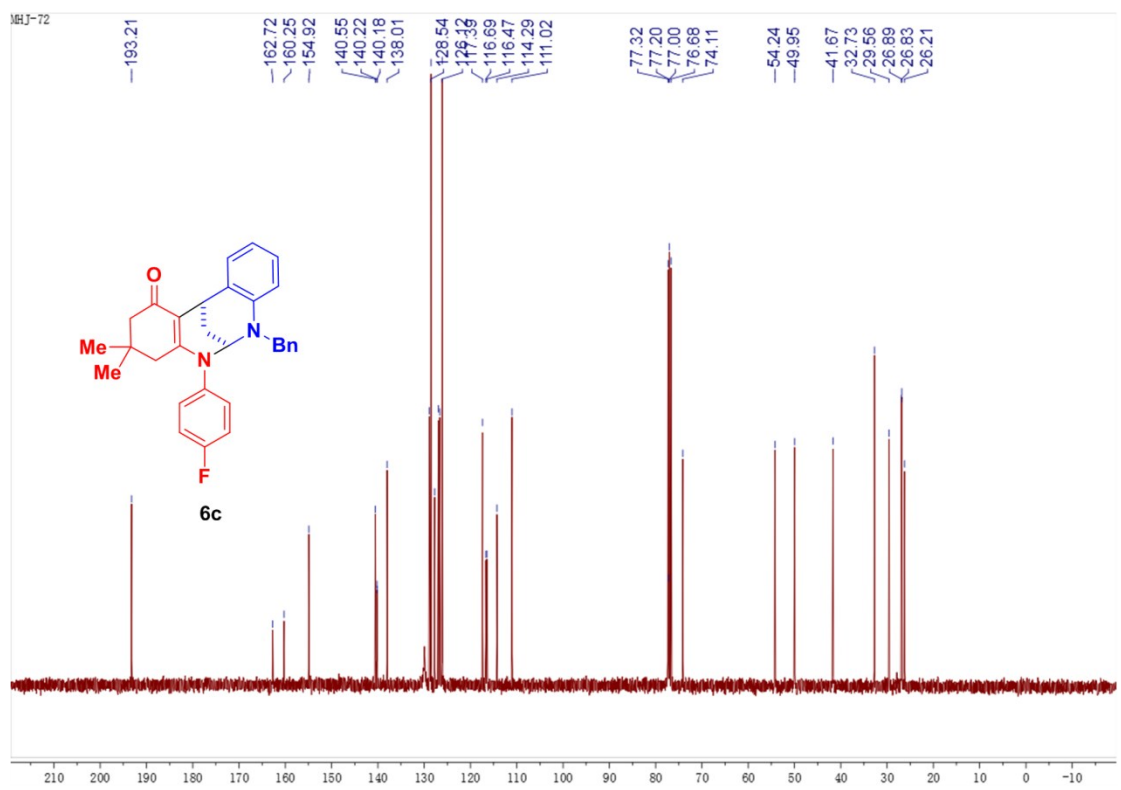

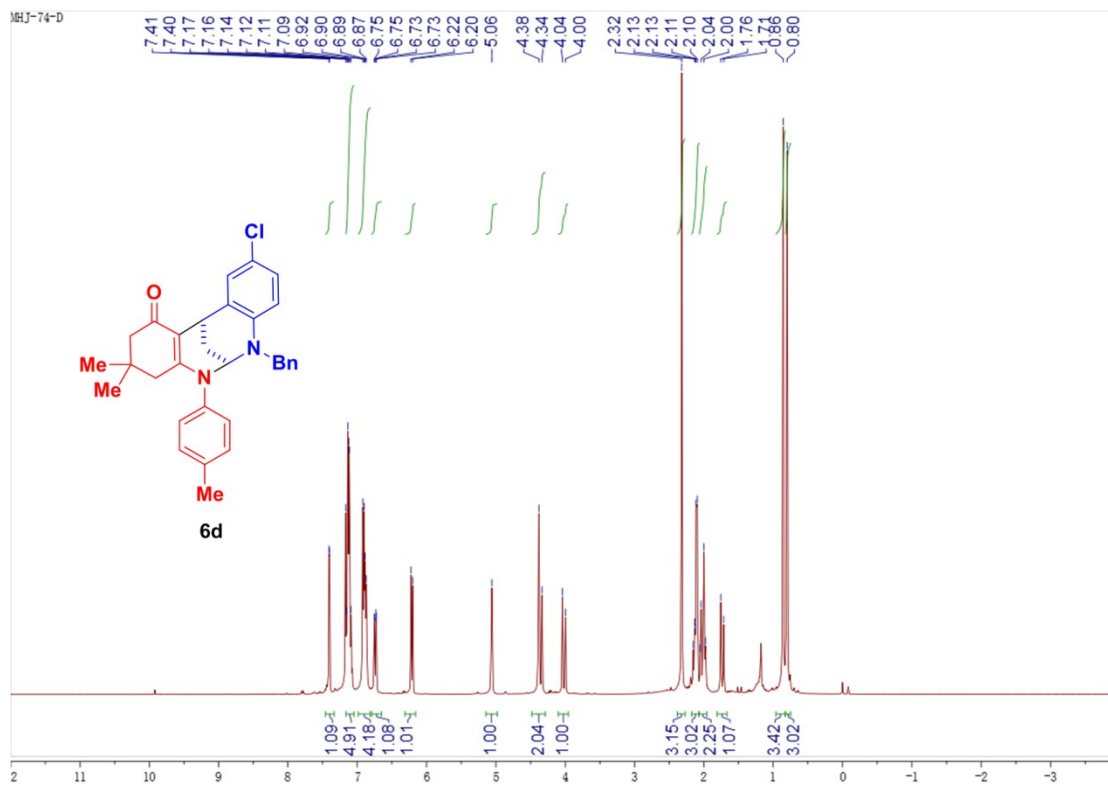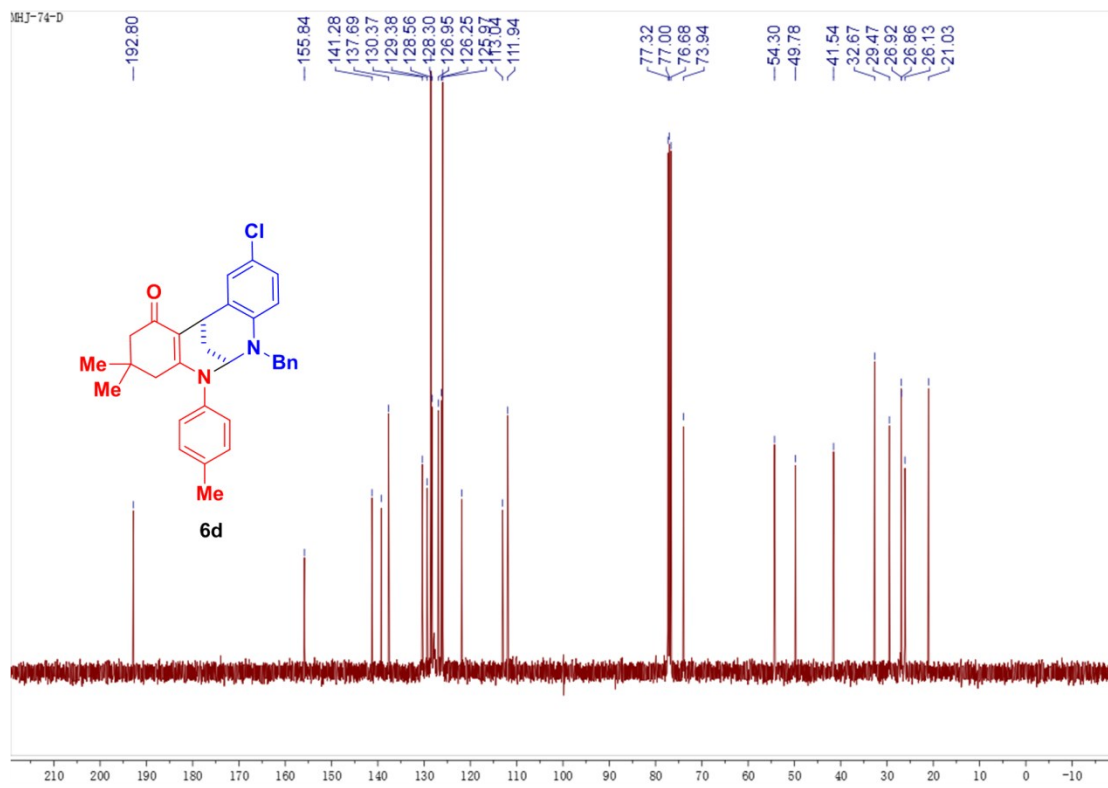

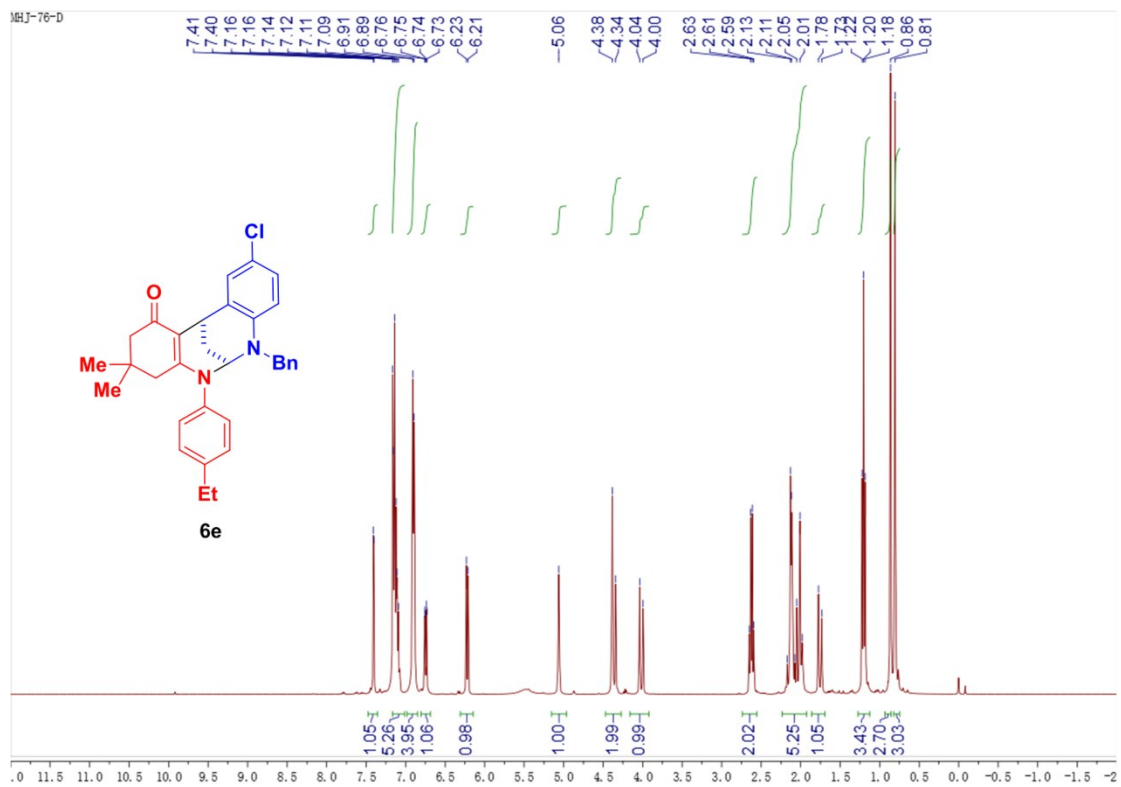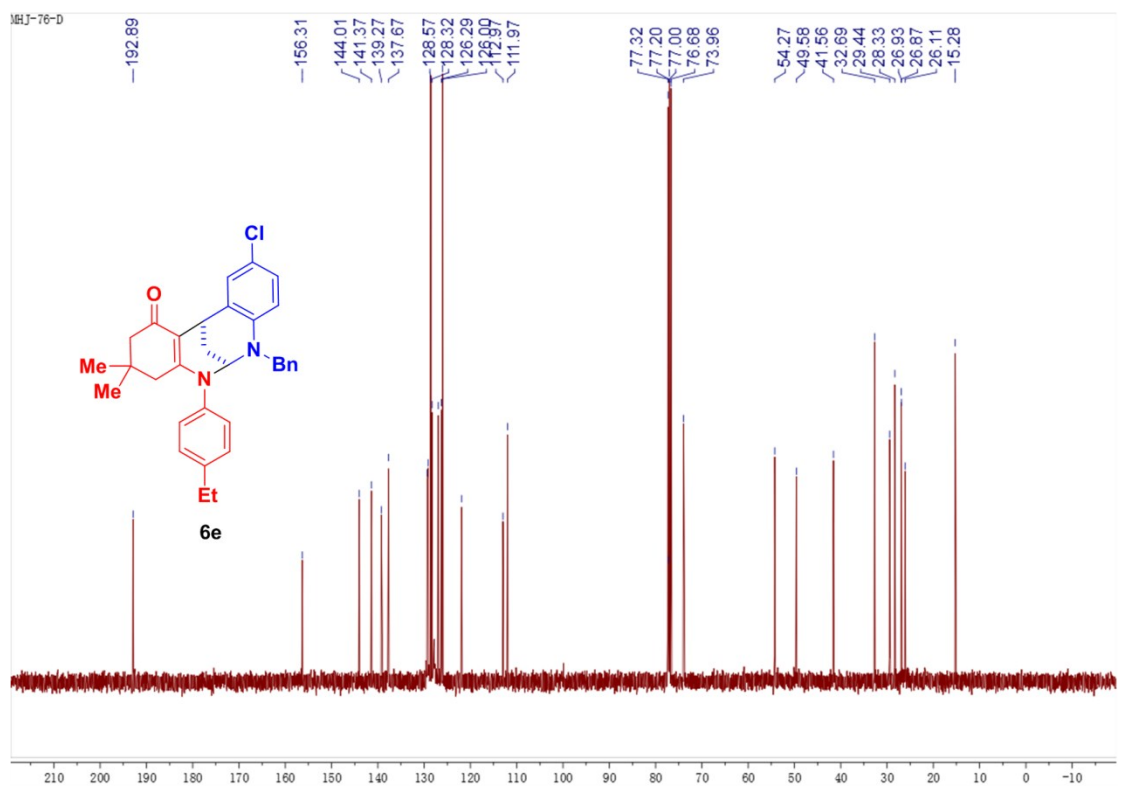

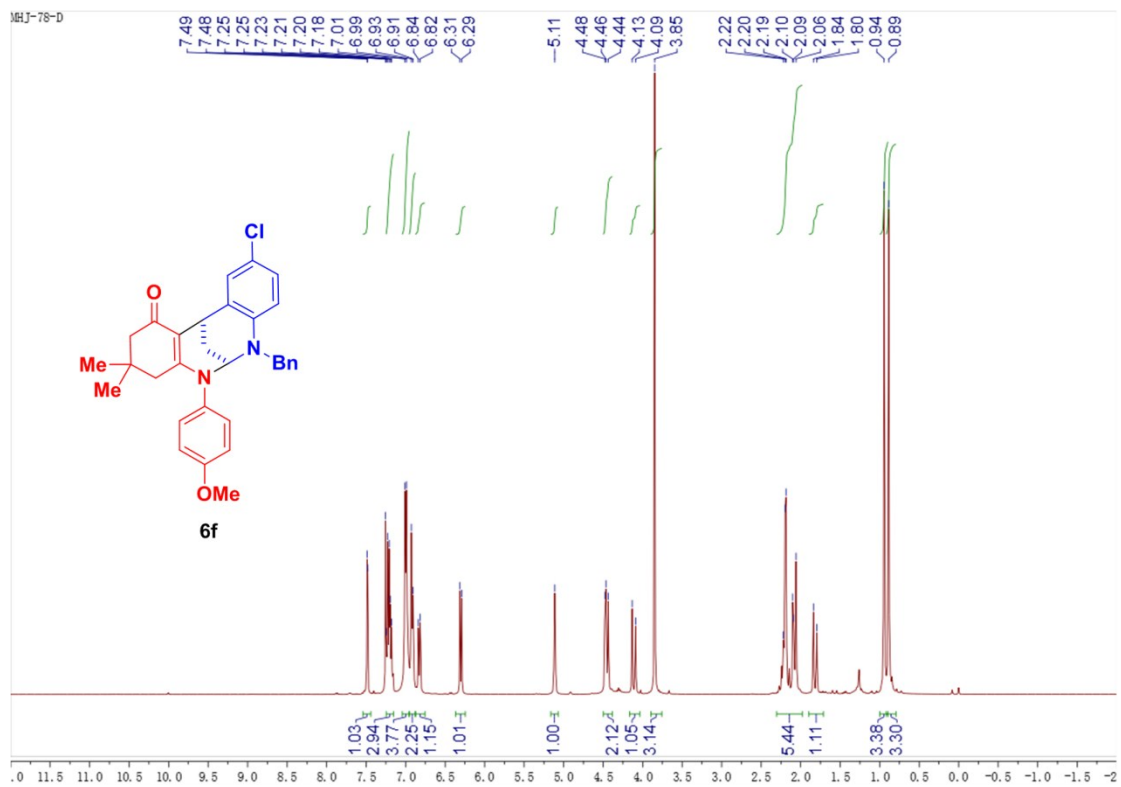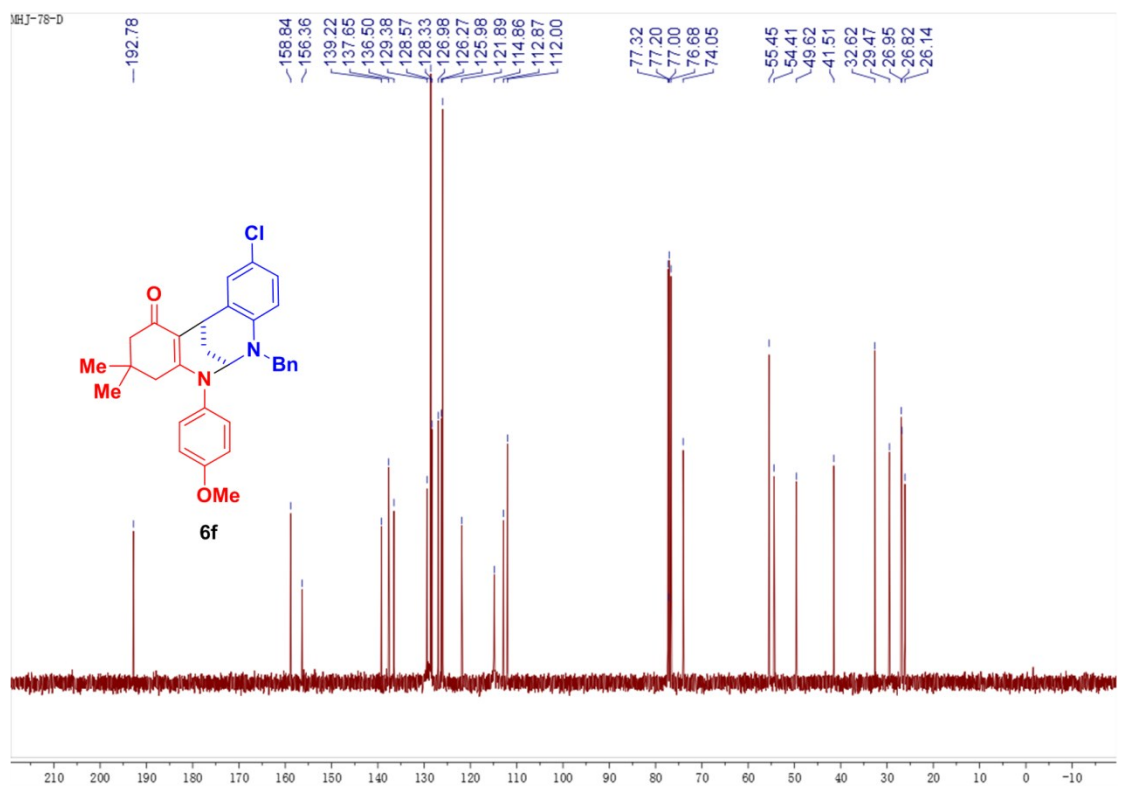

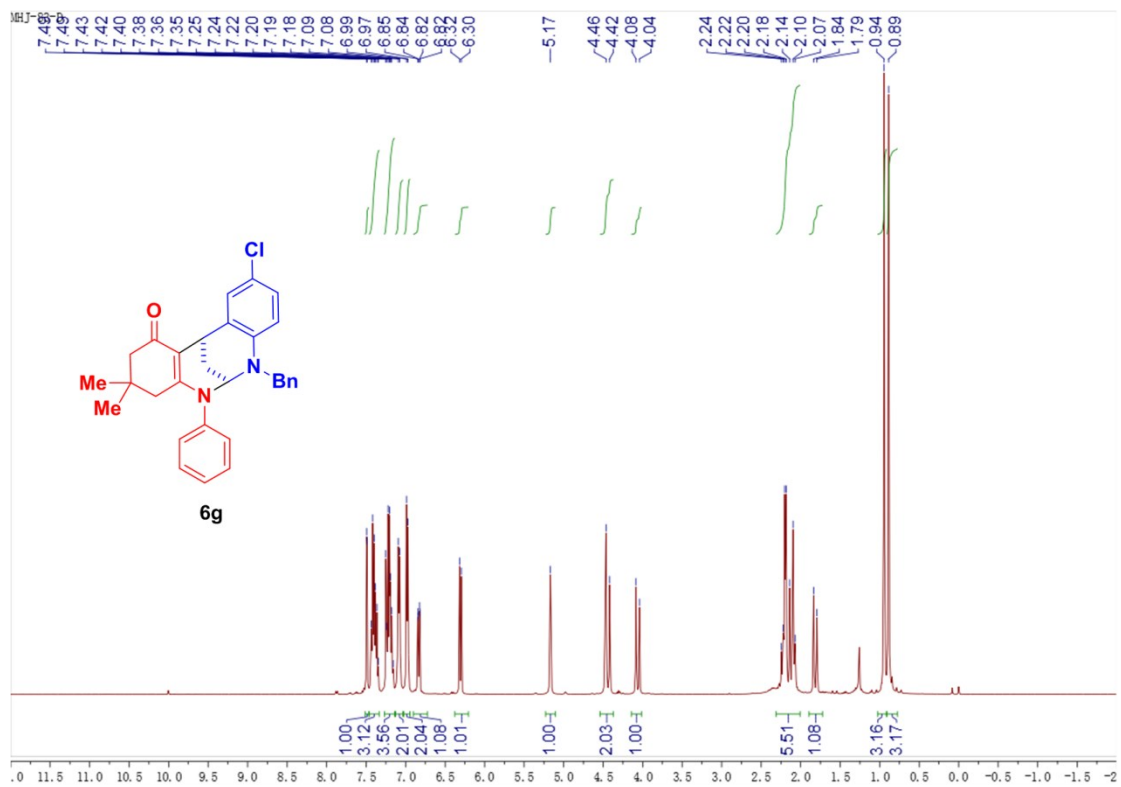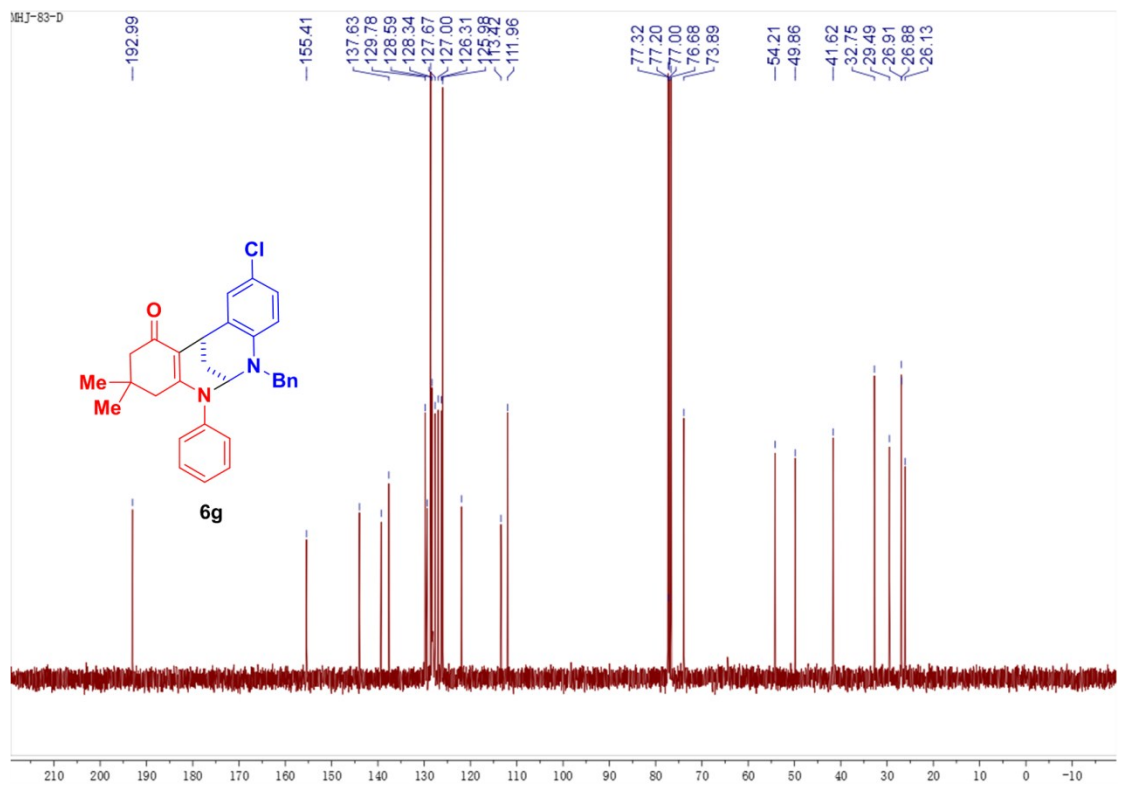

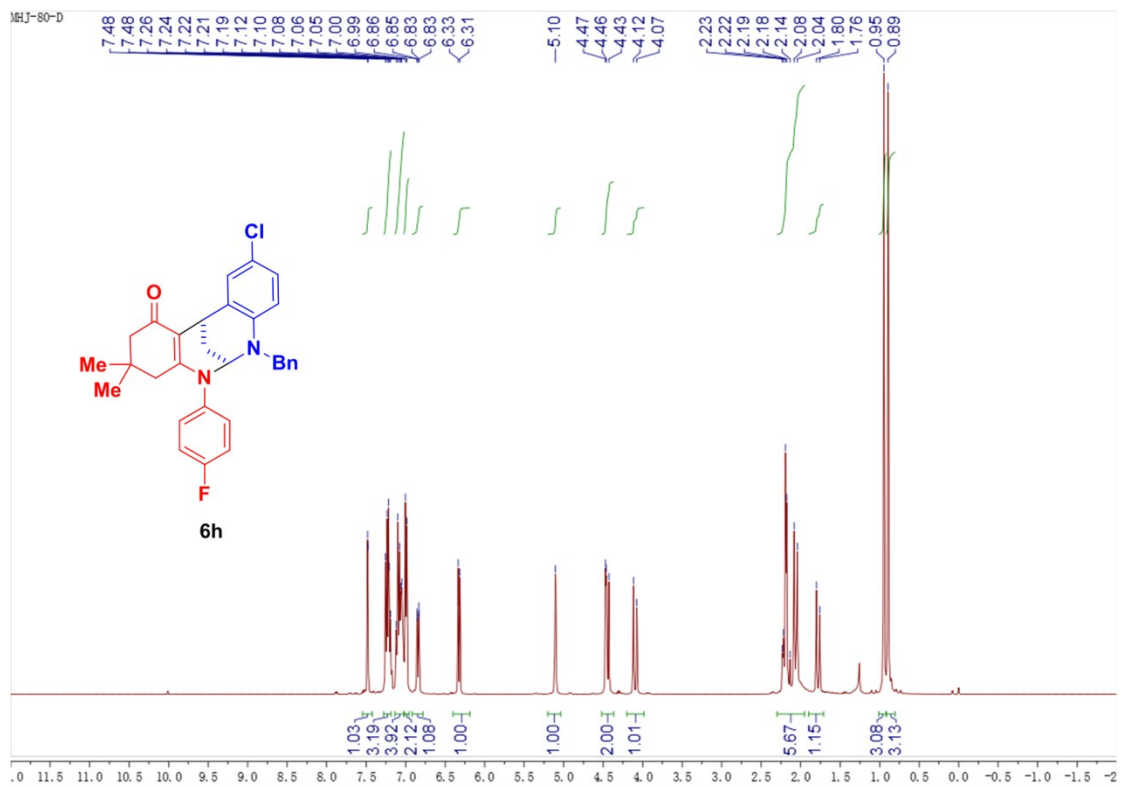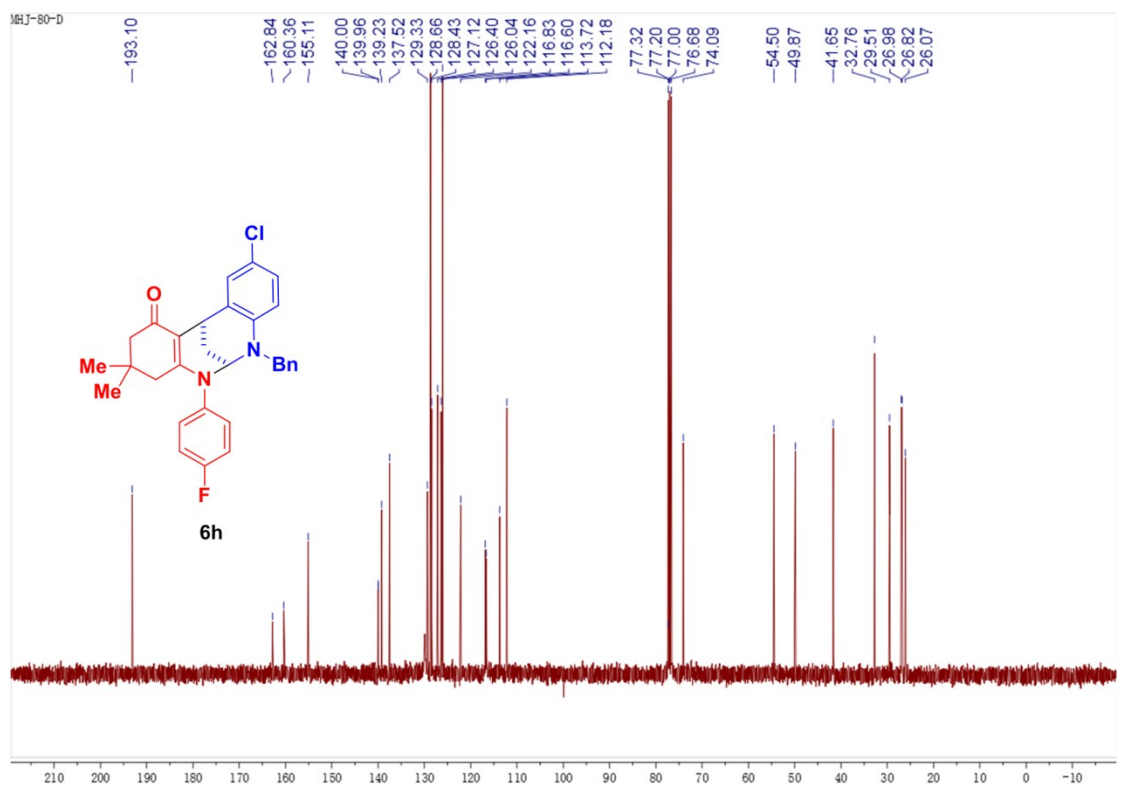

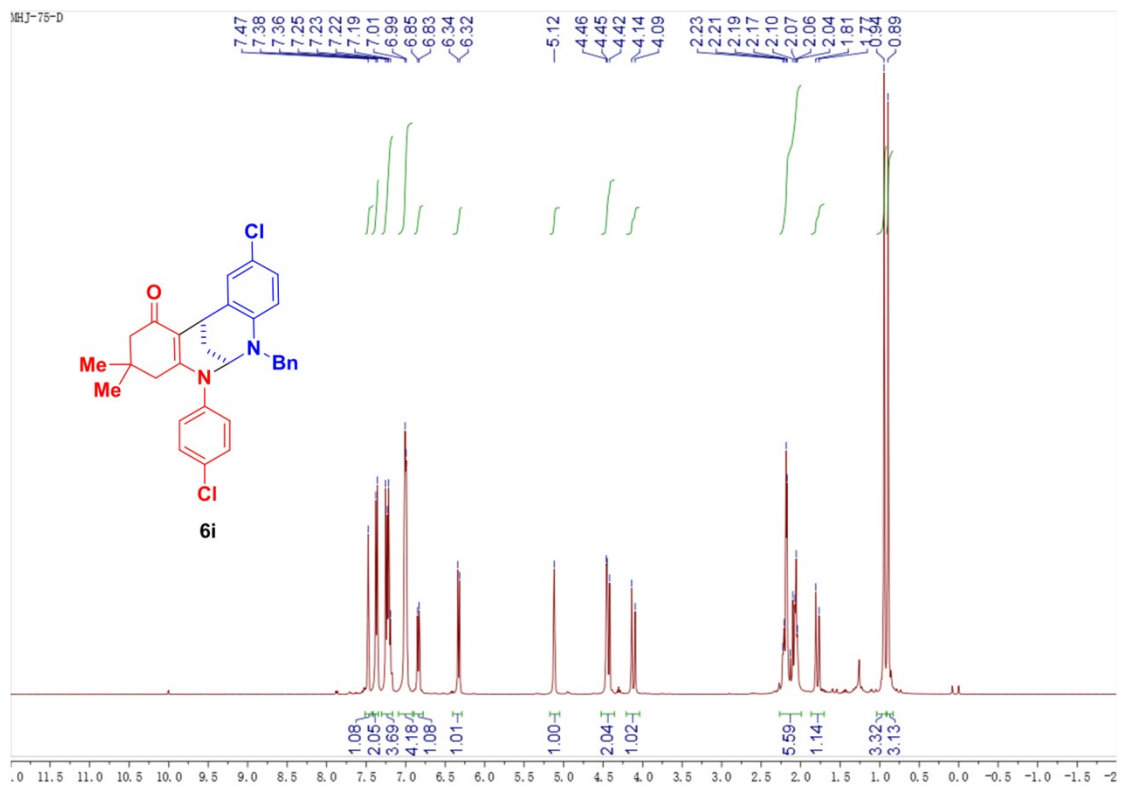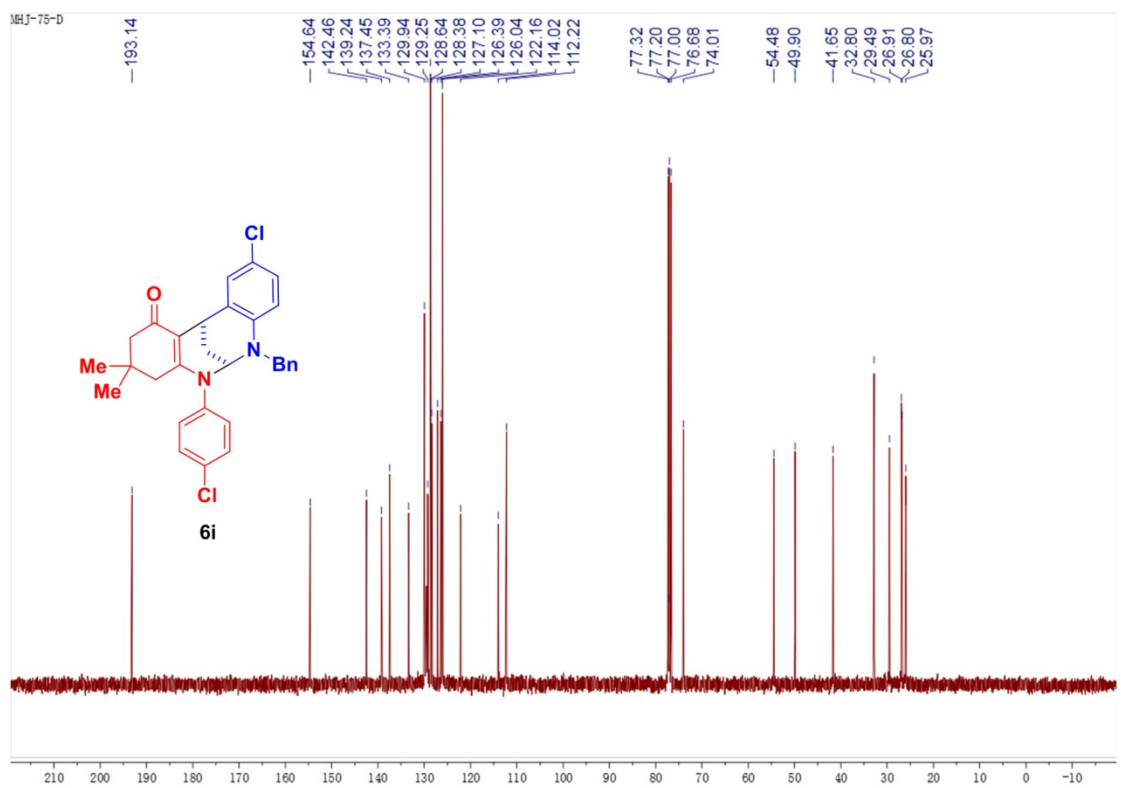



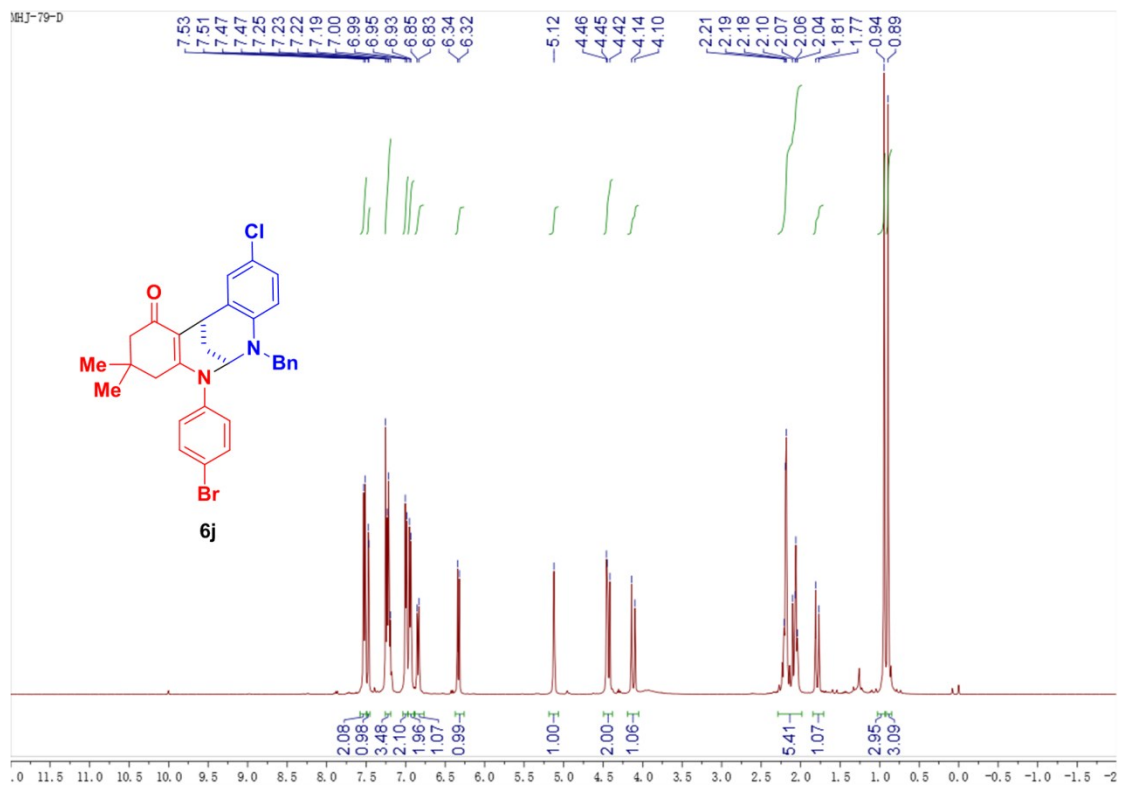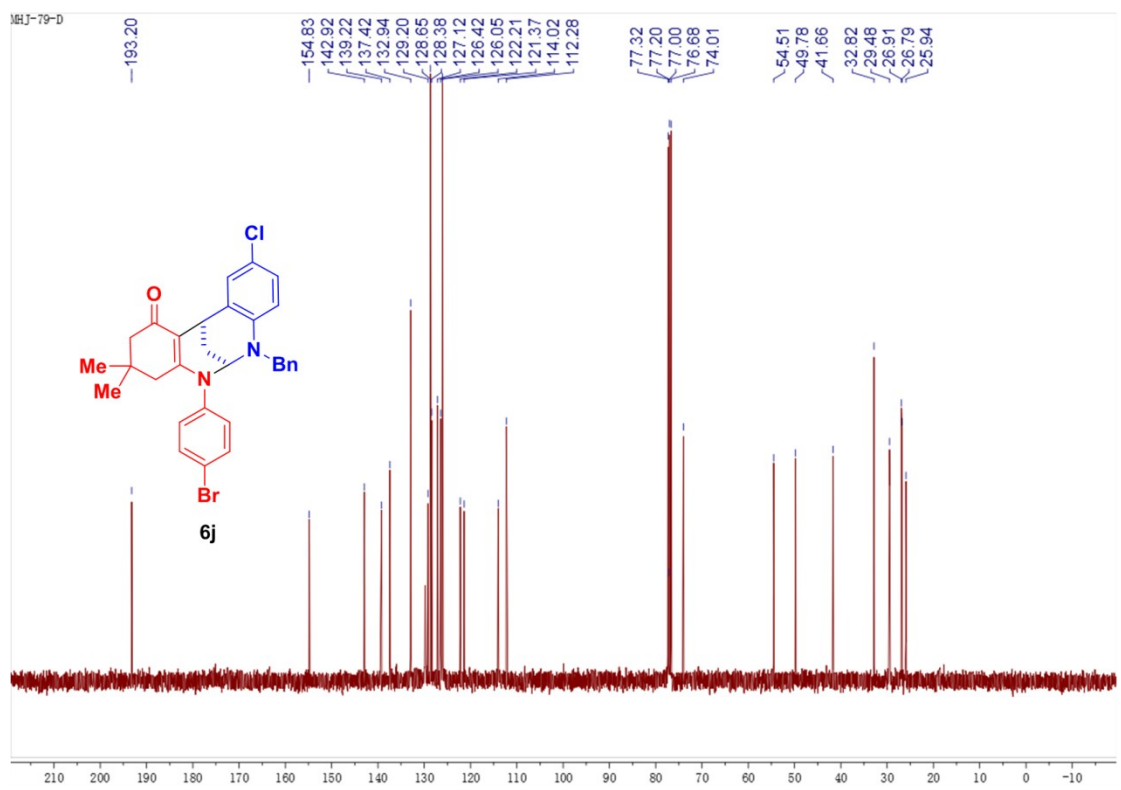

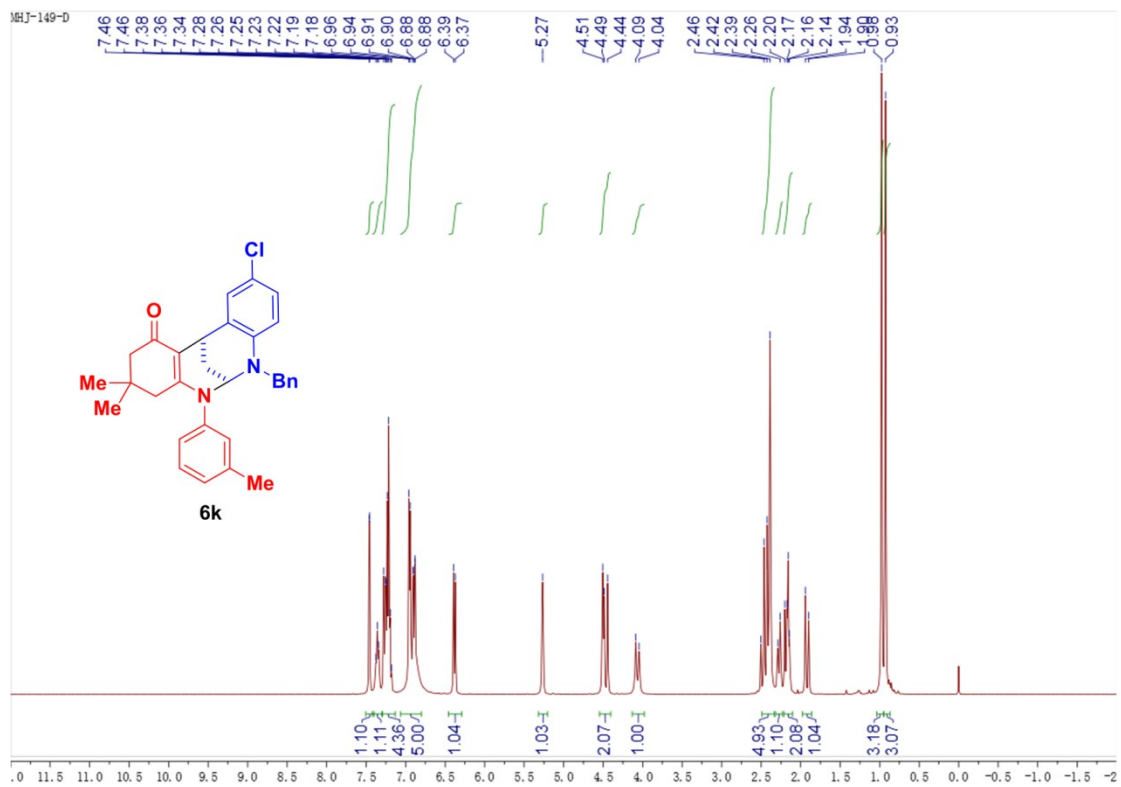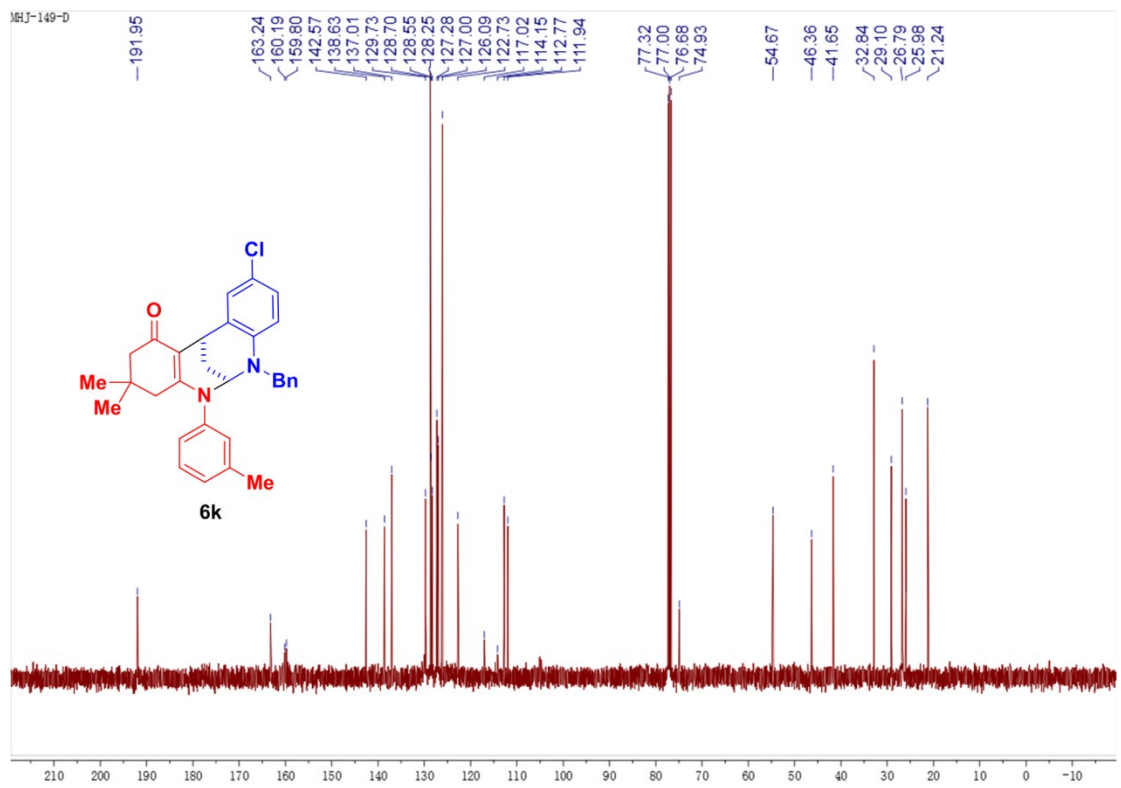

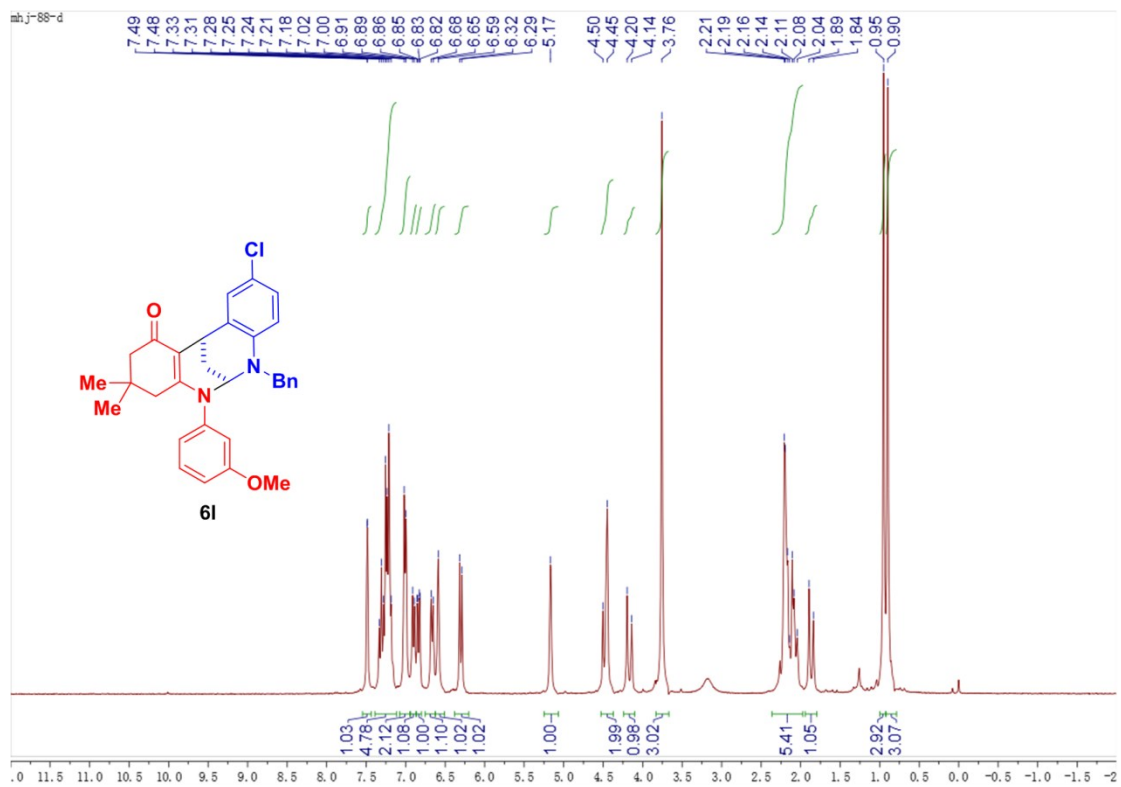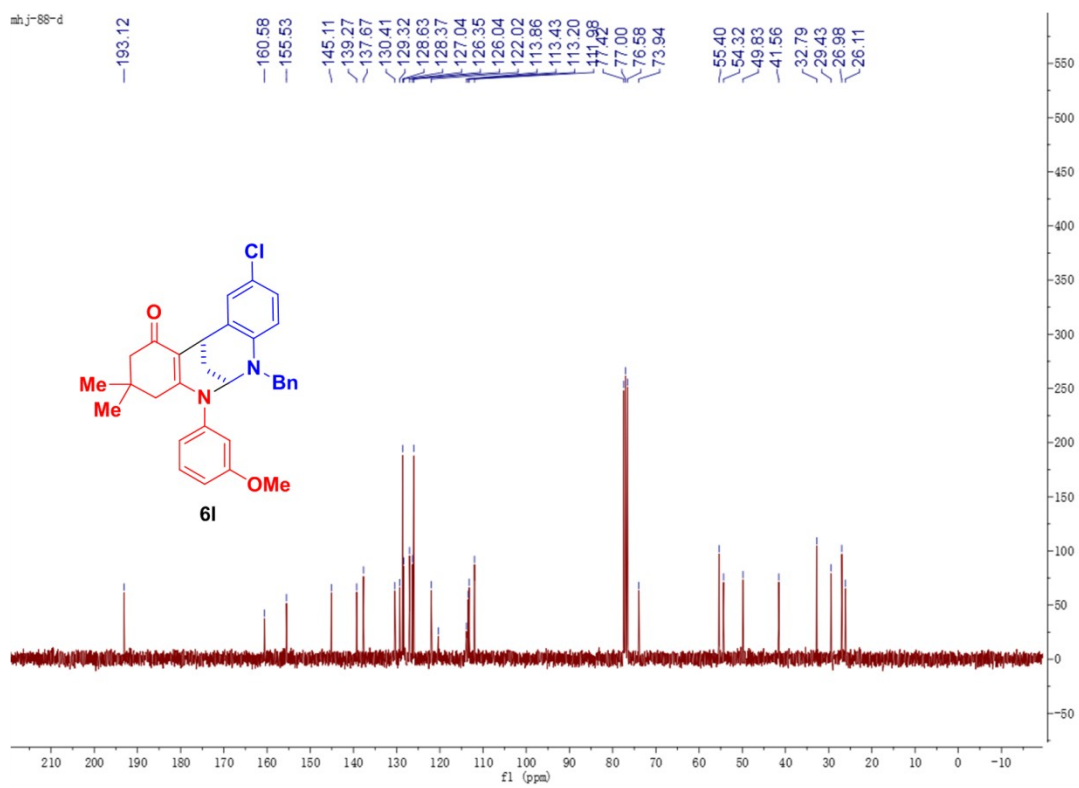

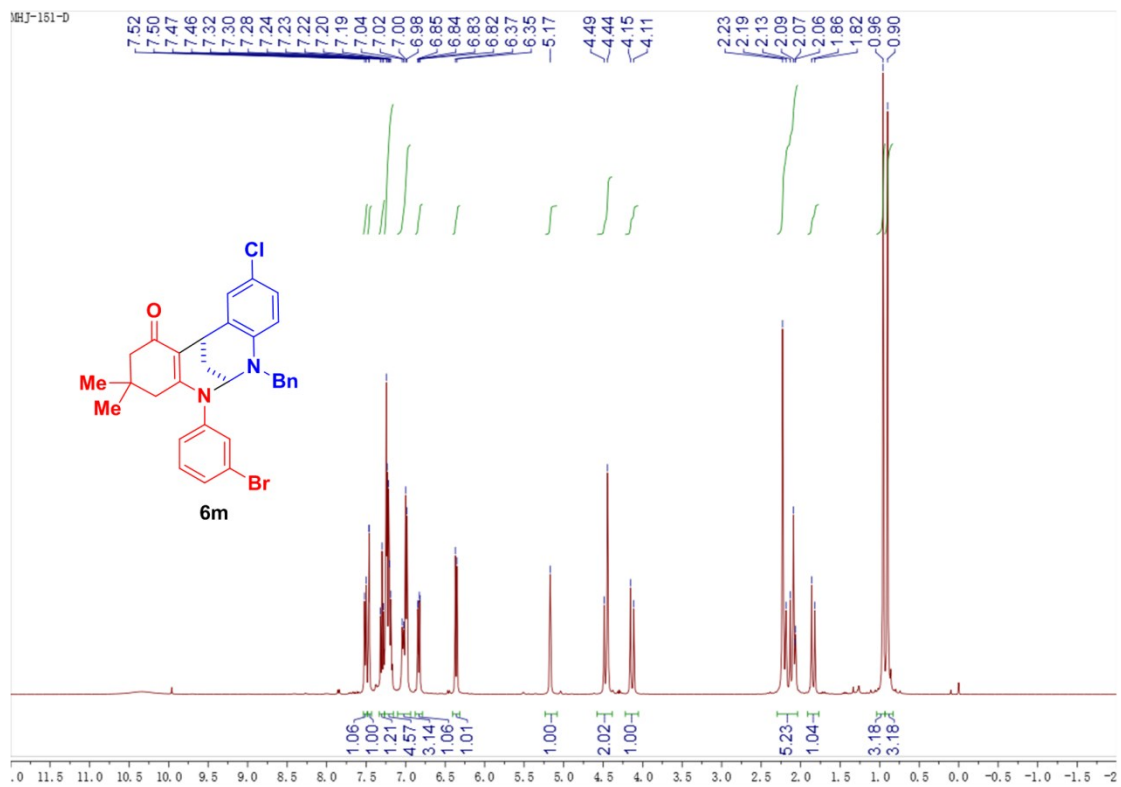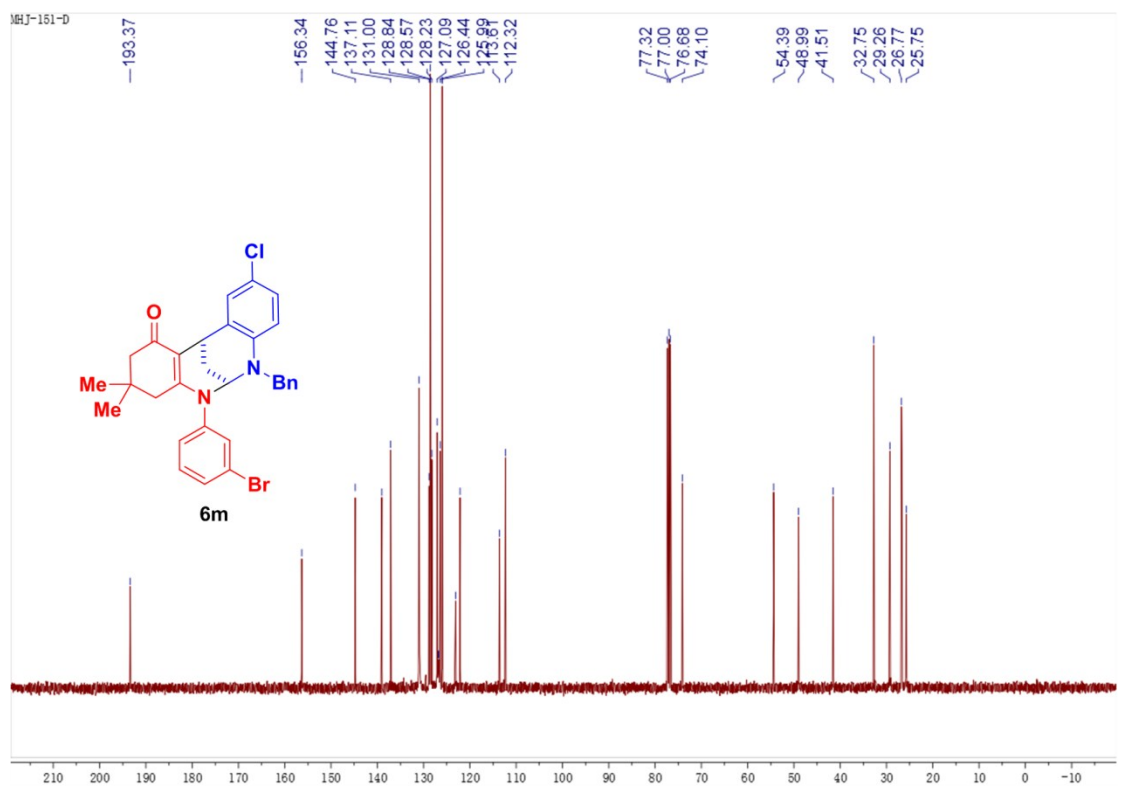

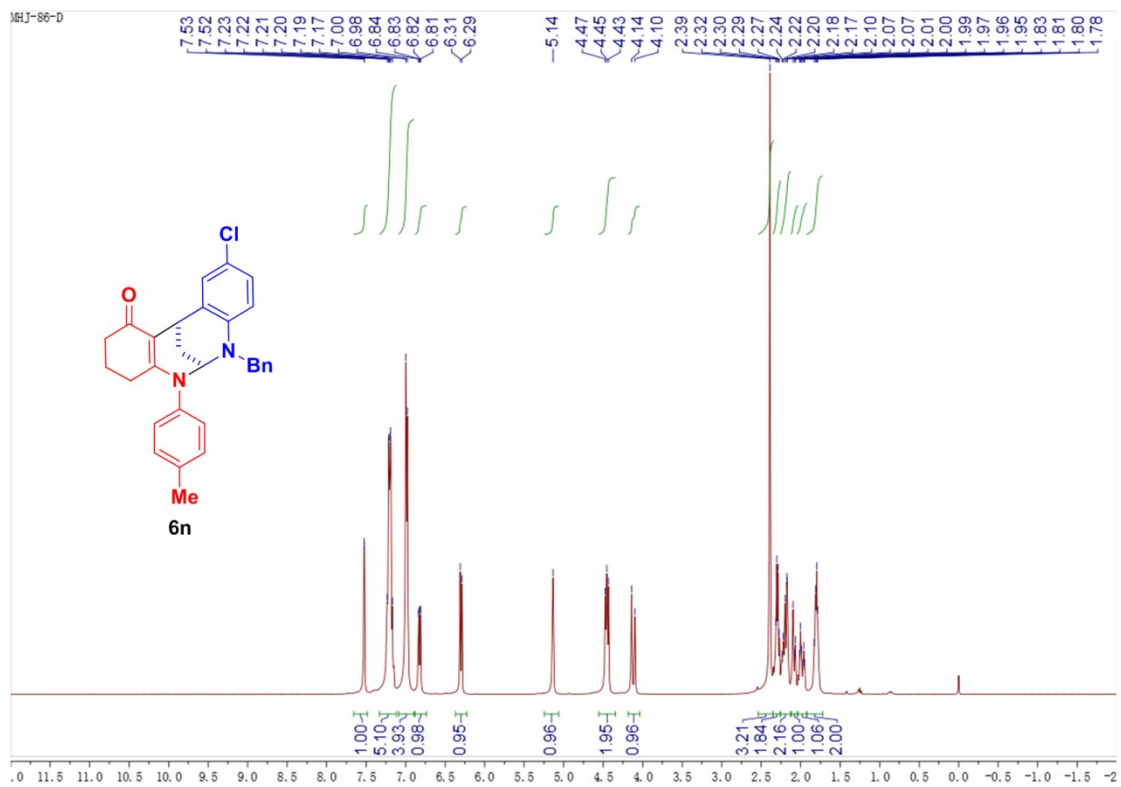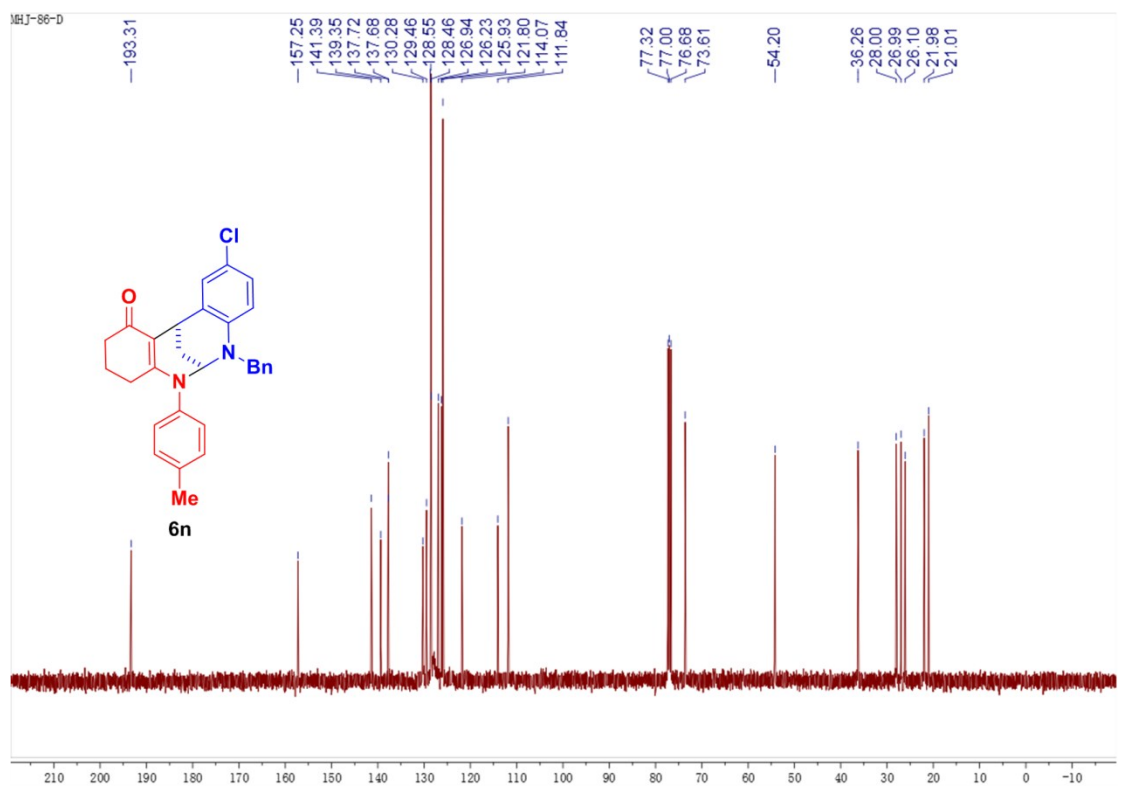

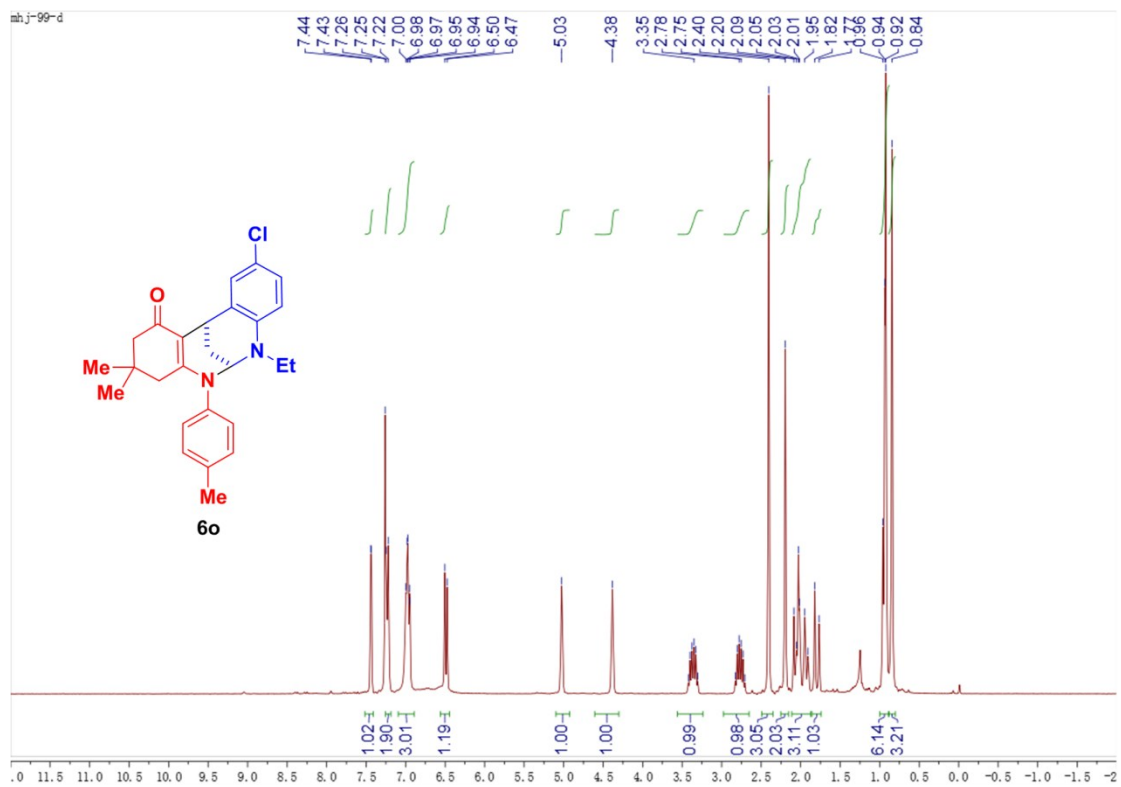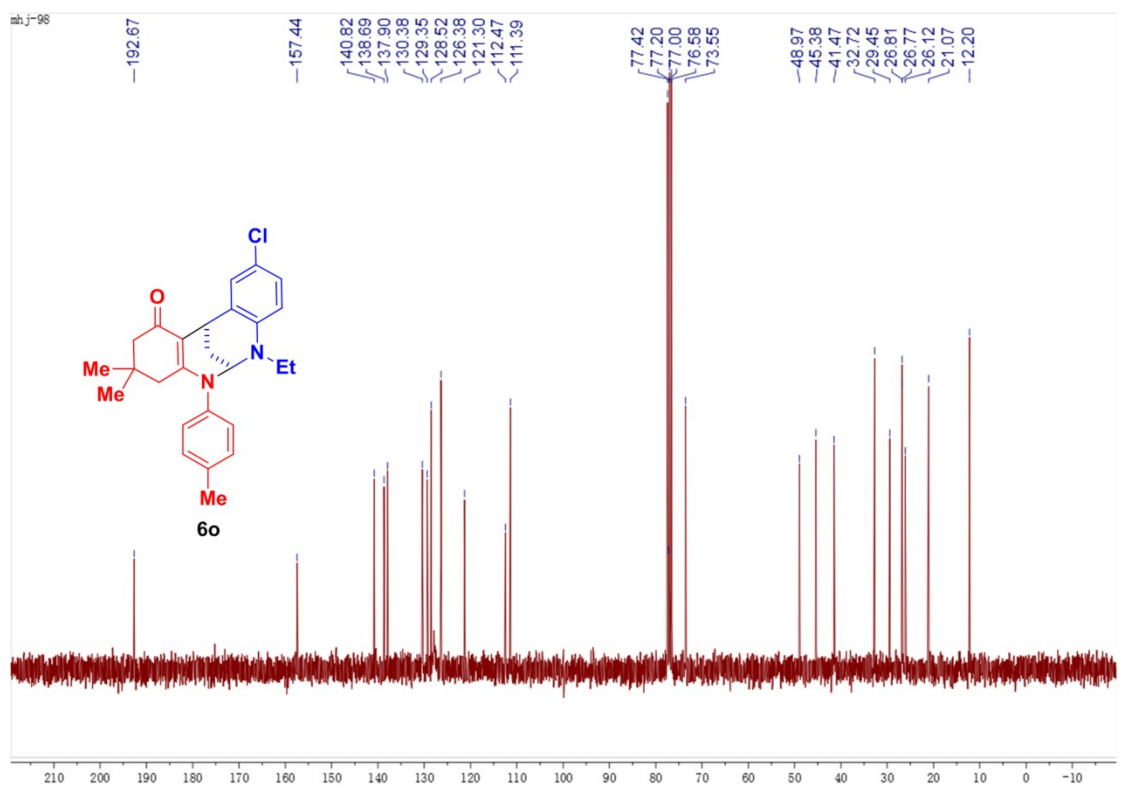

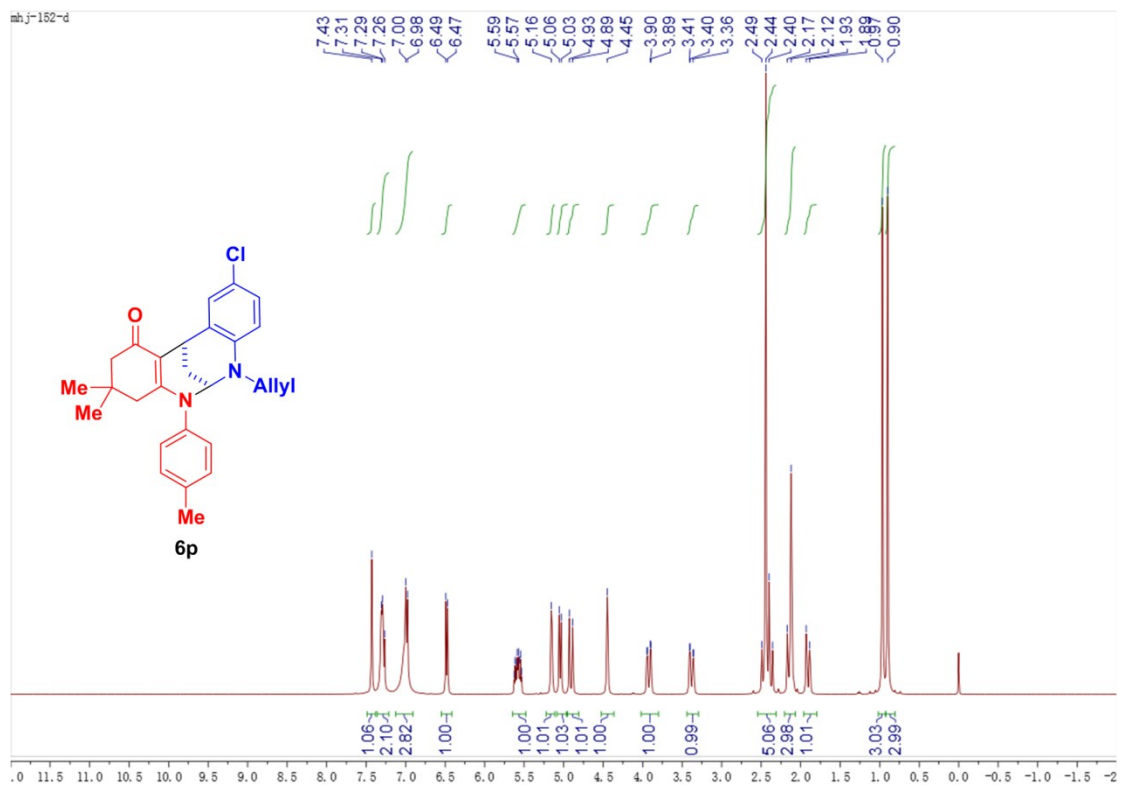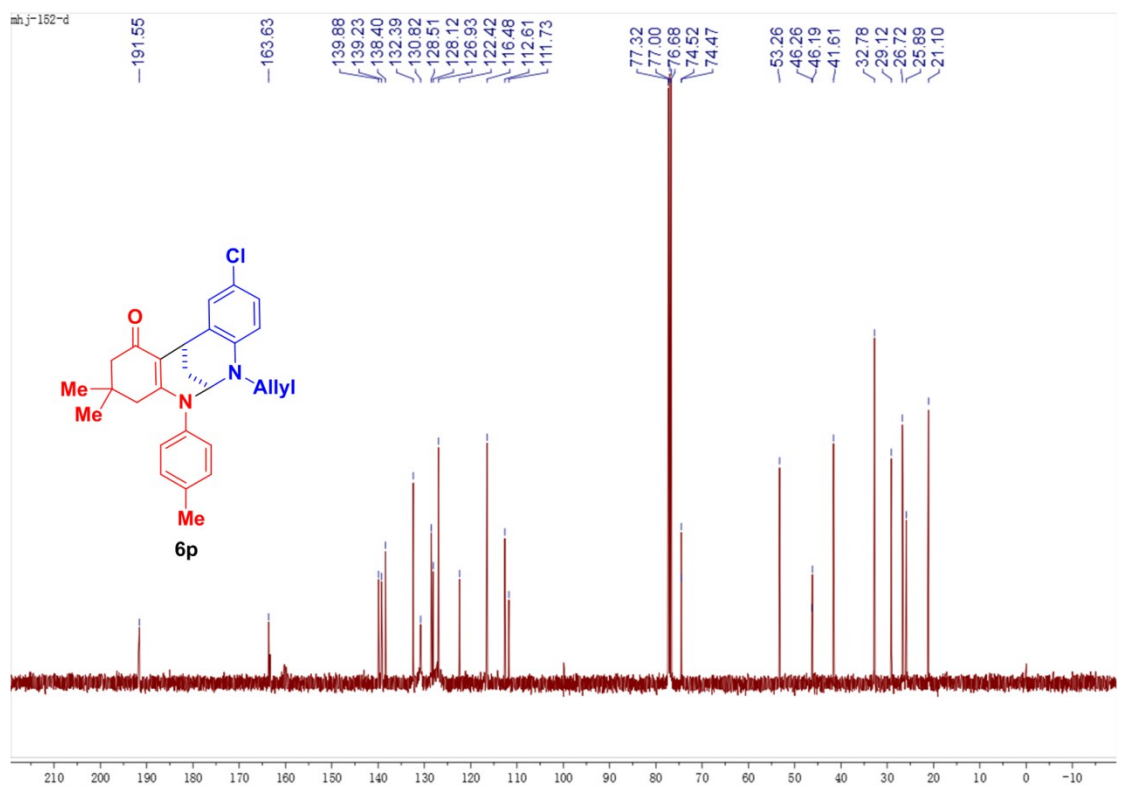

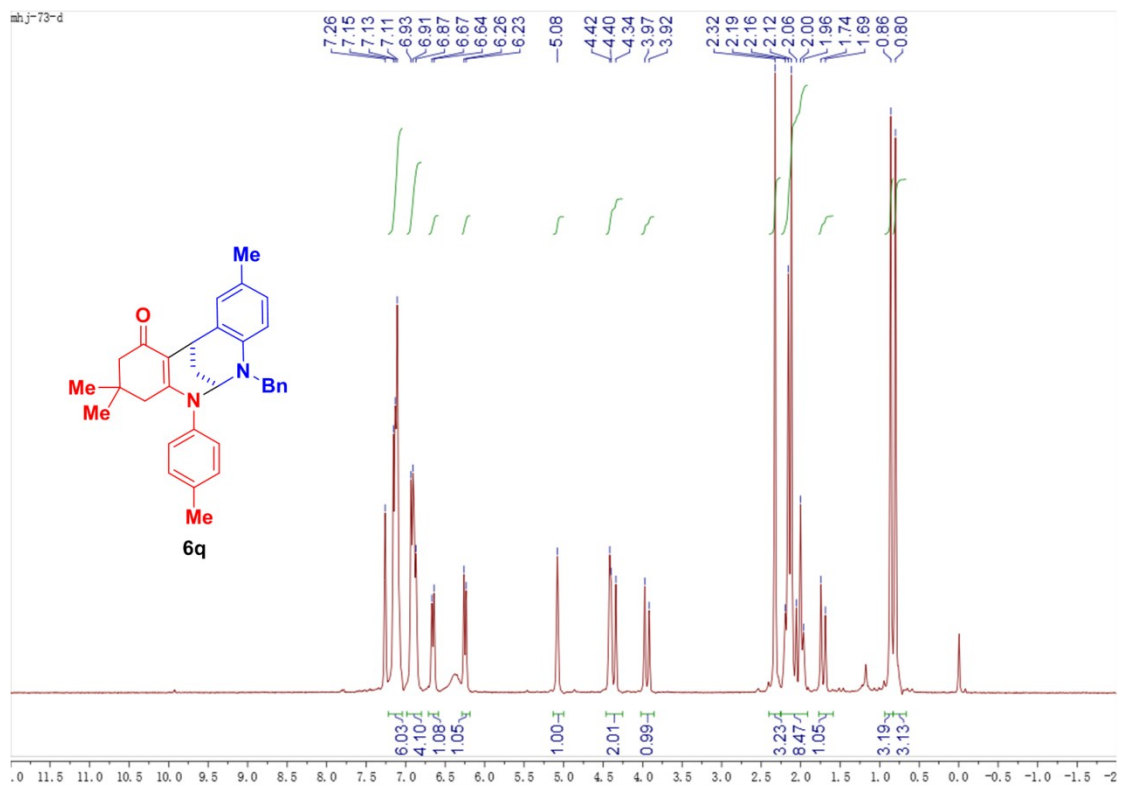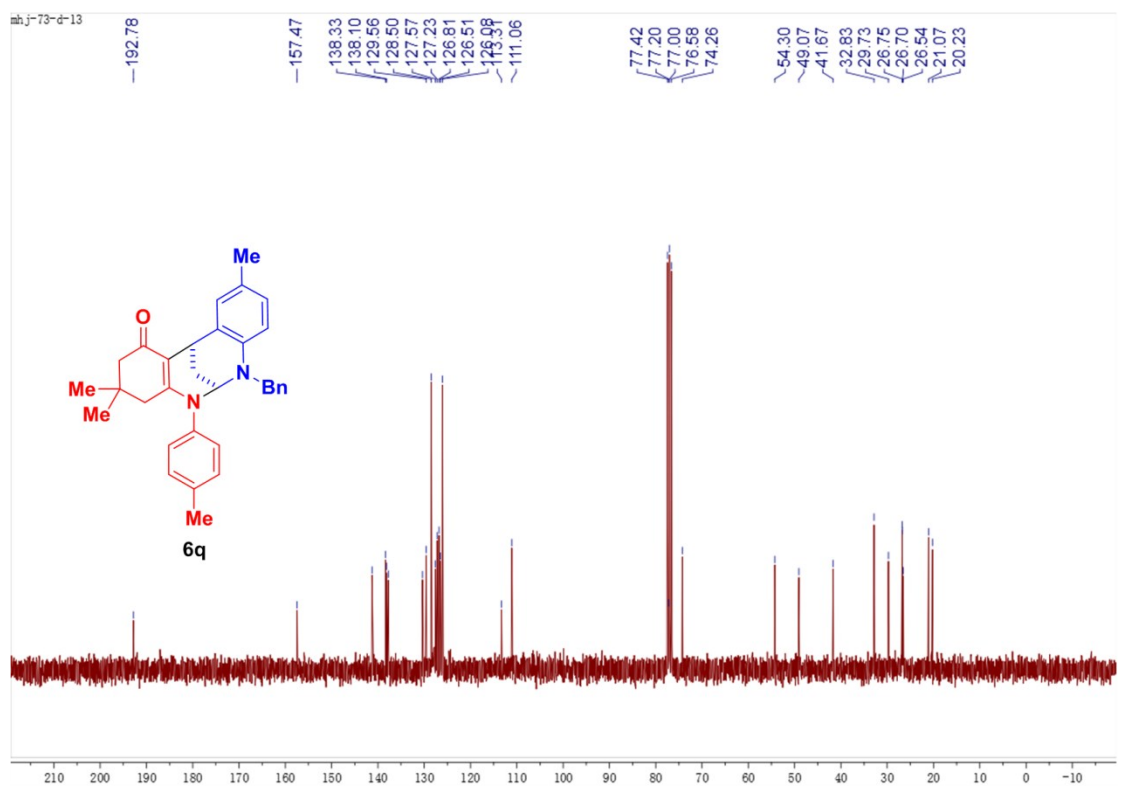



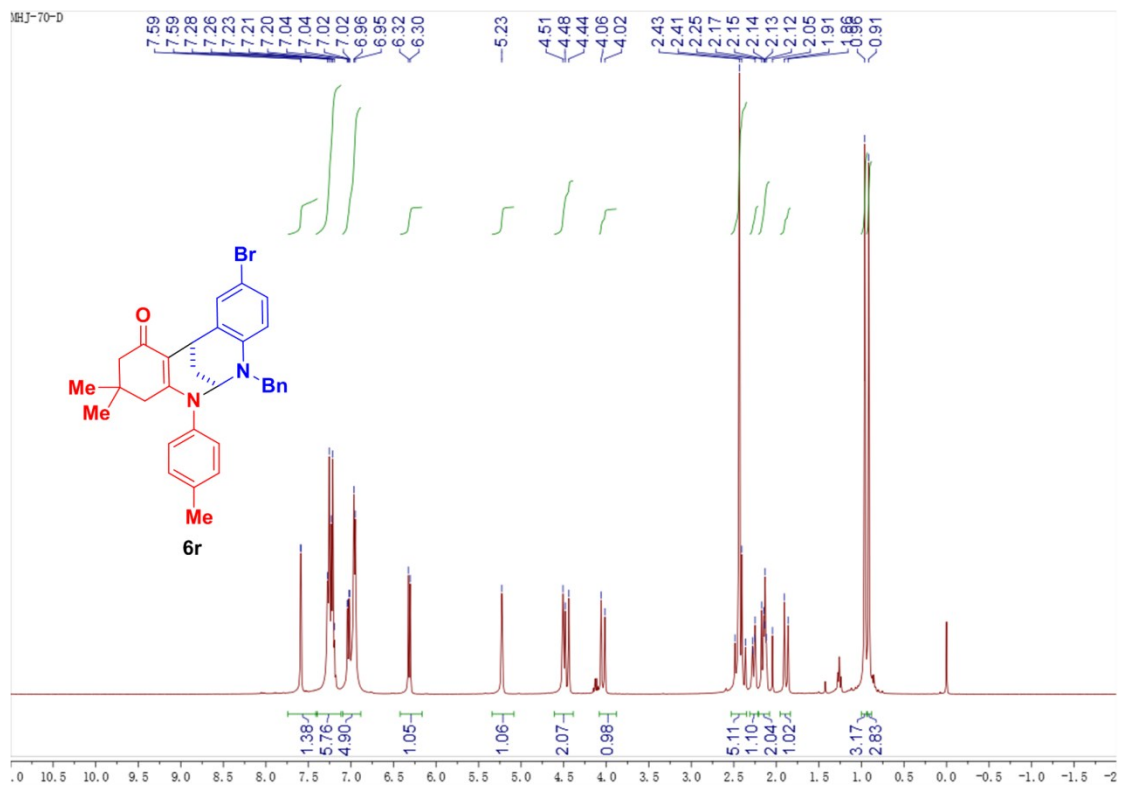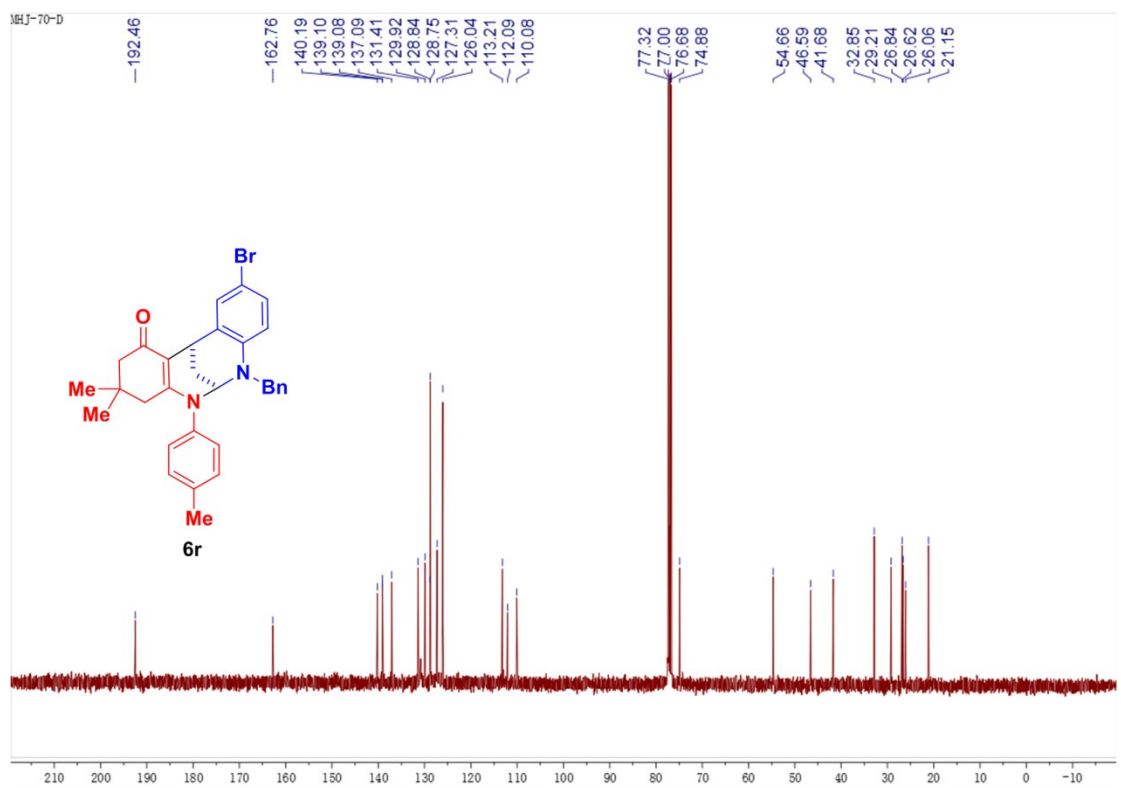

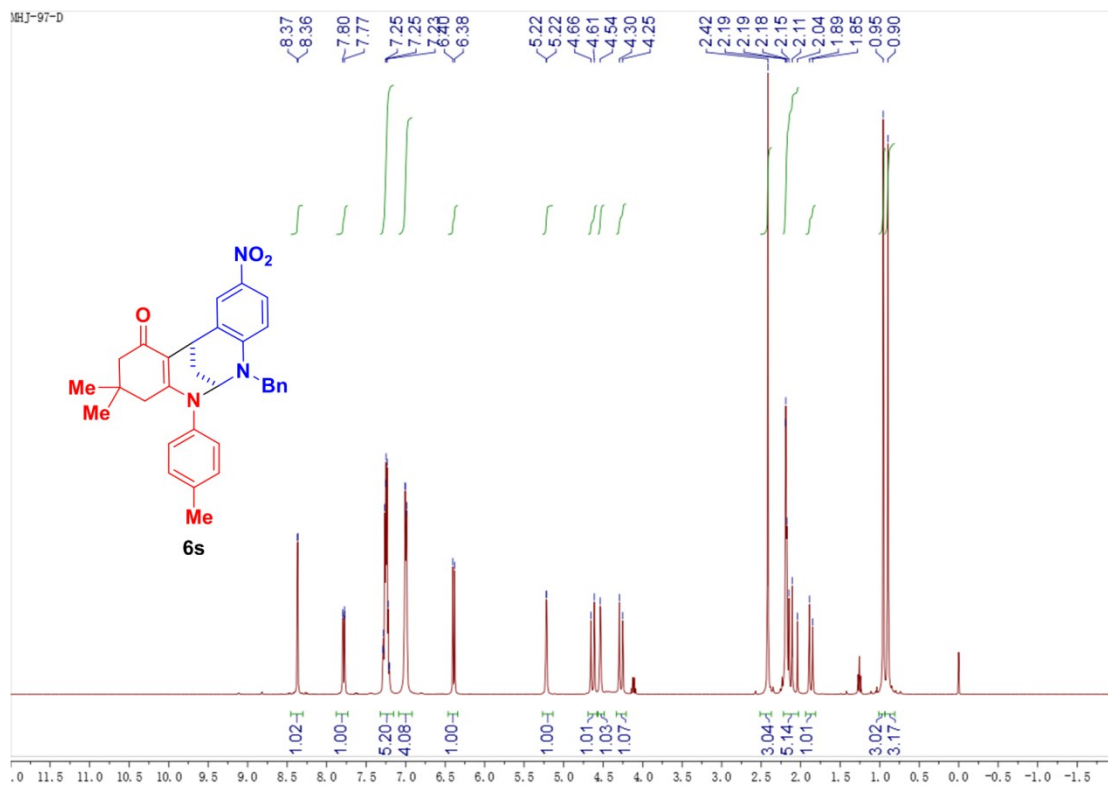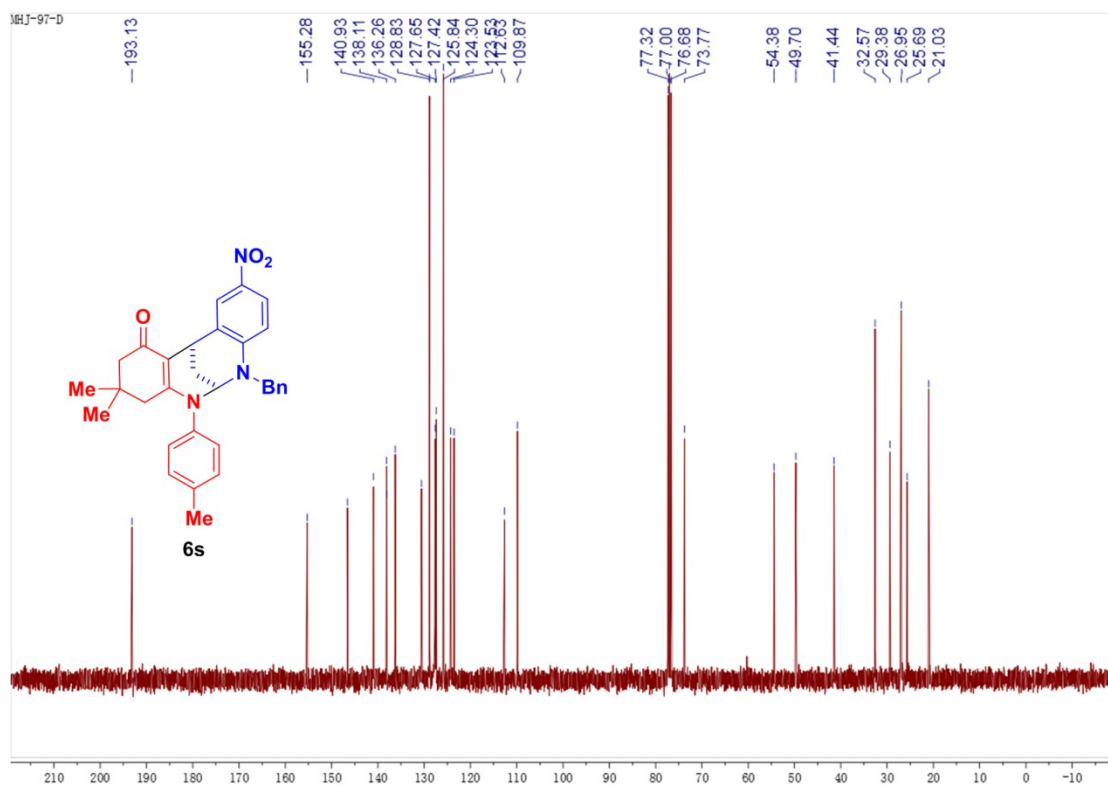

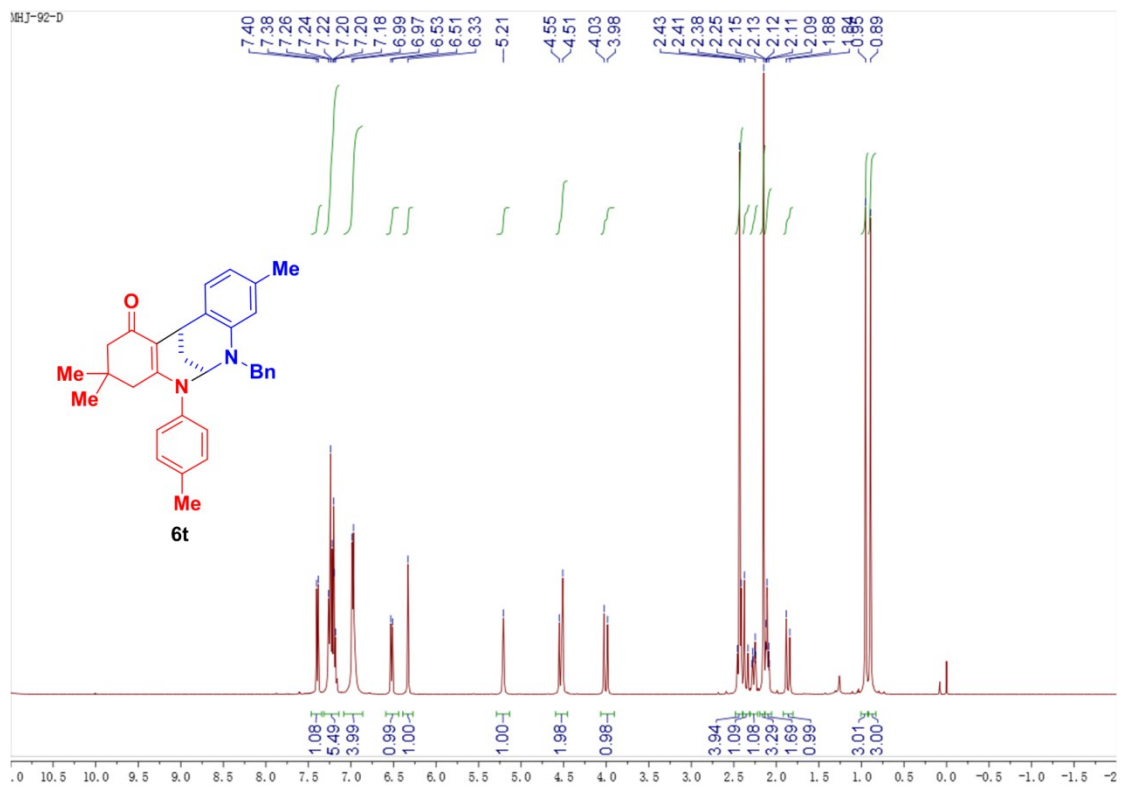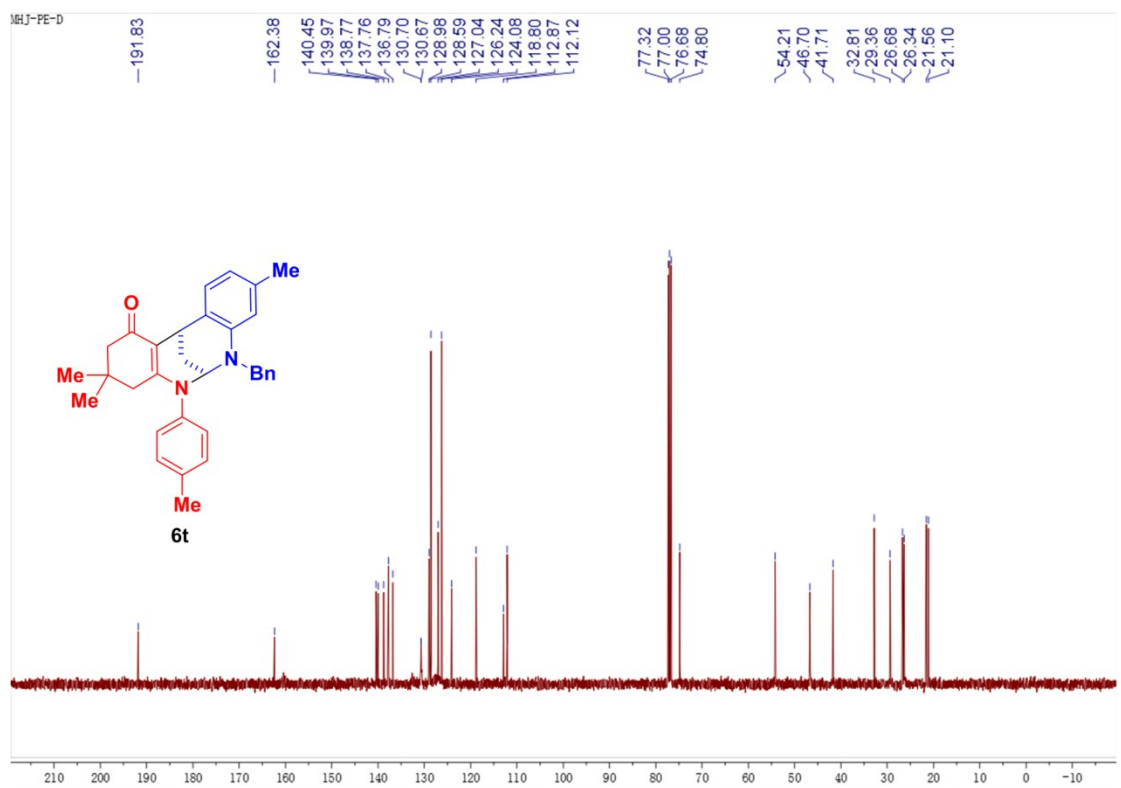

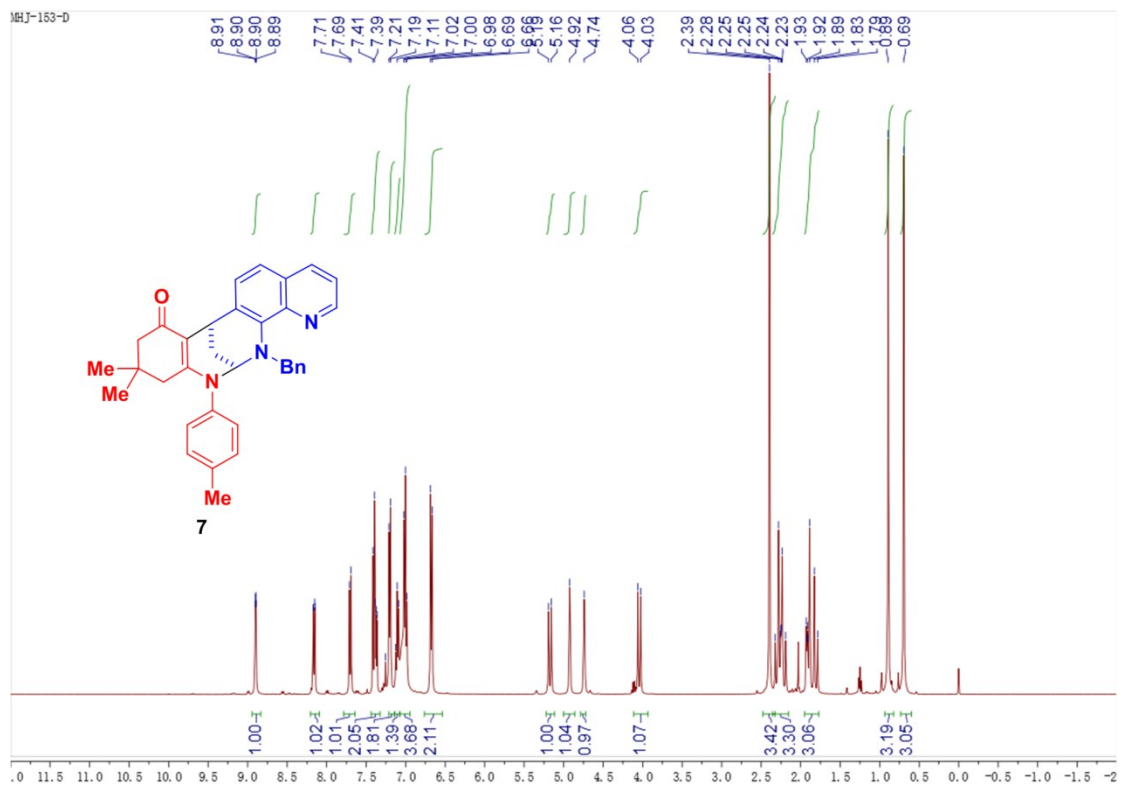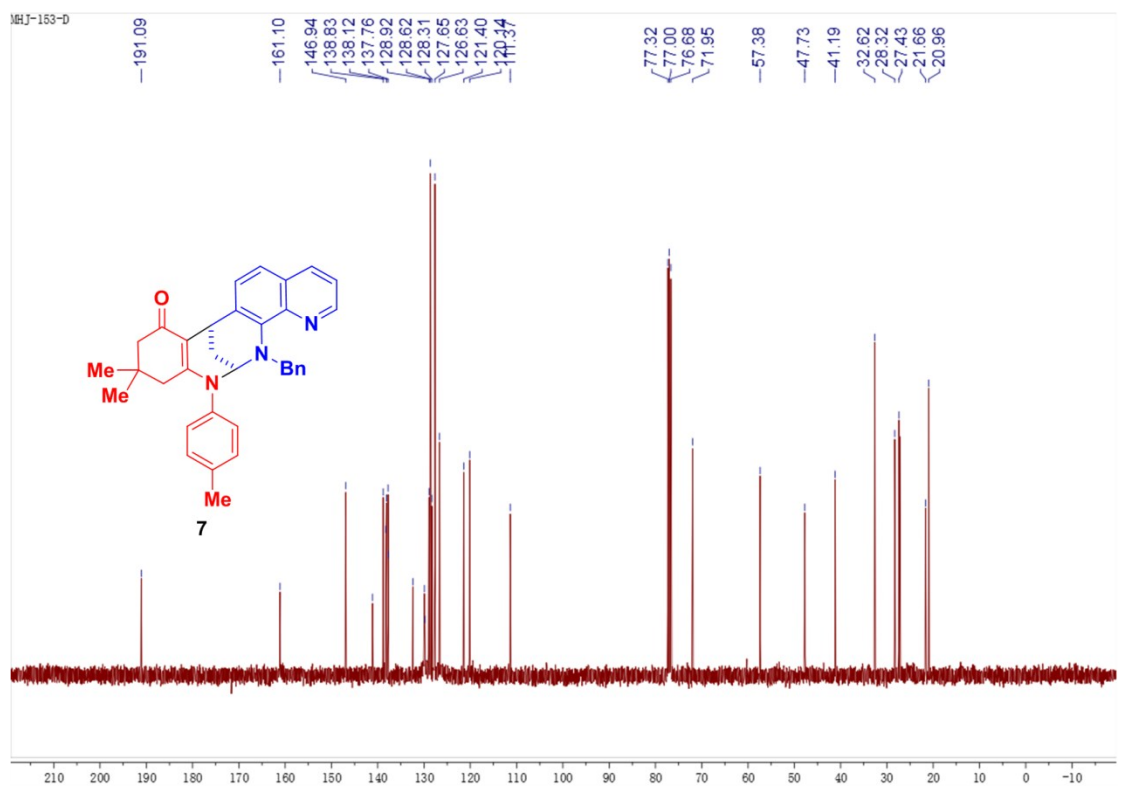

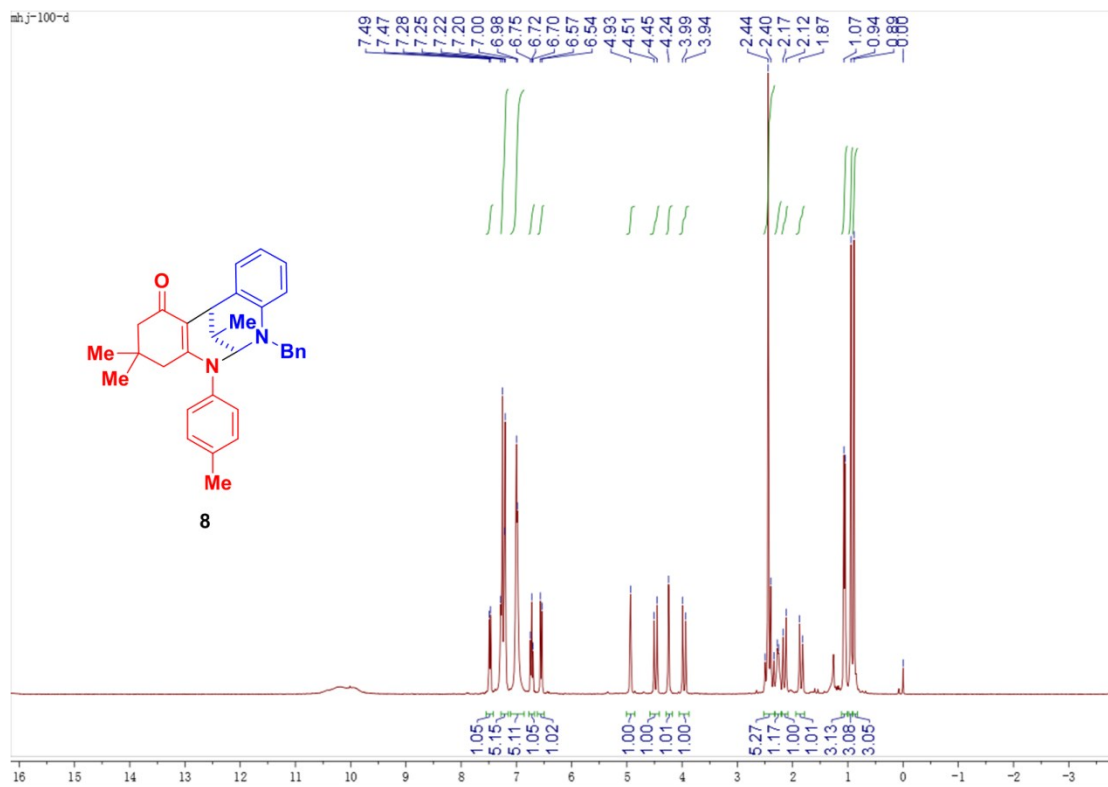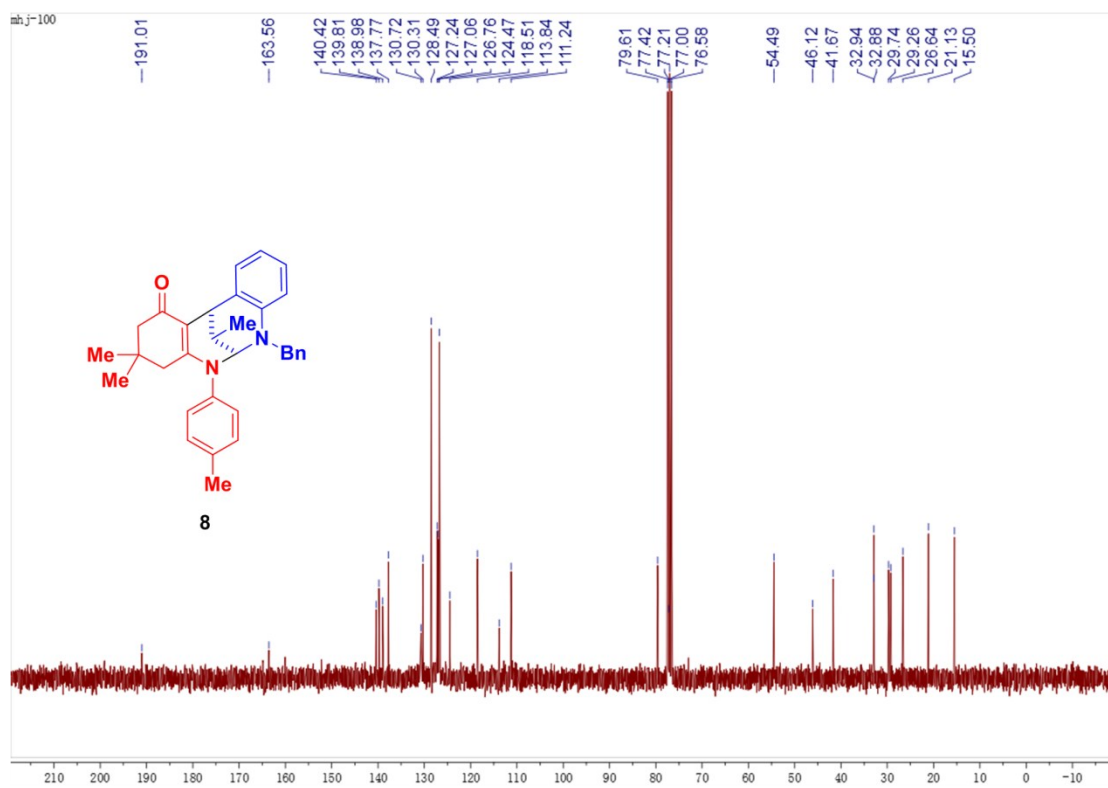

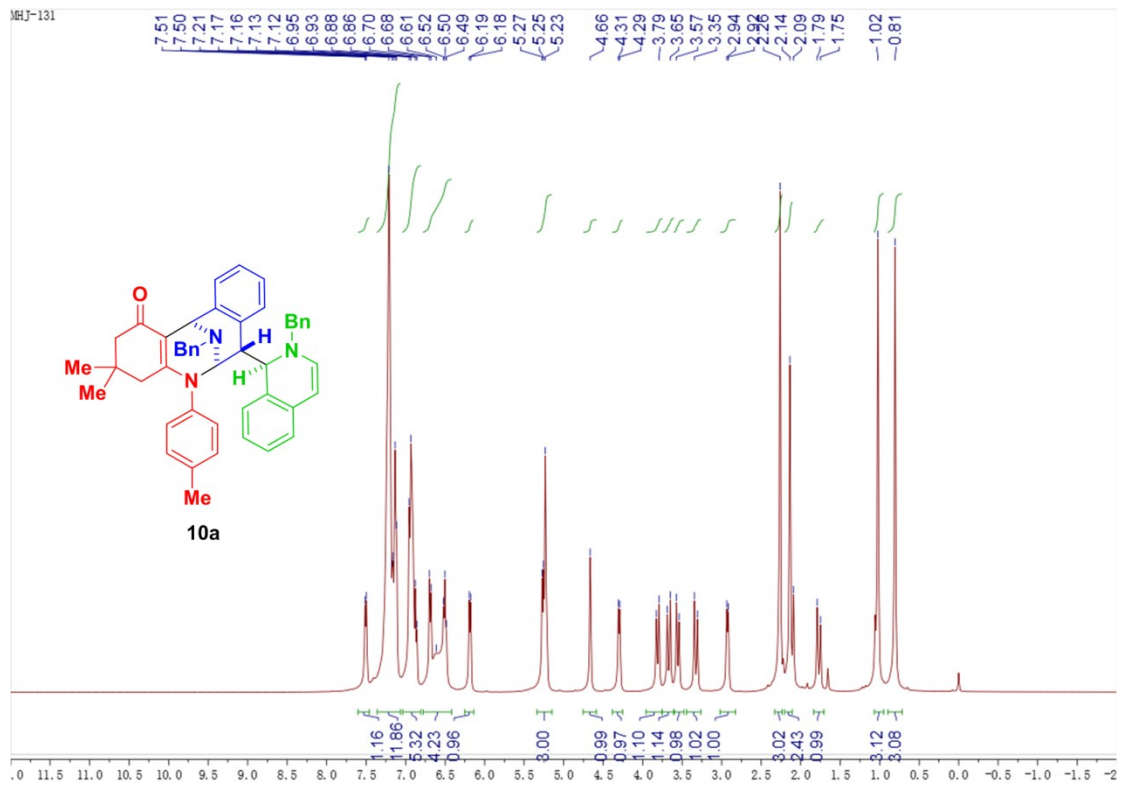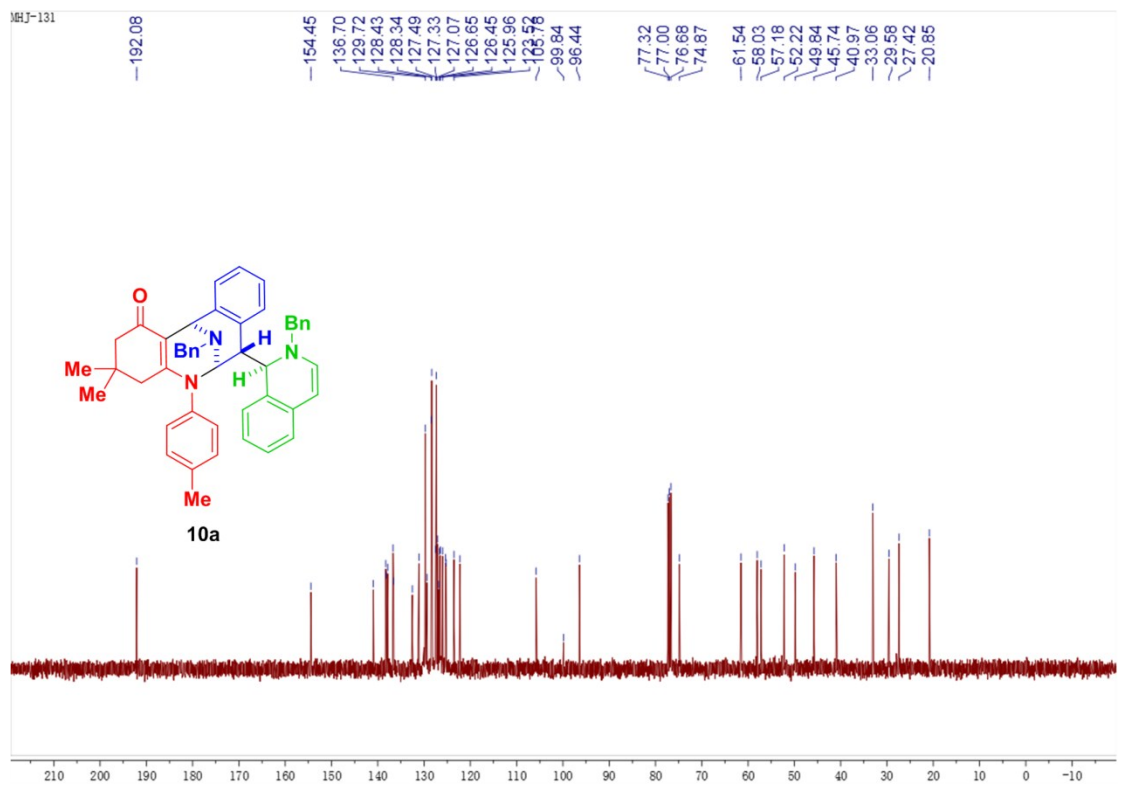

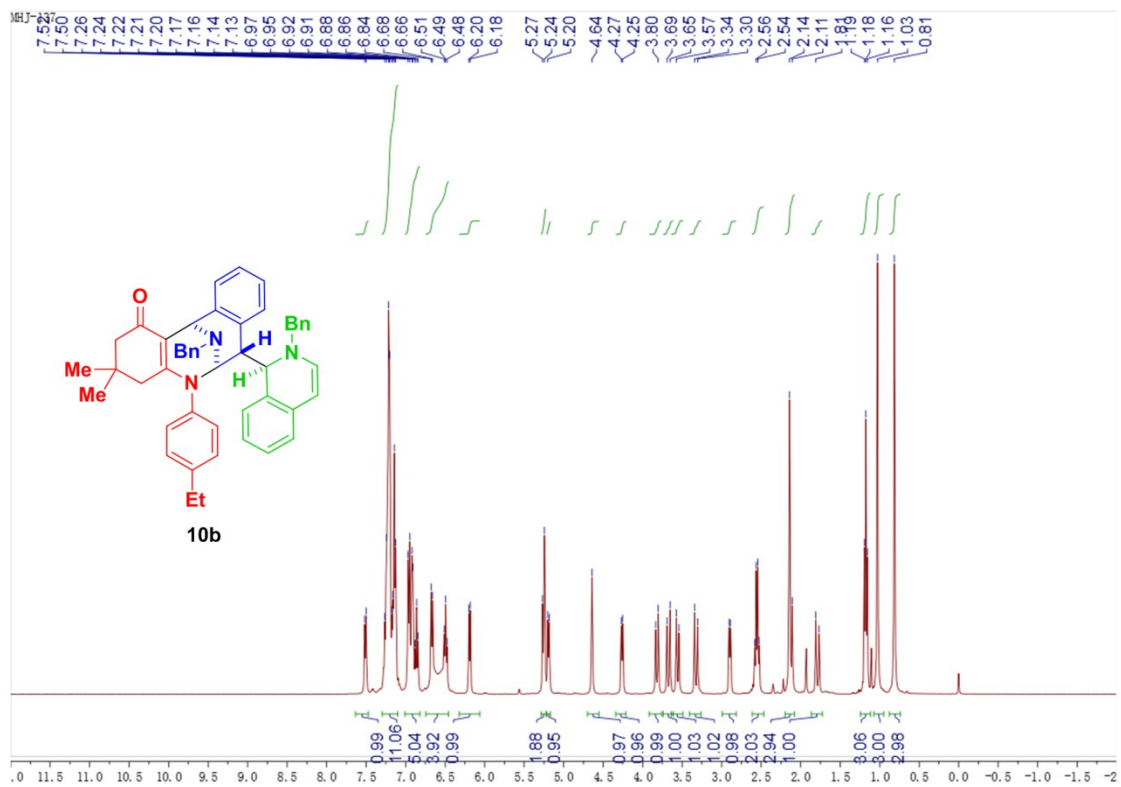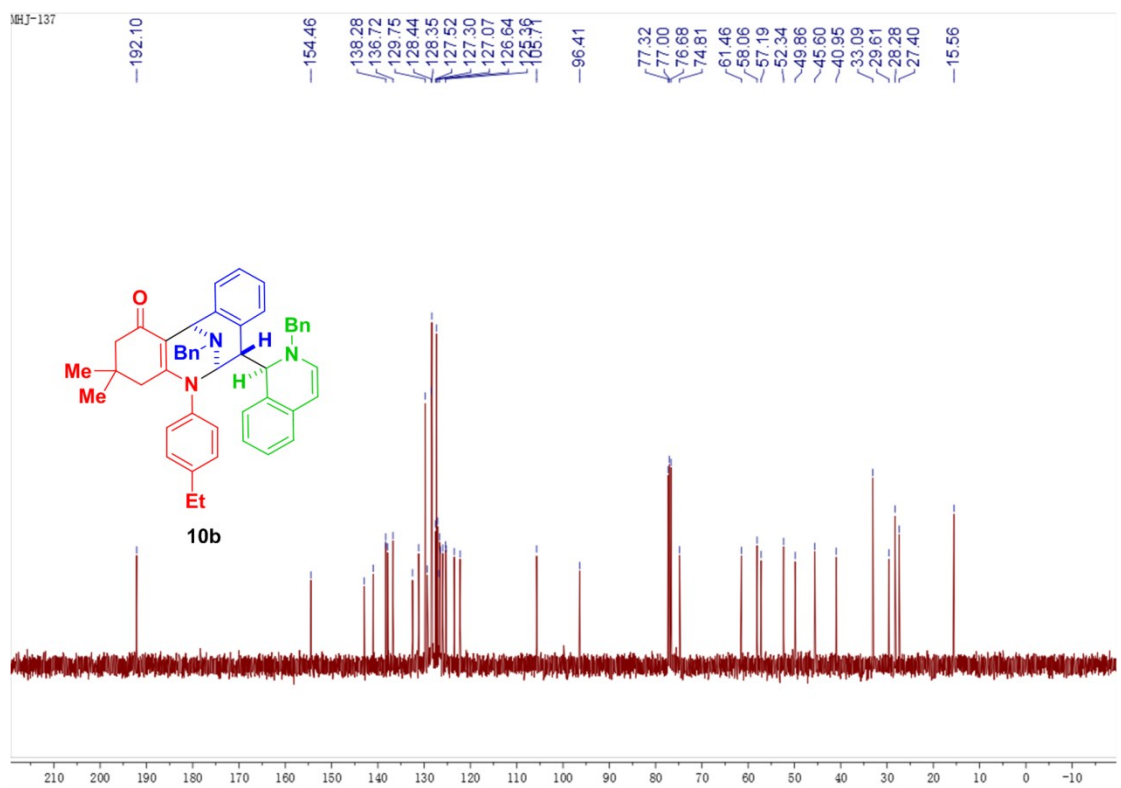

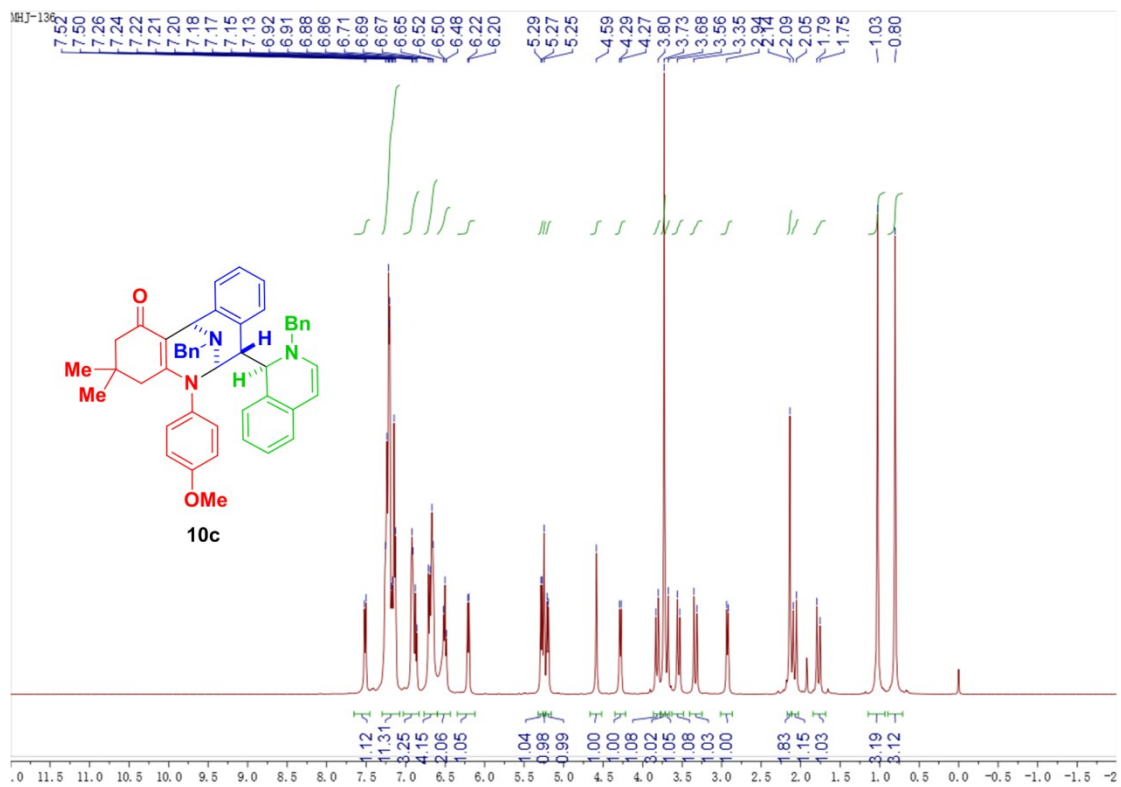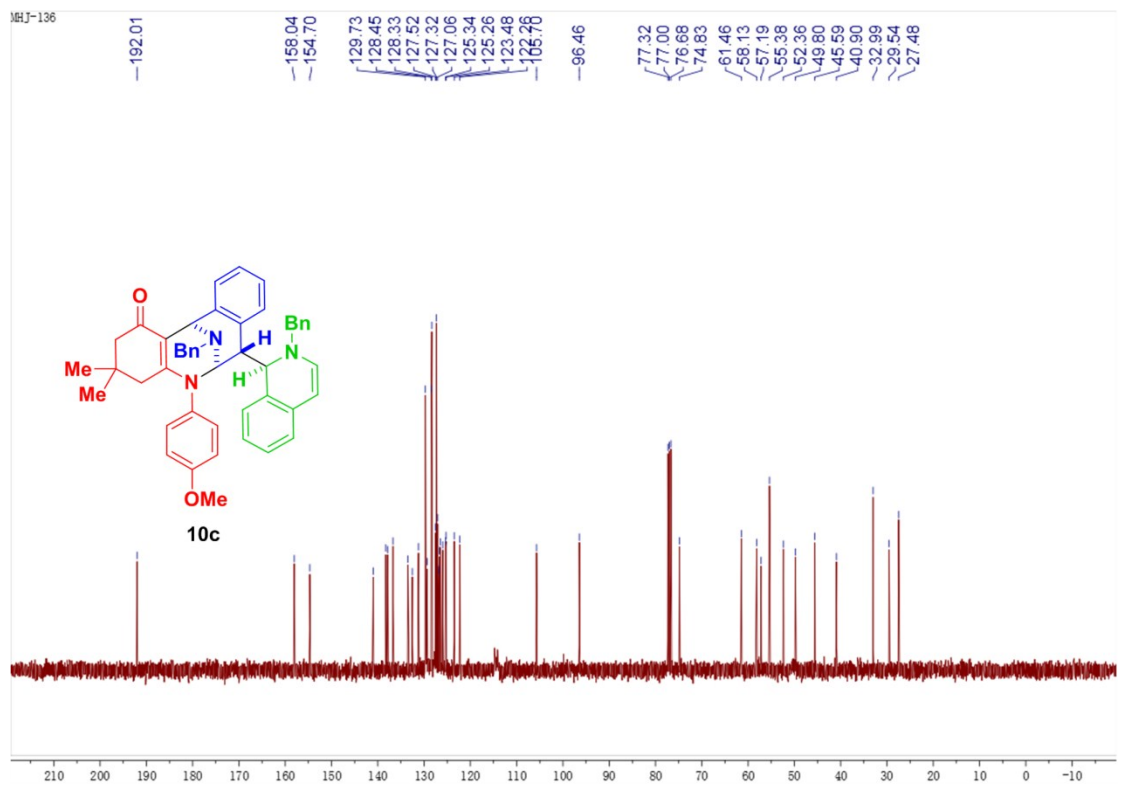



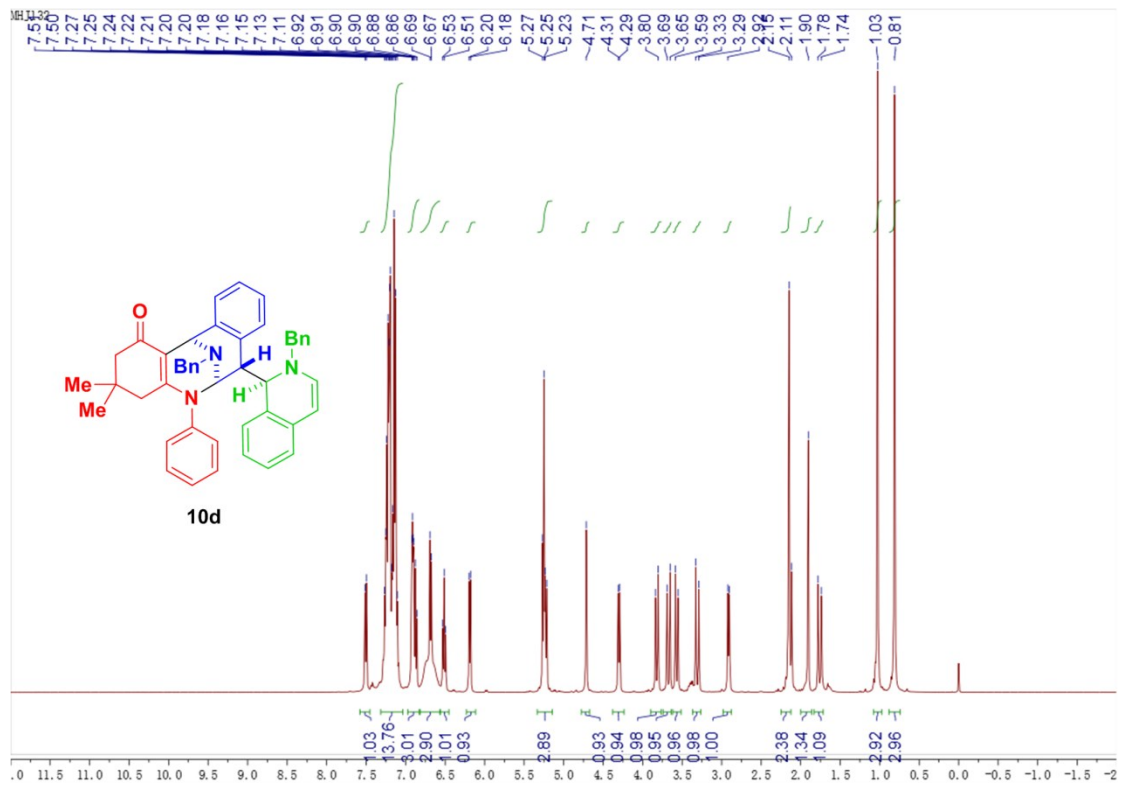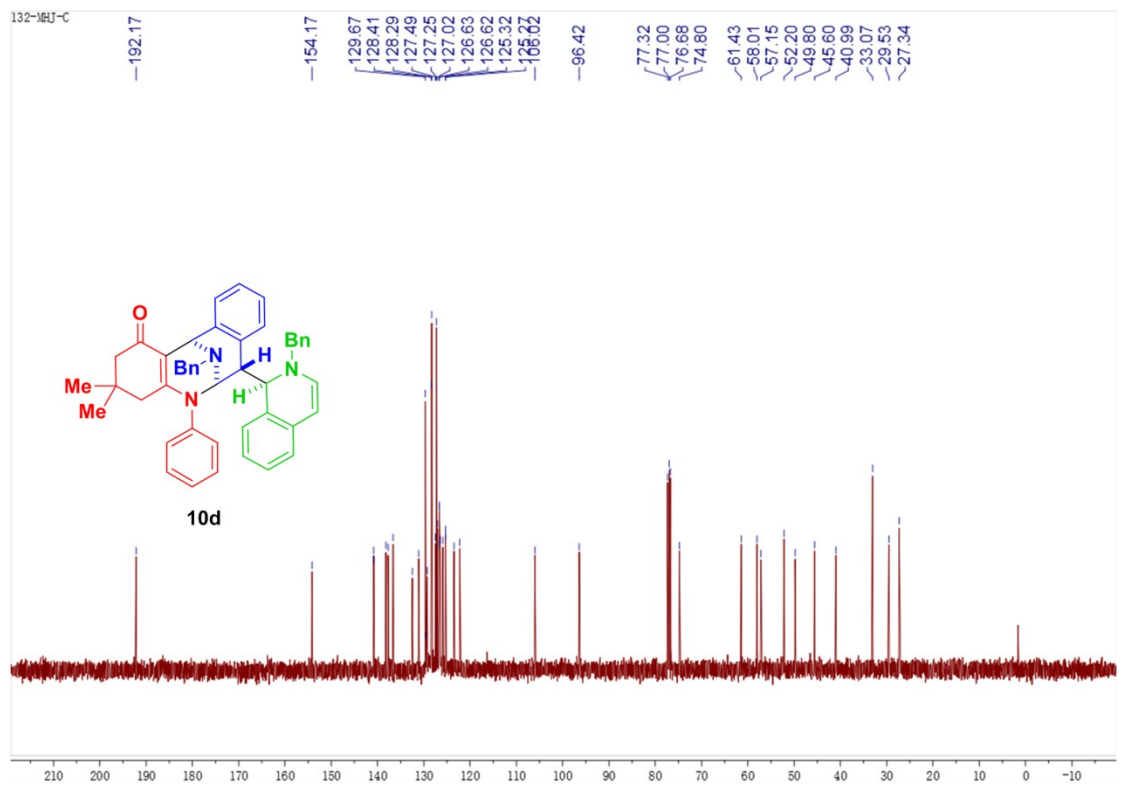

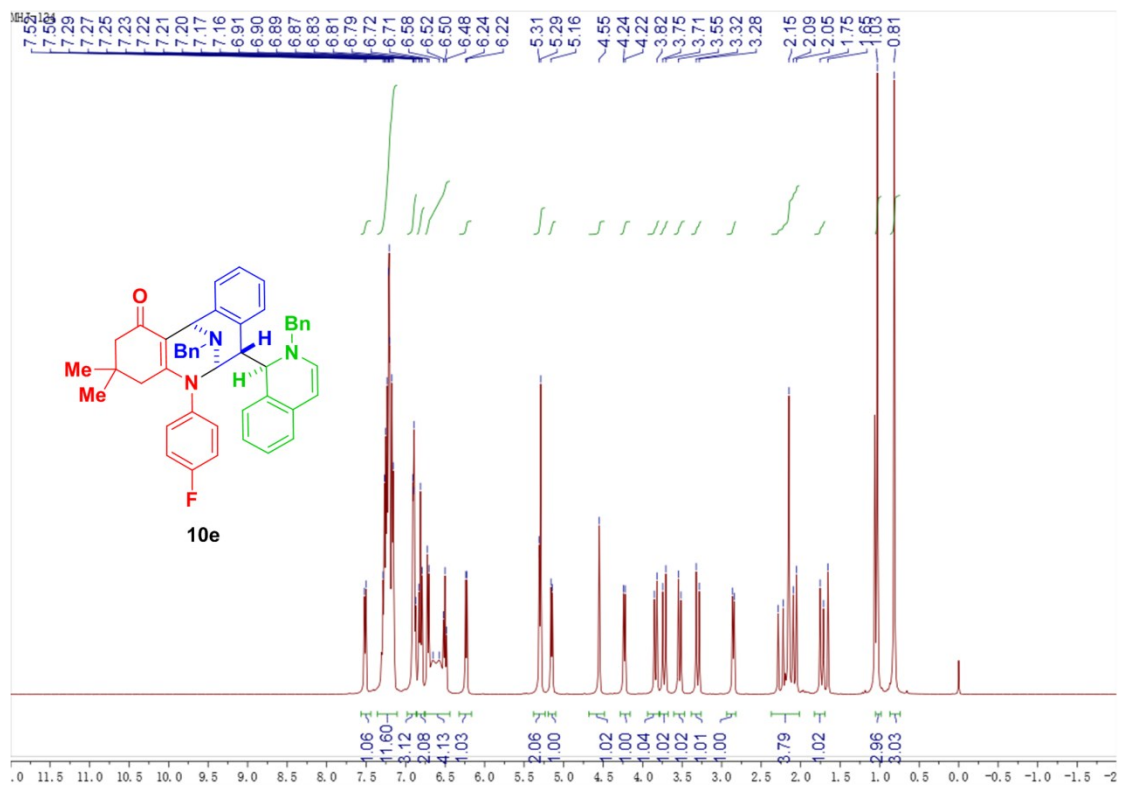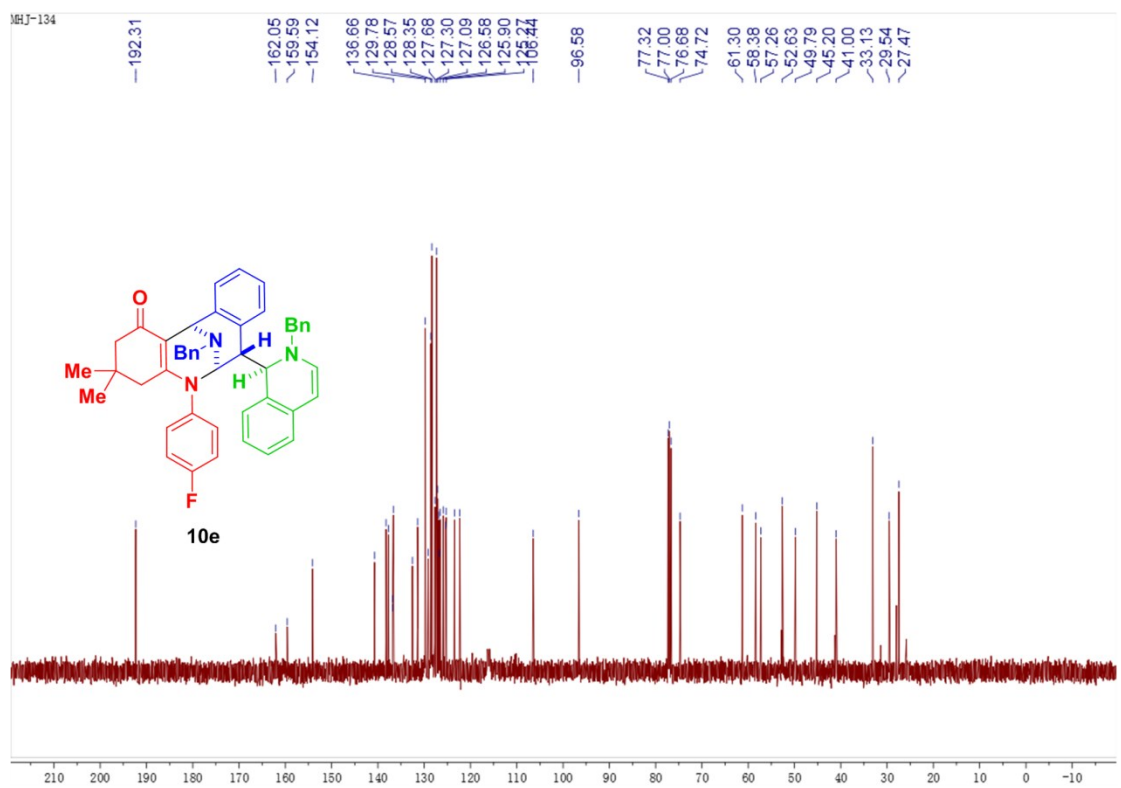

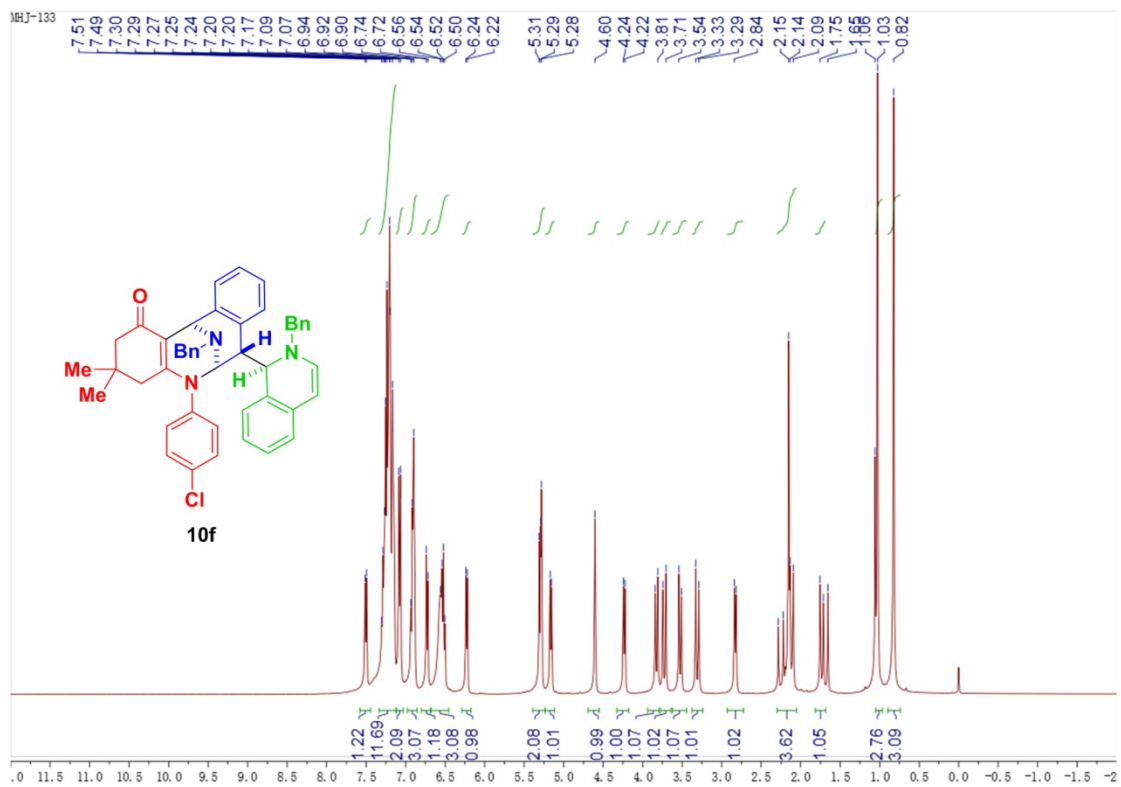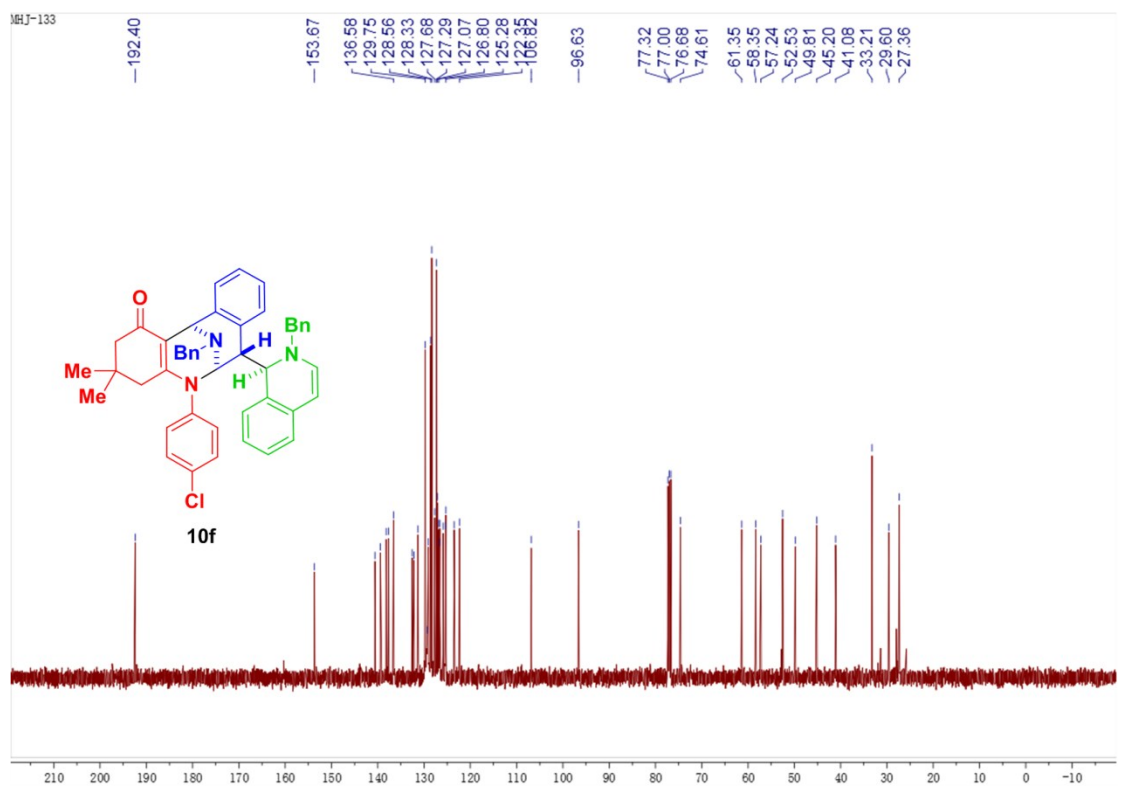

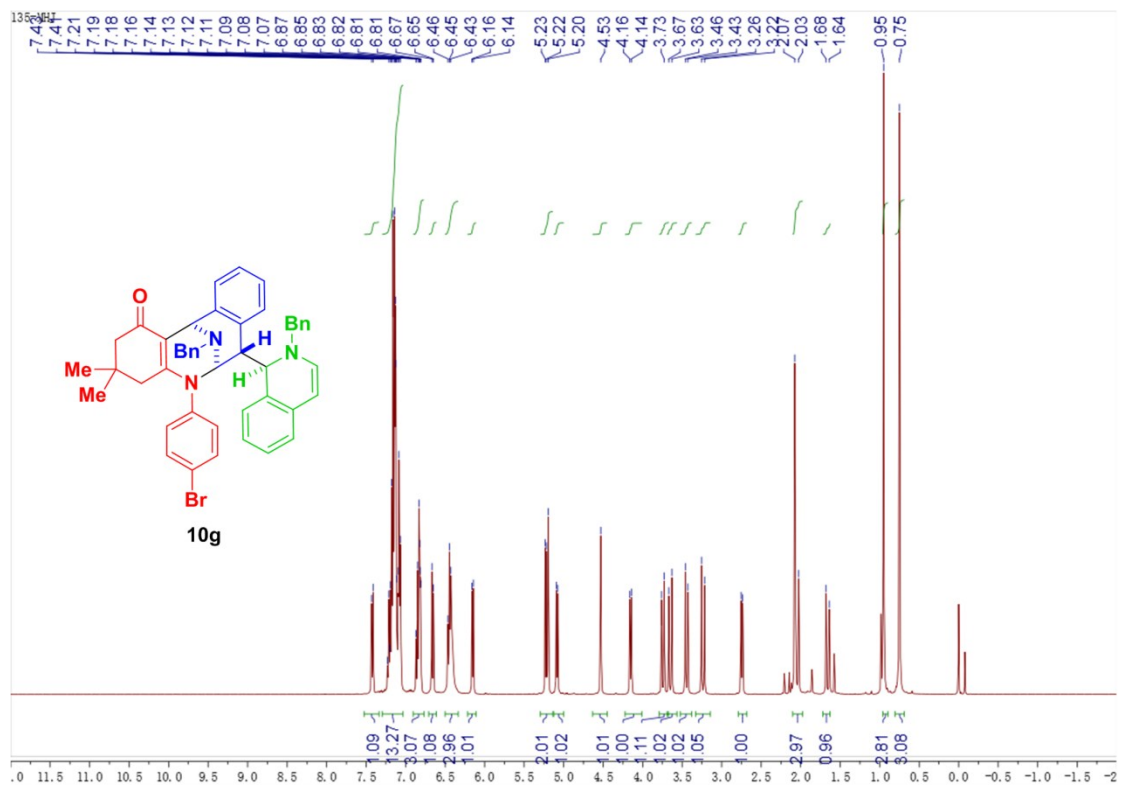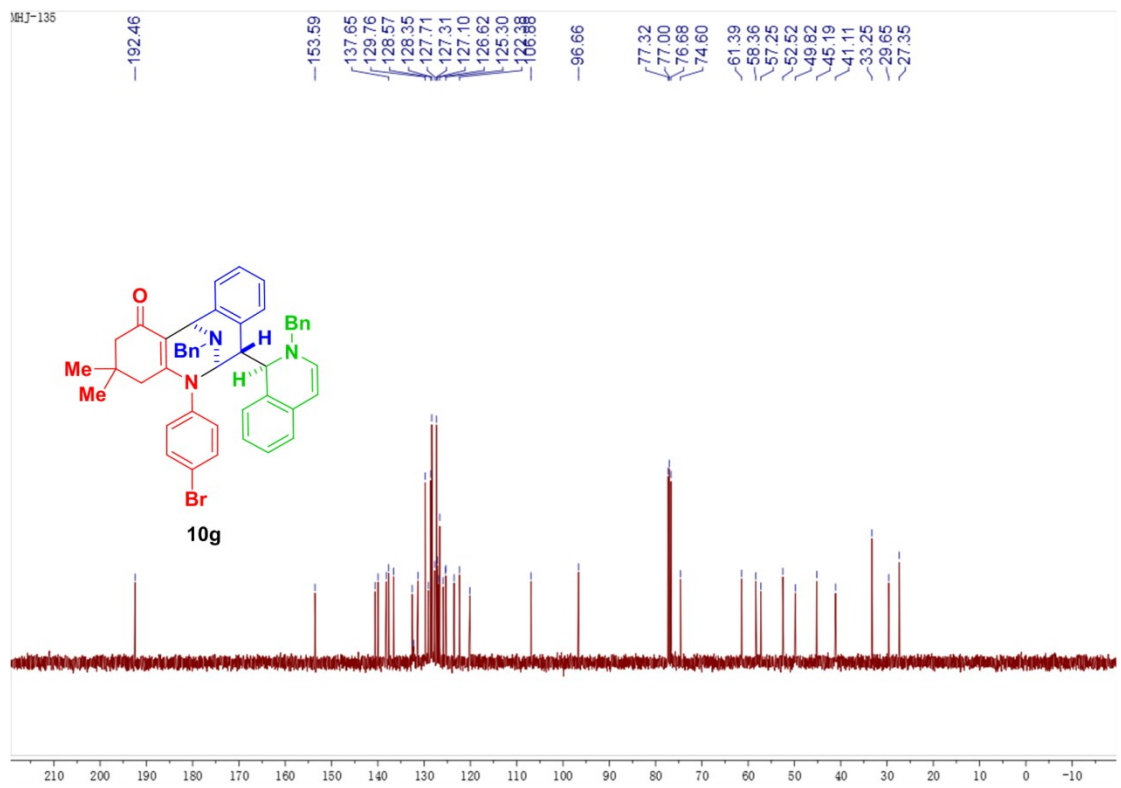

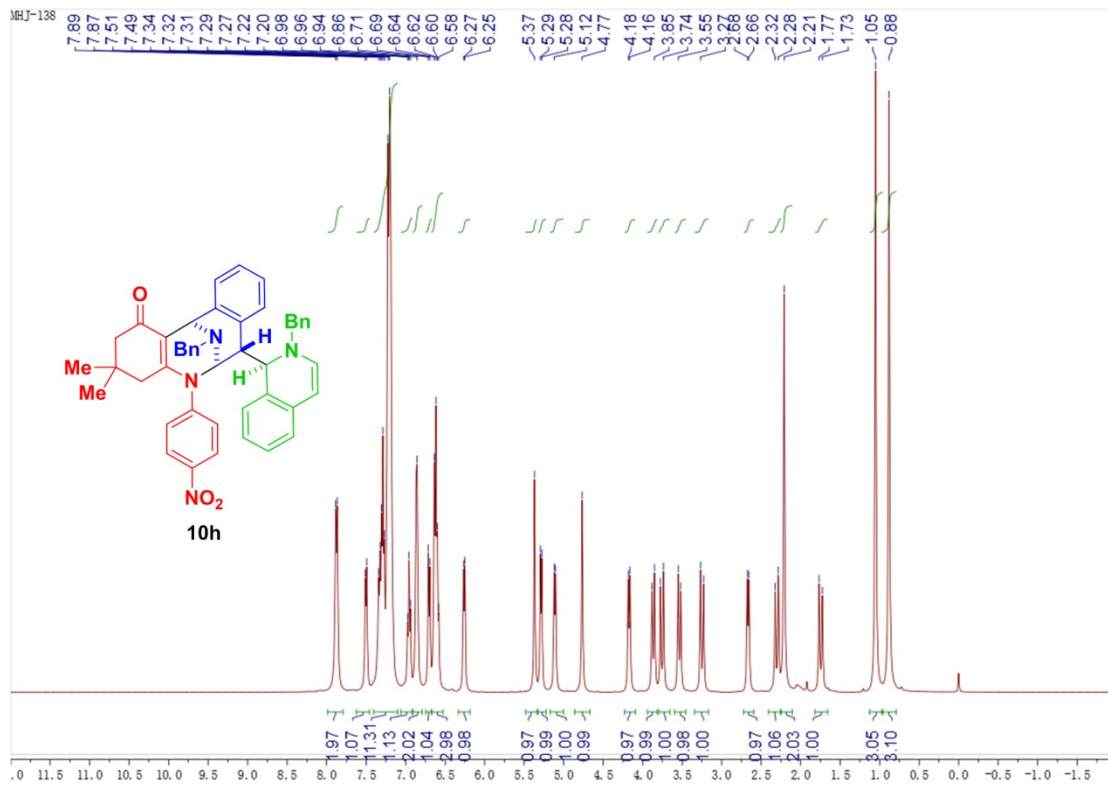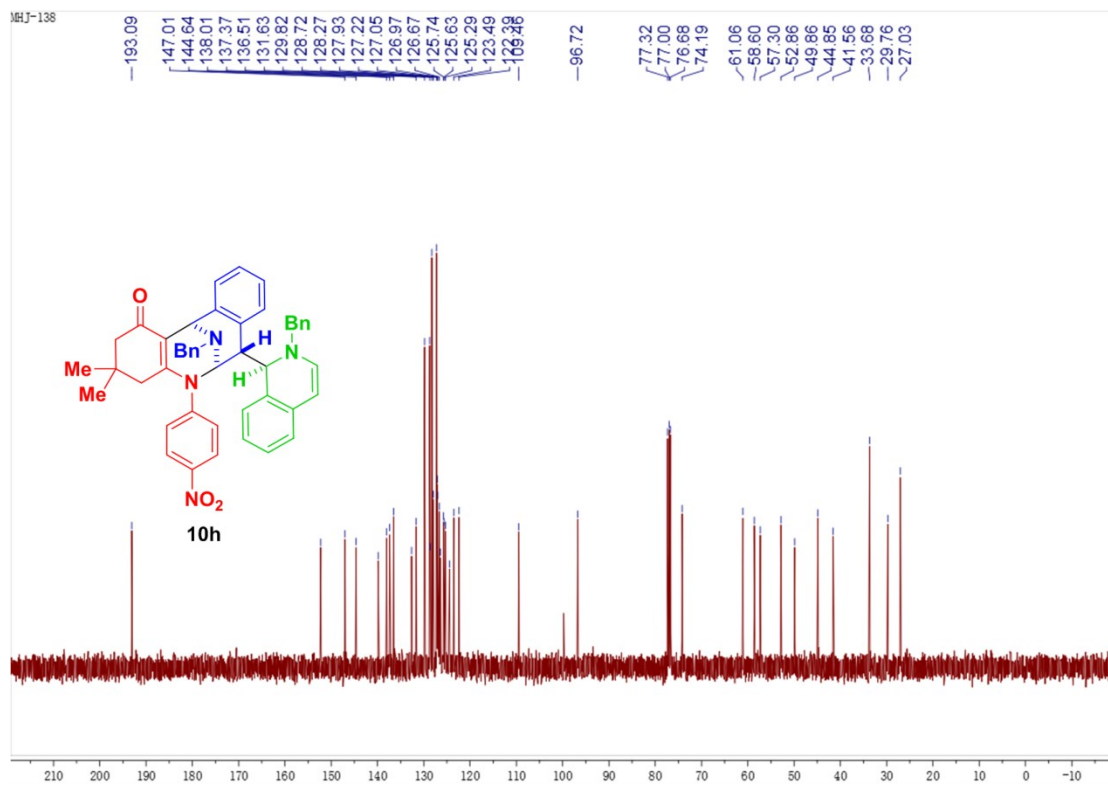

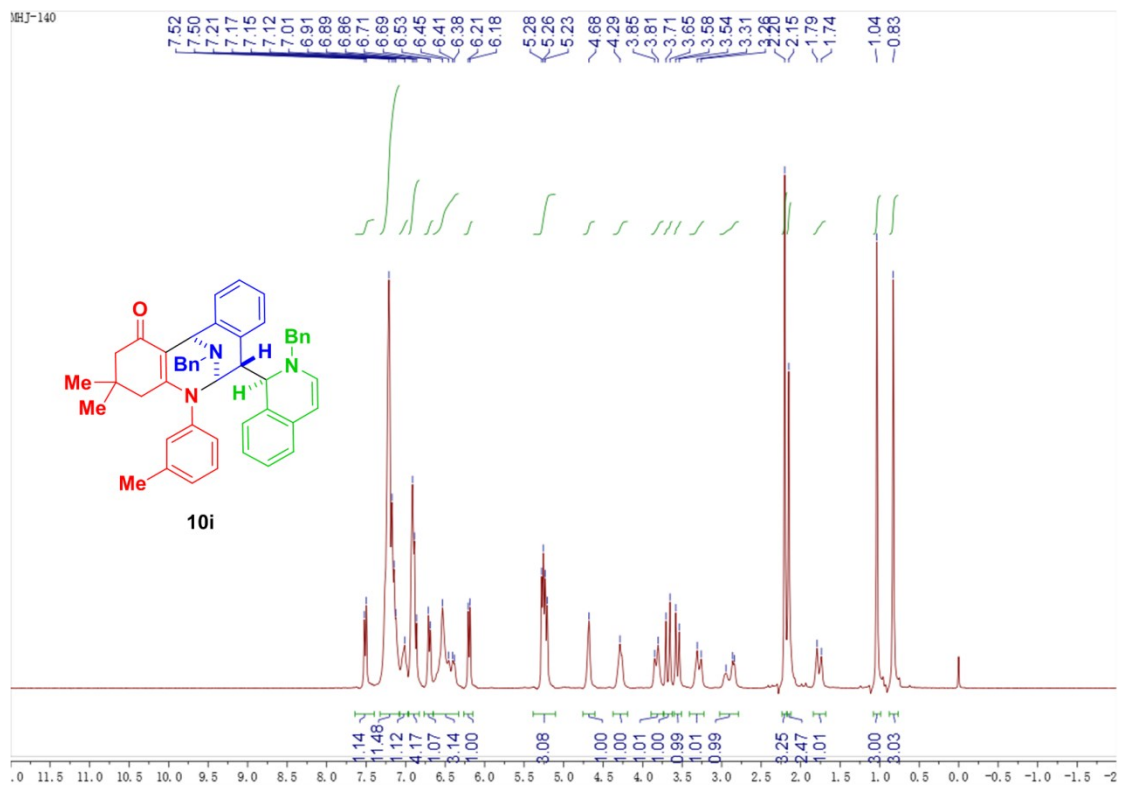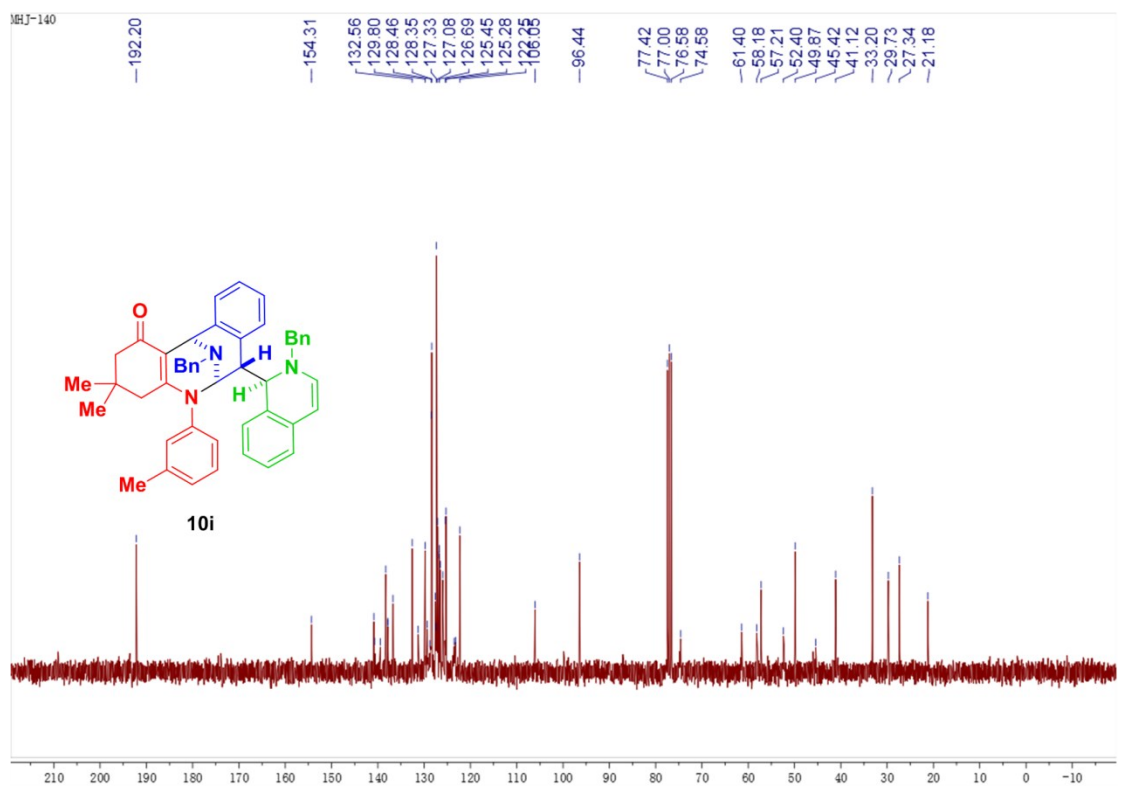

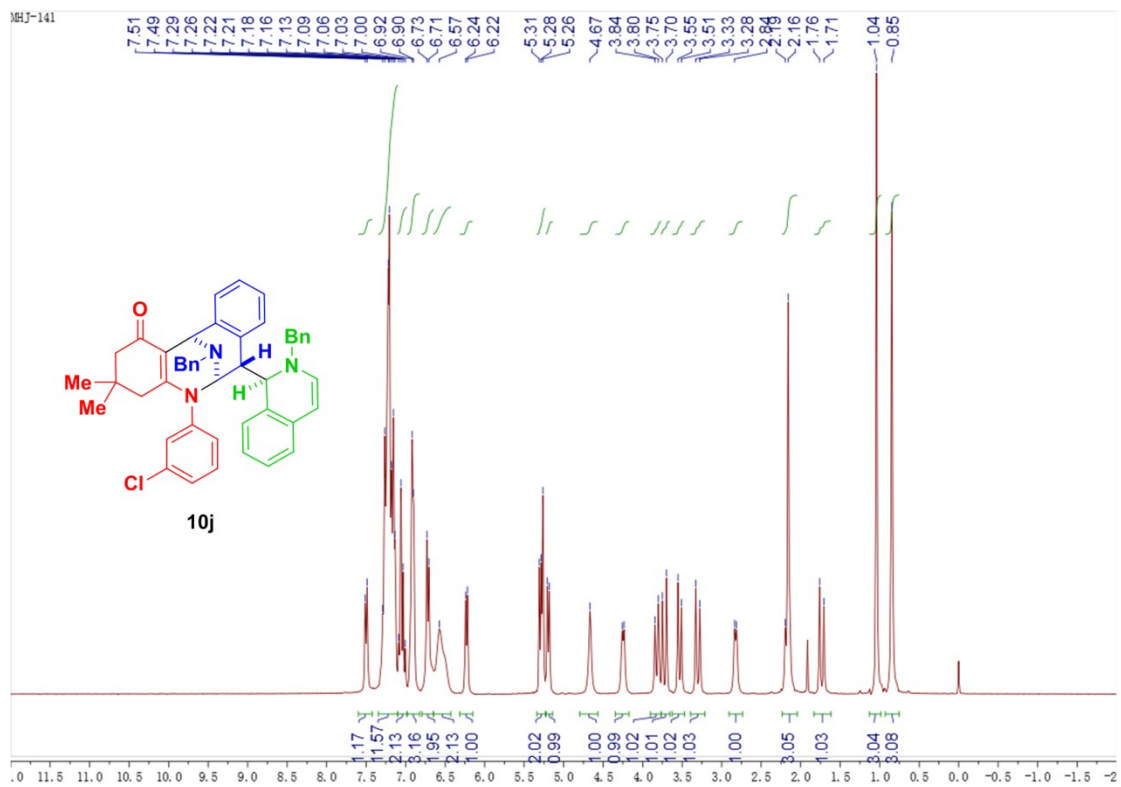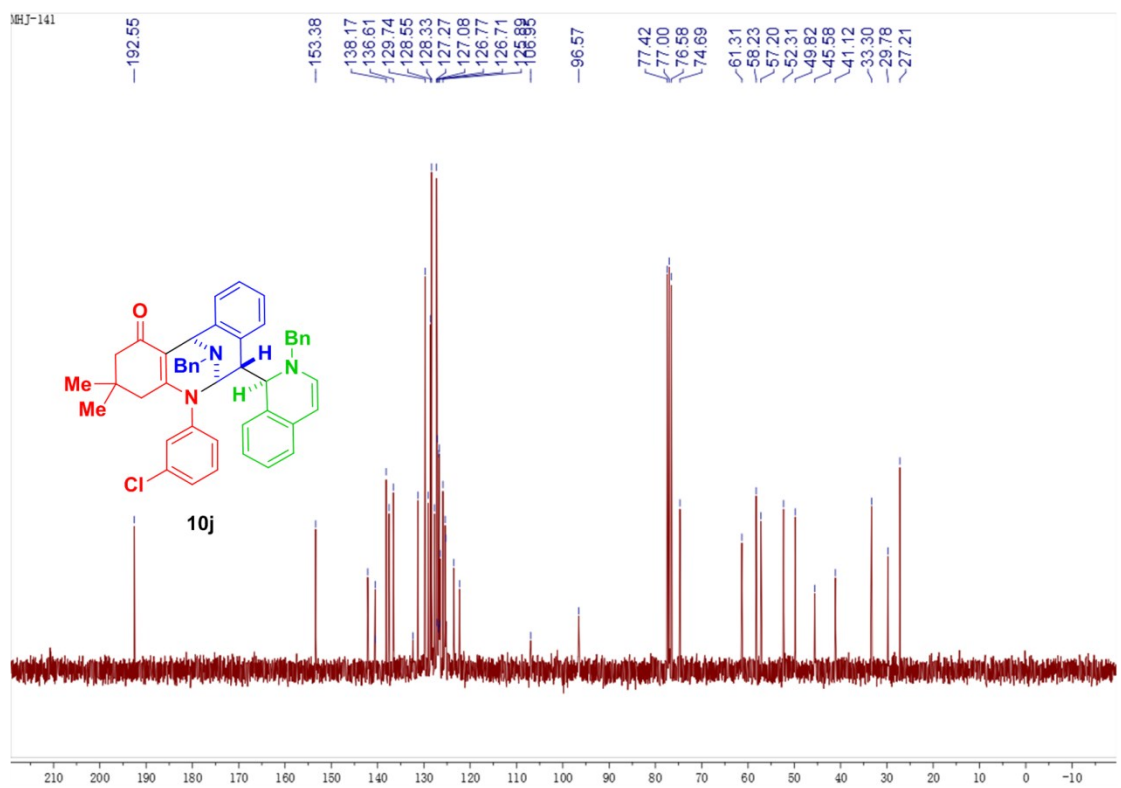

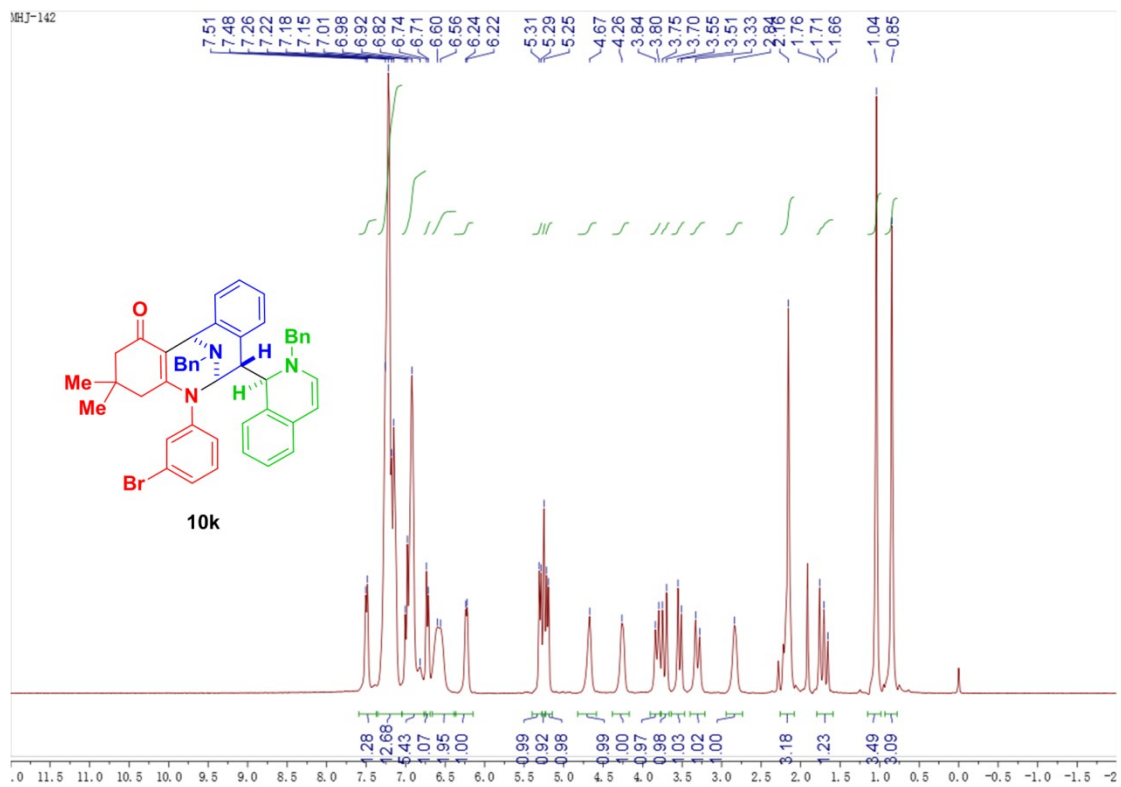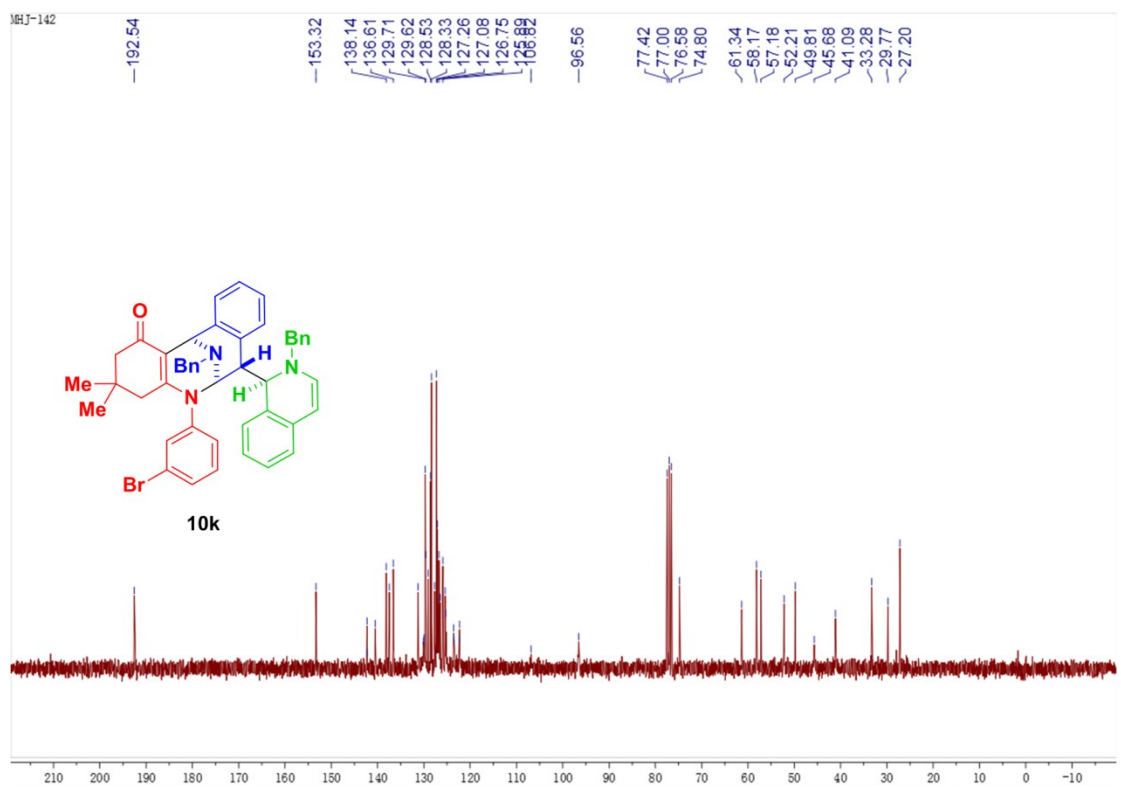



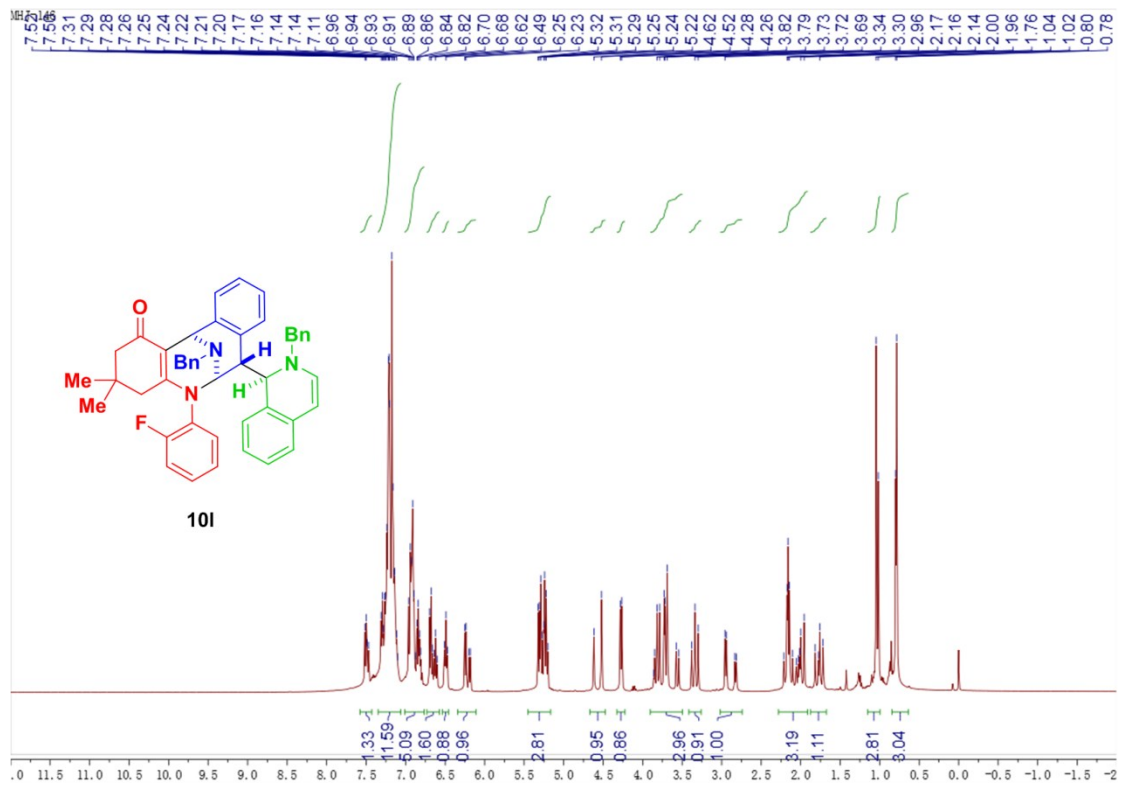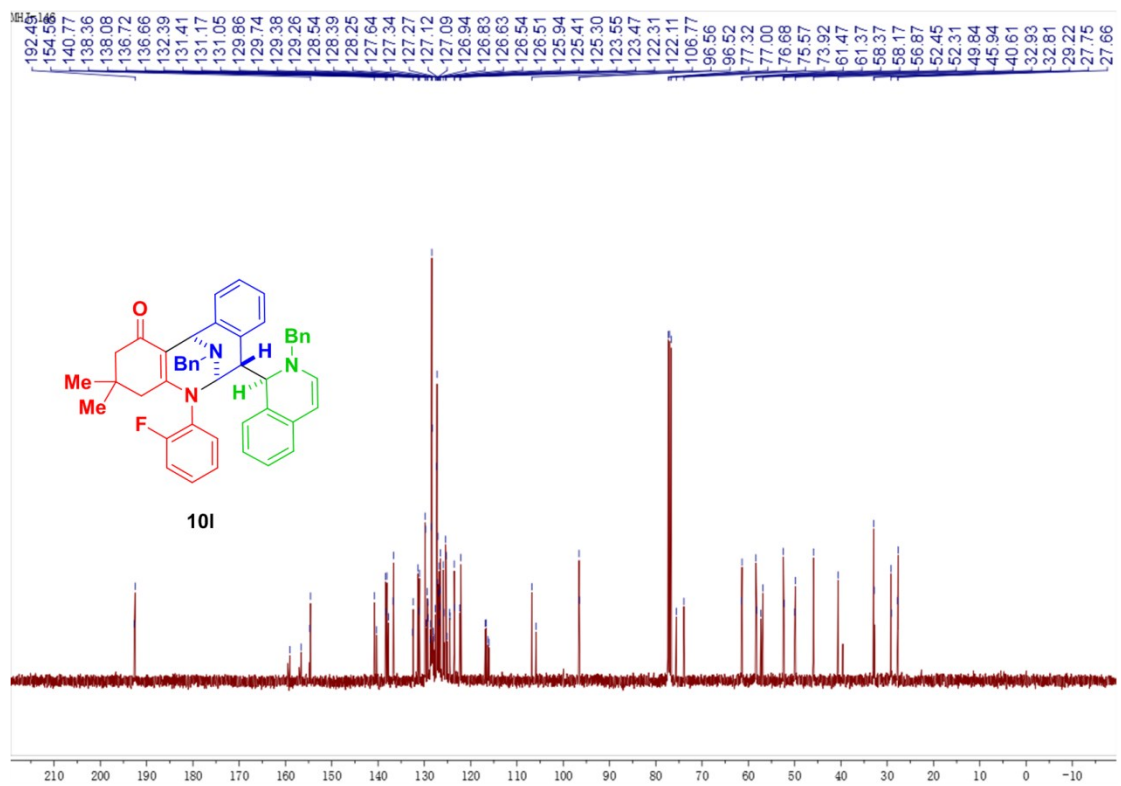

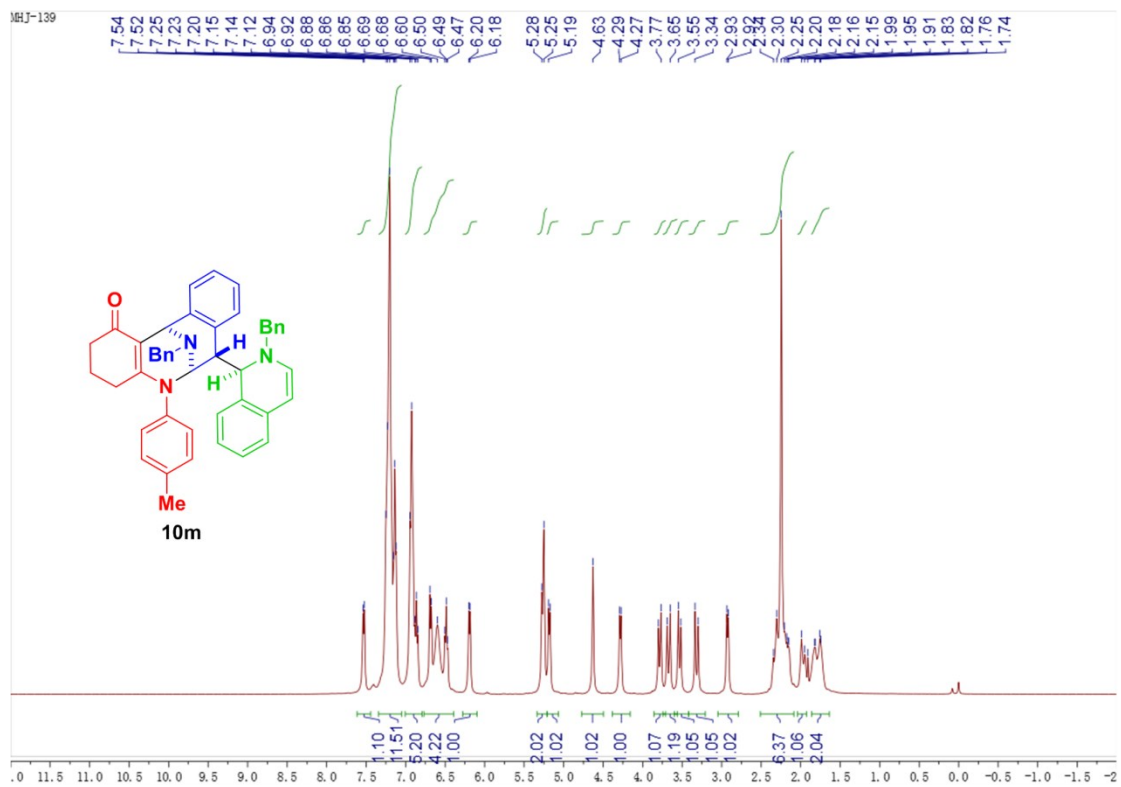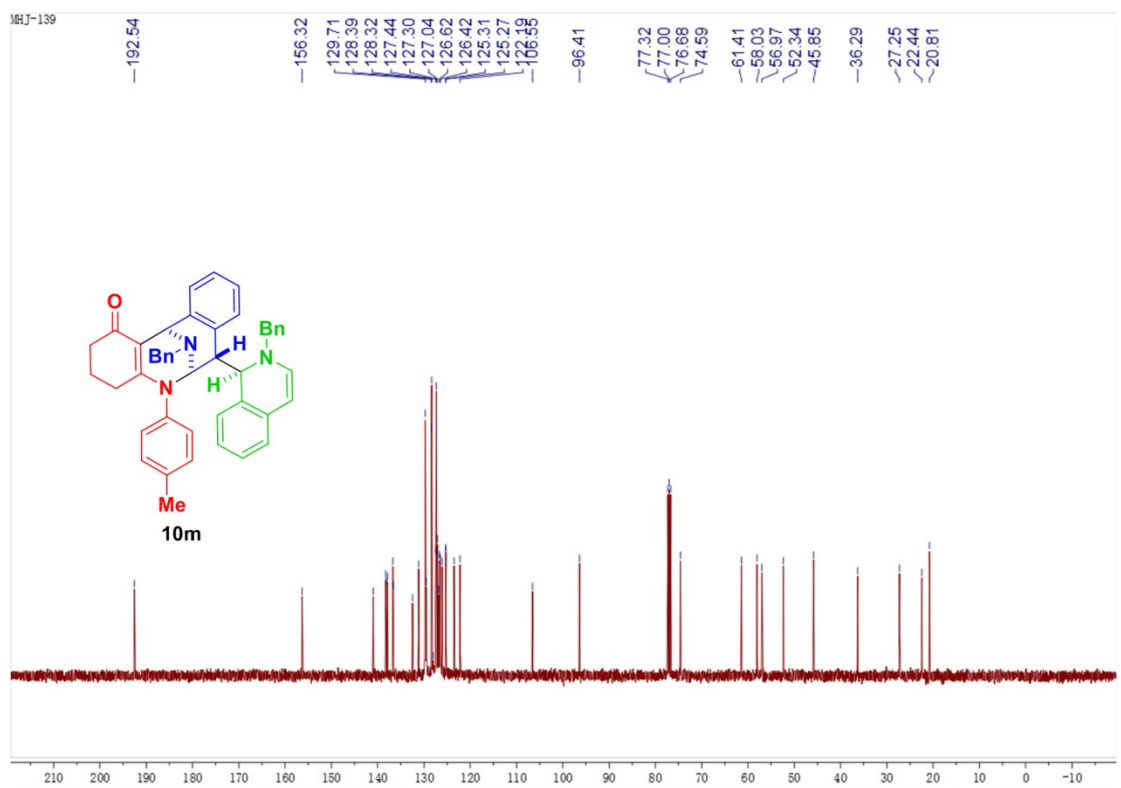

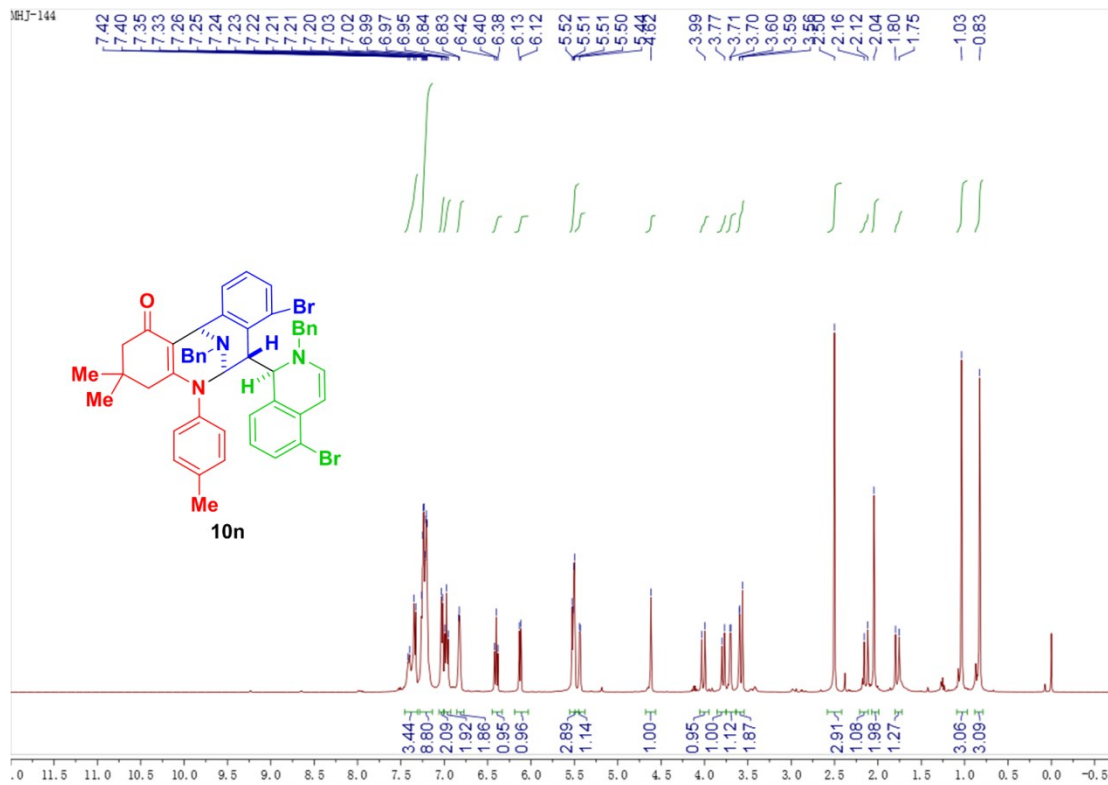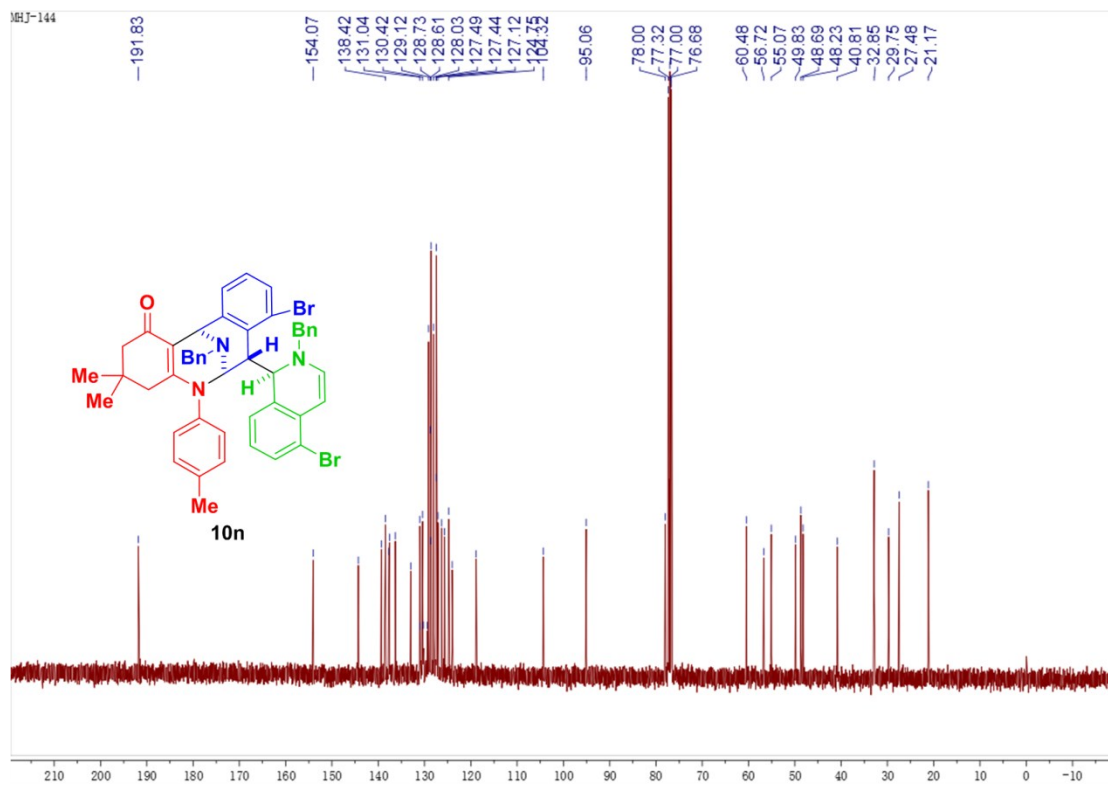

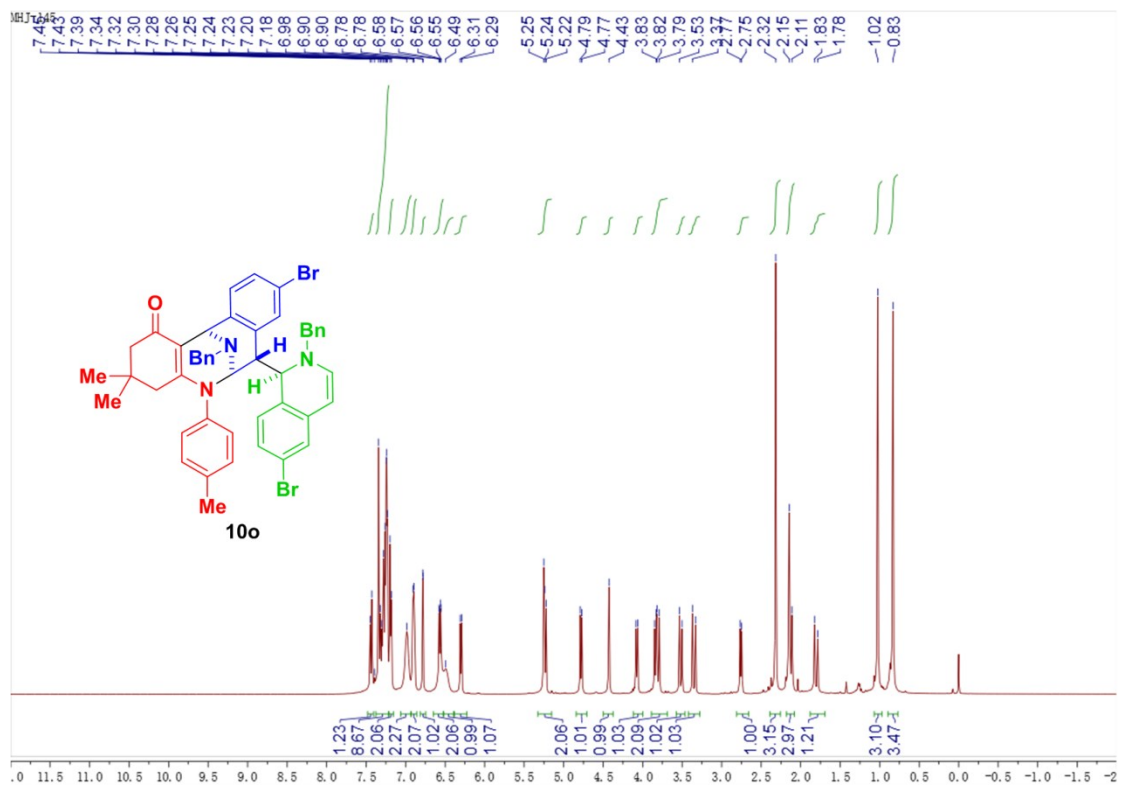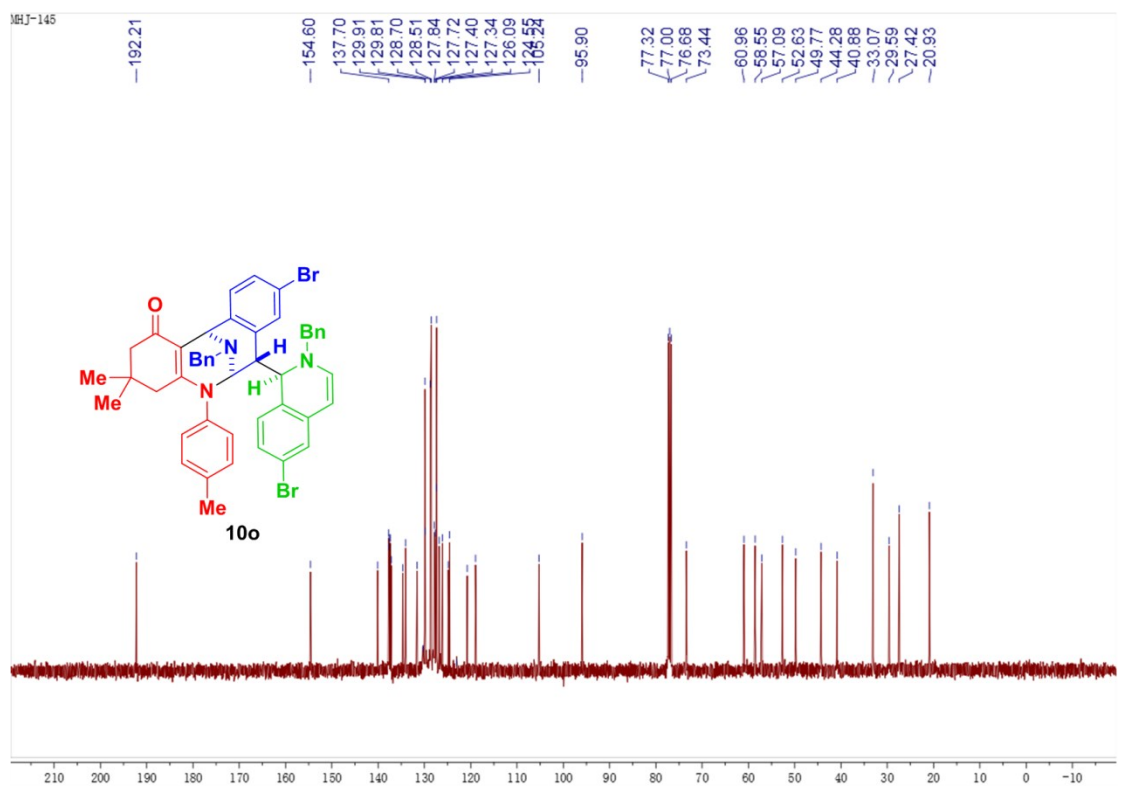

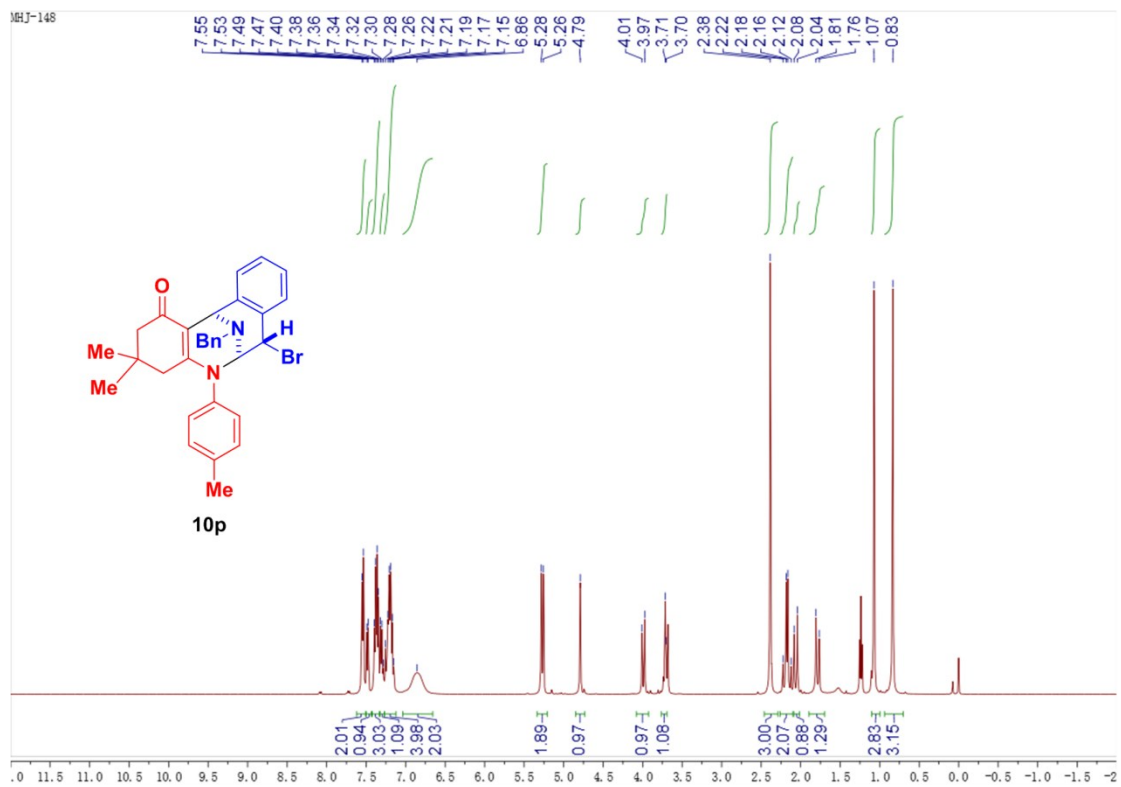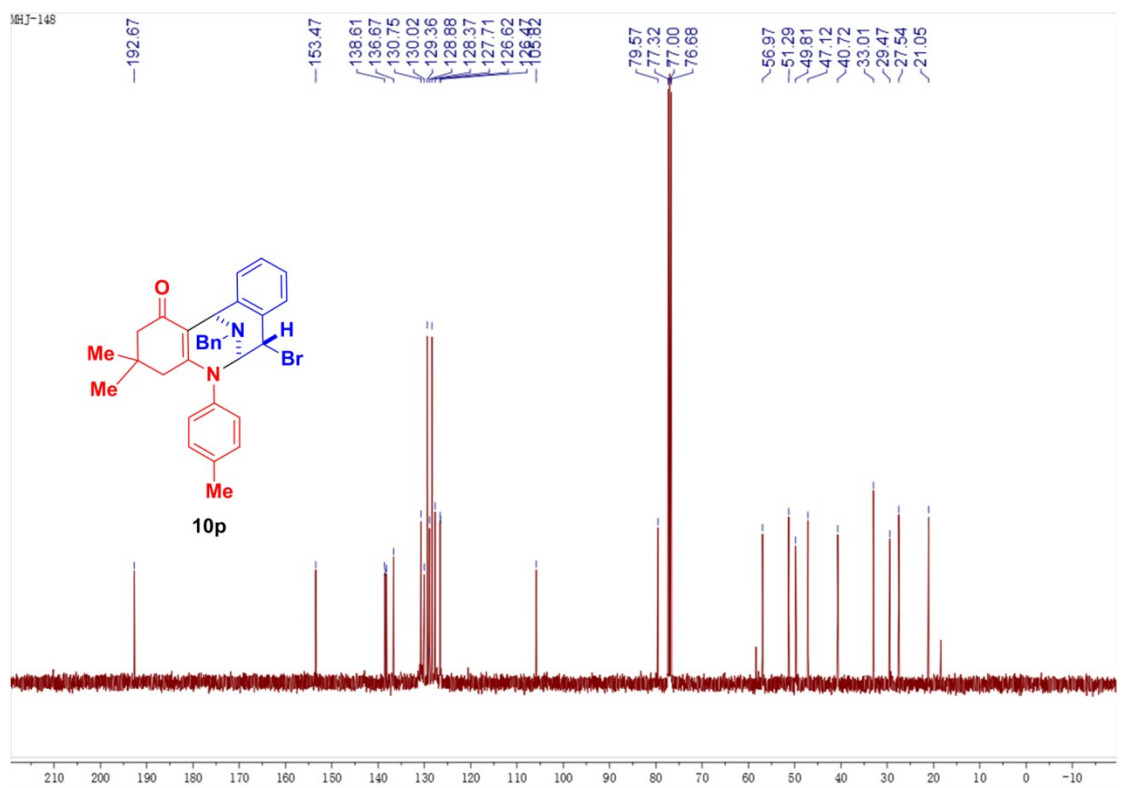

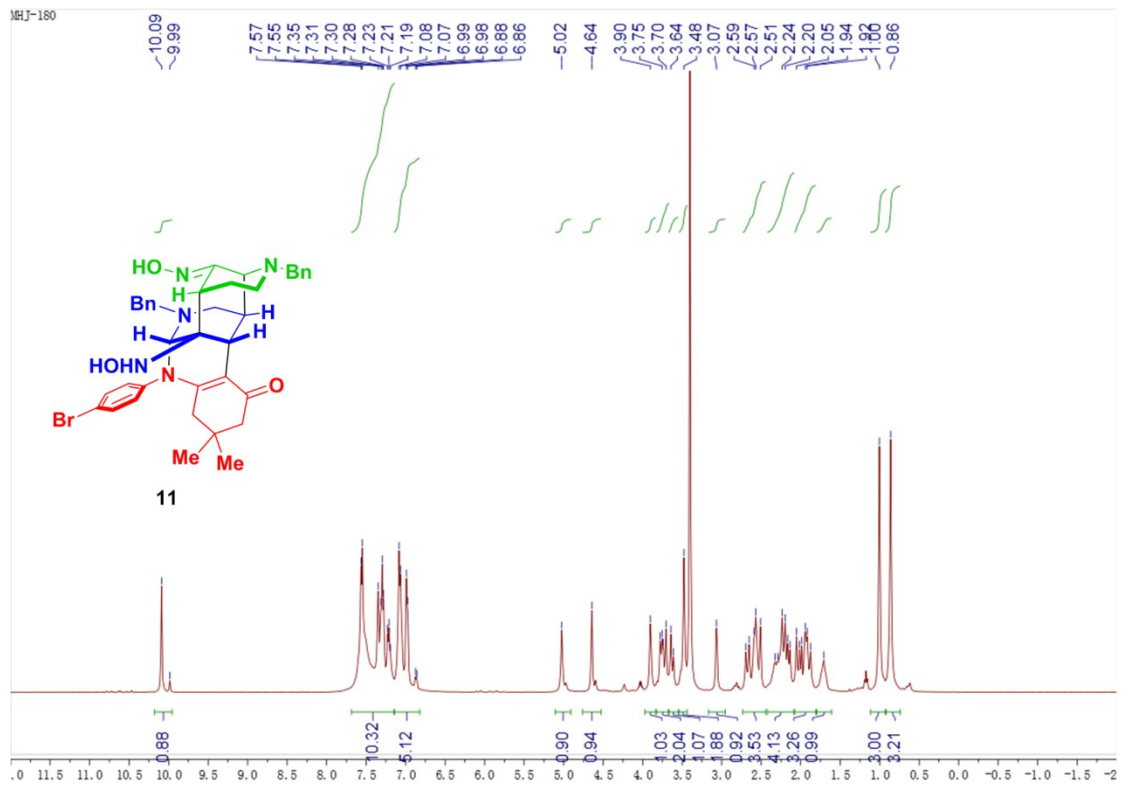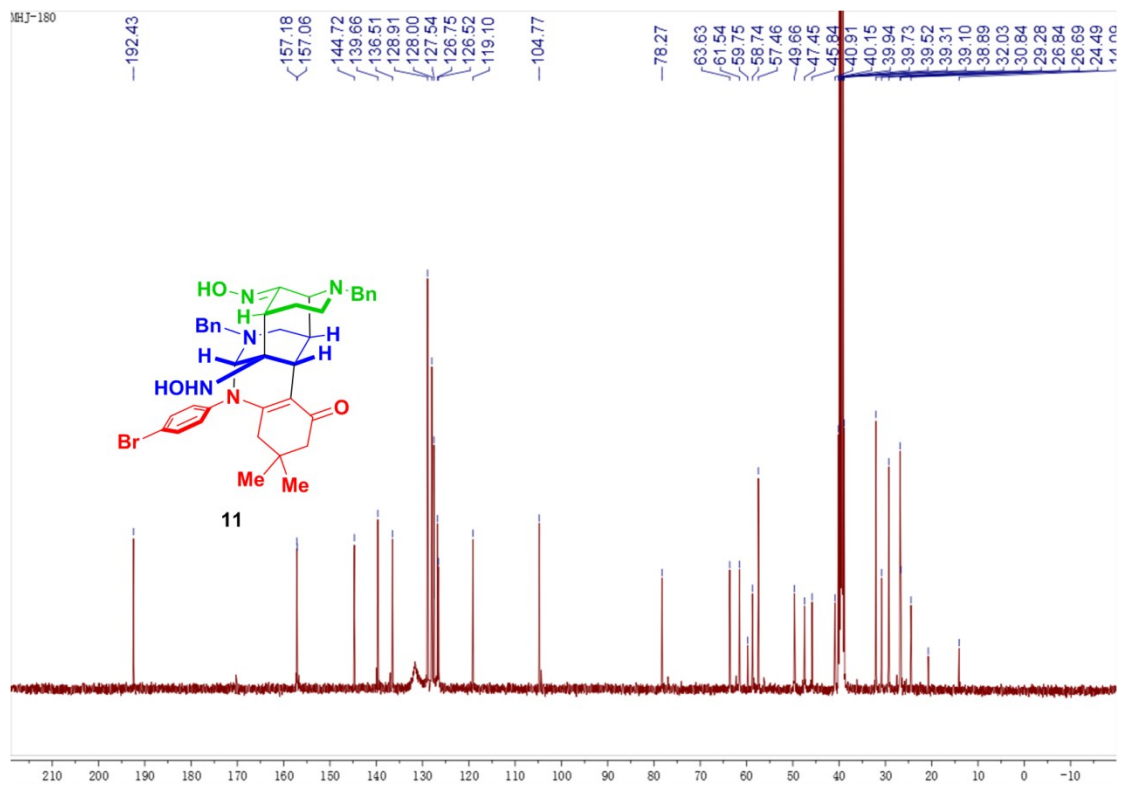

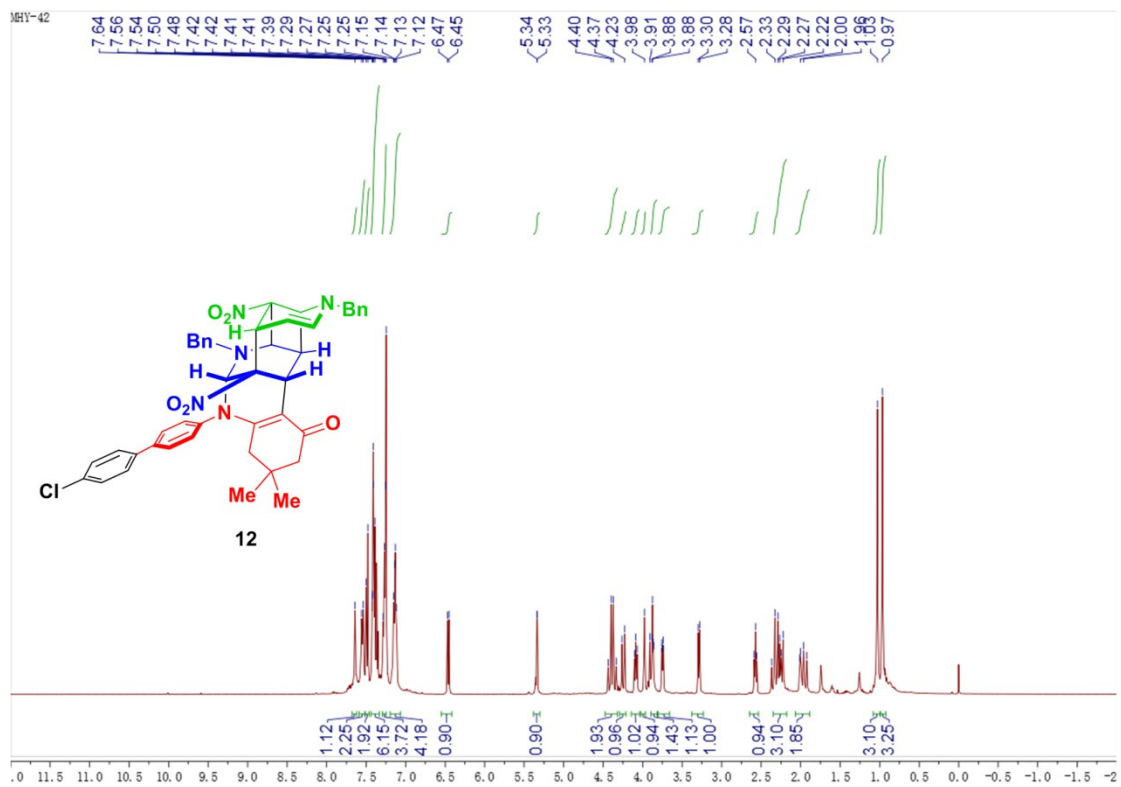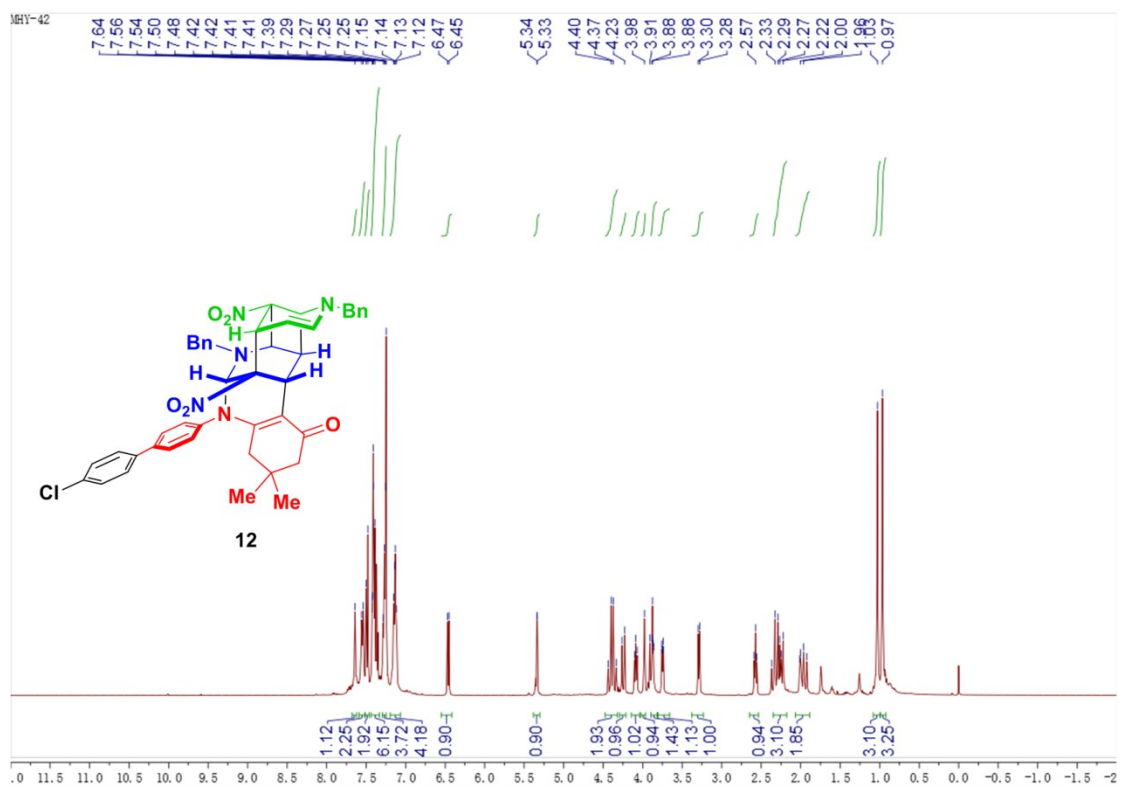

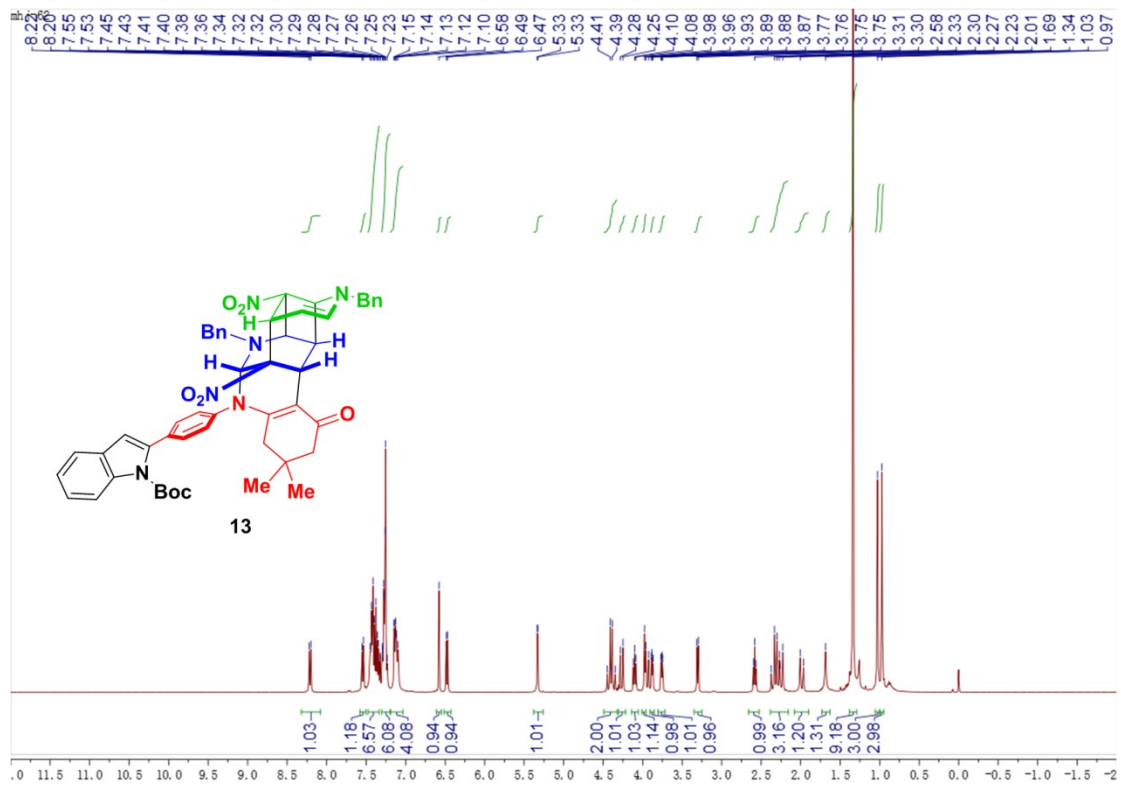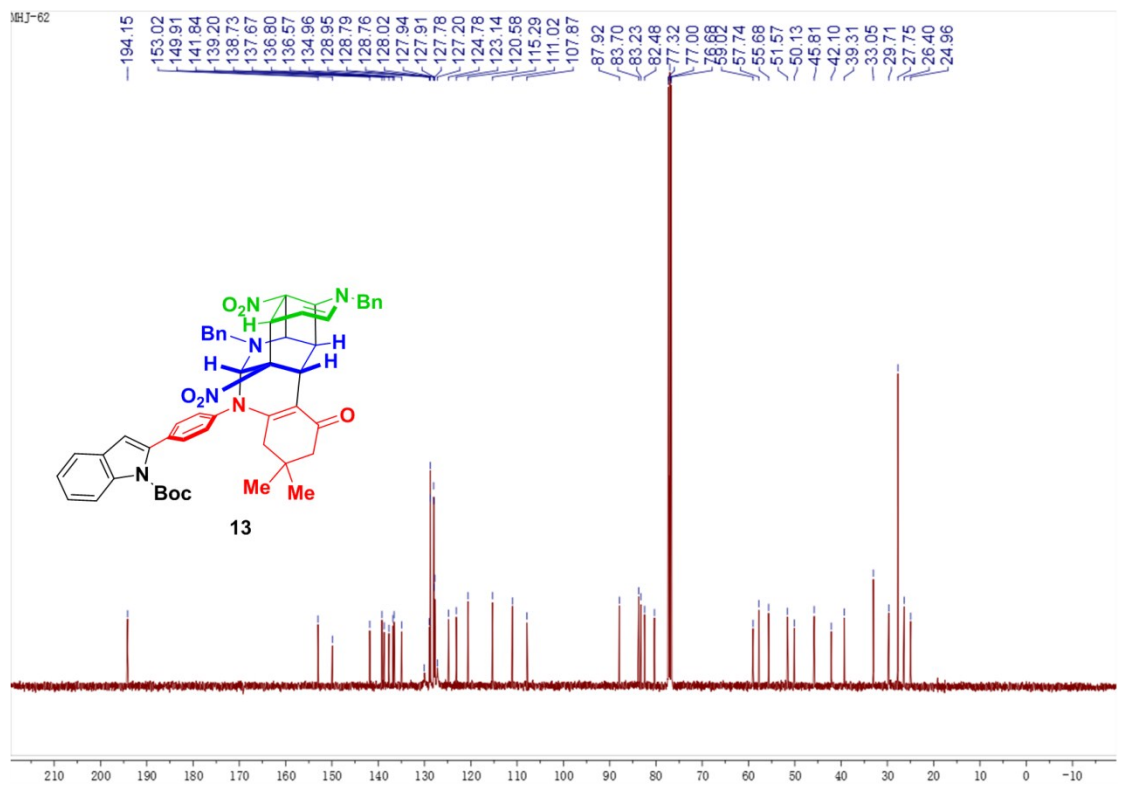

Supplement: SC-011-C9SC04880D-s001.pdf [file SC-011-C9SC04880D-s001.pdf]
